# Supplementary material for: Copy number variants (CNV) interfere with human Accelerated Regions (HARs) to cause neurodevelopmental disorders: a large-scale cohort study
Source: bioRxiv preprint, doi:10.64898/2025.12.29.696895, version 1 (2025-12-29)
Supplement: Supplemental Table 1-5 [file 696895_file02.xlsx]

## Sheet: Лист1
1) Annotation table of HARs
2) Table of the 50 most common HARs
3) Сo-occurrence matrix and Jaccard similarity matrix results table
4) Table of clusters of HARs
5) Annotation table (DECIPHER and DGV)

## Sheet: Tab.1
Chr	Start_Patient	End_Patient	Patient	Type	Chr.1	Start_HAR	End_HAR	Intersect_Start	Intersect_End	Overlap_Size	Func.refGene	Gene.refGene	HAR	HAR_ID	ChromHMM-Epigenomics Roadmap	Interacting genes (Goh et al., 2012; Jin et al., 2013; Li et al., 2010; Li et al., 2012; Ma et al., 2015)
chr1	849466	3585206	pat_001	Loss	chr1	2836802	2836824	2836802	2836824	22	intergenic	TTC34,ACTRT2	Toh_HAR521	HAR_Merge50-00001	15_Quies-ENCODE2012-HSMMtube_Skeletal_Muscle_Myotubes_Derived_from_HSMM,9_Het-Epithelial-Penis_Foreskin_Fibroblast_Primary_Cells_skin02,15_Quies-Blood_&_T-cell-CD8_Naive_Primary_Cells,14_ReprPCWk-Neurosph-Neurosphere_Cultured_Cells_Ganglionic_Eminence_Derived,14_ReprPCWk-Sm._Muscle-Colon_Smooth_Muscle,15_Quies-Brain-Fetal_Brain_Male,15_Quies-Brain-Brain_Hippocampus_Middle,14_ReprPCWk-Digestive-Fe…
chr1	849466	3585206	pat_001	Loss	chr1	3089754	3089889	3089754	3089889	135	intronic	PRDM16	Toh_HAR305,Pollard_HAR98	HAR_Merge50-00002	9_Het-Epithelial-Penis_Foreskin_Fibroblast_Primary_Cells_skin02,7_Enh-Brain-Brain_Mid_Frontal_Lobe,5_TxWk-Digestive-Rectal_Mucosa.Donor_29,14_ReprPCWk-Blood_&_T-cell-CD8_Naive_Primary_Cells,15_Quies-ES-deriv-hESC_Derived_CD56+_Mesoderm_Cultured_Cells,14_ReprPCWk-Digestive-Colonic_Mucosa,14_ReprPCWk-HSC_&_B-cell-CD19_Primary_Cells_Peripheral_UW,15_Quies-Digestive-Esophagus,14_ReprPCWk-ENCODE2012-M…
chr1	849466	7859191	pat_002	Loss	chr1	2836802	2836824	2836802	2836824	22	intergenic	TTC34,ACTRT2	Toh_HAR521	HAR_Merge50-00001	15_Quies-ENCODE2012-HSMMtube_Skeletal_Muscle_Myotubes_Derived_from_HSMM,9_Het-Epithelial-Penis_Foreskin_Fibroblast_Primary_Cells_skin02,15_Quies-Blood_&_T-cell-CD8_Naive_Primary_Cells,14_ReprPCWk-Neurosph-Neurosphere_Cultured_Cells_Ganglionic_Eminence_Derived,14_ReprPCWk-Sm._Muscle-Colon_Smooth_Muscle,15_Quies-Brain-Fetal_Brain_Male,15_Quies-Brain-Brain_Hippocampus_Middle,14_ReprPCWk-Digestive-Fe…
chr1	849466	7859191	pat_002	Loss	chr1	3089754	3089889	3089754	3089889	135	intronic	PRDM16	Toh_HAR305,Pollard_HAR98	HAR_Merge50-00002	9_Het-Epithelial-Penis_Foreskin_Fibroblast_Primary_Cells_skin02,7_Enh-Brain-Brain_Mid_Frontal_Lobe,5_TxWk-Digestive-Rectal_Mucosa.Donor_29,14_ReprPCWk-Blood_&_T-cell-CD8_Naive_Primary_Cells,15_Quies-ES-deriv-hESC_Derived_CD56+_Mesoderm_Cultured_Cells,14_ReprPCWk-Digestive-Colonic_Mucosa,14_ReprPCWk-HSC_&_B-cell-CD19_Primary_Cells_Peripheral_UW,15_Quies-Digestive-Esophagus,14_ReprPCWk-ENCODE2012-M…
chr1	849466	7859191	pat_002	Loss	chr1	7310705	7310825	7310705	7310825	120	intronic	CAMTA1	Prabhakar_HAR512	HAR_Merge50-00003	15_Quies-Blood_&_T-cell-CD8_Naive_Primary_Cells,14_ReprPCWk-Neurosph-Neurosphere_Cultured_Cells_Ganglionic_Eminence_Derived,14_ReprPCWk-Digestive-Fetal_Intestine_Small,15_Quies-Other-Pancreas,15_Quies-Digestive-Esophagus,14_ReprPCWk-ENCODE2012-Dnd41_TCell_Leukemia,15_Quies-Digestive-Rectal_Mucosa.Donor_29,14_ReprPCWk-ENCODE2012-Monocytes-CD14+_RO01746,15_Quies-ESC-ES-I3_Cell_Line,14_ReprPCWk-Bloo…
chr1	849466	7859191	pat_002	Loss	chr1	7651264	7651536	7651264	7651536	272	intronic	CAMTA1	Bird_HAR163	HAR_Merge50-00004	9_Het-Epithelial-Penis_Foreskin_Fibroblast_Primary_Cells_skin02,15_Quies-Blood_&_T-cell-CD8_Naive_Primary_Cells,14_ReprPCWk-Neurosph-Neurosphere_Cultured_Cells_Ganglionic_Eminence_Derived,14_ReprPCWk-Digestive-Fetal_Intestine_Small,14_ReprPCWk-Muscle-Fetal_Muscle_Trunk,15_Quies-Other-Pancreas,15_Quies-Digestive-Esophagus,14_ReprPCWk-ENCODE2012-Dnd41_TCell_Leukemia,15_Quies-Digestive-Rectal_Mucosa…
chr1	849466	7922297	pat_002	Loss	chr1	2836802	2836824	2836802	2836824	22	intergenic	TTC34,ACTRT2	Toh_HAR521	HAR_Merge50-00001	15_Quies-ENCODE2012-HSMMtube_Skeletal_Muscle_Myotubes_Derived_from_HSMM,9_Het-Epithelial-Penis_Foreskin_Fibroblast_Primary_Cells_skin02,15_Quies-Blood_&_T-cell-CD8_Naive_Primary_Cells,14_ReprPCWk-Neurosph-Neurosphere_Cultured_Cells_Ganglionic_Eminence_Derived,14_ReprPCWk-Sm._Muscle-Colon_Smooth_Muscle,15_Quies-Brain-Fetal_Brain_Male,15_Quies-Brain-Brain_Hippocampus_Middle,14_ReprPCWk-Digestive-Fe…
chr1	849466	7922297	pat_002	Loss	chr1	3089754	3089889	3089754	3089889	135	intronic	PRDM16	Toh_HAR305,Pollard_HAR98	HAR_Merge50-00002	9_Het-Epithelial-Penis_Foreskin_Fibroblast_Primary_Cells_skin02,7_Enh-Brain-Brain_Mid_Frontal_Lobe,5_TxWk-Digestive-Rectal_Mucosa.Donor_29,14_ReprPCWk-Blood_&_T-cell-CD8_Naive_Primary_Cells,15_Quies-ES-deriv-hESC_Derived_CD56+_Mesoderm_Cultured_Cells,14_ReprPCWk-Digestive-Colonic_Mucosa,14_ReprPCWk-HSC_&_B-cell-CD19_Primary_Cells_Peripheral_UW,15_Quies-Digestive-Esophagus,14_ReprPCWk-ENCODE2012-M…
chr1	849466	7922297	pat_002	Loss	chr1	7310705	7310825	7310705	7310825	120	intronic	CAMTA1	Prabhakar_HAR512	HAR_Merge50-00003	15_Quies-Blood_&_T-cell-CD8_Naive_Primary_Cells,14_ReprPCWk-Neurosph-Neurosphere_Cultured_Cells_Ganglionic_Eminence_Derived,14_ReprPCWk-Digestive-Fetal_Intestine_Small,15_Quies-Other-Pancreas,15_Quies-Digestive-Esophagus,14_ReprPCWk-ENCODE2012-Dnd41_TCell_Leukemia,15_Quies-Digestive-Rectal_Mucosa.Donor_29,14_ReprPCWk-ENCODE2012-Monocytes-CD14+_RO01746,15_Quies-ESC-ES-I3_Cell_Line,14_ReprPCWk-Bloo…
chr1	849466	7922297	pat_002	Loss	chr1	7651264	7651536	7651264	7651536	272	intronic	CAMTA1	Bird_HAR163	HAR_Merge50-00004	9_Het-Epithelial-Penis_Foreskin_Fibroblast_Primary_Cells_skin02,15_Quies-Blood_&_T-cell-CD8_Naive_Primary_Cells,14_ReprPCWk-Neurosph-Neurosphere_Cultured_Cells_Ganglionic_Eminence_Derived,14_ReprPCWk-Digestive-Fetal_Intestine_Small,14_ReprPCWk-Muscle-Fetal_Muscle_Trunk,15_Quies-Other-Pancreas,15_Quies-Digestive-Esophagus,14_ReprPCWk-ENCODE2012-Dnd41_TCell_Leukemia,15_Quies-Digestive-Rectal_Mucosa…
chr1	2205580	3123524	pat_003	Gain	chr1	2836802	2836824	2836802	2836824	22	intergenic	TTC34,ACTRT2	Toh_HAR521	HAR_Merge50-00001	15_Quies-ENCODE2012-HSMMtube_Skeletal_Muscle_Myotubes_Derived_from_HSMM,9_Het-Epithelial-Penis_Foreskin_Fibroblast_Primary_Cells_skin02,15_Quies-Blood_&_T-cell-CD8_Naive_Primary_Cells,14_ReprPCWk-Neurosph-Neurosphere_Cultured_Cells_Ganglionic_Eminence_Derived,14_ReprPCWk-Sm._Muscle-Colon_Smooth_Muscle,15_Quies-Brain-Fetal_Brain_Male,15_Quies-Brain-Brain_Hippocampus_Middle,14_ReprPCWk-Digestive-Fe…
chr1	2205580	3123524	pat_003	Gain	chr1	3089754	3089889	3089754	3089889	135	intronic	PRDM16	Toh_HAR305,Pollard_HAR98	HAR_Merge50-00002	9_Het-Epithelial-Penis_Foreskin_Fibroblast_Primary_Cells_skin02,7_Enh-Brain-Brain_Mid_Frontal_Lobe,5_TxWk-Digestive-Rectal_Mucosa.Donor_29,14_ReprPCWk-Blood_&_T-cell-CD8_Naive_Primary_Cells,15_Quies-ES-deriv-hESC_Derived_CD56+_Mesoderm_Cultured_Cells,14_ReprPCWk-Digestive-Colonic_Mucosa,14_ReprPCWk-HSC_&_B-cell-CD19_Primary_Cells_Peripheral_UW,15_Quies-Digestive-Esophagus,14_ReprPCWk-ENCODE2012-M…
chr1	2416100	3628023	pat_004	Gain	chr1	2836802	2836824	2836802	2836824	22	intergenic	TTC34,ACTRT2	Toh_HAR521	HAR_Merge50-00001	15_Quies-ENCODE2012-HSMMtube_Skeletal_Muscle_Myotubes_Derived_from_HSMM,9_Het-Epithelial-Penis_Foreskin_Fibroblast_Primary_Cells_skin02,15_Quies-Blood_&_T-cell-CD8_Naive_Primary_Cells,14_ReprPCWk-Neurosph-Neurosphere_Cultured_Cells_Ganglionic_Eminence_Derived,14_ReprPCWk-Sm._Muscle-Colon_Smooth_Muscle,15_Quies-Brain-Fetal_Brain_Male,15_Quies-Brain-Brain_Hippocampus_Middle,14_ReprPCWk-Digestive-Fe…
chr1	2416100	3628023	pat_004	Gain	chr1	3089754	3089889	3089754	3089889	135	intronic	PRDM16	Toh_HAR305,Pollard_HAR98	HAR_Merge50-00002	9_Het-Epithelial-Penis_Foreskin_Fibroblast_Primary_Cells_skin02,7_Enh-Brain-Brain_Mid_Frontal_Lobe,5_TxWk-Digestive-Rectal_Mucosa.Donor_29,14_ReprPCWk-Blood_&_T-cell-CD8_Naive_Primary_Cells,15_Quies-ES-deriv-hESC_Derived_CD56+_Mesoderm_Cultured_Cells,14_ReprPCWk-Digestive-Colonic_Mucosa,14_ReprPCWk-HSC_&_B-cell-CD19_Primary_Cells_Peripheral_UW,15_Quies-Digestive-Esophagus,14_ReprPCWk-ENCODE2012-M…
chr1	2475817	3328516	pat_005	Loss	chr1	2836802	2836824	2836802	2836824	22	intergenic	TTC34,ACTRT2	Toh_HAR521	HAR_Merge50-00001	15_Quies-ENCODE2012-HSMMtube_Skeletal_Muscle_Myotubes_Derived_from_HSMM,9_Het-Epithelial-Penis_Foreskin_Fibroblast_Primary_Cells_skin02,15_Quies-Blood_&_T-cell-CD8_Naive_Primary_Cells,14_ReprPCWk-Neurosph-Neurosphere_Cultured_Cells_Ganglionic_Eminence_Derived,14_ReprPCWk-Sm._Muscle-Colon_Smooth_Muscle,15_Quies-Brain-Fetal_Brain_Male,15_Quies-Brain-Brain_Hippocampus_Middle,14_ReprPCWk-Digestive-Fe…
chr1	2475817	3328516	pat_005	Loss	chr1	3089754	3089889	3089754	3089889	135	intronic	PRDM16	Toh_HAR305,Pollard_HAR98	HAR_Merge50-00002	9_Het-Epithelial-Penis_Foreskin_Fibroblast_Primary_Cells_skin02,7_Enh-Brain-Brain_Mid_Frontal_Lobe,5_TxWk-Digestive-Rectal_Mucosa.Donor_29,14_ReprPCWk-Blood_&_T-cell-CD8_Naive_Primary_Cells,15_Quies-ES-deriv-hESC_Derived_CD56+_Mesoderm_Cultured_Cells,14_ReprPCWk-Digestive-Colonic_Mucosa,14_ReprPCWk-HSC_&_B-cell-CD19_Primary_Cells_Peripheral_UW,15_Quies-Digestive-Esophagus,14_ReprPCWk-ENCODE2012-M…
chr1	2579327	3202884	pat_006	Gain	chr1	2836802	2836824	2836802	2836824	22	intergenic	TTC34,ACTRT2	Toh_HAR521	HAR_Merge50-00001	15_Quies-ENCODE2012-HSMMtube_Skeletal_Muscle_Myotubes_Derived_from_HSMM,9_Het-Epithelial-Penis_Foreskin_Fibroblast_Primary_Cells_skin02,15_Quies-Blood_&_T-cell-CD8_Naive_Primary_Cells,14_ReprPCWk-Neurosph-Neurosphere_Cultured_Cells_Ganglionic_Eminence_Derived,14_ReprPCWk-Sm._Muscle-Colon_Smooth_Muscle,15_Quies-Brain-Fetal_Brain_Male,15_Quies-Brain-Brain_Hippocampus_Middle,14_ReprPCWk-Digestive-Fe…
chr1	2579327	3202884	pat_006	Gain	chr1	3089754	3089889	3089754	3089889	135	intronic	PRDM16	Toh_HAR305,Pollard_HAR98	HAR_Merge50-00002	9_Het-Epithelial-Penis_Foreskin_Fibroblast_Primary_Cells_skin02,7_Enh-Brain-Brain_Mid_Frontal_Lobe,5_TxWk-Digestive-Rectal_Mucosa.Donor_29,14_ReprPCWk-Blood_&_T-cell-CD8_Naive_Primary_Cells,15_Quies-ES-deriv-hESC_Derived_CD56+_Mesoderm_Cultured_Cells,14_ReprPCWk-Digestive-Colonic_Mucosa,14_ReprPCWk-HSC_&_B-cell-CD19_Primary_Cells_Peripheral_UW,15_Quies-Digestive-Esophagus,14_ReprPCWk-ENCODE2012-M…
chr1	2619887	2879530	pat_007	Gain	chr1	2836802	2836824	2836802	2836824	22	intergenic	TTC34,ACTRT2	Toh_HAR521	HAR_Merge50-00001	15_Quies-ENCODE2012-HSMMtube_Skeletal_Muscle_Myotubes_Derived_from_HSMM,9_Het-Epithelial-Penis_Foreskin_Fibroblast_Primary_Cells_skin02,15_Quies-Blood_&_T-cell-CD8_Naive_Primary_Cells,14_ReprPCWk-Neurosph-Neurosphere_Cultured_Cells_Ganglionic_Eminence_Derived,14_ReprPCWk-Sm._Muscle-Colon_Smooth_Muscle,15_Quies-Brain-Fetal_Brain_Male,15_Quies-Brain-Brain_Hippocampus_Middle,14_ReprPCWk-Digestive-Fe…
chr1	2701999	2959671	pat_008	Gain	chr1	2836802	2836824	2836802	2836824	22	intergenic	TTC34,ACTRT2	Toh_HAR521	HAR_Merge50-00001	15_Quies-ENCODE2012-HSMMtube_Skeletal_Muscle_Myotubes_Derived_from_HSMM,9_Het-Epithelial-Penis_Foreskin_Fibroblast_Primary_Cells_skin02,15_Quies-Blood_&_T-cell-CD8_Naive_Primary_Cells,14_ReprPCWk-Neurosph-Neurosphere_Cultured_Cells_Ganglionic_Eminence_Derived,14_ReprPCWk-Sm._Muscle-Colon_Smooth_Muscle,15_Quies-Brain-Fetal_Brain_Male,15_Quies-Brain-Brain_Hippocampus_Middle,14_ReprPCWk-Digestive-Fe…
chr1	2709299	2932446	pat_009	Gain	chr1	2836802	2836824	2836802	2836824	22	intergenic	TTC34,ACTRT2	Toh_HAR521	HAR_Merge50-00001	15_Quies-ENCODE2012-HSMMtube_Skeletal_Muscle_Myotubes_Derived_from_HSMM,9_Het-Epithelial-Penis_Foreskin_Fibroblast_Primary_Cells_skin02,15_Quies-Blood_&_T-cell-CD8_Naive_Primary_Cells,14_ReprPCWk-Neurosph-Neurosphere_Cultured_Cells_Ganglionic_Eminence_Derived,14_ReprPCWk-Sm._Muscle-Colon_Smooth_Muscle,15_Quies-Brain-Fetal_Brain_Male,15_Quies-Brain-Brain_Hippocampus_Middle,14_ReprPCWk-Digestive-Fe…
chr1	2793846	2867961	pat_010	Gain	chr1	2836802	2836824	2836802	2836824	22	intergenic	TTC34,ACTRT2	Toh_HAR521	HAR_Merge50-00001	15_Quies-ENCODE2012-HSMMtube_Skeletal_Muscle_Myotubes_Derived_from_HSMM,9_Het-Epithelial-Penis_Foreskin_Fibroblast_Primary_Cells_skin02,15_Quies-Blood_&_T-cell-CD8_Naive_Primary_Cells,14_ReprPCWk-Neurosph-Neurosphere_Cultured_Cells_Ganglionic_Eminence_Derived,14_ReprPCWk-Sm._Muscle-Colon_Smooth_Muscle,15_Quies-Brain-Fetal_Brain_Male,15_Quies-Brain-Brain_Hippocampus_Middle,14_ReprPCWk-Digestive-Fe…
chr1	2793846	3123524	pat_011	Gain	chr1	2836802	2836824	2836802	2836824	22	intergenic	TTC34,ACTRT2	Toh_HAR521	HAR_Merge50-00001	15_Quies-ENCODE2012-HSMMtube_Skeletal_Muscle_Myotubes_Derived_from_HSMM,9_Het-Epithelial-Penis_Foreskin_Fibroblast_Primary_Cells_skin02,15_Quies-Blood_&_T-cell-CD8_Naive_Primary_Cells,14_ReprPCWk-Neurosph-Neurosphere_Cultured_Cells_Ganglionic_Eminence_Derived,14_ReprPCWk-Sm._Muscle-Colon_Smooth_Muscle,15_Quies-Brain-Fetal_Brain_Male,15_Quies-Brain-Brain_Hippocampus_Middle,14_ReprPCWk-Digestive-Fe…
chr1	2793846	3123524	pat_011	Gain	chr1	3089754	3089889	3089754	3089889	135	intronic	PRDM16	Toh_HAR305,Pollard_HAR98	HAR_Merge50-00002	9_Het-Epithelial-Penis_Foreskin_Fibroblast_Primary_Cells_skin02,7_Enh-Brain-Brain_Mid_Frontal_Lobe,5_TxWk-Digestive-Rectal_Mucosa.Donor_29,14_ReprPCWk-Blood_&_T-cell-CD8_Naive_Primary_Cells,15_Quies-ES-deriv-hESC_Derived_CD56+_Mesoderm_Cultured_Cells,14_ReprPCWk-Digestive-Colonic_Mucosa,14_ReprPCWk-HSC_&_B-cell-CD19_Primary_Cells_Peripheral_UW,15_Quies-Digestive-Esophagus,14_ReprPCWk-ENCODE2012-M…
chr1	3041546	3130134	pat_012	Gain	chr1	3089754	3089889	3089754	3089889	135	intronic	PRDM16	Toh_HAR305,Pollard_HAR98	HAR_Merge50-00002	9_Het-Epithelial-Penis_Foreskin_Fibroblast_Primary_Cells_skin02,7_Enh-Brain-Brain_Mid_Frontal_Lobe,5_TxWk-Digestive-Rectal_Mucosa.Donor_29,14_ReprPCWk-Blood_&_T-cell-CD8_Naive_Primary_Cells,15_Quies-ES-deriv-hESC_Derived_CD56+_Mesoderm_Cultured_Cells,14_ReprPCWk-Digestive-Colonic_Mucosa,14_ReprPCWk-HSC_&_B-cell-CD19_Primary_Cells_Peripheral_UW,15_Quies-Digestive-Esophagus,14_ReprPCWk-ENCODE2012-M…
chr1	3054107	3155777	pat_013	Gain	chr1	3089754	3089889	3089754	3089889	135	intronic	PRDM16	Toh_HAR305,Pollard_HAR98	HAR_Merge50-00002	9_Het-Epithelial-Penis_Foreskin_Fibroblast_Primary_Cells_skin02,7_Enh-Brain-Brain_Mid_Frontal_Lobe,5_TxWk-Digestive-Rectal_Mucosa.Donor_29,14_ReprPCWk-Blood_&_T-cell-CD8_Naive_Primary_Cells,15_Quies-ES-deriv-hESC_Derived_CD56+_Mesoderm_Cultured_Cells,14_ReprPCWk-Digestive-Colonic_Mucosa,14_ReprPCWk-HSC_&_B-cell-CD19_Primary_Cells_Peripheral_UW,15_Quies-Digestive-Esophagus,14_ReprPCWk-ENCODE2012-M…
chr1	3062908	3091261	pat_010	Gain	chr1	3089754	3089889	3089754	3089889	135	intronic	PRDM16	Toh_HAR305,Pollard_HAR98	HAR_Merge50-00002	9_Het-Epithelial-Penis_Foreskin_Fibroblast_Primary_Cells_skin02,7_Enh-Brain-Brain_Mid_Frontal_Lobe,5_TxWk-Digestive-Rectal_Mucosa.Donor_29,14_ReprPCWk-Blood_&_T-cell-CD8_Naive_Primary_Cells,15_Quies-ES-deriv-hESC_Derived_CD56+_Mesoderm_Cultured_Cells,14_ReprPCWk-Digestive-Colonic_Mucosa,14_ReprPCWk-HSC_&_B-cell-CD19_Primary_Cells_Peripheral_UW,15_Quies-Digestive-Esophagus,14_ReprPCWk-ENCODE2012-M…
chr1	3628263	9722348	pat_001	Loss	chr1	7310705	7310825	7310705	7310825	120	intronic	CAMTA1	Prabhakar_HAR512	HAR_Merge50-00003	15_Quies-Blood_&_T-cell-CD8_Naive_Primary_Cells,14_ReprPCWk-Neurosph-Neurosphere_Cultured_Cells_Ganglionic_Eminence_Derived,14_ReprPCWk-Digestive-Fetal_Intestine_Small,15_Quies-Other-Pancreas,15_Quies-Digestive-Esophagus,14_ReprPCWk-ENCODE2012-Dnd41_TCell_Leukemia,15_Quies-Digestive-Rectal_Mucosa.Donor_29,14_ReprPCWk-ENCODE2012-Monocytes-CD14+_RO01746,15_Quies-ESC-ES-I3_Cell_Line,14_ReprPCWk-Bloo…
chr1	3628263	9722348	pat_001	Loss	chr1	8060033	8060380	8060033	8060380	347	intergenic	PARK7,ERRFI1	Bird_HAR165	HAR_Merge50-00005	15_Quies-Blood_&_T-cell-CD8_Naive_Primary_Cells,5_TxWk-Digestive-Rectal_Mucosa.Donor_29,5_TxWk-Digestive-Colonic_Mucosa,5_TxWk-Heart-Left_Ventricle,5_TxWk-Blood_&_T-cell-CD4+_CD25-_CD45RA+_Naive_Primary_Cells,15_Quies-ESC-ES-I3_Cell_Line,15_Quies-Muscle-Skeletal_Muscle_Male,5_TxWk-Epithelial-Penis_Foreskin_Fibroblast_Primary_Cells_skin02,15_Quies-iPSC-iPS_DF_6.9_Cell_Line,15_Quies-ENCODE2012-Mono…	ERRFI1
chr1	3628263	9722348	pat_001	Loss	chr1	7651264	7651536	7651264	7651536	272	intronic	CAMTA1	Bird_HAR163	HAR_Merge50-00004	9_Het-Epithelial-Penis_Foreskin_Fibroblast_Primary_Cells_skin02,15_Quies-Blood_&_T-cell-CD8_Naive_Primary_Cells,14_ReprPCWk-Neurosph-Neurosphere_Cultured_Cells_Ganglionic_Eminence_Derived,14_ReprPCWk-Digestive-Fetal_Intestine_Small,14_ReprPCWk-Muscle-Fetal_Muscle_Trunk,15_Quies-Other-Pancreas,15_Quies-Digestive-Esophagus,14_ReprPCWk-ENCODE2012-Dnd41_TCell_Leukemia,15_Quies-Digestive-Rectal_Mucosa…
chr1	7305645	7331314	pat_010	Gain	chr1	7310705	7310825	7310705	7310825	120	intronic	CAMTA1	Prabhakar_HAR512	HAR_Merge50-00003	15_Quies-Blood_&_T-cell-CD8_Naive_Primary_Cells,14_ReprPCWk-Neurosph-Neurosphere_Cultured_Cells_Ganglionic_Eminence_Derived,14_ReprPCWk-Digestive-Fetal_Intestine_Small,15_Quies-Other-Pancreas,15_Quies-Digestive-Esophagus,14_ReprPCWk-ENCODE2012-Dnd41_TCell_Leukemia,15_Quies-Digestive-Rectal_Mucosa.Donor_29,14_ReprPCWk-ENCODE2012-Monocytes-CD14+_RO01746,15_Quies-ESC-ES-I3_Cell_Line,14_ReprPCWk-Bloo…
chr1	7539732	7758798	pat_010	Gain	chr1	7651264	7651536	7651264	7651536	272	intronic	CAMTA1	Bird_HAR163	HAR_Merge50-00004	9_Het-Epithelial-Penis_Foreskin_Fibroblast_Primary_Cells_skin02,15_Quies-Blood_&_T-cell-CD8_Naive_Primary_Cells,14_ReprPCWk-Neurosph-Neurosphere_Cultured_Cells_Ganglionic_Eminence_Derived,14_ReprPCWk-Digestive-Fetal_Intestine_Small,14_ReprPCWk-Muscle-Fetal_Muscle_Trunk,15_Quies-Other-Pancreas,15_Quies-Digestive-Esophagus,14_ReprPCWk-ENCODE2012-Dnd41_TCell_Leukemia,15_Quies-Digestive-Rectal_Mucosa…
chr1	10548848	10613167	pat_010	Loss	chr1	10588930	10589267	10588930	10589267	337	intronic	PEX14	Bird_HAR432	HAR_Merge50-00006	7_Enh-Heart-Aorta,7_Enh-ENCODE2012-A549_EtOH_0.02pct_Lung_Carcinoma,5_TxWk-Digestive-Rectal_Mucosa.Donor_29,5_TxWk-HSC_&_B-cell-CD19_Primary_Cells_Peripheral_UW,5_TxWk-Blood_&_T-cell-CD4+_CD25-_CD45RA+_Naive_Primary_Cells,2_TssAFlnk-ENCODE2012-HeLa-S3_Cervical_Carcinoma,2_TssAFlnk-Sm._Muscle-Rectal_Smooth_Muscle,5_TxWk-Epithelial-Penis_Foreskin_Fibroblast_Primary_Cells_skin02,7_Enh-Digestive-Esop…
chr1	11484363	11526896	pat_010	Gain	chr1	11507933	11508064	11507933	11508064	131	intergenic	UBIAD1,PTCHD2	Prabhakar_HAR735	HAR_Merge50-00008	15_Quies-Blood_&_T-cell-CD8_Naive_Primary_Cells,14_ReprPCWk-Neurosph-Neurosphere_Cultured_Cells_Ganglionic_Eminence_Derived,14_ReprPCWk-Digestive-Fetal_Intestine_Small,13_ReprPC-Mesench-Bone_Marrow_Derived_Mesenchymal_Stem_Cell_Cultured_Cells,14_ReprPCWk-Digestive-Colonic_Mucosa,14_ReprPCWk-Brain-Brain_Germinal_Matrix,14_ReprPCWk-ENCODE2012-Dnd41_TCell_Leukemia,15_Quies-Other-Pancreas,14_ReprPCWk…
chr1	13709901	21860784	pat_014	Loss	chr1	19688085	19688407	19688085	19688407	322	intronic	CAPZB	Toh_HAR234,Bird_HAR74	HAR_Merge50-00009	7_Enh-Brain-Brain_Mid_Frontal_Lobe,5_TxWk-Other-Fetal_Adrenal_Gland,5_TxWk-Digestive-Rectal_Mucosa.Donor_29,5_TxWk-HSC_&_B-cell-CD19_Primary_Cells_Peripheral_UW,5_TxWk-Digestive-Colonic_Mucosa,7_Enh-Blood_&_T-cell-CD4+_CD25-_Th_Primary_Cells,5_TxWk-ENCODE2012-HepG2_Hepatocellular_Carcinoma,2_TssAFlnk-Epithelial-Penis_Foreskin_Keratinocyte_Primary_Cells_skin02,5_TxWk-Blood_&_T-cell-CD3_Primary_Cel…	NBL1
chr1	13709901	21860784	pat_014	Loss	chr1	20713360	20713539	20713360	20713539	179	ncRNA_intronic	LOC339505	Bird_HAR452	HAR_Merge50-00010	7_Enh-Brain-Brain_Mid_Frontal_Lobe,13_ReprPC-ESC-HUES64_Cell_Line,14_ReprPCWk-Blood_&_T-cell-CD8_Naive_Primary_Cells,13_ReprPC-Digestive-Stomach_Mucosa,13_ReprPC-Mesench-Bone_Marrow_Derived_Mesenchymal_Stem_Cell_Cultured_Cells,14_ReprPCWk-HSC_&_B-cell-CD19_Primary_Cells_Peripheral_UW,12_EnhBiv-ESC-HUES48_Cell_Line,13_ReprPC-Digestive-Rectal_Mucosa.Donor_29,13_ReprPC-HSC_&_B-cell-CD14_Primary_Cell…	DDOST,MUL1,PINK1,LOC339505
chr1	19644854	19739156	pat_010	Gain	chr1	19688085	19688407	19688085	19688407	322	intronic	CAPZB	Toh_HAR234,Bird_HAR74	HAR_Merge50-00009	7_Enh-Brain-Brain_Mid_Frontal_Lobe,5_TxWk-Other-Fetal_Adrenal_Gland,5_TxWk-Digestive-Rectal_Mucosa.Donor_29,5_TxWk-HSC_&_B-cell-CD19_Primary_Cells_Peripheral_UW,5_TxWk-Digestive-Colonic_Mucosa,7_Enh-Blood_&_T-cell-CD4+_CD25-_Th_Primary_Cells,5_TxWk-ENCODE2012-HepG2_Hepatocellular_Carcinoma,2_TssAFlnk-Epithelial-Penis_Foreskin_Keratinocyte_Primary_Cells_skin02,5_TxWk-Blood_&_T-cell-CD3_Primary_Cel…	NBL1
chr1	19650599	19688581	pat_015	Loss	chr1	19688085	19688407	19688085	19688407	322	intronic	CAPZB	Toh_HAR234,Bird_HAR74	HAR_Merge50-00009	7_Enh-Brain-Brain_Mid_Frontal_Lobe,5_TxWk-Other-Fetal_Adrenal_Gland,5_TxWk-Digestive-Rectal_Mucosa.Donor_29,5_TxWk-HSC_&_B-cell-CD19_Primary_Cells_Peripheral_UW,5_TxWk-Digestive-Colonic_Mucosa,7_Enh-Blood_&_T-cell-CD4+_CD25-_Th_Primary_Cells,5_TxWk-ENCODE2012-HepG2_Hepatocellular_Carcinoma,2_TssAFlnk-Epithelial-Penis_Foreskin_Keratinocyte_Primary_Cells_skin02,5_TxWk-Blood_&_T-cell-CD3_Primary_Cel…	NBL1
chr1	19650599	19688581	pat_016	Loss	chr1	19688085	19688407	19688085	19688407	322	intronic	CAPZB	Toh_HAR234,Bird_HAR74	HAR_Merge50-00009	7_Enh-Brain-Brain_Mid_Frontal_Lobe,5_TxWk-Other-Fetal_Adrenal_Gland,5_TxWk-Digestive-Rectal_Mucosa.Donor_29,5_TxWk-HSC_&_B-cell-CD19_Primary_Cells_Peripheral_UW,5_TxWk-Digestive-Colonic_Mucosa,7_Enh-Blood_&_T-cell-CD4+_CD25-_Th_Primary_Cells,5_TxWk-ENCODE2012-HepG2_Hepatocellular_Carcinoma,2_TssAFlnk-Epithelial-Penis_Foreskin_Keratinocyte_Primary_Cells_skin02,5_TxWk-Blood_&_T-cell-CD3_Primary_Cel…	NBL1
chr1	19650959	19688432	pat_017	Loss	chr1	19688085	19688407	19688085	19688407	322	intronic	CAPZB	Toh_HAR234,Bird_HAR74	HAR_Merge50-00009	7_Enh-Brain-Brain_Mid_Frontal_Lobe,5_TxWk-Other-Fetal_Adrenal_Gland,5_TxWk-Digestive-Rectal_Mucosa.Donor_29,5_TxWk-HSC_&_B-cell-CD19_Primary_Cells_Peripheral_UW,5_TxWk-Digestive-Colonic_Mucosa,7_Enh-Blood_&_T-cell-CD4+_CD25-_Th_Primary_Cells,5_TxWk-ENCODE2012-HepG2_Hepatocellular_Carcinoma,2_TssAFlnk-Epithelial-Penis_Foreskin_Keratinocyte_Primary_Cells_skin02,5_TxWk-Blood_&_T-cell-CD3_Primary_Cel…	NBL1
chr1	19650959	19688432	pat_018	Loss	chr1	19688085	19688407	19688085	19688407	322	intronic	CAPZB	Toh_HAR234,Bird_HAR74	HAR_Merge50-00009	7_Enh-Brain-Brain_Mid_Frontal_Lobe,5_TxWk-Other-Fetal_Adrenal_Gland,5_TxWk-Digestive-Rectal_Mucosa.Donor_29,5_TxWk-HSC_&_B-cell-CD19_Primary_Cells_Peripheral_UW,5_TxWk-Digestive-Colonic_Mucosa,7_Enh-Blood_&_T-cell-CD4+_CD25-_Th_Primary_Cells,5_TxWk-ENCODE2012-HepG2_Hepatocellular_Carcinoma,2_TssAFlnk-Epithelial-Penis_Foreskin_Keratinocyte_Primary_Cells_skin02,5_TxWk-Blood_&_T-cell-CD3_Primary_Cel…	NBL1
chr1	19650959	19688432	pat_012	Loss	chr1	19688085	19688407	19688085	19688407	322	intronic	CAPZB	Toh_HAR234,Bird_HAR74	HAR_Merge50-00009	7_Enh-Brain-Brain_Mid_Frontal_Lobe,5_TxWk-Other-Fetal_Adrenal_Gland,5_TxWk-Digestive-Rectal_Mucosa.Donor_29,5_TxWk-HSC_&_B-cell-CD19_Primary_Cells_Peripheral_UW,5_TxWk-Digestive-Colonic_Mucosa,7_Enh-Blood_&_T-cell-CD4+_CD25-_Th_Primary_Cells,5_TxWk-ENCODE2012-HepG2_Hepatocellular_Carcinoma,2_TssAFlnk-Epithelial-Penis_Foreskin_Keratinocyte_Primary_Cells_skin02,5_TxWk-Blood_&_T-cell-CD3_Primary_Cel…	NBL1
chr1	19651124	19688461	pat_019	Loss	chr1	19688085	19688407	19688085	19688407	322	intronic	CAPZB	Toh_HAR234,Bird_HAR74	HAR_Merge50-00009	7_Enh-Brain-Brain_Mid_Frontal_Lobe,5_TxWk-Other-Fetal_Adrenal_Gland,5_TxWk-Digestive-Rectal_Mucosa.Donor_29,5_TxWk-HSC_&_B-cell-CD19_Primary_Cells_Peripheral_UW,5_TxWk-Digestive-Colonic_Mucosa,7_Enh-Blood_&_T-cell-CD4+_CD25-_Th_Primary_Cells,5_TxWk-ENCODE2012-HepG2_Hepatocellular_Carcinoma,2_TssAFlnk-Epithelial-Penis_Foreskin_Keratinocyte_Primary_Cells_skin02,5_TxWk-Blood_&_T-cell-CD3_Primary_Cel…	NBL1
chr1	19651124	19688461	pat_020	Loss	chr1	19688085	19688407	19688085	19688407	322	intronic	CAPZB	Toh_HAR234,Bird_HAR74	HAR_Merge50-00009	7_Enh-Brain-Brain_Mid_Frontal_Lobe,5_TxWk-Other-Fetal_Adrenal_Gland,5_TxWk-Digestive-Rectal_Mucosa.Donor_29,5_TxWk-HSC_&_B-cell-CD19_Primary_Cells_Peripheral_UW,5_TxWk-Digestive-Colonic_Mucosa,7_Enh-Blood_&_T-cell-CD4+_CD25-_Th_Primary_Cells,5_TxWk-ENCODE2012-HepG2_Hepatocellular_Carcinoma,2_TssAFlnk-Epithelial-Penis_Foreskin_Keratinocyte_Primary_Cells_skin02,5_TxWk-Blood_&_T-cell-CD3_Primary_Cel…	NBL1
chr1	19651124	19688461	pat_021	Loss	chr1	19688085	19688407	19688085	19688407	322	intronic	CAPZB	Toh_HAR234,Bird_HAR74	HAR_Merge50-00009	7_Enh-Brain-Brain_Mid_Frontal_Lobe,5_TxWk-Other-Fetal_Adrenal_Gland,5_TxWk-Digestive-Rectal_Mucosa.Donor_29,5_TxWk-HSC_&_B-cell-CD19_Primary_Cells_Peripheral_UW,5_TxWk-Digestive-Colonic_Mucosa,7_Enh-Blood_&_T-cell-CD4+_CD25-_Th_Primary_Cells,5_TxWk-ENCODE2012-HepG2_Hepatocellular_Carcinoma,2_TssAFlnk-Epithelial-Penis_Foreskin_Keratinocyte_Primary_Cells_skin02,5_TxWk-Blood_&_T-cell-CD3_Primary_Cel…	NBL1
chr1	19651124	19688461	pat_022	Loss	chr1	19688085	19688407	19688085	19688407	322	intronic	CAPZB	Toh_HAR234,Bird_HAR74	HAR_Merge50-00009	7_Enh-Brain-Brain_Mid_Frontal_Lobe,5_TxWk-Other-Fetal_Adrenal_Gland,5_TxWk-Digestive-Rectal_Mucosa.Donor_29,5_TxWk-HSC_&_B-cell-CD19_Primary_Cells_Peripheral_UW,5_TxWk-Digestive-Colonic_Mucosa,7_Enh-Blood_&_T-cell-CD4+_CD25-_Th_Primary_Cells,5_TxWk-ENCODE2012-HepG2_Hepatocellular_Carcinoma,2_TssAFlnk-Epithelial-Penis_Foreskin_Keratinocyte_Primary_Cells_skin02,5_TxWk-Blood_&_T-cell-CD3_Primary_Cel…	NBL1
chr1	19681419	19688581	pat_023	Loss	chr1	19688085	19688407	19688085	19688407	322	intronic	CAPZB	Toh_HAR234,Bird_HAR74	HAR_Merge50-00009	7_Enh-Brain-Brain_Mid_Frontal_Lobe,5_TxWk-Other-Fetal_Adrenal_Gland,5_TxWk-Digestive-Rectal_Mucosa.Donor_29,5_TxWk-HSC_&_B-cell-CD19_Primary_Cells_Peripheral_UW,5_TxWk-Digestive-Colonic_Mucosa,7_Enh-Blood_&_T-cell-CD4+_CD25-_Th_Primary_Cells,5_TxWk-ENCODE2012-HepG2_Hepatocellular_Carcinoma,2_TssAFlnk-Epithelial-Penis_Foreskin_Keratinocyte_Primary_Cells_skin02,5_TxWk-Blood_&_T-cell-CD3_Primary_Cel…	NBL1
chr1	19681419	19688581	pat_024	Loss	chr1	19688085	19688407	19688085	19688407	322	intronic	CAPZB	Toh_HAR234,Bird_HAR74	HAR_Merge50-00009	7_Enh-Brain-Brain_Mid_Frontal_Lobe,5_TxWk-Other-Fetal_Adrenal_Gland,5_TxWk-Digestive-Rectal_Mucosa.Donor_29,5_TxWk-HSC_&_B-cell-CD19_Primary_Cells_Peripheral_UW,5_TxWk-Digestive-Colonic_Mucosa,7_Enh-Blood_&_T-cell-CD4+_CD25-_Th_Primary_Cells,5_TxWk-ENCODE2012-HepG2_Hepatocellular_Carcinoma,2_TssAFlnk-Epithelial-Penis_Foreskin_Keratinocyte_Primary_Cells_skin02,5_TxWk-Blood_&_T-cell-CD3_Primary_Cel…	NBL1
chr1	19681419	19688581	pat_025	Loss	chr1	19688085	19688407	19688085	19688407	322	intronic	CAPZB	Toh_HAR234,Bird_HAR74	HAR_Merge50-00009	7_Enh-Brain-Brain_Mid_Frontal_Lobe,5_TxWk-Other-Fetal_Adrenal_Gland,5_TxWk-Digestive-Rectal_Mucosa.Donor_29,5_TxWk-HSC_&_B-cell-CD19_Primary_Cells_Peripheral_UW,5_TxWk-Digestive-Colonic_Mucosa,7_Enh-Blood_&_T-cell-CD4+_CD25-_Th_Primary_Cells,5_TxWk-ENCODE2012-HepG2_Hepatocellular_Carcinoma,2_TssAFlnk-Epithelial-Penis_Foreskin_Keratinocyte_Primary_Cells_skin02,5_TxWk-Blood_&_T-cell-CD3_Primary_Cel…	NBL1
chr1	23685036	23772954	pat_010	Gain	chr1	23761019	23761114	23761019	23761114	95	exonic	ASAP3	Toh_HAR423	HAR_Merge50-00011	15_Quies-Blood_&_T-cell-CD8_Naive_Primary_Cells,5_TxWk-Digestive-Rectal_Mucosa.Donor_29,4_Tx-Muscle-Fetal_Muscle_Leg,14_ReprPCWk-HSC_&_B-cell-CD19_Primary_Cells_Peripheral_UW,14_ReprPCWk-ENCODE2012-Dnd41_TCell_Leukemia,4_Tx-iPSC-iPS-20b_Cell_Line,14_ReprPCWk-ENCODE2012-Monocytes-CD14+_RO01746,4_Tx-Other-Placenta_Amnion,5_TxWk-ES-deriv-hESC_Derived_CD56+_Ectoderm_Cultured_Cells,5_TxWk-Epithelial-P…
chr1	27234029	27322849	pat_026	Loss	chr1	27309617	27309945	27309617	27309945	328	intergenic	C1orf172,TRNP1	Bird_HAR414	HAR_Merge50-00013	15_Quies-Blood_&_T-cell-CD8_Naive_Primary_Cells,14_ReprPCWk-Neurosph-Neurosphere_Cultured_Cells_Ganglionic_Eminence_Derived,13_ReprPC-Mesench-Bone_Marrow_Derived_Mesenchymal_Stem_Cell_Cultured_Cells,14_ReprPCWk-Muscle-Fetal_Muscle_Trunk,14_ReprPCWk-Digestive-Colonic_Mucosa,14_ReprPCWk-Brain-Brain_Germinal_Matrix,14_ReprPCWk-HSC_&_B-cell-CD19_Primary_Cells_Peripheral_UW,14_ReprPCWk-ENCODE2012-Dnd4…	TRNP1,FAM46B,SLC9A1
chr1	35072303	35119566	pat_010	Loss	chr1	35087404	35087631	35087404	35087631	227	intergenic	C1orf94,GJB5	Bird_HAR158	HAR_Merge50-00015	14_ReprPCWk-Neurosph-Neurosphere_Cultured_Cells_Ganglionic_Eminence_Derived,14_ReprPCWk-Blood_&_T-cell-CD8_Naive_Primary_Cells,15_Quies-ES-deriv-hESC_Derived_CD56+_Mesoderm_Cultured_Cells,14_ReprPCWk-Muscle-Fetal_Muscle_Trunk,14_ReprPCWk-ENCODE2012-Dnd41_TCell_Leukemia,15_Quies-Digestive-Esophagus,15_Quies-Other-Pancreas,15_Quies-Brain-Fetal_Brain_Female,15_Quies-ESC-ES-I3_Cell_Line,14_ReprPCWk-B…
chr1	37371614	37394358	pat_010	Gain	chr1	37392819	37393061	37392819	37393061	242	intronic	GRIK3	Bird_HAR468	HAR_Merge50-00016	15_Quies-Blood_&_T-cell-CD8_Naive_Primary_Cells,15_Quies-ES-deriv-hESC_Derived_CD56+_Mesoderm_Cultured_Cells,9_Het-Myosat-Muscle_Satellite_Cultured_Cells,14_ReprPCWk-Muscle-Fetal_Muscle_Trunk,14_ReprPCWk-Digestive-Colonic_Mucosa,14_ReprPCWk-Brain-Brain_Germinal_Matrix,14_ReprPCWk-HSC_&_B-cell-CD19_Primary_Cells_Peripheral_UW,15_Quies-Other-Pancreas,15_Quies-Digestive-Esophagus,15_Quies-Digestive-…
chr1	38444332	38448665	pat_027	Loss	chr1	38445273	38445621	38445273	38445621	348	intronic	SF3A3	Bird_HAR159	HAR_Merge50-00017	4_Tx-Muscle-Fetal_Muscle_Leg,4_Tx-ENCODE2012-A549_EtOH_0.02pct_Lung_Carcinoma,4_Tx-Blood_&_T-cell-CD4_Naive_Primary_Cells,4_Tx-iPSC-iPS-20b_Cell_Line,4_Tx-Other-Placenta_Amnion,4_Tx-Blood_&_T-cell-CD4+_CD25int_CD127+_Tmem_Primary_Cells,4_Tx-Blood_&_T-cell-CD4+_CD25-_CD45RA+_Naive_Primary_Cells,4_Tx-ESC-HUES48_Cell_Line,5_TxWk-ES-deriv-H1_BMP4_Derived_Mesendoderm_Cultured_Cells,4_Tx-Epithelial-Pen…	INPP5B
chr1	38667250	38807020	pat_010	Gain	chr1	38687906	38688256	38687906	38688256	350	intergenic	LOC339442,RRAGC	Toh_HAR177	HAR_Merge50-00019	14_ReprPCWk-Blood_&_T-cell-CD8_Naive_Primary_Cells,14_ReprPCWk-Digestive-Fetal_Intestine_Small,14_ReprPCWk-Digestive-Colonic_Mucosa,15_Quies-Digestive-Esophagus,14_ReprPCWk-ENCODE2012-Dnd41_TCell_Leukemia,15_Quies-Other-Pancreas,15_Quies-Brain-Fetal_Brain_Female,14_ReprPCWk-ENCODE2012-Monocytes-CD14+_RO01746,15_Quies-ES-deriv-H1_Derived_Neuronal_Progenitor_Cultured_Cells,15_Quies-Other-Adult_Live…
chr1	43258150	43286988	pat_010	Loss	chr1	43279007	43279219	43279007	43279219	212	intronic	CCDC23	Bird_HAR470	HAR_Merge50-00020	5_TxWk-Digestive-Rectal_Mucosa.Donor_29,4_Tx-Muscle-Fetal_Muscle_Leg,5_TxWk-Digestive-Colonic_Mucosa,5_TxWk-Heart-Left_Ventricle,5_TxWk-Blood_&_T-cell-CD4+_CD25-_CD45RA+_Naive_Primary_Cells,5_TxWk-Epithelial-Penis_Foreskin_Fibroblast_Primary_Cells_skin02,5_TxWk-Myosat-Muscle_Satellite_Cultured_Cells,5_TxWk-ENCODE2012-HepG2_Hepatocellular_Carcinoma,5_TxWk-Blood_&_T-cell-CD3_Primary_Cells_Cord_BI,5…	CCDC23,FLJ32224,SLC2A1
chr1	44472921	44486061	pat_010	Loss	chr1	44485147	44485404	44485147	44485404	257	intronic	SLC6A9	Bird_HAR471	HAR_Merge50-00021	7_Enh-Brain-Brain_Mid_Frontal_Lobe,15_Quies-Blood_&_T-cell-CD8_Naive_Primary_Cells,5_TxWk-Digestive-Rectal_Mucosa.Donor_29,5_TxWk-Digestive-Colonic_Mucosa,5_TxWk-Epithelial-Penis_Foreskin_Fibroblast_Primary_Cells_skin02,6_EnhG-Digestive-Fetal_Stomach,14_ReprPCWk-Muscle-Skeletal_Muscle_Male,5_TxWk-ENCODE2012-HepG2_Hepatocellular_Carcinoma,15_Quies-ENCODE2012-Monocytes-CD14+_RO01746,15_Quies-Thymus…	DMAP1
chr1	44475357	44486061	pat_026	Loss	chr1	44485147	44485404	44485147	44485404	257	intronic	SLC6A9	Bird_HAR471	HAR_Merge50-00021	7_Enh-Brain-Brain_Mid_Frontal_Lobe,15_Quies-Blood_&_T-cell-CD8_Naive_Primary_Cells,5_TxWk-Digestive-Rectal_Mucosa.Donor_29,5_TxWk-Digestive-Colonic_Mucosa,5_TxWk-Epithelial-Penis_Foreskin_Fibroblast_Primary_Cells_skin02,6_EnhG-Digestive-Fetal_Stomach,14_ReprPCWk-Muscle-Skeletal_Muscle_Male,5_TxWk-ENCODE2012-HepG2_Hepatocellular_Carcinoma,15_Quies-ENCODE2012-Monocytes-CD14+_RO01746,15_Quies-Thymus…	DMAP1
chr1	44698730	44743582	pat_010	Loss	chr1	44739747	44740177	44739747	44740177	430	intronic	ERI3	Toh_HAR492	HAR_Merge50-00022	15_Quies-Blood_&_T-cell-CD8_Naive_Primary_Cells,5_TxWk-Other-Fetal_Adrenal_Gland,5_TxWk-Digestive-Rectal_Mucosa.Donor_29,5_TxWk-HSC_&_B-cell-CD19_Primary_Cells_Peripheral_UW,4_Tx-Muscle-Fetal_Muscle_Leg,7_Enh-HSC_&_B-cell-CD15_Primary_Cells,7_Enh-Blood_&_T-cell-CD4+_CD25-_Th_Primary_Cells,7_Enh-ENCODE2012-Monocytes-CD14+_RO01746,6_EnhG-Blood_&_T-cell-CD3_Primary_Cells_Cord_BI,15_Quies-ESC-ES-I3_C…	RNF220
chr1	44814371	44945309	pat_010	Loss	chr1	44902152	44902427	44902152	44902427	275	intronic	RNF220	Bird_HAR472	HAR_Merge50-00023	7_Enh-Brain-Brain_Mid_Frontal_Lobe,15_Quies-Blood_&_T-cell-CD8_Naive_Primary_Cells,15_Quies-ES-deriv-hESC_Derived_CD56+_Mesoderm_Cultured_Cells,14_ReprPCWk-Muscle-Fetal_Muscle_Trunk,14_ReprPCWk-Brain-Brain_Germinal_Matrix,14_ReprPCWk-HSC_&_B-cell-CD19_Primary_Cells_Peripheral_UW,14_ReprPCWk-ENCODE2012-Dnd41_TCell_Leukemia,15_Quies-Digestive-Esophagus,15_Quies-Other-Pancreas,15_Quies-Muscle-Skelet…	RNF220,TMEM53,DMAP1
chr1	47033495	47098245	pat_010	Gain	chr1	47041775	47041795	47041775	47041795	20	intronic	MKNK1	Toh_HAR316	HAR_Merge50-00025	4_Tx-Muscle-Fetal_Muscle_Leg,5_TxWk-Digestive-Colonic_Mucosa,4_Tx-Blood_&_T-cell-CD4+_CD25int_CD127+_Tmem_Primary_Cells,5_TxWk-ENCODE2012-HepG2_Hepatocellular_Carcinoma,5_TxWk-Myosat-Muscle_Satellite_Cultured_Cells,4_Tx-Blood_&_T-cell-CD4+_CD25-_CD45RA+_Naive_Primary_Cells,5_TxWk-Brain-Fetal_Brain_Male,5_TxWk-ENCODE2012-Dnd41_TCell_Leukemia,4_Tx-Epithelial-Penis_Foreskin_Fibroblast_Primary_Cells_…
chr1	51090421	51185603	pat_010	Loss	chr1	51162457	51162883	51162457	51162883	426	intronic	FAF1	Bird_HAR475	HAR_Merge50-00030	15_Quies-Blood_&_T-cell-CD8_Naive_Primary_Cells,5_TxWk-Digestive-Rectal_Mucosa.Donor_29,15_Quies-ES-deriv-hESC_Derived_CD56+_Mesoderm_Cultured_Cells,5_TxWk-Heart-Left_Ventricle,15_Quies-Digestive-Esophagus,15_Quies-Muscle-Skeletal_Muscle_Female,15_Quies-Brain-Fetal_Brain_Female,15_Quies-ESC-ES-I3_Cell_Line,15_Quies-iPSC-iPS_DF_6.9_Cell_Line,15_Quies-Muscle-Skeletal_Muscle_Male,15_Quies-Epithelial…	CDKN2C
chr1	53757153	53868424	pat_010	Loss	chr1	53793546	53793584	53793546	53793584	38	exonic	LRP8	Toh_HAR169	HAR_Merge50-00031	1_TssA-Muscle-Skeletal_Muscle_Male,10_TssBiv-Epithelial-Penis_Foreskin_Keratinocyte_Primary_Cells_skin02,1_TssA-ES-deriv-H9_Derived_Neuronal_Progenitor_Cultured_Cells,1_TssA-ENCODE2012-Osteoblasts,1_TssA-ESC-ES-WA7_Cell_Line,1_TssA-Blood_&_T-cell-CD8_Naive_Primary_Cells,1_TssA-ENCODE2012-NHDF-Ad_Adult_Dermal_Fibroblasts,1_TssA-ES-deriv-hESC_Derived_CD56+_Mesoderm_Cultured_Cells,1_TssA-ES-deriv-H1…	AK097571,SLC25A3P1
chr1	53917079	54017705	pat_009	Gain	chr1	53992519	53992568	53992519	53992568	49	intronic	GLIS1	Toh_HAR236	HAR_Merge50-00032	15_Quies-Blood_&_T-cell-CD8_Naive_Primary_Cells,15_Quies-Digestive-Esophagus,14_ReprPCWk-ENCODE2012-Dnd41_TCell_Leukemia,15_Quies-Digestive-Rectal_Mucosa.Donor_29,15_Quies-Brain-Fetal_Brain_Female,5_TxWk-ES-deriv-hESC_Derived_CD56+_Ectoderm_Cultured_Cells,2_TssAFlnk-Epithelial-Penis_Foreskin_Fibroblast_Primary_Cells_skin01,15_Quies-ENCODE2012-A549_EtOH_0.02pct_Lung_Carcinoma,5_TxWk-Myosat-Muscle_…
chr1	53917079	54028434	pat_013	Gain	chr1	53992519	53992568	53992519	53992568	49	intronic	GLIS1	Toh_HAR236	HAR_Merge50-00032	15_Quies-Blood_&_T-cell-CD8_Naive_Primary_Cells,15_Quies-Digestive-Esophagus,14_ReprPCWk-ENCODE2012-Dnd41_TCell_Leukemia,15_Quies-Digestive-Rectal_Mucosa.Donor_29,15_Quies-Brain-Fetal_Brain_Female,5_TxWk-ES-deriv-hESC_Derived_CD56+_Ectoderm_Cultured_Cells,2_TssAFlnk-Epithelial-Penis_Foreskin_Fibroblast_Primary_Cells_skin01,15_Quies-ENCODE2012-A549_EtOH_0.02pct_Lung_Carcinoma,5_TxWk-Myosat-Muscle_…
chr1	53987347	54013942	pat_010	Gain	chr1	53992519	53992568	53992519	53992568	49	intronic	GLIS1	Toh_HAR236	HAR_Merge50-00032	15_Quies-Blood_&_T-cell-CD8_Naive_Primary_Cells,15_Quies-Digestive-Esophagus,14_ReprPCWk-ENCODE2012-Dnd41_TCell_Leukemia,15_Quies-Digestive-Rectal_Mucosa.Donor_29,15_Quies-Brain-Fetal_Brain_Female,5_TxWk-ES-deriv-hESC_Derived_CD56+_Ectoderm_Cultured_Cells,2_TssAFlnk-Epithelial-Penis_Foreskin_Fibroblast_Primary_Cells_skin01,15_Quies-ENCODE2012-A549_EtOH_0.02pct_Lung_Carcinoma,5_TxWk-Myosat-Muscle_…
chr1	56164448	56284015	pat_010	Loss	chr1	56204189	56204491	56204189	56204491	302	intergenic	MIR4422,PPAP2B	Bird_HAR476	HAR_Merge50-00033	15_Quies-Blood_&_T-cell-CD8_Naive_Primary_Cells,15_Quies-ES-deriv-hESC_Derived_CD56+_Mesoderm_Cultured_Cells,7_Enh-HSC_&_B-cell-CD15_Primary_Cells,14_ReprPCWk-HSC_&_B-cell-CD19_Primary_Cells_Peripheral_UW,15_Quies-Other-Pancreas,15_Quies-Digestive-Esophagus,15_Quies-Muscle-Skeletal_Muscle_Female,15_Quies-Digestive-Rectal_Mucosa.Donor_29,15_Quies-Brain-Fetal_Brain_Female,15_Quies-ESC-ES-I3_Cell_Li…	PPAP2B
chr1	56784082	56811108	pat_010	Loss	chr1	56789791	56789809	56789791	56789809	18	intergenic	MIR4422,PPAP2B	Toh_HAR289	HAR_Merge50-00034	15_Quies-Blood_&_T-cell-CD8_Naive_Primary_Cells,15_Quies-ES-deriv-hESC_Derived_CD56+_Mesoderm_Cultured_Cells,5_TxWk-Heart-Left_Ventricle,15_Quies-Digestive-Esophagus,15_Quies-Other-Pancreas,15_Quies-Digestive-Rectal_Mucosa.Donor_29,15_Quies-Brain-Fetal_Brain_Female,15_Quies-ESC-ES-I3_Cell_Line,15_Quies-Muscle-Skeletal_Muscle_Male,15_Quies-iPSC-iPS_DF_6.9_Cell_Line,15_Quies-Epithelial-Penis_Foresk…
chr1	58062495	58066869	pat_010	Loss	chr1	58066513	58066615	58066513	58066615	102	intronic	DAB1	Pollard_HAR100	HAR_Merge50-00037	15_Quies-Blood_&_T-cell-CD8_Naive_Primary_Cells,14_ReprPCWk-Muscle-Fetal_Muscle_Trunk,14_ReprPCWk-ENCODE2012-Dnd41_TCell_Leukemia,15_Quies-Other-Pancreas,15_Quies-Digestive-Esophagus,15_Quies-Muscle-Skeletal_Muscle_Female,15_Quies-Digestive-Rectal_Mucosa.Donor_29,15_Quies-Brain-Fetal_Brain_Female,14_ReprPCWk-Blood_&_T-cell-CD4+_CD25-_IL17-_PMA-Ionomycin_stimulated_MACS_purified_Th_Primary_Cells,1…
chr1	58066880	58076122	pat_010	Gain	chr1	58069320	58069593	58069320	58069593	273	intronic	DAB1	Bird_HAR160	HAR_Merge50-00038	15_Quies-Blood_&_T-cell-CD8_Naive_Primary_Cells,15_Quies-ES-deriv-hESC_Derived_CD56+_Mesoderm_Cultured_Cells,14_ReprPCWk-Muscle-Fetal_Muscle_Trunk,14_ReprPCWk-ENCODE2012-Dnd41_TCell_Leukemia,15_Quies-Other-Pancreas,15_Quies-Digestive-Esophagus,15_Quies-Muscle-Skeletal_Muscle_Female,15_Quies-Digestive-Rectal_Mucosa.Donor_29,15_Quies-Brain-Fetal_Brain_Female,14_ReprPCWk-Blood_&_T-cell-CD4+_CD25-_IL…
chr1	58111007	58130048	pat_010	Gain	chr1	58124925	58125112	58124925	58125112	187	intronic	DAB1	Bird_HAR479	HAR_Merge50-00039	9_Het-Epithelial-Penis_Foreskin_Fibroblast_Primary_Cells_skin02,15_Quies-Blood_&_T-cell-CD8_Naive_Primary_Cells,15_Quies-ES-deriv-hESC_Derived_CD56+_Mesoderm_Cultured_Cells,15_Quies-Digestive-Esophagus,15_Quies-Other-Pancreas,15_Quies-Muscle-Skeletal_Muscle_Female,15_Quies-Digestive-Rectal_Mucosa.Donor_29,15_Quies-Brain-Fetal_Brain_Female,15_Quies-ESC-ES-I3_Cell_Line,15_Quies-Muscle-Skeletal_Musc…
chr1	59525570	71600905	pat_028	Loss	chr1	61449355	61449489	61449355	61449489	134	intergenic	C1orf87,NFIA	Pollard_HAR30,Toh_HAR137,BUSH_HAR43	HAR_Merge50-00041	15_Quies-Blood_&_T-cell-CD8_Naive_Primary_Cells,15_Quies-Other-Pancreas,15_Quies-Digestive-Esophagus,15_Quies-Digestive-Rectal_Mucosa.Donor_29,15_Quies-Brain-Fetal_Brain_Female,15_Quies-ESC-ES-I3_Cell_Line,7_Enh-ENCODE2012-K562_Leukemia,15_Quies-iPSC-iPS_DF_6.9_Cell_Line,15_Quies-Epithelial-Penis_Foreskin_Melanocyte_Primary_Cells_skin01,15_Quies-ENCODE2012-A549_EtOH_0.02pct_Lung_Carcinoma,5_TxWk-…	NFIA
chr1	59525570	71600905	pat_028	Loss	chr1	61637623	61637898	61637623	61637898	275	intronic	NFIA	Bird_HAR480	HAR_Merge50-00042	7_Enh-Heart-Aorta,7_Enh-Brain-Brain_Mid_Frontal_Lobe,15_Quies-Blood_&_T-cell-CD8_Naive_Primary_Cells,5_TxWk-Digestive-Rectal_Mucosa.Donor_29,15_Quies-ES-deriv-hESC_Derived_CD56+_Mesoderm_Cultured_Cells,14_ReprPCWk-HSC_&_B-cell-CD19_Primary_Cells_Peripheral_UW,15_Quies-ESC-ES-I3_Cell_Line,15_Quies-iPSC-iPS_DF_6.9_Cell_Line,5_TxWk-ENCODE2012-HepG2_Hepatocellular_Carcinoma,15_Quies-ENCODE2012-Monocy…
chr1	59525570	71600905	pat_028	Loss	chr1	61710908	61711108	61710908	61711108	200	intronic	NFIA	Prabhakar_HAR748	HAR_Merge50-00043	15_Quies-Blood_&_T-cell-CD8_Naive_Primary_Cells,5_TxWk-Other-Fetal_Adrenal_Gland,15_Quies-ES-deriv-hESC_Derived_CD56+_Mesoderm_Cultured_Cells,5_TxWk-Digestive-Colonic_Mucosa,5_TxWk-Heart-Left_Ventricle,15_Quies-Digestive-Esophagus,15_Quies-Digestive-Rectal_Mucosa.Donor_29,5_TxWk-Epithelial-Penis_Foreskin_Fibroblast_Primary_Cells_skin02,15_Quies-iPSC-iPS_DF_6.9_Cell_Line,15_Quies-Epithelial-Penis_…
chr1	59525570	71600905	pat_028	Loss	chr1	61762704	61763185	61762704	61763185	481	intronic	NFIA	Bird_HAR161	HAR_Merge50-00044	15_Quies-Blood_&_T-cell-CD8_Naive_Primary_Cells,15_Quies-ES-deriv-hESC_Derived_CD56+_Mesoderm_Cultured_Cells,5_TxWk-Heart-Left_Ventricle,15_Quies-Muscle-Skeletal_Muscle_Female,15_Quies-Digestive-Rectal_Mucosa.Donor_29,15_Quies-Brain-Fetal_Brain_Female,15_Quies-Muscle-Skeletal_Muscle_Male,15_Quies-Epithelial-Penis_Foreskin_Melanocyte_Primary_Cells_skin01,5_TxWk-Myosat-Muscle_Satellite_Cultured_Cel…
chr1	59525570	71600905	pat_028	Loss	chr1	61989781	61990098	61989781	61990098	317	intergenic	NFIA,MGC34796	Bird_HAR481	HAR_Merge50-00045	15_Quies-Blood_&_T-cell-CD8_Naive_Primary_Cells,7_Enh-ENCODE2012-A549_EtOH_0.02pct_Lung_Carcinoma,15_Quies-ES-deriv-hESC_Derived_CD56+_Mesoderm_Cultured_Cells,15_Quies-Other-Pancreas,15_Quies-Digestive-Esophagus,15_Quies-Muscle-Skeletal_Muscle_Female,15_Quies-Digestive-Rectal_Mucosa.Donor_29,15_Quies-Brain-Fetal_Brain_Female,15_Quies-ESC-ES-I3_Cell_Line,15_Quies-iPSC-iPS_DF_6.9_Cell_Line,15_Quies…
chr1	59525570	71600905	pat_028	Loss	chr1	63464549	63465539	63464549	63465539	990	intergenic	ATG4C,LINC00466	Bird_HAR162	HAR_Merge50-00046	15_Quies-Blood_&_T-cell-CD8_Naive_Primary_Cells,15_Quies-ES-deriv-hESC_Derived_CD56+_Mesoderm_Cultured_Cells,14_ReprPCWk-Digestive-Colonic_Mucosa,14_ReprPCWk-Muscle-Fetal_Muscle_Trunk,13_ReprPC-Thymus-Fetal_Thymus,14_ReprPCWk-HSC_&_B-cell-CD19_Primary_Cells_Peripheral_UW,15_Quies-Digestive-Esophagus,15_Quies-Other-Pancreas,14_ReprPCWk-ENCODE2012-Dnd41_TCell_Leukemia,15_Quies-Brain-Fetal_Brain_Fem…
chr1	59525570	71600905	pat_028	Loss	chr1	64254385	64254693	64254385	64254693	308	intronic	ROR1	Bird_HAR482	HAR_Merge50-00048	7_Enh-Heart-Aorta,15_Quies-Blood_&_T-cell-CD8_Naive_Primary_Cells,5_TxWk-Heart-Left_Ventricle,14_ReprPCWk-ENCODE2012-Dnd41_TCell_Leukemia,15_Quies-Brain-Fetal_Brain_Female,7_Enh-Digestive-Esophagus,5_TxWk-Epithelial-Penis_Foreskin_Fibroblast_Primary_Cells_skin02,15_Quies-Epithelial-Penis_Foreskin_Melanocyte_Primary_Cells_skin01,15_Quies-ENCODE2012-Monocytes-CD14+_RO01746,5_TxWk-Myosat-Muscle_Sate…
chr1	59525570	71600905	pat_028	Loss	chr1	64590698	64591196	64590698	64591196	498	intronic	ROR1	Prabhakar_HAR354	HAR_Merge50-00049	7_Enh-Heart-Aorta,15_Quies-Blood_&_T-cell-CD8_Naive_Primary_Cells,15_Quies-ES-deriv-hESC_Derived_CD56+_Mesoderm_Cultured_Cells,14_ReprPCWk-ENCODE2012-Dnd41_TCell_Leukemia,15_Quies-Other-Pancreas,15_Quies-Digestive-Esophagus,15_Quies-Muscle-Skeletal_Muscle_Female,15_Quies-Digestive-Rectal_Mucosa.Donor_29,15_Quies-Brain-Fetal_Brain_Female,15_Quies-ESC-ES-I3_Cell_Line,5_TxWk-Epithelial-Penis_Foreski…
chr1	59525570	71600905	pat_028	Loss	chr1	65015854	65016150	65015854	65016150	296	intronic	CACHD1	Prabhakar_HAR737	HAR_Merge50-00050	5_TxWk-Other-Fetal_Adrenal_Gland,7_Enh-Blood_&_T-cell-CD4+_CD25-_Th_Primary_Cells,14_ReprPCWk-ENCODE2012-Dnd41_TCell_Leukemia,15_Quies-Digestive-Esophagus,15_Quies-Muscle-Skeletal_Muscle_Female,15_Quies-Digestive-Rectal_Mucosa.Donor_29,15_Quies-Brain-Fetal_Brain_Female,5_TxWk-ES-deriv-hESC_Derived_CD56+_Ectoderm_Cultured_Cells,15_Quies-Epithelial-Penis_Foreskin_Melanocyte_Primary_Cells_skin01,15_…
chr1	59525570	71600905	pat_028	Loss	chr1	65543192	65543318	65543192	65543318	126	intergenic	MIR101-1,AK4	Bird_HAR483	HAR_Merge50-00051	15_Quies-Blood_&_T-cell-CD8_Naive_Primary_Cells,15_Quies-ES-deriv-hESC_Derived_CD56+_Mesoderm_Cultured_Cells,15_Quies-Other-Pancreas,15_Quies-Digestive-Esophagus,15_Quies-Muscle-Skeletal_Muscle_Female,15_Quies-Digestive-Rectal_Mucosa.Donor_29,15_Quies-Brain-Fetal_Brain_Female,15_Quies-ESC-ES-I3_Cell_Line,15_Quies-iPSC-iPS_DF_6.9_Cell_Line,15_Quies-Muscle-Skeletal_Muscle_Male,15_Quies-Epithelial-P…
chr1	59525570	71600905	pat_028	Loss	chr1	70080277	70080410	70080277	70080410	133	intergenic	DEPDC1,LRRC7	Prabhakar_HAR143	HAR_Merge50-00052	15_Quies-Blood_&_T-cell-CD8_Naive_Primary_Cells,15_Quies-ES-deriv-hESC_Derived_CD56+_Mesoderm_Cultured_Cells,15_Quies-Other-Pancreas,15_Quies-Digestive-Esophagus,15_Quies-Muscle-Skeletal_Muscle_Female,15_Quies-Digestive-Rectal_Mucosa.Donor_29,15_Quies-ESC-ES-I3_Cell_Line,15_Quies-Muscle-Skeletal_Muscle_Male,15_Quies-iPSC-iPS_DF_6.9_Cell_Line,15_Quies-Epithelial-Penis_Foreskin_Melanocyte_Primary_C…
chr1	59525570	71600905	pat_028	Loss	chr1	63553532	63553789	63553532	63553789	257	intergenic	ATG4C,LINC00466	Prabhakar_HAR635	HAR_Merge50-00047	14_ReprPCWk-Blood_&_T-cell-CD8_Naive_Primary_Cells,14_ReprPCWk-Muscle-Fetal_Muscle_Trunk,15_Quies-Other-Pancreas,14_ReprPCWk-ENCODE2012-Dnd41_TCell_Leukemia,15_Quies-Digestive-Esophagus,15_Quies-Digestive-Rectal_Mucosa.Donor_29,15_Quies-Brain-Fetal_Brain_Female,14_ReprPCWk-ENCODE2012-Monocytes-CD14+_RO01746,14_ReprPCWk-Blood_&_T-cell-CD4+_CD25-_IL17-_PMA-Ionomycin_stimulated_MACS_purified_Th_Prim…
chr1	61628318	61647785	pat_010	Loss	chr1	61637623	61637898	61637623	61637898	275	intronic	NFIA	Bird_HAR480	HAR_Merge50-00042	7_Enh-Heart-Aorta,7_Enh-Brain-Brain_Mid_Frontal_Lobe,15_Quies-Blood_&_T-cell-CD8_Naive_Primary_Cells,5_TxWk-Digestive-Rectal_Mucosa.Donor_29,15_Quies-ES-deriv-hESC_Derived_CD56+_Mesoderm_Cultured_Cells,14_ReprPCWk-HSC_&_B-cell-CD19_Primary_Cells_Peripheral_UW,15_Quies-ESC-ES-I3_Cell_Line,15_Quies-iPSC-iPS_DF_6.9_Cell_Line,5_TxWk-ENCODE2012-HepG2_Hepatocellular_Carcinoma,15_Quies-ENCODE2012-Monocy…
chr1	61756641	61776259	pat_010	Gain	chr1	61762704	61763185	61762704	61763185	481	intronic	NFIA	Bird_HAR161	HAR_Merge50-00044	15_Quies-Blood_&_T-cell-CD8_Naive_Primary_Cells,15_Quies-ES-deriv-hESC_Derived_CD56+_Mesoderm_Cultured_Cells,5_TxWk-Heart-Left_Ventricle,15_Quies-Muscle-Skeletal_Muscle_Female,15_Quies-Digestive-Rectal_Mucosa.Donor_29,15_Quies-Brain-Fetal_Brain_Female,15_Quies-Muscle-Skeletal_Muscle_Male,15_Quies-Epithelial-Penis_Foreskin_Melanocyte_Primary_Cells_skin01,5_TxWk-Myosat-Muscle_Satellite_Cultured_Cel…
chr1	61906317	62062942	pat_010	Gain	chr1	61989781	61990098	61989781	61990098	317	intergenic	NFIA,MGC34796	Bird_HAR481	HAR_Merge50-00045	15_Quies-Blood_&_T-cell-CD8_Naive_Primary_Cells,7_Enh-ENCODE2012-A549_EtOH_0.02pct_Lung_Carcinoma,15_Quies-ES-deriv-hESC_Derived_CD56+_Mesoderm_Cultured_Cells,15_Quies-Other-Pancreas,15_Quies-Digestive-Esophagus,15_Quies-Muscle-Skeletal_Muscle_Female,15_Quies-Digestive-Rectal_Mucosa.Donor_29,15_Quies-Brain-Fetal_Brain_Female,15_Quies-ESC-ES-I3_Cell_Line,15_Quies-iPSC-iPS_DF_6.9_Cell_Line,15_Quies…
chr1	63447209	63529605	pat_010	Loss	chr1	63464549	63465539	63464549	63465539	990	intergenic	ATG4C,LINC00466	Bird_HAR162	HAR_Merge50-00046	15_Quies-Blood_&_T-cell-CD8_Naive_Primary_Cells,15_Quies-ES-deriv-hESC_Derived_CD56+_Mesoderm_Cultured_Cells,14_ReprPCWk-Digestive-Colonic_Mucosa,14_ReprPCWk-Muscle-Fetal_Muscle_Trunk,13_ReprPC-Thymus-Fetal_Thymus,14_ReprPCWk-HSC_&_B-cell-CD19_Primary_Cells_Peripheral_UW,15_Quies-Digestive-Esophagus,15_Quies-Other-Pancreas,14_ReprPCWk-ENCODE2012-Dnd41_TCell_Leukemia,15_Quies-Brain-Fetal_Brain_Fem…
chr1	64583552	64596766	pat_010	Loss	chr1	64590698	64591196	64590698	64591196	498	intronic	ROR1	Prabhakar_HAR354	HAR_Merge50-00049	7_Enh-Heart-Aorta,15_Quies-Blood_&_T-cell-CD8_Naive_Primary_Cells,15_Quies-ES-deriv-hESC_Derived_CD56+_Mesoderm_Cultured_Cells,14_ReprPCWk-ENCODE2012-Dnd41_TCell_Leukemia,15_Quies-Other-Pancreas,15_Quies-Digestive-Esophagus,15_Quies-Muscle-Skeletal_Muscle_Female,15_Quies-Digestive-Rectal_Mucosa.Donor_29,15_Quies-Brain-Fetal_Brain_Female,15_Quies-ESC-ES-I3_Cell_Line,5_TxWk-Epithelial-Penis_Foreski…
chr1	65010678	65018578	pat_010	Loss	chr1	65015854	65016150	65015854	65016150	296	intronic	CACHD1	Prabhakar_HAR737	HAR_Merge50-00050	5_TxWk-Other-Fetal_Adrenal_Gland,7_Enh-Blood_&_T-cell-CD4+_CD25-_Th_Primary_Cells,14_ReprPCWk-ENCODE2012-Dnd41_TCell_Leukemia,15_Quies-Digestive-Esophagus,15_Quies-Muscle-Skeletal_Muscle_Female,15_Quies-Digestive-Rectal_Mucosa.Donor_29,15_Quies-Brain-Fetal_Brain_Female,5_TxWk-ES-deriv-hESC_Derived_CD56+_Ectoderm_Cultured_Cells,15_Quies-Epithelial-Penis_Foreskin_Melanocyte_Primary_Cells_skin01,15_…
chr1	65541639	65551083	pat_010	Loss	chr1	65543192	65543318	65543192	65543318	126	intergenic	MIR101-1,AK4	Bird_HAR483	HAR_Merge50-00051	15_Quies-Blood_&_T-cell-CD8_Naive_Primary_Cells,15_Quies-ES-deriv-hESC_Derived_CD56+_Mesoderm_Cultured_Cells,15_Quies-Other-Pancreas,15_Quies-Digestive-Esophagus,15_Quies-Muscle-Skeletal_Muscle_Female,15_Quies-Digestive-Rectal_Mucosa.Donor_29,15_Quies-Brain-Fetal_Brain_Female,15_Quies-ESC-ES-I3_Cell_Line,15_Quies-iPSC-iPS_DF_6.9_Cell_Line,15_Quies-Muscle-Skeletal_Muscle_Male,15_Quies-Epithelial-P…
chr1	70014478	70095750	pat_010	Gain	chr1	70080277	70080410	70080277	70080410	133	intergenic	DEPDC1,LRRC7	Prabhakar_HAR143	HAR_Merge50-00052	15_Quies-Blood_&_T-cell-CD8_Naive_Primary_Cells,15_Quies-ES-deriv-hESC_Derived_CD56+_Mesoderm_Cultured_Cells,15_Quies-Other-Pancreas,15_Quies-Digestive-Esophagus,15_Quies-Muscle-Skeletal_Muscle_Female,15_Quies-Digestive-Rectal_Mucosa.Donor_29,15_Quies-ESC-ES-I3_Cell_Line,15_Quies-Muscle-Skeletal_Muscle_Male,15_Quies-iPSC-iPS_DF_6.9_Cell_Line,15_Quies-Epithelial-Penis_Foreskin_Melanocyte_Primary_C…
chr1	70064544	70116586	pat_027	Loss	chr1	70080277	70080410	70080277	70080410	133	intergenic	DEPDC1,LRRC7	Prabhakar_HAR143	HAR_Merge50-00052	15_Quies-Blood_&_T-cell-CD8_Naive_Primary_Cells,15_Quies-ES-deriv-hESC_Derived_CD56+_Mesoderm_Cultured_Cells,15_Quies-Other-Pancreas,15_Quies-Digestive-Esophagus,15_Quies-Muscle-Skeletal_Muscle_Female,15_Quies-Digestive-Rectal_Mucosa.Donor_29,15_Quies-ESC-ES-I3_Cell_Line,15_Quies-Muscle-Skeletal_Muscle_Male,15_Quies-iPSC-iPS_DF_6.9_Cell_Line,15_Quies-Epithelial-Penis_Foreskin_Melanocyte_Primary_C…
chr1	70078543	70080378	pat_029	Gain	chr1	70080277	70080410	70080277	70080378	101	intergenic	DEPDC1,LRRC7	Prabhakar_HAR143	HAR_Merge50-00052	15_Quies-Blood_&_T-cell-CD8_Naive_Primary_Cells,15_Quies-ES-deriv-hESC_Derived_CD56+_Mesoderm_Cultured_Cells,15_Quies-Other-Pancreas,15_Quies-Digestive-Esophagus,15_Quies-Muscle-Skeletal_Muscle_Female,15_Quies-Digestive-Rectal_Mucosa.Donor_29,15_Quies-ESC-ES-I3_Cell_Line,15_Quies-Muscle-Skeletal_Muscle_Male,15_Quies-iPSC-iPS_DF_6.9_Cell_Line,15_Quies-Epithelial-Penis_Foreskin_Melanocyte_Primary_C…
chr1	71650258	71689479	pat_030	Loss	chr1	71662614	71663043	71662614	71663043	429	ncRNA_intronic	ZRANB2-AS2	Bird_HAR484	HAR_Merge50-00053	15_Quies-Blood_&_T-cell-CD8_Naive_Primary_Cells,15_Quies-ES-deriv-hESC_Derived_CD56+_Mesoderm_Cultured_Cells,15_Quies-Other-Pancreas,15_Quies-Digestive-Esophagus,15_Quies-Digestive-Rectal_Mucosa.Donor_29,15_Quies-Muscle-Skeletal_Muscle_Female,15_Quies-Brain-Fetal_Brain_Female,15_Quies-ESC-ES-I3_Cell_Line,15_Quies-Muscle-Skeletal_Muscle_Male,15_Quies-iPSC-iPS_DF_6.9_Cell_Line,15_Quies-Epithelial-P…
chr1	71650258	71721817	pat_010	Loss	chr1	71662614	71663043	71662614	71663043	429	ncRNA_intronic	ZRANB2-AS2	Bird_HAR484	HAR_Merge50-00053	15_Quies-Blood_&_T-cell-CD8_Naive_Primary_Cells,15_Quies-ES-deriv-hESC_Derived_CD56+_Mesoderm_Cultured_Cells,15_Quies-Other-Pancreas,15_Quies-Digestive-Esophagus,15_Quies-Digestive-Rectal_Mucosa.Donor_29,15_Quies-Muscle-Skeletal_Muscle_Female,15_Quies-Brain-Fetal_Brain_Female,15_Quies-ESC-ES-I3_Cell_Line,15_Quies-Muscle-Skeletal_Muscle_Male,15_Quies-iPSC-iPS_DF_6.9_Cell_Line,15_Quies-Epithelial-P…
chr1	72217976	72271385	pat_010	Gain	chr1	72253981	72254260	72253981	72254260	279	intronic	NEGR1	Bird_HAR485	HAR_Merge50-00054	15_Quies-Blood_&_T-cell-CD8_Naive_Primary_Cells,15_Quies-ES-deriv-hESC_Derived_CD56+_Mesoderm_Cultured_Cells,15_Quies-Other-Pancreas,15_Quies-Digestive-Esophagus,15_Quies-Digestive-Rectal_Mucosa.Donor_29,15_Quies-Muscle-Skeletal_Muscle_Female,15_Quies-Brain-Fetal_Brain_Female,15_Quies-ESC-ES-I3_Cell_Line,15_Quies-iPSC-iPS_DF_6.9_Cell_Line,15_Quies-Muscle-Skeletal_Muscle_Male,15_Quies-Epithelial-P…
chr1	74513165	74586215	pat_010	Loss	chr1	74534555	74534670	74534555	74534670	115	intronic	LRRIQ3	Bird_HAR487	HAR_Merge50-00057	15_Quies-Blood_&_T-cell-CD8_Naive_Primary_Cells,15_Quies-ES-deriv-hESC_Derived_CD56+_Mesoderm_Cultured_Cells,15_Quies-Other-Pancreas,15_Quies-Digestive-Esophagus,15_Quies-Muscle-Skeletal_Muscle_Female,15_Quies-Digestive-Rectal_Mucosa.Donor_29,15_Quies-Brain-Fetal_Brain_Female,15_Quies-ESC-ES-I3_Cell_Line,15_Quies-iPSC-iPS_DF_6.9_Cell_Line,15_Quies-Muscle-Skeletal_Muscle_Male,15_Quies-Epithelial-P…
chr1	75157989	75175664	pat_010	Loss	chr1	75160269	75160478	75160269	75160478	209	intergenic	C1orf173,CRYZ	Bird_HAR488	HAR_Merge50-00058	15_Quies-Blood_&_T-cell-CD8_Naive_Primary_Cells,15_Quies-ES-deriv-hESC_Derived_CD56+_Mesoderm_Cultured_Cells,15_Quies-Digestive-Esophagus,15_Quies-Other-Pancreas,15_Quies-Muscle-Skeletal_Muscle_Female,15_Quies-Digestive-Rectal_Mucosa.Donor_29,15_Quies-Brain-Fetal_Brain_Female,15_Quies-ESC-ES-I3_Cell_Line,15_Quies-iPSC-iPS_DF_6.9_Cell_Line,15_Quies-Muscle-Skeletal_Muscle_Male,15_Quies-Epithelial-P…
chr1	79476816	79487220	pat_010	Gain	chr1	79486285	79486624	79486285	79486624	339	intergenic	ELTD1,NONE	Bird_HAR164	HAR_Merge50-00061	15_Quies-Blood_&_T-cell-CD8_Naive_Primary_Cells,15_Quies-ES-deriv-hESC_Derived_CD56+_Mesoderm_Cultured_Cells,15_Quies-Digestive-Esophagus,15_Quies-Other-Pancreas,15_Quies-Muscle-Skeletal_Muscle_Female,15_Quies-Digestive-Rectal_Mucosa.Donor_29,15_Quies-Brain-Fetal_Brain_Female,15_Quies-ESC-ES-I3_Cell_Line,15_Quies-Muscle-Skeletal_Muscle_Male,15_Quies-iPSC-iPS_DF_6.9_Cell_Line,15_Quies-Epithelial-P…
chr1	80866671	80957648	pat_010	Loss	chr1	80919103	80919231	80919103	80919231	128	intergenic	ELTD1,LPHN2	Bird_HAR489	HAR_Merge50-00063	15_Quies-Blood_&_T-cell-CD8_Naive_Primary_Cells,15_Quies-ES-deriv-hESC_Derived_CD56+_Mesoderm_Cultured_Cells,15_Quies-Digestive-Esophagus,15_Quies-Other-Pancreas,15_Quies-Digestive-Rectal_Mucosa.Donor_29,15_Quies-Muscle-Skeletal_Muscle_Female,15_Quies-Brain-Fetal_Brain_Female,15_Quies-ESC-ES-I3_Cell_Line,15_Quies-Muscle-Skeletal_Muscle_Male,15_Quies-iPSC-iPS_DF_6.9_Cell_Line,15_Quies-Epithelial-P…
chr1	81324832	81418834	pat_010	Loss	chr1	81373873	81373993	81373873	81373993	120	intergenic	ELTD1,LPHN2	Prabhakar_HAR543	HAR_Merge50-00065	15_Quies-Blood_&_T-cell-CD8_Naive_Primary_Cells,15_Quies-ES-deriv-hESC_Derived_CD56+_Mesoderm_Cultured_Cells,15_Quies-Other-Pancreas,15_Quies-Digestive-Esophagus,15_Quies-Muscle-Skeletal_Muscle_Female,15_Quies-Digestive-Rectal_Mucosa.Donor_29,15_Quies-Brain-Fetal_Brain_Female,15_Quies-ESC-ES-I3_Cell_Line,15_Quies-iPSC-iPS_DF_6.9_Cell_Line,15_Quies-Muscle-Skeletal_Muscle_Male,15_Quies-Epithelial-P…
chr1	81453333	81495741	pat_010	Loss	chr1	81494086	81494421	81494086	81494421	335	intergenic	ELTD1,LPHN2	Prabhakar_HAR703	HAR_Merge50-00066	15_Quies-Blood_&_T-cell-CD8_Naive_Primary_Cells,15_Quies-ES-deriv-hESC_Derived_CD56+_Mesoderm_Cultured_Cells,15_Quies-Digestive-Esophagus,15_Quies-Other-Pancreas,15_Quies-Muscle-Skeletal_Muscle_Female,15_Quies-Digestive-Rectal_Mucosa.Donor_29,15_Quies-Brain-Fetal_Brain_Female,15_Quies-ESC-ES-I3_Cell_Line,15_Quies-iPSC-iPS_DF_6.9_Cell_Line,15_Quies-Muscle-Skeletal_Muscle_Male,15_Quies-Epithelial-P…
chr1	81603515	81639696	pat_010	Loss	chr1	81623752	81623890	81623752	81623890	138	intergenic	NONE,LPHN2	Toh_HAR212	HAR_Merge50-00067	15_Quies-Blood_&_T-cell-CD8_Naive_Primary_Cells,15_Quies-ES-deriv-hESC_Derived_CD56+_Mesoderm_Cultured_Cells,15_Quies-Other-Pancreas,15_Quies-Digestive-Esophagus,15_Quies-Muscle-Skeletal_Muscle_Female,15_Quies-Digestive-Rectal_Mucosa.Donor_29,15_Quies-Brain-Fetal_Brain_Female,15_Quies-ESC-ES-I3_Cell_Line,5_TxWk-ES-deriv-hESC_Derived_CD56+_Ectoderm_Cultured_Cells,15_Quies-iPSC-iPS_DF_6.9_Cell_Line…
chr1	81666040	81760493	pat_010	Gain	chr1	81669024	81669153	81669024	81669153	129	intergenic	NONE,LPHN2	Bird_HAR490	HAR_Merge50-00068	15_Quies-Blood_&_T-cell-CD8_Naive_Primary_Cells,15_Quies-ES-deriv-hESC_Derived_CD56+_Mesoderm_Cultured_Cells,15_Quies-Digestive-Esophagus,15_Quies-Other-Pancreas,15_Quies-Muscle-Skeletal_Muscle_Female,15_Quies-Digestive-Rectal_Mucosa.Donor_29,15_Quies-Brain-Fetal_Brain_Female,15_Quies-Muscle-Skeletal_Muscle_Male,15_Quies-iPSC-iPS_DF_6.9_Cell_Line,15_Quies-Epithelial-Penis_Foreskin_Melanocyte_Prim…
chr1	82052341	82073276	pat_010	Gain	chr1	82064452	82064819	82064452	82064819	367	intergenic	NONE,LPHN2	Prabhakar_HAR571	HAR_Merge50-00069	15_Quies-Blood_&_T-cell-CD8_Naive_Primary_Cells,15_Quies-ES-deriv-hESC_Derived_CD56+_Mesoderm_Cultured_Cells,15_Quies-Digestive-Esophagus,15_Quies-Other-Pancreas,15_Quies-Muscle-Skeletal_Muscle_Female,15_Quies-Digestive-Rectal_Mucosa.Donor_29,15_Quies-Brain-Fetal_Brain_Female,15_Quies-ESC-ES-I3_Cell_Line,15_Quies-Muscle-Skeletal_Muscle_Male,15_Quies-iPSC-iPS_DF_6.9_Cell_Line,15_Quies-Epithelial-P…
chr1	82379475	82591599	pat_010	Loss	chr1	82497621	82497755	82497621	82497755	134	intergenic	LPHN2,MIR548AP	BUSH_HAR34,Bird_HAR76,Toh_HAR25	HAR_Merge50-00070	15_Quies-Blood_&_T-cell-CD8_Naive_Primary_Cells,15_Quies-ES-deriv-hESC_Derived_CD56+_Mesoderm_Cultured_Cells,15_Quies-Digestive-Esophagus,15_Quies-Other-Pancreas,15_Quies-Digestive-Rectal_Mucosa.Donor_29,15_Quies-Muscle-Skeletal_Muscle_Female,15_Quies-Brain-Fetal_Brain_Female,15_Quies-ESC-ES-I3_Cell_Line,15_Quies-Muscle-Skeletal_Muscle_Male,15_Quies-iPSC-iPS_DF_6.9_Cell_Line,15_Quies-Epithelial-P…
chr1	83437199	83491336	pat_010	Gain	chr1	83451695	83451955	83451695	83451955	260	intergenic	LPHN2,MIR548AP	Bird_HAR166	HAR_Merge50-00074	15_Quies-Blood_&_T-cell-CD8_Naive_Primary_Cells,15_Quies-ES-deriv-hESC_Derived_CD56+_Mesoderm_Cultured_Cells,15_Quies-Digestive-Esophagus,15_Quies-Other-Pancreas,15_Quies-Muscle-Skeletal_Muscle_Female,15_Quies-Digestive-Rectal_Mucosa.Donor_29,15_Quies-Brain-Fetal_Brain_Female,15_Quies-ESC-ES-I3_Cell_Line,15_Quies-iPSC-iPS_DF_6.9_Cell_Line,15_Quies-Muscle-Skeletal_Muscle_Male,15_Quies-Epithelial-P…
chr1	83870279	83875023	pat_031	Gain	chr1	83871362	83871911	83871362	83871911	549	intergenic	LPHN2,MIR548AP	Bird_HAR77	HAR_Merge50-00075	15_Quies-Blood_&_T-cell-CD8_Naive_Primary_Cells,15_Quies-ES-deriv-hESC_Derived_CD56+_Mesoderm_Cultured_Cells,15_Quies-Digestive-Esophagus,15_Quies-Other-Pancreas,15_Quies-Muscle-Skeletal_Muscle_Female,15_Quies-Digestive-Rectal_Mucosa.Donor_29,15_Quies-Brain-Fetal_Brain_Female,15_Quies-ESC-ES-I3_Cell_Line,15_Quies-iPSC-iPS_DF_6.9_Cell_Line,15_Quies-Muscle-Skeletal_Muscle_Male,15_Quies-Epithelial-P…
chr1	83955621	84094207	pat_010	Gain	chr1	83969385	83969759	83969385	83969759	374	intergenic	LPHN2,MIR548AP	Bird_HAR167	HAR_Merge50-00076	15_Quies-Blood_&_T-cell-CD8_Naive_Primary_Cells,15_Quies-ES-deriv-hESC_Derived_CD56+_Mesoderm_Cultured_Cells,5_TxWk-Heart-Left_Ventricle,5_TxWk-Blood_&_T-cell-CD4+_CD25-_CD45RA+_Naive_Primary_Cells,15_Quies-Digestive-Esophagus,15_Quies-Muscle-Skeletal_Muscle_Female,15_Quies-Digestive-Rectal_Mucosa.Donor_29,15_Quies-Brain-Fetal_Brain_Female,15_Quies-ESC-ES-I3_Cell_Line,15_Quies-iPSC-iPS_DF_6.9_Cel…
chr1	84206863	84214121	pat_032	Loss	chr1	84211470	84211971	84211470	84211971	501	intergenic	LPHN2,MIR548AP	Bird_HAR492	HAR_Merge50-00077	15_Quies-Blood_&_T-cell-CD8_Naive_Primary_Cells,15_Quies-Digestive-Esophagus,15_Quies-Other-Pancreas,15_Quies-Muscle-Skeletal_Muscle_Female,15_Quies-Digestive-Rectal_Mucosa.Donor_29,15_Quies-Brain-Fetal_Brain_Female,15_Quies-ESC-ES-I3_Cell_Line,5_TxWk-ES-deriv-hESC_Derived_CD56+_Ectoderm_Cultured_Cells,15_Quies-iPSC-iPS_DF_6.9_Cell_Line,15_Quies-Muscle-Skeletal_Muscle_Male,15_Quies-Epithelial-Pen…
chr1	87819837	87973636	pat_010	Gain	chr1	87835463	87835856	87835463	87835856	393	ncRNA_intronic	LOC100505768	Bird_HAR168	HAR_Merge50-00078	15_Quies-Blood_&_T-cell-CD8_Naive_Primary_Cells,15_Quies-Digestive-Esophagus,15_Quies-Other-Pancreas,15_Quies-Muscle-Skeletal_Muscle_Female,15_Quies-Digestive-Rectal_Mucosa.Donor_29,15_Quies-Brain-Fetal_Brain_Female,15_Quies-iPSC-iPS_DF_6.9_Cell_Line,15_Quies-Muscle-Skeletal_Muscle_Male,15_Quies-Epithelial-Penis_Foreskin_Melanocyte_Primary_Cells_skin01,15_Quies-ENCODE2012-A549_EtOH_0.02pct_Lung_C…	LMO4
chr1	88606681	88618366	pat_010	Gain	chr1	88615792	88616583	88615792	88616583	791	intergenic	LOC100505768,PKN2	Toh_HAR97	HAR_Merge50-00083	14_ReprPCWk-Blood_&_T-cell-CD8_Naive_Primary_Cells,15_Quies-ES-deriv-hESC_Derived_CD56+_Mesoderm_Cultured_Cells,14_ReprPCWk-ENCODE2012-Dnd41_TCell_Leukemia,15_Quies-Other-Pancreas,15_Quies-Digestive-Esophagus,15_Quies-Muscle-Skeletal_Muscle_Female,15_Quies-Digestive-Rectal_Mucosa.Donor_29,15_Quies-ESC-ES-I3_Cell_Line,15_Quies-iPSC-iPS_DF_6.9_Cell_Line,15_Quies-Muscle-Skeletal_Muscle_Male,15_Quies…
chr1	88620062	88705919	pat_010	Loss	chr1	88624258	88624624	88624258	88624624	366	intergenic	LOC100505768,PKN2	Bird_HAR493	HAR_Merge50-00084	14_ReprPCWk-Blood_&_T-cell-CD8_Naive_Primary_Cells,15_Quies-ES-deriv-hESC_Derived_CD56+_Mesoderm_Cultured_Cells,14_ReprPCWk-ENCODE2012-Dnd41_TCell_Leukemia,15_Quies-Other-Pancreas,15_Quies-Digestive-Esophagus,15_Quies-Muscle-Skeletal_Muscle_Female,15_Quies-Digestive-Rectal_Mucosa.Donor_29,15_Quies-Brain-Fetal_Brain_Female,15_Quies-ESC-ES-I3_Cell_Line,15_Quies-iPSC-iPS_DF_6.9_Cell_Line,15_Quies-Mu…
chr1	88620062	88705919	pat_010	Loss	chr1	88645430	88645630	88645430	88645630	200	intergenic	LOC100505768,PKN2	Pollard_HAR107	HAR_Merge50-00085	15_Quies-Blood_&_T-cell-CD8_Naive_Primary_Cells,7_Enh-ENCODE2012-A549_EtOH_0.02pct_Lung_Carcinoma,15_Quies-Other-Pancreas,15_Quies-Digestive-Esophagus,14_ReprPCWk-ENCODE2012-Dnd41_TCell_Leukemia,15_Quies-Digestive-Rectal_Mucosa.Donor_29,15_Quies-Muscle-Skeletal_Muscle_Female,15_Quies-Brain-Fetal_Brain_Female,14_ReprPCWk-Blood_&_T-cell-CD4+_CD25-_IL17-_PMA-Ionomycin_stimulated_MACS_purified_Th_Pri…
chr1	91203791	91289140	pat_033	Gain	chr1	91286398	91286754	91286398	91286754	356	intergenic	BARHL2,ZNF644	Bird_HAR495	HAR_Merge50-00088	15_Quies-ES-deriv-hESC_Derived_CD56+_Mesoderm_Cultured_Cells,14_ReprPCWk-Muscle-Fetal_Muscle_Trunk,14_ReprPCWk-HSC_&_B-cell-CD19_Primary_Cells_Peripheral_UW,15_Quies-Sm._Muscle-Duodenum_Smooth_Muscle,15_Quies-Other-Spleen,15_Quies-Brain-Brain_Mid_Frontal_Lobe,15_Quies-Sm._Muscle-Rectal_Smooth_Muscle,15_Quies-iPSC-iPS-20b_Cell_Line,14_ReprPCWk-Heart-Left_Ventricle,14_ReprPCWk-HSC_&_B-cell-CD14_Pri…
chr1	95709394	95746765	pat_010	Loss	chr1	95732748	95732962	95732748	95732962	214	intergenic	RWDD3,FLJ31662	Bird_HAR496	HAR_Merge50-00089	15_Quies-ES-deriv-hESC_Derived_CD56+_Mesoderm_Cultured_Cells,15_Quies-Other-Pancreas,15_Quies-Digestive-Rectal_Mucosa.Donor_29,15_Quies-Sm._Muscle-Duodenum_Smooth_Muscle,15_Quies-Other-Spleen,15_Quies-Brain-Brain_Mid_Frontal_Lobe,14_ReprPCWk-Mesench-Bone_Marrow_Derived_Mesenchymal_Stem_Cell_Cultured_Cells,15_Quies-Sm._Muscle-Rectal_Smooth_Muscle,15_Quies-ENCODE2012-HeLa-S3_Cervical_Carcinoma,15_Q…	BC067883,7SK
chr1	95746765	95757160	pat_010	Gain	chr1	95746874	95747329	95746874	95747329	455	intergenic	RWDD3,FLJ31662	Bird_HAR497,Prabhakar_HAR297	HAR_Merge50-00090	15_Quies-ES-deriv-hESC_Derived_CD56+_Mesoderm_Cultured_Cells,15_Quies-Other-Pancreas,15_Quies-Digestive-Rectal_Mucosa.Donor_29,15_Quies-Sm._Muscle-Duodenum_Smooth_Muscle,15_Quies-Other-Spleen,15_Quies-Brain-Brain_Mid_Frontal_Lobe,14_ReprPCWk-Mesench-Bone_Marrow_Derived_Mesenchymal_Stem_Cell_Cultured_Cells,15_Quies-Sm._Muscle-Rectal_Smooth_Muscle,15_Quies-ENCODE2012-HeLa-S3_Cervical_Carcinoma,15_Q…
chr1	95774432	95864057	pat_010	Gain	chr1	95806901	95807307	95806901	95807307	406	intergenic	RWDD3,FLJ31662	BUSH_HAR57	HAR_Merge50-00091	14_ReprPCWk-Neurosph-Neurosphere_Cultured_Cells_Ganglionic_Eminence_Derived,15_Quies-ES-deriv-hESC_Derived_CD56+_Mesoderm_Cultured_Cells,14_ReprPCWk-ENCODE2012-Dnd41_TCell_Leukemia,15_Quies-Other-Pancreas,15_Quies-Digestive-Rectal_Mucosa.Donor_29,15_Quies-Sm._Muscle-Duodenum_Smooth_Muscle,15_Quies-Other-Spleen,15_Quies-Brain-Brain_Mid_Frontal_Lobe,15_Quies-Sm._Muscle-Rectal_Smooth_Muscle,15_Quies…
chr1	98605731	98629572	pat_010	Gain	chr1	98623229	98623400	98623229	98623400	171	intergenic	MIR137HG,LOC729987	Prabhakar_HAR537	HAR_Merge50-00096	15_Quies-ES-deriv-hESC_Derived_CD56+_Mesoderm_Cultured_Cells,15_Quies-Other-Pancreas,15_Quies-Digestive-Rectal_Mucosa.Donor_29,15_Quies-Sm._Muscle-Duodenum_Smooth_Muscle,15_Quies-Other-Spleen,15_Quies-Brain-Brain_Mid_Frontal_Lobe,15_Quies-Sm._Muscle-Rectal_Smooth_Muscle,15_Quies-ENCODE2012-HeLa-S3_Cervical_Carcinoma,15_Quies-HSC_&_B-cell-CD14_Primary_Cells,15_Quies-iPSC-iPS-20b_Cell_Line,15_Quies…
chr1	101466890	101495551	pat_010	Gain	chr1	101490453	101490621	101490453	101490621	168	intronic	DPH5	Bird_HAR430	HAR_Merge50-00097	2_TssAFlnk-Brain-Brain_Mid_Frontal_Lobe,5_TxWk-Heart-Left_Ventricle,7_Enh-HSC_&_B-cell-CD15_Primary_Cells,1_TssA-ES-deriv-hESC_Derived_CD56+_Mesoderm_Cultured_Cells,2_TssAFlnk-ENCODE2012-K562_Leukemia,2_TssAFlnk-Adipose-Adipose_Nuclei,2_TssAFlnk-Epithelial-Penis_Foreskin_Fibroblast_Primary_Cells_skin01,1_TssA-iPSC-iPS-15b_Cell_Line,7_Enh-Other-Adult_Liver,2_TssAFlnk-iPSC-iPS-18_Cell_Line,15_Quies…	S1PR1
chr1	101620122	101622225	pat_034	Loss	chr1	101620918	101621057	101620918	101621057	139	intergenic	DPH5,S1PR1	Bird_HAR431,Prabhakar_HAR107	HAR_Merge50-00098	15_Quies-ES-deriv-hESC_Derived_CD56+_Mesoderm_Cultured_Cells,5_TxWk-Heart-Left_Ventricle,15_Quies-Other-Pancreas,15_Quies-Digestive-Rectal_Mucosa.Donor_29,15_Quies-Sm._Muscle-Duodenum_Smooth_Muscle,15_Quies-Other-Spleen,15_Quies-Brain-Brain_Mid_Frontal_Lobe,15_Quies-Sm._Muscle-Rectal_Smooth_Muscle,15_Quies-ENCODE2012-HeLa-S3_Cervical_Carcinoma,15_Quies-HSC_&_B-cell-CD14_Primary_Cells,15_Quies-iPS…
chr1	102500393	102610274	pat_010	Gain	chr1	102540132	102540261	102540132	102540261	129	intergenic	OLFM3,COL11A1	Bird_HAR148	HAR_Merge50-00100	15_Quies-ES-deriv-hESC_Derived_CD56+_Mesoderm_Cultured_Cells,15_Quies-Other-Pancreas,15_Quies-Digestive-Rectal_Mucosa.Donor_29,15_Quies-Sm._Muscle-Duodenum_Smooth_Muscle,15_Quies-Other-Spleen,15_Quies-Brain-Brain_Mid_Frontal_Lobe,15_Quies-Sm._Muscle-Rectal_Smooth_Muscle,15_Quies-ENCODE2012-HeLa-S3_Cervical_Carcinoma,15_Quies-HSC_&_B-cell-CD14_Primary_Cells,15_Quies-iPSC-iPS-20b_Cell_Line,15_Quies…
chr1	106801724	106895727	pat_010	Loss	chr1	106895326	106895640	106895326	106895640	314	intergenic	NONE,PRMT6	Prabhakar_HAR824	HAR_Merge50-00103	15_Quies-ES-deriv-hESC_Derived_CD56+_Mesoderm_Cultured_Cells,15_Quies-Other-Pancreas,15_Quies-Digestive-Rectal_Mucosa.Donor_29,15_Quies-Sm._Muscle-Duodenum_Smooth_Muscle,15_Quies-Other-Spleen,15_Quies-Brain-Brain_Mid_Frontal_Lobe,15_Quies-Sm._Muscle-Rectal_Smooth_Muscle,15_Quies-ENCODE2012-HeLa-S3_Cervical_Carcinoma,15_Quies-HSC_&_B-cell-CD14_Primary_Cells,15_Quies-iPSC-iPS-20b_Cell_Line,15_Quies…
chr1	107141664	107260478	pat_010	Gain	chr1	107219174	107219474	107219174	107219474	300	intergenic	NONE,PRMT6	Bird_HAR386	HAR_Merge50-00104	15_Quies-ES-deriv-hESC_Derived_CD56+_Mesoderm_Cultured_Cells,15_Quies-Other-Pancreas,15_Quies-Digestive-Rectal_Mucosa.Donor_29,5_TxWk-Epithelial-Penis_Foreskin_Fibroblast_Primary_Cells_skin02,15_Quies-Sm._Muscle-Duodenum_Smooth_Muscle,15_Quies-Other-Spleen,15_Quies-Brain-Brain_Mid_Frontal_Lobe,15_Quies-Sm._Muscle-Rectal_Smooth_Muscle,15_Quies-ENCODE2012-HeLa-S3_Cervical_Carcinoma,15_Quies-HSC_&_B…	PRMT6
chr1	107217314	107222333	pat_034	Loss	chr1	107219174	107219474	107219174	107219474	300	intergenic	NONE,PRMT6	Bird_HAR386	HAR_Merge50-00104	15_Quies-ES-deriv-hESC_Derived_CD56+_Mesoderm_Cultured_Cells,15_Quies-Other-Pancreas,15_Quies-Digestive-Rectal_Mucosa.Donor_29,5_TxWk-Epithelial-Penis_Foreskin_Fibroblast_Primary_Cells_skin02,15_Quies-Sm._Muscle-Duodenum_Smooth_Muscle,15_Quies-Other-Spleen,15_Quies-Brain-Brain_Mid_Frontal_Lobe,15_Quies-Sm._Muscle-Rectal_Smooth_Muscle,15_Quies-ENCODE2012-HeLa-S3_Cervical_Carcinoma,15_Quies-HSC_&_B…	PRMT6
chr1	116348426	116379388	pat_010	Gain	chr1	116369228	116369338	116369228	116369338	110	intergenic	CASQ2,NHLH2	Pollard_HAR130	HAR_Merge50-00105	14_ReprPCWk-Neurosph-Neurosphere_Cultured_Cells_Ganglionic_Eminence_Derived,12_EnhBiv-ES-deriv-hESC_Derived_CD56+_Ectoderm_Cultured_Cells,15_Quies-ES-deriv-hESC_Derived_CD56+_Mesoderm_Cultured_Cells,14_ReprPCWk-Digestive-Colonic_Mucosa,14_ReprPCWk-Muscle-Fetal_Muscle_Trunk,15_Quies-Other-Pancreas,13_ReprPC-Digestive-Rectal_Mucosa.Donor_29,13_ReprPC-IMR90-IMR90_Cell_Line,15_Quies-Other-Spleen,13_R…	SLC22A15
chr1	116844587	116879679	pat_010	Loss	chr1	116854478	116854683	116854478	116854683	205	intergenic	MAB21L3,ATP1A1	Bird_HAR149,Prabhakar_HAR10	HAR_Merge50-00106	15_Quies-ES-deriv-hESC_Derived_CD56+_Mesoderm_Cultured_Cells,5_TxWk-Blood_&_T-cell-CD4+_CD25-_CD45RA+_Naive_Primary_Cells,14_ReprPCWk-HSC_&_B-cell-CD19_Primary_Cells_Peripheral_UW,15_Quies-Digestive-Rectal_Mucosa.Donor_29,5_TxWk-ES-deriv-hESC_Derived_CD56+_Ectoderm_Cultured_Cells,7_Enh-Digestive-Esophagus,5_TxWk-Blood_&_T-cell-CD3_Primary_Cells_Cord_BI,15_Quies-Sm._Muscle-Duodenum_Smooth_Muscle,1…
chr1	119267524	119283196	pat_021	Loss	chr1	119279491	119279507	119279491	119279507	16	intergenic	SPAG17,TBX15	Toh_HAR151	HAR_Merge50-00107	15_Quies-ES-deriv-hESC_Derived_CD56+_Mesoderm_Cultured_Cells,15_Quies-Other-Pancreas,15_Quies-Digestive-Rectal_Mucosa.Donor_29,15_Quies-Sm._Muscle-Duodenum_Smooth_Muscle,15_Quies-Other-Spleen,15_Quies-Brain-Brain_Mid_Frontal_Lobe,15_Quies-Sm._Muscle-Rectal_Smooth_Muscle,15_Quies-ENCODE2012-HeLa-S3_Cervical_Carcinoma,15_Quies-HSC_&_B-cell-CD14_Primary_Cells,15_Quies-iPSC-iPS-20b_Cell_Line,15_Quies…
chr1	119595935	119683877	pat_010	Loss	chr1	119675658	119675931	119675658	119675931	273	intronic	WARS2	Bird_HAR150	HAR_Merge50-00108	5_TxWk-Heart-Left_Ventricle,15_Quies-Other-Pancreas,15_Quies-Digestive-Rectal_Mucosa.Donor_29,5_TxWk-Blood_&_T-cell-CD3_Primary_Cells_Cord_BI,15_Quies-Sm._Muscle-Duodenum_Smooth_Muscle,15_Quies-Other-Spleen,15_Quies-Brain-Brain_Mid_Frontal_Lobe,15_Quies-Sm._Muscle-Rectal_Smooth_Muscle,15_Quies-HSC_&_B-cell-CD14_Primary_Cells,15_Quies-iPSC-iPS-20b_Cell_Line,15_Quies-HSC_&_B-cell-CD15_Primary_Cells…	WARS2
chr1	120032644	120186442	pat_010	Gain	chr1	120139471	120139726	120139471	120139726	255	downstream	LINC00622	Bird_HAR434	HAR_Merge50-00109	15_Quies-ES-deriv-hESC_Derived_CD56+_Mesoderm_Cultured_Cells,15_Quies-Other-Pancreas,15_Quies-Digestive-Rectal_Mucosa.Donor_29,15_Quies-Sm._Muscle-Duodenum_Smooth_Muscle,15_Quies-Other-Spleen,14_ReprPCWk-Mesench-Bone_Marrow_Derived_Mesenchymal_Stem_Cell_Cultured_Cells,15_Quies-Sm._Muscle-Rectal_Smooth_Muscle,15_Quies-HSC_&_B-cell-CD14_Primary_Cells,15_Quies-iPSC-iPS-20b_Cell_Line,15_Quies-ESC-ES-…
chr1	120129342	120156408	pat_035	Gain	chr1	120139471	120139726	120139471	120139726	255	downstream	LINC00622	Bird_HAR434	HAR_Merge50-00109	15_Quies-ES-deriv-hESC_Derived_CD56+_Mesoderm_Cultured_Cells,15_Quies-Other-Pancreas,15_Quies-Digestive-Rectal_Mucosa.Donor_29,15_Quies-Sm._Muscle-Duodenum_Smooth_Muscle,15_Quies-Other-Spleen,14_ReprPCWk-Mesench-Bone_Marrow_Derived_Mesenchymal_Stem_Cell_Cultured_Cells,15_Quies-Sm._Muscle-Rectal_Smooth_Muscle,15_Quies-HSC_&_B-cell-CD14_Primary_Cells,15_Quies-iPSC-iPS-20b_Cell_Line,15_Quies-ESC-ES-…
chr1	143992446	144342778	pat_036	Gain	chr1	144340516	144340754	144340516	144340754	238	ncRNA_exonic	LINC00623,LOC728875	Bird_HAR435	HAR_Merge50-00110	15_Quies-ES-deriv-hESC_Derived_CD56+_Mesoderm_Cultured_Cells,15_Quies-Other-Pancreas,15_Quies-Digestive-Rectal_Mucosa.Donor_29,15_Quies-Sm._Muscle-Duodenum_Smooth_Muscle,15_Quies-Other-Spleen,15_Quies-Brain-Brain_Mid_Frontal_Lobe,15_Quies-Sm._Muscle-Rectal_Smooth_Muscle,15_Quies-ENCODE2012-HeLa-S3_Cervical_Carcinoma,15_Quies-HSC_&_B-cell-CD14_Primary_Cells,15_Quies-iPSC-iPS-20b_Cell_Line,15_Quies…
chr1	144086911	144352893	pat_037	Gain	chr1	144340516	144340754	144340516	144340754	238	ncRNA_exonic	LINC00623,LOC728875	Bird_HAR435	HAR_Merge50-00110	15_Quies-ES-deriv-hESC_Derived_CD56+_Mesoderm_Cultured_Cells,15_Quies-Other-Pancreas,15_Quies-Digestive-Rectal_Mucosa.Donor_29,15_Quies-Sm._Muscle-Duodenum_Smooth_Muscle,15_Quies-Other-Spleen,15_Quies-Brain-Brain_Mid_Frontal_Lobe,15_Quies-Sm._Muscle-Rectal_Smooth_Muscle,15_Quies-ENCODE2012-HeLa-S3_Cervical_Carcinoma,15_Quies-HSC_&_B-cell-CD14_Primary_Cells,15_Quies-iPSC-iPS-20b_Cell_Line,15_Quies…
chr1	144279309	144462929	pat_038	Gain	chr1	144340516	144340754	144340516	144340754	238	ncRNA_exonic	LINC00623,LOC728875	Bird_HAR435	HAR_Merge50-00110	15_Quies-ES-deriv-hESC_Derived_CD56+_Mesoderm_Cultured_Cells,15_Quies-Other-Pancreas,15_Quies-Digestive-Rectal_Mucosa.Donor_29,15_Quies-Sm._Muscle-Duodenum_Smooth_Muscle,15_Quies-Other-Spleen,15_Quies-Brain-Brain_Mid_Frontal_Lobe,15_Quies-Sm._Muscle-Rectal_Smooth_Muscle,15_Quies-ENCODE2012-HeLa-S3_Cervical_Carcinoma,15_Quies-HSC_&_B-cell-CD14_Primary_Cells,15_Quies-iPSC-iPS-20b_Cell_Line,15_Quies…
chr1	144279309	144527177	pat_039	Gain	chr1	144340516	144340754	144340516	144340754	238	ncRNA_exonic	LINC00623,LOC728875	Bird_HAR435	HAR_Merge50-00110	15_Quies-ES-deriv-hESC_Derived_CD56+_Mesoderm_Cultured_Cells,15_Quies-Other-Pancreas,15_Quies-Digestive-Rectal_Mucosa.Donor_29,15_Quies-Sm._Muscle-Duodenum_Smooth_Muscle,15_Quies-Other-Spleen,15_Quies-Brain-Brain_Mid_Frontal_Lobe,15_Quies-Sm._Muscle-Rectal_Smooth_Muscle,15_Quies-ENCODE2012-HeLa-S3_Cervical_Carcinoma,15_Quies-HSC_&_B-cell-CD14_Primary_Cells,15_Quies-iPSC-iPS-20b_Cell_Line,15_Quies…
chr1	144279309	144527177	pat_039	Gain	chr1	144520764	144521012	144520764	144521012	248	ncRNA_exonic	LOC728875	Bird_HAR34	HAR_Merge50-00111	1_TssA-ES-deriv-H9_Derived_Neuronal_Progenitor_Cultured_Cells,10_TssBiv-ENCODE2012-A549_EtOH_0.02pct_Lung_Carcinoma,1_TssA-ENCODE2012-Osteoblasts,1_TssA-ES-deriv-hESC_Derived_CD56+_Mesoderm_Cultured_Cells,1_TssA-ES-deriv-H1_Derived_Mesenchymal_Stem_Cells,1_TssA-ES-deriv-H1_BMP4_Derived_Trophoblast_Cultured_Cells,1_TssA-iPSC-iPS-15b_Cell_Line,1_TssA-Other-Placenta_Amnion,15_Quies-Other-Spleen,1_Ts…
chr1	144307124	144352893	pat_040	Gain	chr1	144340516	144340754	144340516	144340754	238	ncRNA_exonic	LINC00623,LOC728875	Bird_HAR435	HAR_Merge50-00110	15_Quies-ES-deriv-hESC_Derived_CD56+_Mesoderm_Cultured_Cells,15_Quies-Other-Pancreas,15_Quies-Digestive-Rectal_Mucosa.Donor_29,15_Quies-Sm._Muscle-Duodenum_Smooth_Muscle,15_Quies-Other-Spleen,15_Quies-Brain-Brain_Mid_Frontal_Lobe,15_Quies-Sm._Muscle-Rectal_Smooth_Muscle,15_Quies-ENCODE2012-HeLa-S3_Cervical_Carcinoma,15_Quies-HSC_&_B-cell-CD14_Primary_Cells,15_Quies-iPSC-iPS-20b_Cell_Line,15_Quies…
chr1	144335888	144342778	pat_015	Gain	chr1	144340516	144340754	144340516	144340754	238	ncRNA_exonic	LINC00623,LOC728875	Bird_HAR435	HAR_Merge50-00110	15_Quies-ES-deriv-hESC_Derived_CD56+_Mesoderm_Cultured_Cells,15_Quies-Other-Pancreas,15_Quies-Digestive-Rectal_Mucosa.Donor_29,15_Quies-Sm._Muscle-Duodenum_Smooth_Muscle,15_Quies-Other-Spleen,15_Quies-Brain-Brain_Mid_Frontal_Lobe,15_Quies-Sm._Muscle-Rectal_Smooth_Muscle,15_Quies-ENCODE2012-HeLa-S3_Cervical_Carcinoma,15_Quies-HSC_&_B-cell-CD14_Primary_Cells,15_Quies-iPSC-iPS-20b_Cell_Line,15_Quies…
chr1	144336554	144342785	pat_041	Gain	chr1	144340516	144340754	144340516	144340754	238	ncRNA_exonic	LINC00623,LOC728875	Bird_HAR435	HAR_Merge50-00110	15_Quies-ES-deriv-hESC_Derived_CD56+_Mesoderm_Cultured_Cells,15_Quies-Other-Pancreas,15_Quies-Digestive-Rectal_Mucosa.Donor_29,15_Quies-Sm._Muscle-Duodenum_Smooth_Muscle,15_Quies-Other-Spleen,15_Quies-Brain-Brain_Mid_Frontal_Lobe,15_Quies-Sm._Muscle-Rectal_Smooth_Muscle,15_Quies-ENCODE2012-HeLa-S3_Cervical_Carcinoma,15_Quies-HSC_&_B-cell-CD14_Primary_Cells,15_Quies-iPSC-iPS-20b_Cell_Line,15_Quies…
chr1	144336554	144342785	pat_042	Gain	chr1	144340516	144340754	144340516	144340754	238	ncRNA_exonic	LINC00623,LOC728875	Bird_HAR435	HAR_Merge50-00110	15_Quies-ES-deriv-hESC_Derived_CD56+_Mesoderm_Cultured_Cells,15_Quies-Other-Pancreas,15_Quies-Digestive-Rectal_Mucosa.Donor_29,15_Quies-Sm._Muscle-Duodenum_Smooth_Muscle,15_Quies-Other-Spleen,15_Quies-Brain-Brain_Mid_Frontal_Lobe,15_Quies-Sm._Muscle-Rectal_Smooth_Muscle,15_Quies-ENCODE2012-HeLa-S3_Cervical_Carcinoma,15_Quies-HSC_&_B-cell-CD14_Primary_Cells,15_Quies-iPSC-iPS-20b_Cell_Line,15_Quies…
chr1	144336554	144352893	pat_031	Gain	chr1	144340516	144340754	144340516	144340754	238	ncRNA_exonic	LINC00623,LOC728875	Bird_HAR435	HAR_Merge50-00110	15_Quies-ES-deriv-hESC_Derived_CD56+_Mesoderm_Cultured_Cells,15_Quies-Other-Pancreas,15_Quies-Digestive-Rectal_Mucosa.Donor_29,15_Quies-Sm._Muscle-Duodenum_Smooth_Muscle,15_Quies-Other-Spleen,15_Quies-Brain-Brain_Mid_Frontal_Lobe,15_Quies-Sm._Muscle-Rectal_Smooth_Muscle,15_Quies-ENCODE2012-HeLa-S3_Cervical_Carcinoma,15_Quies-HSC_&_B-cell-CD14_Primary_Cells,15_Quies-iPSC-iPS-20b_Cell_Line,15_Quies…
chr1	144336554	144352893	pat_043	Gain	chr1	144340516	144340754	144340516	144340754	238	ncRNA_exonic	LINC00623,LOC728875	Bird_HAR435	HAR_Merge50-00110	15_Quies-ES-deriv-hESC_Derived_CD56+_Mesoderm_Cultured_Cells,15_Quies-Other-Pancreas,15_Quies-Digestive-Rectal_Mucosa.Donor_29,15_Quies-Sm._Muscle-Duodenum_Smooth_Muscle,15_Quies-Other-Spleen,15_Quies-Brain-Brain_Mid_Frontal_Lobe,15_Quies-Sm._Muscle-Rectal_Smooth_Muscle,15_Quies-ENCODE2012-HeLa-S3_Cervical_Carcinoma,15_Quies-HSC_&_B-cell-CD14_Primary_Cells,15_Quies-iPSC-iPS-20b_Cell_Line,15_Quies…
chr1	144336554	144352893	pat_044	Gain	chr1	144340516	144340754	144340516	144340754	238	ncRNA_exonic	LINC00623,LOC728875	Bird_HAR435	HAR_Merge50-00110	15_Quies-ES-deriv-hESC_Derived_CD56+_Mesoderm_Cultured_Cells,15_Quies-Other-Pancreas,15_Quies-Digestive-Rectal_Mucosa.Donor_29,15_Quies-Sm._Muscle-Duodenum_Smooth_Muscle,15_Quies-Other-Spleen,15_Quies-Brain-Brain_Mid_Frontal_Lobe,15_Quies-Sm._Muscle-Rectal_Smooth_Muscle,15_Quies-ENCODE2012-HeLa-S3_Cervical_Carcinoma,15_Quies-HSC_&_B-cell-CD14_Primary_Cells,15_Quies-iPSC-iPS-20b_Cell_Line,15_Quies…
chr1	144336554	144352893	pat_045	Gain	chr1	144340516	144340754	144340516	144340754	238	ncRNA_exonic	LINC00623,LOC728875	Bird_HAR435	HAR_Merge50-00110	15_Quies-ES-deriv-hESC_Derived_CD56+_Mesoderm_Cultured_Cells,15_Quies-Other-Pancreas,15_Quies-Digestive-Rectal_Mucosa.Donor_29,15_Quies-Sm._Muscle-Duodenum_Smooth_Muscle,15_Quies-Other-Spleen,15_Quies-Brain-Brain_Mid_Frontal_Lobe,15_Quies-Sm._Muscle-Rectal_Smooth_Muscle,15_Quies-ENCODE2012-HeLa-S3_Cervical_Carcinoma,15_Quies-HSC_&_B-cell-CD14_Primary_Cells,15_Quies-iPSC-iPS-20b_Cell_Line,15_Quies…
chr1	144336554	144352893	pat_046	Gain	chr1	144340516	144340754	144340516	144340754	238	ncRNA_exonic	LINC00623,LOC728875	Bird_HAR435	HAR_Merge50-00110	15_Quies-ES-deriv-hESC_Derived_CD56+_Mesoderm_Cultured_Cells,15_Quies-Other-Pancreas,15_Quies-Digestive-Rectal_Mucosa.Donor_29,15_Quies-Sm._Muscle-Duodenum_Smooth_Muscle,15_Quies-Other-Spleen,15_Quies-Brain-Brain_Mid_Frontal_Lobe,15_Quies-Sm._Muscle-Rectal_Smooth_Muscle,15_Quies-ENCODE2012-HeLa-S3_Cervical_Carcinoma,15_Quies-HSC_&_B-cell-CD14_Primary_Cells,15_Quies-iPSC-iPS-20b_Cell_Line,15_Quies…
chr1	144336554	144352893	pat_047	Gain	chr1	144340516	144340754	144340516	144340754	238	ncRNA_exonic	LINC00623,LOC728875	Bird_HAR435	HAR_Merge50-00110	15_Quies-ES-deriv-hESC_Derived_CD56+_Mesoderm_Cultured_Cells,15_Quies-Other-Pancreas,15_Quies-Digestive-Rectal_Mucosa.Donor_29,15_Quies-Sm._Muscle-Duodenum_Smooth_Muscle,15_Quies-Other-Spleen,15_Quies-Brain-Brain_Mid_Frontal_Lobe,15_Quies-Sm._Muscle-Rectal_Smooth_Muscle,15_Quies-ENCODE2012-HeLa-S3_Cervical_Carcinoma,15_Quies-HSC_&_B-cell-CD14_Primary_Cells,15_Quies-iPSC-iPS-20b_Cell_Line,15_Quies…
chr1	144336554	144352893	pat_048	Gain	chr1	144340516	144340754	144340516	144340754	238	ncRNA_exonic	LINC00623,LOC728875	Bird_HAR435	HAR_Merge50-00110	15_Quies-ES-deriv-hESC_Derived_CD56+_Mesoderm_Cultured_Cells,15_Quies-Other-Pancreas,15_Quies-Digestive-Rectal_Mucosa.Donor_29,15_Quies-Sm._Muscle-Duodenum_Smooth_Muscle,15_Quies-Other-Spleen,15_Quies-Brain-Brain_Mid_Frontal_Lobe,15_Quies-Sm._Muscle-Rectal_Smooth_Muscle,15_Quies-ENCODE2012-HeLa-S3_Cervical_Carcinoma,15_Quies-HSC_&_B-cell-CD14_Primary_Cells,15_Quies-iPSC-iPS-20b_Cell_Line,15_Quies…
chr1	144336554	144352893	pat_049	Gain	chr1	144340516	144340754	144340516	144340754	238	ncRNA_exonic	LINC00623,LOC728875	Bird_HAR435	HAR_Merge50-00110	15_Quies-ES-deriv-hESC_Derived_CD56+_Mesoderm_Cultured_Cells,15_Quies-Other-Pancreas,15_Quies-Digestive-Rectal_Mucosa.Donor_29,15_Quies-Sm._Muscle-Duodenum_Smooth_Muscle,15_Quies-Other-Spleen,15_Quies-Brain-Brain_Mid_Frontal_Lobe,15_Quies-Sm._Muscle-Rectal_Smooth_Muscle,15_Quies-ENCODE2012-HeLa-S3_Cervical_Carcinoma,15_Quies-HSC_&_B-cell-CD14_Primary_Cells,15_Quies-iPSC-iPS-20b_Cell_Line,15_Quies…
chr1	144336554	144352893	pat_050	Gain	chr1	144340516	144340754	144340516	144340754	238	ncRNA_exonic	LINC00623,LOC728875	Bird_HAR435	HAR_Merge50-00110	15_Quies-ES-deriv-hESC_Derived_CD56+_Mesoderm_Cultured_Cells,15_Quies-Other-Pancreas,15_Quies-Digestive-Rectal_Mucosa.Donor_29,15_Quies-Sm._Muscle-Duodenum_Smooth_Muscle,15_Quies-Other-Spleen,15_Quies-Brain-Brain_Mid_Frontal_Lobe,15_Quies-Sm._Muscle-Rectal_Smooth_Muscle,15_Quies-ENCODE2012-HeLa-S3_Cervical_Carcinoma,15_Quies-HSC_&_B-cell-CD14_Primary_Cells,15_Quies-iPSC-iPS-20b_Cell_Line,15_Quies…
chr1	144336554	144352893	pat_051	Gain	chr1	144340516	144340754	144340516	144340754	238	ncRNA_exonic	LINC00623,LOC728875	Bird_HAR435	HAR_Merge50-00110	15_Quies-ES-deriv-hESC_Derived_CD56+_Mesoderm_Cultured_Cells,15_Quies-Other-Pancreas,15_Quies-Digestive-Rectal_Mucosa.Donor_29,15_Quies-Sm._Muscle-Duodenum_Smooth_Muscle,15_Quies-Other-Spleen,15_Quies-Brain-Brain_Mid_Frontal_Lobe,15_Quies-Sm._Muscle-Rectal_Smooth_Muscle,15_Quies-ENCODE2012-HeLa-S3_Cervical_Carcinoma,15_Quies-HSC_&_B-cell-CD14_Primary_Cells,15_Quies-iPSC-iPS-20b_Cell_Line,15_Quies…
chr1	144336554	144352893	pat_052	Gain	chr1	144340516	144340754	144340516	144340754	238	ncRNA_exonic	LINC00623,LOC728875	Bird_HAR435	HAR_Merge50-00110	15_Quies-ES-deriv-hESC_Derived_CD56+_Mesoderm_Cultured_Cells,15_Quies-Other-Pancreas,15_Quies-Digestive-Rectal_Mucosa.Donor_29,15_Quies-Sm._Muscle-Duodenum_Smooth_Muscle,15_Quies-Other-Spleen,15_Quies-Brain-Brain_Mid_Frontal_Lobe,15_Quies-Sm._Muscle-Rectal_Smooth_Muscle,15_Quies-ENCODE2012-HeLa-S3_Cervical_Carcinoma,15_Quies-HSC_&_B-cell-CD14_Primary_Cells,15_Quies-iPSC-iPS-20b_Cell_Line,15_Quies…
chr1	144336554	144352893	pat_053	Gain	chr1	144340516	144340754	144340516	144340754	238	ncRNA_exonic	LINC00623,LOC728875	Bird_HAR435	HAR_Merge50-00110	15_Quies-ES-deriv-hESC_Derived_CD56+_Mesoderm_Cultured_Cells,15_Quies-Other-Pancreas,15_Quies-Digestive-Rectal_Mucosa.Donor_29,15_Quies-Sm._Muscle-Duodenum_Smooth_Muscle,15_Quies-Other-Spleen,15_Quies-Brain-Brain_Mid_Frontal_Lobe,15_Quies-Sm._Muscle-Rectal_Smooth_Muscle,15_Quies-ENCODE2012-HeLa-S3_Cervical_Carcinoma,15_Quies-HSC_&_B-cell-CD14_Primary_Cells,15_Quies-iPSC-iPS-20b_Cell_Line,15_Quies…
chr1	144336554	144352893	pat_054	Gain	chr1	144340516	144340754	144340516	144340754	238	ncRNA_exonic	LINC00623,LOC728875	Bird_HAR435	HAR_Merge50-00110	15_Quies-ES-deriv-hESC_Derived_CD56+_Mesoderm_Cultured_Cells,15_Quies-Other-Pancreas,15_Quies-Digestive-Rectal_Mucosa.Donor_29,15_Quies-Sm._Muscle-Duodenum_Smooth_Muscle,15_Quies-Other-Spleen,15_Quies-Brain-Brain_Mid_Frontal_Lobe,15_Quies-Sm._Muscle-Rectal_Smooth_Muscle,15_Quies-ENCODE2012-HeLa-S3_Cervical_Carcinoma,15_Quies-HSC_&_B-cell-CD14_Primary_Cells,15_Quies-iPSC-iPS-20b_Cell_Line,15_Quies…
chr1	144336554	144352893	pat_055	Gain	chr1	144340516	144340754	144340516	144340754	238	ncRNA_exonic	LINC00623,LOC728875	Bird_HAR435	HAR_Merge50-00110	15_Quies-ES-deriv-hESC_Derived_CD56+_Mesoderm_Cultured_Cells,15_Quies-Other-Pancreas,15_Quies-Digestive-Rectal_Mucosa.Donor_29,15_Quies-Sm._Muscle-Duodenum_Smooth_Muscle,15_Quies-Other-Spleen,15_Quies-Brain-Brain_Mid_Frontal_Lobe,15_Quies-Sm._Muscle-Rectal_Smooth_Muscle,15_Quies-ENCODE2012-HeLa-S3_Cervical_Carcinoma,15_Quies-HSC_&_B-cell-CD14_Primary_Cells,15_Quies-iPSC-iPS-20b_Cell_Line,15_Quies…
chr1	144336554	144352893	pat_056	Gain	chr1	144340516	144340754	144340516	144340754	238	ncRNA_exonic	LINC00623,LOC728875	Bird_HAR435	HAR_Merge50-00110	15_Quies-ES-deriv-hESC_Derived_CD56+_Mesoderm_Cultured_Cells,15_Quies-Other-Pancreas,15_Quies-Digestive-Rectal_Mucosa.Donor_29,15_Quies-Sm._Muscle-Duodenum_Smooth_Muscle,15_Quies-Other-Spleen,15_Quies-Brain-Brain_Mid_Frontal_Lobe,15_Quies-Sm._Muscle-Rectal_Smooth_Muscle,15_Quies-ENCODE2012-HeLa-S3_Cervical_Carcinoma,15_Quies-HSC_&_B-cell-CD14_Primary_Cells,15_Quies-iPSC-iPS-20b_Cell_Line,15_Quies…
chr1	144336554	144352893	pat_057	Gain	chr1	144340516	144340754	144340516	144340754	238	ncRNA_exonic	LINC00623,LOC728875	Bird_HAR435	HAR_Merge50-00110	15_Quies-ES-deriv-hESC_Derived_CD56+_Mesoderm_Cultured_Cells,15_Quies-Other-Pancreas,15_Quies-Digestive-Rectal_Mucosa.Donor_29,15_Quies-Sm._Muscle-Duodenum_Smooth_Muscle,15_Quies-Other-Spleen,15_Quies-Brain-Brain_Mid_Frontal_Lobe,15_Quies-Sm._Muscle-Rectal_Smooth_Muscle,15_Quies-ENCODE2012-HeLa-S3_Cervical_Carcinoma,15_Quies-HSC_&_B-cell-CD14_Primary_Cells,15_Quies-iPSC-iPS-20b_Cell_Line,15_Quies…
chr1	144336554	144368498	pat_058	Gain	chr1	144340516	144340754	144340516	144340754	238	ncRNA_exonic	LINC00623,LOC728875	Bird_HAR435	HAR_Merge50-00110	15_Quies-ES-deriv-hESC_Derived_CD56+_Mesoderm_Cultured_Cells,15_Quies-Other-Pancreas,15_Quies-Digestive-Rectal_Mucosa.Donor_29,15_Quies-Sm._Muscle-Duodenum_Smooth_Muscle,15_Quies-Other-Spleen,15_Quies-Brain-Brain_Mid_Frontal_Lobe,15_Quies-Sm._Muscle-Rectal_Smooth_Muscle,15_Quies-ENCODE2012-HeLa-S3_Cervical_Carcinoma,15_Quies-HSC_&_B-cell-CD14_Primary_Cells,15_Quies-iPSC-iPS-20b_Cell_Line,15_Quies…
chr1	144336554	144371839	pat_059	Gain	chr1	144340516	144340754	144340516	144340754	238	ncRNA_exonic	LINC00623,LOC728875	Bird_HAR435	HAR_Merge50-00110	15_Quies-ES-deriv-hESC_Derived_CD56+_Mesoderm_Cultured_Cells,15_Quies-Other-Pancreas,15_Quies-Digestive-Rectal_Mucosa.Donor_29,15_Quies-Sm._Muscle-Duodenum_Smooth_Muscle,15_Quies-Other-Spleen,15_Quies-Brain-Brain_Mid_Frontal_Lobe,15_Quies-Sm._Muscle-Rectal_Smooth_Muscle,15_Quies-ENCODE2012-HeLa-S3_Cervical_Carcinoma,15_Quies-HSC_&_B-cell-CD14_Primary_Cells,15_Quies-iPSC-iPS-20b_Cell_Line,15_Quies…
chr1	144336554	144371839	pat_060	Gain	chr1	144340516	144340754	144340516	144340754	238	ncRNA_exonic	LINC00623,LOC728875	Bird_HAR435	HAR_Merge50-00110	15_Quies-ES-deriv-hESC_Derived_CD56+_Mesoderm_Cultured_Cells,15_Quies-Other-Pancreas,15_Quies-Digestive-Rectal_Mucosa.Donor_29,15_Quies-Sm._Muscle-Duodenum_Smooth_Muscle,15_Quies-Other-Spleen,15_Quies-Brain-Brain_Mid_Frontal_Lobe,15_Quies-Sm._Muscle-Rectal_Smooth_Muscle,15_Quies-ENCODE2012-HeLa-S3_Cervical_Carcinoma,15_Quies-HSC_&_B-cell-CD14_Primary_Cells,15_Quies-iPSC-iPS-20b_Cell_Line,15_Quies…
chr1	144336554	144371839	pat_061	Gain	chr1	144340516	144340754	144340516	144340754	238	ncRNA_exonic	LINC00623,LOC728875	Bird_HAR435	HAR_Merge50-00110	15_Quies-ES-deriv-hESC_Derived_CD56+_Mesoderm_Cultured_Cells,15_Quies-Other-Pancreas,15_Quies-Digestive-Rectal_Mucosa.Donor_29,15_Quies-Sm._Muscle-Duodenum_Smooth_Muscle,15_Quies-Other-Spleen,15_Quies-Brain-Brain_Mid_Frontal_Lobe,15_Quies-Sm._Muscle-Rectal_Smooth_Muscle,15_Quies-ENCODE2012-HeLa-S3_Cervical_Carcinoma,15_Quies-HSC_&_B-cell-CD14_Primary_Cells,15_Quies-iPSC-iPS-20b_Cell_Line,15_Quies…
chr1	144336554	144387477	pat_062	Gain	chr1	144340516	144340754	144340516	144340754	238	ncRNA_exonic	LINC00623,LOC728875	Bird_HAR435	HAR_Merge50-00110	15_Quies-ES-deriv-hESC_Derived_CD56+_Mesoderm_Cultured_Cells,15_Quies-Other-Pancreas,15_Quies-Digestive-Rectal_Mucosa.Donor_29,15_Quies-Sm._Muscle-Duodenum_Smooth_Muscle,15_Quies-Other-Spleen,15_Quies-Brain-Brain_Mid_Frontal_Lobe,15_Quies-Sm._Muscle-Rectal_Smooth_Muscle,15_Quies-ENCODE2012-HeLa-S3_Cervical_Carcinoma,15_Quies-HSC_&_B-cell-CD14_Primary_Cells,15_Quies-iPSC-iPS-20b_Cell_Line,15_Quies…
chr1	144336554	144387477	pat_063	Gain	chr1	144340516	144340754	144340516	144340754	238	ncRNA_exonic	LINC00623,LOC728875	Bird_HAR435	HAR_Merge50-00110	15_Quies-ES-deriv-hESC_Derived_CD56+_Mesoderm_Cultured_Cells,15_Quies-Other-Pancreas,15_Quies-Digestive-Rectal_Mucosa.Donor_29,15_Quies-Sm._Muscle-Duodenum_Smooth_Muscle,15_Quies-Other-Spleen,15_Quies-Brain-Brain_Mid_Frontal_Lobe,15_Quies-Sm._Muscle-Rectal_Smooth_Muscle,15_Quies-ENCODE2012-HeLa-S3_Cervical_Carcinoma,15_Quies-HSC_&_B-cell-CD14_Primary_Cells,15_Quies-iPSC-iPS-20b_Cell_Line,15_Quies…
chr1	144336554	144387477	pat_064	Gain	chr1	144340516	144340754	144340516	144340754	238	ncRNA_exonic	LINC00623,LOC728875	Bird_HAR435	HAR_Merge50-00110	15_Quies-ES-deriv-hESC_Derived_CD56+_Mesoderm_Cultured_Cells,15_Quies-Other-Pancreas,15_Quies-Digestive-Rectal_Mucosa.Donor_29,15_Quies-Sm._Muscle-Duodenum_Smooth_Muscle,15_Quies-Other-Spleen,15_Quies-Brain-Brain_Mid_Frontal_Lobe,15_Quies-Sm._Muscle-Rectal_Smooth_Muscle,15_Quies-ENCODE2012-HeLa-S3_Cervical_Carcinoma,15_Quies-HSC_&_B-cell-CD14_Primary_Cells,15_Quies-iPSC-iPS-20b_Cell_Line,15_Quies…
chr1	144336554	144395373	pat_065	Gain	chr1	144340516	144340754	144340516	144340754	238	ncRNA_exonic	LINC00623,LOC728875	Bird_HAR435	HAR_Merge50-00110	15_Quies-ES-deriv-hESC_Derived_CD56+_Mesoderm_Cultured_Cells,15_Quies-Other-Pancreas,15_Quies-Digestive-Rectal_Mucosa.Donor_29,15_Quies-Sm._Muscle-Duodenum_Smooth_Muscle,15_Quies-Other-Spleen,15_Quies-Brain-Brain_Mid_Frontal_Lobe,15_Quies-Sm._Muscle-Rectal_Smooth_Muscle,15_Quies-ENCODE2012-HeLa-S3_Cervical_Carcinoma,15_Quies-HSC_&_B-cell-CD14_Primary_Cells,15_Quies-iPSC-iPS-20b_Cell_Line,15_Quies…
chr1	144483544	144562729	pat_066	Loss	chr1	144520764	144521012	144520764	144521012	248	ncRNA_exonic	LOC728875	Bird_HAR34	HAR_Merge50-00111	1_TssA-ES-deriv-H9_Derived_Neuronal_Progenitor_Cultured_Cells,10_TssBiv-ENCODE2012-A549_EtOH_0.02pct_Lung_Carcinoma,1_TssA-ENCODE2012-Osteoblasts,1_TssA-ES-deriv-hESC_Derived_CD56+_Mesoderm_Cultured_Cells,1_TssA-ES-deriv-H1_Derived_Mesenchymal_Stem_Cells,1_TssA-ES-deriv-H1_BMP4_Derived_Trophoblast_Cultured_Cells,1_TssA-iPSC-iPS-15b_Cell_Line,1_TssA-Other-Placenta_Amnion,15_Quies-Other-Spleen,1_Ts…
chr1	144560590	148762847	pat_067	Loss	chr1	146126727	146127077	146126727	146127077	350	ncRNA_intronic	LOC101929780	Bird_HAR151	HAR_Merge50-00112	15_Quies-ES-deriv-hESC_Derived_CD56+_Mesoderm_Cultured_Cells,15_Quies-Other-Pancreas,15_Quies-Digestive-Rectal_Mucosa.Donor_29,15_Quies-Sm._Muscle-Duodenum_Smooth_Muscle,15_Quies-Other-Spleen,15_Quies-Brain-Brain_Mid_Frontal_Lobe,15_Quies-Sm._Muscle-Rectal_Smooth_Muscle,15_Quies-ENCODE2012-HeLa-S3_Cervical_Carcinoma,15_Quies-HSC_&_B-cell-CD14_Primary_Cells,15_Quies-iPSC-iPS-20b_Cell_Line,15_Quies…
chr1	144560590	148762847	pat_067	Loss	chr1	146136363	146136465	146136363	146136465	102	ncRNA_intronic	LOC101929780	Bird_HAR436	HAR_Merge50-00113	15_Quies-ES-deriv-hESC_Derived_CD56+_Mesoderm_Cultured_Cells,15_Quies-Other-Pancreas,15_Quies-Digestive-Rectal_Mucosa.Donor_29,15_Quies-Sm._Muscle-Duodenum_Smooth_Muscle,15_Quies-Other-Spleen,15_Quies-Brain-Brain_Mid_Frontal_Lobe,15_Quies-Sm._Muscle-Rectal_Smooth_Muscle,15_Quies-ENCODE2012-HeLa-S3_Cervical_Carcinoma,15_Quies-HSC_&_B-cell-CD14_Primary_Cells,15_Quies-iPSC-iPS-20b_Cell_Line,15_Quies…
chr1	144560590	148762847	pat_067	Loss	chr1	146139587	146139754	146139587	146139754	167	ncRNA_intronic	LOC101929780	Bird_HAR35	HAR_Merge50-00114	15_Quies-ES-deriv-hESC_Derived_CD56+_Mesoderm_Cultured_Cells,15_Quies-Other-Pancreas,15_Quies-Digestive-Rectal_Mucosa.Donor_29,15_Quies-Sm._Muscle-Duodenum_Smooth_Muscle,15_Quies-Other-Spleen,15_Quies-Brain-Brain_Mid_Frontal_Lobe,15_Quies-Sm._Muscle-Rectal_Smooth_Muscle,15_Quies-ENCODE2012-HeLa-S3_Cervical_Carcinoma,15_Quies-HSC_&_B-cell-CD14_Primary_Cells,15_Quies-iPSC-iPS-20b_Cell_Line,15_Quies…
chr1	144560590	148762847	pat_067	Loss	chr1	146149884	146150718	146149884	146150718	834	ncRNA_intronic	LOC101929780	Bird_HAR2,Bird_HAR71	HAR_Merge50-00115	15_Quies-ES-deriv-hESC_Derived_CD56+_Mesoderm_Cultured_Cells,15_Quies-Other-Pancreas,15_Quies-Digestive-Rectal_Mucosa.Donor_29,15_Quies-Sm._Muscle-Duodenum_Smooth_Muscle,15_Quies-Other-Spleen,15_Quies-Brain-Brain_Mid_Frontal_Lobe,15_Quies-Sm._Muscle-Rectal_Smooth_Muscle,15_Quies-ENCODE2012-HeLa-S3_Cervical_Carcinoma,15_Quies-HSC_&_B-cell-CD14_Primary_Cells,15_Quies-iPSC-iPS-20b_Cell_Line,15_Quies…
chr1	144560590	148762847	pat_067	Loss	chr1	146512854	146513020	146512854	146513020	166	ncRNA_intronic	LOC728989	Bird_HAR72	HAR_Merge50-00116	14_ReprPCWk-Neurosph-Neurosphere_Cultured_Cells_Ganglionic_Eminence_Derived,5_TxWk-HSC_&_B-cell-CD19_Primary_Cells_Peripheral_UW,15_Quies-Other-Pancreas,15_Quies-Digestive-Rectal_Mucosa.Donor_29,15_Quies-Sm._Muscle-Duodenum_Smooth_Muscle,15_Quies-Other-Spleen,15_Quies-Brain-Brain_Mid_Frontal_Lobe,14_ReprPCWk-Mesench-Bone_Marrow_Derived_Mesenchymal_Stem_Cell_Cultured_Cells,15_Quies-Sm._Muscle-Rect…
chr1	144560590	148762847	pat_067	Loss	chr1	147691716	147692550	147691716	147692550	834	intronic	NBPF8	Bird_HAR3,Bird_HAR73	HAR_Merge50-00117	15_Quies-ES-deriv-hESC_Derived_CD56+_Mesoderm_Cultured_Cells,15_Quies-Other-Pancreas,15_Quies-Digestive-Rectal_Mucosa.Donor_29,15_Quies-Sm._Muscle-Duodenum_Smooth_Muscle,15_Quies-Other-Spleen,15_Quies-Brain-Brain_Mid_Frontal_Lobe,15_Quies-Sm._Muscle-Rectal_Smooth_Muscle,15_Quies-ENCODE2012-HeLa-S3_Cervical_Carcinoma,15_Quies-HSC_&_B-cell-CD14_Primary_Cells,15_Quies-iPSC-iPS-20b_Cell_Line,15_Quies…
chr1	144560590	148766024	pat_068	Loss	chr1	146126727	146127077	146126727	146127077	350	ncRNA_intronic	LOC101929780	Bird_HAR151	HAR_Merge50-00112	15_Quies-ES-deriv-hESC_Derived_CD56+_Mesoderm_Cultured_Cells,15_Quies-Other-Pancreas,15_Quies-Digestive-Rectal_Mucosa.Donor_29,15_Quies-Sm._Muscle-Duodenum_Smooth_Muscle,15_Quies-Other-Spleen,15_Quies-Brain-Brain_Mid_Frontal_Lobe,15_Quies-Sm._Muscle-Rectal_Smooth_Muscle,15_Quies-ENCODE2012-HeLa-S3_Cervical_Carcinoma,15_Quies-HSC_&_B-cell-CD14_Primary_Cells,15_Quies-iPSC-iPS-20b_Cell_Line,15_Quies…
chr1	144560590	148766024	pat_068	Loss	chr1	146136363	146136465	146136363	146136465	102	ncRNA_intronic	LOC101929780	Bird_HAR436	HAR_Merge50-00113	15_Quies-ES-deriv-hESC_Derived_CD56+_Mesoderm_Cultured_Cells,15_Quies-Other-Pancreas,15_Quies-Digestive-Rectal_Mucosa.Donor_29,15_Quies-Sm._Muscle-Duodenum_Smooth_Muscle,15_Quies-Other-Spleen,15_Quies-Brain-Brain_Mid_Frontal_Lobe,15_Quies-Sm._Muscle-Rectal_Smooth_Muscle,15_Quies-ENCODE2012-HeLa-S3_Cervical_Carcinoma,15_Quies-HSC_&_B-cell-CD14_Primary_Cells,15_Quies-iPSC-iPS-20b_Cell_Line,15_Quies…
chr1	144560590	148766024	pat_068	Loss	chr1	146139587	146139754	146139587	146139754	167	ncRNA_intronic	LOC101929780	Bird_HAR35	HAR_Merge50-00114	15_Quies-ES-deriv-hESC_Derived_CD56+_Mesoderm_Cultured_Cells,15_Quies-Other-Pancreas,15_Quies-Digestive-Rectal_Mucosa.Donor_29,15_Quies-Sm._Muscle-Duodenum_Smooth_Muscle,15_Quies-Other-Spleen,15_Quies-Brain-Brain_Mid_Frontal_Lobe,15_Quies-Sm._Muscle-Rectal_Smooth_Muscle,15_Quies-ENCODE2012-HeLa-S3_Cervical_Carcinoma,15_Quies-HSC_&_B-cell-CD14_Primary_Cells,15_Quies-iPSC-iPS-20b_Cell_Line,15_Quies…
chr1	144560590	148766024	pat_068	Loss	chr1	146149884	146150718	146149884	146150718	834	ncRNA_intronic	LOC101929780	Bird_HAR2,Bird_HAR71	HAR_Merge50-00115	15_Quies-ES-deriv-hESC_Derived_CD56+_Mesoderm_Cultured_Cells,15_Quies-Other-Pancreas,15_Quies-Digestive-Rectal_Mucosa.Donor_29,15_Quies-Sm._Muscle-Duodenum_Smooth_Muscle,15_Quies-Other-Spleen,15_Quies-Brain-Brain_Mid_Frontal_Lobe,15_Quies-Sm._Muscle-Rectal_Smooth_Muscle,15_Quies-ENCODE2012-HeLa-S3_Cervical_Carcinoma,15_Quies-HSC_&_B-cell-CD14_Primary_Cells,15_Quies-iPSC-iPS-20b_Cell_Line,15_Quies…
chr1	144560590	148766024	pat_068	Loss	chr1	146512854	146513020	146512854	146513020	166	ncRNA_intronic	LOC728989	Bird_HAR72	HAR_Merge50-00116	14_ReprPCWk-Neurosph-Neurosphere_Cultured_Cells_Ganglionic_Eminence_Derived,5_TxWk-HSC_&_B-cell-CD19_Primary_Cells_Peripheral_UW,15_Quies-Other-Pancreas,15_Quies-Digestive-Rectal_Mucosa.Donor_29,15_Quies-Sm._Muscle-Duodenum_Smooth_Muscle,15_Quies-Other-Spleen,15_Quies-Brain-Brain_Mid_Frontal_Lobe,14_ReprPCWk-Mesench-Bone_Marrow_Derived_Mesenchymal_Stem_Cell_Cultured_Cells,15_Quies-Sm._Muscle-Rect…
chr1	144560590	148766024	pat_068	Loss	chr1	147691716	147692550	147691716	147692550	834	intronic	NBPF8	Bird_HAR3,Bird_HAR73	HAR_Merge50-00117	15_Quies-ES-deriv-hESC_Derived_CD56+_Mesoderm_Cultured_Cells,15_Quies-Other-Pancreas,15_Quies-Digestive-Rectal_Mucosa.Donor_29,15_Quies-Sm._Muscle-Duodenum_Smooth_Muscle,15_Quies-Other-Spleen,15_Quies-Brain-Brain_Mid_Frontal_Lobe,15_Quies-Sm._Muscle-Rectal_Smooth_Muscle,15_Quies-ENCODE2012-HeLa-S3_Cervical_Carcinoma,15_Quies-HSC_&_B-cell-CD14_Primary_Cells,15_Quies-iPSC-iPS-20b_Cell_Line,15_Quies…
chr1	144560590	148766024	pat_069	Loss	chr1	146126727	146127077	146126727	146127077	350	ncRNA_intronic	LOC101929780	Bird_HAR151	HAR_Merge50-00112	15_Quies-ES-deriv-hESC_Derived_CD56+_Mesoderm_Cultured_Cells,15_Quies-Other-Pancreas,15_Quies-Digestive-Rectal_Mucosa.Donor_29,15_Quies-Sm._Muscle-Duodenum_Smooth_Muscle,15_Quies-Other-Spleen,15_Quies-Brain-Brain_Mid_Frontal_Lobe,15_Quies-Sm._Muscle-Rectal_Smooth_Muscle,15_Quies-ENCODE2012-HeLa-S3_Cervical_Carcinoma,15_Quies-HSC_&_B-cell-CD14_Primary_Cells,15_Quies-iPSC-iPS-20b_Cell_Line,15_Quies…
chr1	144560590	148766024	pat_069	Loss	chr1	146136363	146136465	146136363	146136465	102	ncRNA_intronic	LOC101929780	Bird_HAR436	HAR_Merge50-00113	15_Quies-ES-deriv-hESC_Derived_CD56+_Mesoderm_Cultured_Cells,15_Quies-Other-Pancreas,15_Quies-Digestive-Rectal_Mucosa.Donor_29,15_Quies-Sm._Muscle-Duodenum_Smooth_Muscle,15_Quies-Other-Spleen,15_Quies-Brain-Brain_Mid_Frontal_Lobe,15_Quies-Sm._Muscle-Rectal_Smooth_Muscle,15_Quies-ENCODE2012-HeLa-S3_Cervical_Carcinoma,15_Quies-HSC_&_B-cell-CD14_Primary_Cells,15_Quies-iPSC-iPS-20b_Cell_Line,15_Quies…
chr1	144560590	148766024	pat_069	Loss	chr1	146139587	146139754	146139587	146139754	167	ncRNA_intronic	LOC101929780	Bird_HAR35	HAR_Merge50-00114	15_Quies-ES-deriv-hESC_Derived_CD56+_Mesoderm_Cultured_Cells,15_Quies-Other-Pancreas,15_Quies-Digestive-Rectal_Mucosa.Donor_29,15_Quies-Sm._Muscle-Duodenum_Smooth_Muscle,15_Quies-Other-Spleen,15_Quies-Brain-Brain_Mid_Frontal_Lobe,15_Quies-Sm._Muscle-Rectal_Smooth_Muscle,15_Quies-ENCODE2012-HeLa-S3_Cervical_Carcinoma,15_Quies-HSC_&_B-cell-CD14_Primary_Cells,15_Quies-iPSC-iPS-20b_Cell_Line,15_Quies…
chr1	144560590	148766024	pat_069	Loss	chr1	146149884	146150718	146149884	146150718	834	ncRNA_intronic	LOC101929780	Bird_HAR2,Bird_HAR71	HAR_Merge50-00115	15_Quies-ES-deriv-hESC_Derived_CD56+_Mesoderm_Cultured_Cells,15_Quies-Other-Pancreas,15_Quies-Digestive-Rectal_Mucosa.Donor_29,15_Quies-Sm._Muscle-Duodenum_Smooth_Muscle,15_Quies-Other-Spleen,15_Quies-Brain-Brain_Mid_Frontal_Lobe,15_Quies-Sm._Muscle-Rectal_Smooth_Muscle,15_Quies-ENCODE2012-HeLa-S3_Cervical_Carcinoma,15_Quies-HSC_&_B-cell-CD14_Primary_Cells,15_Quies-iPSC-iPS-20b_Cell_Line,15_Quies…
chr1	144560590	148766024	pat_069	Loss	chr1	146512854	146513020	146512854	146513020	166	ncRNA_intronic	LOC728989	Bird_HAR72	HAR_Merge50-00116	14_ReprPCWk-Neurosph-Neurosphere_Cultured_Cells_Ganglionic_Eminence_Derived,5_TxWk-HSC_&_B-cell-CD19_Primary_Cells_Peripheral_UW,15_Quies-Other-Pancreas,15_Quies-Digestive-Rectal_Mucosa.Donor_29,15_Quies-Sm._Muscle-Duodenum_Smooth_Muscle,15_Quies-Other-Spleen,15_Quies-Brain-Brain_Mid_Frontal_Lobe,14_ReprPCWk-Mesench-Bone_Marrow_Derived_Mesenchymal_Stem_Cell_Cultured_Cells,15_Quies-Sm._Muscle-Rect…
chr1	144560590	148766024	pat_069	Loss	chr1	147691716	147692550	147691716	147692550	834	intronic	NBPF8	Bird_HAR3,Bird_HAR73	HAR_Merge50-00117	15_Quies-ES-deriv-hESC_Derived_CD56+_Mesoderm_Cultured_Cells,15_Quies-Other-Pancreas,15_Quies-Digestive-Rectal_Mucosa.Donor_29,15_Quies-Sm._Muscle-Duodenum_Smooth_Muscle,15_Quies-Other-Spleen,15_Quies-Brain-Brain_Mid_Frontal_Lobe,15_Quies-Sm._Muscle-Rectal_Smooth_Muscle,15_Quies-ENCODE2012-HeLa-S3_Cervical_Carcinoma,15_Quies-HSC_&_B-cell-CD14_Primary_Cells,15_Quies-iPSC-iPS-20b_Cell_Line,15_Quies…
chr1	144560590	148766024	pat_070	Loss	chr1	146126727	146127077	146126727	146127077	350	ncRNA_intronic	LOC101929780	Bird_HAR151	HAR_Merge50-00112	15_Quies-ES-deriv-hESC_Derived_CD56+_Mesoderm_Cultured_Cells,15_Quies-Other-Pancreas,15_Quies-Digestive-Rectal_Mucosa.Donor_29,15_Quies-Sm._Muscle-Duodenum_Smooth_Muscle,15_Quies-Other-Spleen,15_Quies-Brain-Brain_Mid_Frontal_Lobe,15_Quies-Sm._Muscle-Rectal_Smooth_Muscle,15_Quies-ENCODE2012-HeLa-S3_Cervical_Carcinoma,15_Quies-HSC_&_B-cell-CD14_Primary_Cells,15_Quies-iPSC-iPS-20b_Cell_Line,15_Quies…
chr1	144560590	148766024	pat_070	Loss	chr1	146136363	146136465	146136363	146136465	102	ncRNA_intronic	LOC101929780	Bird_HAR436	HAR_Merge50-00113	15_Quies-ES-deriv-hESC_Derived_CD56+_Mesoderm_Cultured_Cells,15_Quies-Other-Pancreas,15_Quies-Digestive-Rectal_Mucosa.Donor_29,15_Quies-Sm._Muscle-Duodenum_Smooth_Muscle,15_Quies-Other-Spleen,15_Quies-Brain-Brain_Mid_Frontal_Lobe,15_Quies-Sm._Muscle-Rectal_Smooth_Muscle,15_Quies-ENCODE2012-HeLa-S3_Cervical_Carcinoma,15_Quies-HSC_&_B-cell-CD14_Primary_Cells,15_Quies-iPSC-iPS-20b_Cell_Line,15_Quies…
chr1	144560590	148766024	pat_070	Loss	chr1	146139587	146139754	146139587	146139754	167	ncRNA_intronic	LOC101929780	Bird_HAR35	HAR_Merge50-00114	15_Quies-ES-deriv-hESC_Derived_CD56+_Mesoderm_Cultured_Cells,15_Quies-Other-Pancreas,15_Quies-Digestive-Rectal_Mucosa.Donor_29,15_Quies-Sm._Muscle-Duodenum_Smooth_Muscle,15_Quies-Other-Spleen,15_Quies-Brain-Brain_Mid_Frontal_Lobe,15_Quies-Sm._Muscle-Rectal_Smooth_Muscle,15_Quies-ENCODE2012-HeLa-S3_Cervical_Carcinoma,15_Quies-HSC_&_B-cell-CD14_Primary_Cells,15_Quies-iPSC-iPS-20b_Cell_Line,15_Quies…
chr1	144560590	148766024	pat_070	Loss	chr1	146149884	146150718	146149884	146150718	834	ncRNA_intronic	LOC101929780	Bird_HAR2,Bird_HAR71	HAR_Merge50-00115	15_Quies-ES-deriv-hESC_Derived_CD56+_Mesoderm_Cultured_Cells,15_Quies-Other-Pancreas,15_Quies-Digestive-Rectal_Mucosa.Donor_29,15_Quies-Sm._Muscle-Duodenum_Smooth_Muscle,15_Quies-Other-Spleen,15_Quies-Brain-Brain_Mid_Frontal_Lobe,15_Quies-Sm._Muscle-Rectal_Smooth_Muscle,15_Quies-ENCODE2012-HeLa-S3_Cervical_Carcinoma,15_Quies-HSC_&_B-cell-CD14_Primary_Cells,15_Quies-iPSC-iPS-20b_Cell_Line,15_Quies…
chr1	144560590	148766024	pat_070	Loss	chr1	146512854	146513020	146512854	146513020	166	ncRNA_intronic	LOC728989	Bird_HAR72	HAR_Merge50-00116	14_ReprPCWk-Neurosph-Neurosphere_Cultured_Cells_Ganglionic_Eminence_Derived,5_TxWk-HSC_&_B-cell-CD19_Primary_Cells_Peripheral_UW,15_Quies-Other-Pancreas,15_Quies-Digestive-Rectal_Mucosa.Donor_29,15_Quies-Sm._Muscle-Duodenum_Smooth_Muscle,15_Quies-Other-Spleen,15_Quies-Brain-Brain_Mid_Frontal_Lobe,14_ReprPCWk-Mesench-Bone_Marrow_Derived_Mesenchymal_Stem_Cell_Cultured_Cells,15_Quies-Sm._Muscle-Rect…
chr1	144560590	148766024	pat_070	Loss	chr1	147691716	147692550	147691716	147692550	834	intronic	NBPF8	Bird_HAR3,Bird_HAR73	HAR_Merge50-00117	15_Quies-ES-deriv-hESC_Derived_CD56+_Mesoderm_Cultured_Cells,15_Quies-Other-Pancreas,15_Quies-Digestive-Rectal_Mucosa.Donor_29,15_Quies-Sm._Muscle-Duodenum_Smooth_Muscle,15_Quies-Other-Spleen,15_Quies-Brain-Brain_Mid_Frontal_Lobe,15_Quies-Sm._Muscle-Rectal_Smooth_Muscle,15_Quies-ENCODE2012-HeLa-S3_Cervical_Carcinoma,15_Quies-HSC_&_B-cell-CD14_Primary_Cells,15_Quies-iPSC-iPS-20b_Cell_Line,15_Quies…
chr1	144560590	148766024	pat_071	Loss	chr1	146126727	146127077	146126727	146127077	350	ncRNA_intronic	LOC101929780	Bird_HAR151	HAR_Merge50-00112	15_Quies-ES-deriv-hESC_Derived_CD56+_Mesoderm_Cultured_Cells,15_Quies-Other-Pancreas,15_Quies-Digestive-Rectal_Mucosa.Donor_29,15_Quies-Sm._Muscle-Duodenum_Smooth_Muscle,15_Quies-Other-Spleen,15_Quies-Brain-Brain_Mid_Frontal_Lobe,15_Quies-Sm._Muscle-Rectal_Smooth_Muscle,15_Quies-ENCODE2012-HeLa-S3_Cervical_Carcinoma,15_Quies-HSC_&_B-cell-CD14_Primary_Cells,15_Quies-iPSC-iPS-20b_Cell_Line,15_Quies…
chr1	144560590	148766024	pat_071	Loss	chr1	146136363	146136465	146136363	146136465	102	ncRNA_intronic	LOC101929780	Bird_HAR436	HAR_Merge50-00113	15_Quies-ES-deriv-hESC_Derived_CD56+_Mesoderm_Cultured_Cells,15_Quies-Other-Pancreas,15_Quies-Digestive-Rectal_Mucosa.Donor_29,15_Quies-Sm._Muscle-Duodenum_Smooth_Muscle,15_Quies-Other-Spleen,15_Quies-Brain-Brain_Mid_Frontal_Lobe,15_Quies-Sm._Muscle-Rectal_Smooth_Muscle,15_Quies-ENCODE2012-HeLa-S3_Cervical_Carcinoma,15_Quies-HSC_&_B-cell-CD14_Primary_Cells,15_Quies-iPSC-iPS-20b_Cell_Line,15_Quies…
chr1	144560590	148766024	pat_071	Loss	chr1	146139587	146139754	146139587	146139754	167	ncRNA_intronic	LOC101929780	Bird_HAR35	HAR_Merge50-00114	15_Quies-ES-deriv-hESC_Derived_CD56+_Mesoderm_Cultured_Cells,15_Quies-Other-Pancreas,15_Quies-Digestive-Rectal_Mucosa.Donor_29,15_Quies-Sm._Muscle-Duodenum_Smooth_Muscle,15_Quies-Other-Spleen,15_Quies-Brain-Brain_Mid_Frontal_Lobe,15_Quies-Sm._Muscle-Rectal_Smooth_Muscle,15_Quies-ENCODE2012-HeLa-S3_Cervical_Carcinoma,15_Quies-HSC_&_B-cell-CD14_Primary_Cells,15_Quies-iPSC-iPS-20b_Cell_Line,15_Quies…
chr1	144560590	148766024	pat_071	Loss	chr1	146149884	146150718	146149884	146150718	834	ncRNA_intronic	LOC101929780	Bird_HAR2,Bird_HAR71	HAR_Merge50-00115	15_Quies-ES-deriv-hESC_Derived_CD56+_Mesoderm_Cultured_Cells,15_Quies-Other-Pancreas,15_Quies-Digestive-Rectal_Mucosa.Donor_29,15_Quies-Sm._Muscle-Duodenum_Smooth_Muscle,15_Quies-Other-Spleen,15_Quies-Brain-Brain_Mid_Frontal_Lobe,15_Quies-Sm._Muscle-Rectal_Smooth_Muscle,15_Quies-ENCODE2012-HeLa-S3_Cervical_Carcinoma,15_Quies-HSC_&_B-cell-CD14_Primary_Cells,15_Quies-iPSC-iPS-20b_Cell_Line,15_Quies…
chr1	144560590	148766024	pat_071	Loss	chr1	146512854	146513020	146512854	146513020	166	ncRNA_intronic	LOC728989	Bird_HAR72	HAR_Merge50-00116	14_ReprPCWk-Neurosph-Neurosphere_Cultured_Cells_Ganglionic_Eminence_Derived,5_TxWk-HSC_&_B-cell-CD19_Primary_Cells_Peripheral_UW,15_Quies-Other-Pancreas,15_Quies-Digestive-Rectal_Mucosa.Donor_29,15_Quies-Sm._Muscle-Duodenum_Smooth_Muscle,15_Quies-Other-Spleen,15_Quies-Brain-Brain_Mid_Frontal_Lobe,14_ReprPCWk-Mesench-Bone_Marrow_Derived_Mesenchymal_Stem_Cell_Cultured_Cells,15_Quies-Sm._Muscle-Rect…
chr1	144560590	148766024	pat_071	Loss	chr1	147691716	147692550	147691716	147692550	834	intronic	NBPF8	Bird_HAR3,Bird_HAR73	HAR_Merge50-00117	15_Quies-ES-deriv-hESC_Derived_CD56+_Mesoderm_Cultured_Cells,15_Quies-Other-Pancreas,15_Quies-Digestive-Rectal_Mucosa.Donor_29,15_Quies-Sm._Muscle-Duodenum_Smooth_Muscle,15_Quies-Other-Spleen,15_Quies-Brain-Brain_Mid_Frontal_Lobe,15_Quies-Sm._Muscle-Rectal_Smooth_Muscle,15_Quies-ENCODE2012-HeLa-S3_Cervical_Carcinoma,15_Quies-HSC_&_B-cell-CD14_Primary_Cells,15_Quies-iPSC-iPS-20b_Cell_Line,15_Quies…
chr1	144560590	148775361	pat_072	Loss	chr1	146126727	146127077	146126727	146127077	350	ncRNA_intronic	LOC101929780	Bird_HAR151	HAR_Merge50-00112	15_Quies-ES-deriv-hESC_Derived_CD56+_Mesoderm_Cultured_Cells,15_Quies-Other-Pancreas,15_Quies-Digestive-Rectal_Mucosa.Donor_29,15_Quies-Sm._Muscle-Duodenum_Smooth_Muscle,15_Quies-Other-Spleen,15_Quies-Brain-Brain_Mid_Frontal_Lobe,15_Quies-Sm._Muscle-Rectal_Smooth_Muscle,15_Quies-ENCODE2012-HeLa-S3_Cervical_Carcinoma,15_Quies-HSC_&_B-cell-CD14_Primary_Cells,15_Quies-iPSC-iPS-20b_Cell_Line,15_Quies…
chr1	144560590	148775361	pat_072	Loss	chr1	146136363	146136465	146136363	146136465	102	ncRNA_intronic	LOC101929780	Bird_HAR436	HAR_Merge50-00113	15_Quies-ES-deriv-hESC_Derived_CD56+_Mesoderm_Cultured_Cells,15_Quies-Other-Pancreas,15_Quies-Digestive-Rectal_Mucosa.Donor_29,15_Quies-Sm._Muscle-Duodenum_Smooth_Muscle,15_Quies-Other-Spleen,15_Quies-Brain-Brain_Mid_Frontal_Lobe,15_Quies-Sm._Muscle-Rectal_Smooth_Muscle,15_Quies-ENCODE2012-HeLa-S3_Cervical_Carcinoma,15_Quies-HSC_&_B-cell-CD14_Primary_Cells,15_Quies-iPSC-iPS-20b_Cell_Line,15_Quies…
chr1	144560590	148775361	pat_072	Loss	chr1	146139587	146139754	146139587	146139754	167	ncRNA_intronic	LOC101929780	Bird_HAR35	HAR_Merge50-00114	15_Quies-ES-deriv-hESC_Derived_CD56+_Mesoderm_Cultured_Cells,15_Quies-Other-Pancreas,15_Quies-Digestive-Rectal_Mucosa.Donor_29,15_Quies-Sm._Muscle-Duodenum_Smooth_Muscle,15_Quies-Other-Spleen,15_Quies-Brain-Brain_Mid_Frontal_Lobe,15_Quies-Sm._Muscle-Rectal_Smooth_Muscle,15_Quies-ENCODE2012-HeLa-S3_Cervical_Carcinoma,15_Quies-HSC_&_B-cell-CD14_Primary_Cells,15_Quies-iPSC-iPS-20b_Cell_Line,15_Quies…
chr1	144560590	148775361	pat_072	Loss	chr1	146149884	146150718	146149884	146150718	834	ncRNA_intronic	LOC101929780	Bird_HAR2,Bird_HAR71	HAR_Merge50-00115	15_Quies-ES-deriv-hESC_Derived_CD56+_Mesoderm_Cultured_Cells,15_Quies-Other-Pancreas,15_Quies-Digestive-Rectal_Mucosa.Donor_29,15_Quies-Sm._Muscle-Duodenum_Smooth_Muscle,15_Quies-Other-Spleen,15_Quies-Brain-Brain_Mid_Frontal_Lobe,15_Quies-Sm._Muscle-Rectal_Smooth_Muscle,15_Quies-ENCODE2012-HeLa-S3_Cervical_Carcinoma,15_Quies-HSC_&_B-cell-CD14_Primary_Cells,15_Quies-iPSC-iPS-20b_Cell_Line,15_Quies…
chr1	144560590	148775361	pat_072	Loss	chr1	146512854	146513020	146512854	146513020	166	ncRNA_intronic	LOC728989	Bird_HAR72	HAR_Merge50-00116	14_ReprPCWk-Neurosph-Neurosphere_Cultured_Cells_Ganglionic_Eminence_Derived,5_TxWk-HSC_&_B-cell-CD19_Primary_Cells_Peripheral_UW,15_Quies-Other-Pancreas,15_Quies-Digestive-Rectal_Mucosa.Donor_29,15_Quies-Sm._Muscle-Duodenum_Smooth_Muscle,15_Quies-Other-Spleen,15_Quies-Brain-Brain_Mid_Frontal_Lobe,14_ReprPCWk-Mesench-Bone_Marrow_Derived_Mesenchymal_Stem_Cell_Cultured_Cells,15_Quies-Sm._Muscle-Rect…
chr1	144560590	148775361	pat_072	Loss	chr1	147691716	147692550	147691716	147692550	834	intronic	NBPF8	Bird_HAR3,Bird_HAR73	HAR_Merge50-00117	15_Quies-ES-deriv-hESC_Derived_CD56+_Mesoderm_Cultured_Cells,15_Quies-Other-Pancreas,15_Quies-Digestive-Rectal_Mucosa.Donor_29,15_Quies-Sm._Muscle-Duodenum_Smooth_Muscle,15_Quies-Other-Spleen,15_Quies-Brain-Brain_Mid_Frontal_Lobe,15_Quies-Sm._Muscle-Rectal_Smooth_Muscle,15_Quies-ENCODE2012-HeLa-S3_Cervical_Carcinoma,15_Quies-HSC_&_B-cell-CD14_Primary_Cells,15_Quies-iPSC-iPS-20b_Cell_Line,15_Quies…
chr1	145744556	146498785	pat_010	Gain	chr1	146126727	146127077	146126727	146127077	350	ncRNA_intronic	LOC101929780	Bird_HAR151	HAR_Merge50-00112	15_Quies-ES-deriv-hESC_Derived_CD56+_Mesoderm_Cultured_Cells,15_Quies-Other-Pancreas,15_Quies-Digestive-Rectal_Mucosa.Donor_29,15_Quies-Sm._Muscle-Duodenum_Smooth_Muscle,15_Quies-Other-Spleen,15_Quies-Brain-Brain_Mid_Frontal_Lobe,15_Quies-Sm._Muscle-Rectal_Smooth_Muscle,15_Quies-ENCODE2012-HeLa-S3_Cervical_Carcinoma,15_Quies-HSC_&_B-cell-CD14_Primary_Cells,15_Quies-iPSC-iPS-20b_Cell_Line,15_Quies…
chr1	145744556	146498785	pat_010	Gain	chr1	146136363	146136465	146136363	146136465	102	ncRNA_intronic	LOC101929780	Bird_HAR436	HAR_Merge50-00113	15_Quies-ES-deriv-hESC_Derived_CD56+_Mesoderm_Cultured_Cells,15_Quies-Other-Pancreas,15_Quies-Digestive-Rectal_Mucosa.Donor_29,15_Quies-Sm._Muscle-Duodenum_Smooth_Muscle,15_Quies-Other-Spleen,15_Quies-Brain-Brain_Mid_Frontal_Lobe,15_Quies-Sm._Muscle-Rectal_Smooth_Muscle,15_Quies-ENCODE2012-HeLa-S3_Cervical_Carcinoma,15_Quies-HSC_&_B-cell-CD14_Primary_Cells,15_Quies-iPSC-iPS-20b_Cell_Line,15_Quies…
chr1	145744556	146498785	pat_010	Gain	chr1	146139587	146139754	146139587	146139754	167	ncRNA_intronic	LOC101929780	Bird_HAR35	HAR_Merge50-00114	15_Quies-ES-deriv-hESC_Derived_CD56+_Mesoderm_Cultured_Cells,15_Quies-Other-Pancreas,15_Quies-Digestive-Rectal_Mucosa.Donor_29,15_Quies-Sm._Muscle-Duodenum_Smooth_Muscle,15_Quies-Other-Spleen,15_Quies-Brain-Brain_Mid_Frontal_Lobe,15_Quies-Sm._Muscle-Rectal_Smooth_Muscle,15_Quies-ENCODE2012-HeLa-S3_Cervical_Carcinoma,15_Quies-HSC_&_B-cell-CD14_Primary_Cells,15_Quies-iPSC-iPS-20b_Cell_Line,15_Quies…
chr1	145744556	146498785	pat_010	Gain	chr1	146149884	146150718	146149884	146150718	834	ncRNA_intronic	LOC101929780	Bird_HAR2,Bird_HAR71	HAR_Merge50-00115	15_Quies-ES-deriv-hESC_Derived_CD56+_Mesoderm_Cultured_Cells,15_Quies-Other-Pancreas,15_Quies-Digestive-Rectal_Mucosa.Donor_29,15_Quies-Sm._Muscle-Duodenum_Smooth_Muscle,15_Quies-Other-Spleen,15_Quies-Brain-Brain_Mid_Frontal_Lobe,15_Quies-Sm._Muscle-Rectal_Smooth_Muscle,15_Quies-ENCODE2012-HeLa-S3_Cervical_Carcinoma,15_Quies-HSC_&_B-cell-CD14_Primary_Cells,15_Quies-iPSC-iPS-20b_Cell_Line,15_Quies…
chr1	146003044	147398560	pat_062	Gain	chr1	146126727	146127077	146126727	146127077	350	ncRNA_intronic	LOC101929780	Bird_HAR151	HAR_Merge50-00112	15_Quies-ES-deriv-hESC_Derived_CD56+_Mesoderm_Cultured_Cells,15_Quies-Other-Pancreas,15_Quies-Digestive-Rectal_Mucosa.Donor_29,15_Quies-Sm._Muscle-Duodenum_Smooth_Muscle,15_Quies-Other-Spleen,15_Quies-Brain-Brain_Mid_Frontal_Lobe,15_Quies-Sm._Muscle-Rectal_Smooth_Muscle,15_Quies-ENCODE2012-HeLa-S3_Cervical_Carcinoma,15_Quies-HSC_&_B-cell-CD14_Primary_Cells,15_Quies-iPSC-iPS-20b_Cell_Line,15_Quies…
chr1	146003044	147398560	pat_062	Gain	chr1	146136363	146136465	146136363	146136465	102	ncRNA_intronic	LOC101929780	Bird_HAR436	HAR_Merge50-00113	15_Quies-ES-deriv-hESC_Derived_CD56+_Mesoderm_Cultured_Cells,15_Quies-Other-Pancreas,15_Quies-Digestive-Rectal_Mucosa.Donor_29,15_Quies-Sm._Muscle-Duodenum_Smooth_Muscle,15_Quies-Other-Spleen,15_Quies-Brain-Brain_Mid_Frontal_Lobe,15_Quies-Sm._Muscle-Rectal_Smooth_Muscle,15_Quies-ENCODE2012-HeLa-S3_Cervical_Carcinoma,15_Quies-HSC_&_B-cell-CD14_Primary_Cells,15_Quies-iPSC-iPS-20b_Cell_Line,15_Quies…
chr1	146003044	147398560	pat_062	Gain	chr1	146139587	146139754	146139587	146139754	167	ncRNA_intronic	LOC101929780	Bird_HAR35	HAR_Merge50-00114	15_Quies-ES-deriv-hESC_Derived_CD56+_Mesoderm_Cultured_Cells,15_Quies-Other-Pancreas,15_Quies-Digestive-Rectal_Mucosa.Donor_29,15_Quies-Sm._Muscle-Duodenum_Smooth_Muscle,15_Quies-Other-Spleen,15_Quies-Brain-Brain_Mid_Frontal_Lobe,15_Quies-Sm._Muscle-Rectal_Smooth_Muscle,15_Quies-ENCODE2012-HeLa-S3_Cervical_Carcinoma,15_Quies-HSC_&_B-cell-CD14_Primary_Cells,15_Quies-iPSC-iPS-20b_Cell_Line,15_Quies…
chr1	146003044	147398560	pat_062	Gain	chr1	146149884	146150718	146149884	146150718	834	ncRNA_intronic	LOC101929780	Bird_HAR2,Bird_HAR71	HAR_Merge50-00115	15_Quies-ES-deriv-hESC_Derived_CD56+_Mesoderm_Cultured_Cells,15_Quies-Other-Pancreas,15_Quies-Digestive-Rectal_Mucosa.Donor_29,15_Quies-Sm._Muscle-Duodenum_Smooth_Muscle,15_Quies-Other-Spleen,15_Quies-Brain-Brain_Mid_Frontal_Lobe,15_Quies-Sm._Muscle-Rectal_Smooth_Muscle,15_Quies-ENCODE2012-HeLa-S3_Cervical_Carcinoma,15_Quies-HSC_&_B-cell-CD14_Primary_Cells,15_Quies-iPSC-iPS-20b_Cell_Line,15_Quies…
chr1	146003044	147398560	pat_062	Gain	chr1	146512854	146513020	146512854	146513020	166	ncRNA_intronic	LOC728989	Bird_HAR72	HAR_Merge50-00116	14_ReprPCWk-Neurosph-Neurosphere_Cultured_Cells_Ganglionic_Eminence_Derived,5_TxWk-HSC_&_B-cell-CD19_Primary_Cells_Peripheral_UW,15_Quies-Other-Pancreas,15_Quies-Digestive-Rectal_Mucosa.Donor_29,15_Quies-Sm._Muscle-Duodenum_Smooth_Muscle,15_Quies-Other-Spleen,15_Quies-Brain-Brain_Mid_Frontal_Lobe,14_ReprPCWk-Mesench-Bone_Marrow_Derived_Mesenchymal_Stem_Cell_Cultured_Cells,15_Quies-Sm._Muscle-Rect…
chr1	147401421	147819294	pat_010	Gain	chr1	147691716	147692550	147691716	147692550	834	intronic	NBPF8	Bird_HAR3,Bird_HAR73	HAR_Merge50-00117	15_Quies-ES-deriv-hESC_Derived_CD56+_Mesoderm_Cultured_Cells,15_Quies-Other-Pancreas,15_Quies-Digestive-Rectal_Mucosa.Donor_29,15_Quies-Sm._Muscle-Duodenum_Smooth_Muscle,15_Quies-Other-Spleen,15_Quies-Brain-Brain_Mid_Frontal_Lobe,15_Quies-Sm._Muscle-Rectal_Smooth_Muscle,15_Quies-ENCODE2012-HeLa-S3_Cervical_Carcinoma,15_Quies-HSC_&_B-cell-CD14_Primary_Cells,15_Quies-iPSC-iPS-20b_Cell_Line,15_Quies…
chr1	147428069	147978640	pat_062	Gain	chr1	147691716	147692550	147691716	147692550	834	intronic	NBPF8	Bird_HAR3,Bird_HAR73	HAR_Merge50-00117	15_Quies-ES-deriv-hESC_Derived_CD56+_Mesoderm_Cultured_Cells,15_Quies-Other-Pancreas,15_Quies-Digestive-Rectal_Mucosa.Donor_29,15_Quies-Sm._Muscle-Duodenum_Smooth_Muscle,15_Quies-Other-Spleen,15_Quies-Brain-Brain_Mid_Frontal_Lobe,15_Quies-Sm._Muscle-Rectal_Smooth_Muscle,15_Quies-ENCODE2012-HeLa-S3_Cervical_Carcinoma,15_Quies-HSC_&_B-cell-CD14_Primary_Cells,15_Quies-iPSC-iPS-20b_Cell_Line,15_Quies…
chr1	148555450	149746999	pat_073	Gain	chr1	149576471	149576706	149576471	149576706	235	ncRNA_exonic	LINC00623,LINC00869	Bird_HAR437	HAR_Merge50-00118	5_TxWk-HSC_&_B-cell-CD19_Primary_Cells_Peripheral_UW,15_Quies-ES-deriv-hESC_Derived_CD56+_Mesoderm_Cultured_Cells,1_TssA-ENCODE2012-Osteoblasts,15_Quies-Other-Pancreas,15_Quies-Digestive-Rectal_Mucosa.Donor_29,1_TssA-ES-deriv-hESC_Derived_CD56+_Mesoderm_Cultured_Cells,15_Quies-Sm._Muscle-Duodenum_Smooth_Muscle,15_Quies-Other-Spleen,15_Quies-Brain-Brain_Mid_Frontal_Lobe,1_TssA-Blood_&_T-cell-CD3_P…
chr1	148555450	149789009	pat_074	Gain	chr1	149576471	149576706	149576471	149576706	235	ncRNA_exonic	LINC00623,LINC00869	Bird_HAR437	HAR_Merge50-00118	5_TxWk-HSC_&_B-cell-CD19_Primary_Cells_Peripheral_UW,15_Quies-ES-deriv-hESC_Derived_CD56+_Mesoderm_Cultured_Cells,1_TssA-ENCODE2012-Osteoblasts,15_Quies-Other-Pancreas,15_Quies-Digestive-Rectal_Mucosa.Donor_29,1_TssA-ES-deriv-hESC_Derived_CD56+_Mesoderm_Cultured_Cells,15_Quies-Sm._Muscle-Duodenum_Smooth_Muscle,15_Quies-Other-Spleen,15_Quies-Brain-Brain_Mid_Frontal_Lobe,1_TssA-Blood_&_T-cell-CD3_P…
chr1	148575301	149748529	pat_075	Gain	chr1	149576471	149576706	149576471	149576706	235	ncRNA_exonic	LINC00623,LINC00869	Bird_HAR437	HAR_Merge50-00118	5_TxWk-HSC_&_B-cell-CD19_Primary_Cells_Peripheral_UW,15_Quies-ES-deriv-hESC_Derived_CD56+_Mesoderm_Cultured_Cells,1_TssA-ENCODE2012-Osteoblasts,15_Quies-Other-Pancreas,15_Quies-Digestive-Rectal_Mucosa.Donor_29,1_TssA-ES-deriv-hESC_Derived_CD56+_Mesoderm_Cultured_Cells,15_Quies-Sm._Muscle-Duodenum_Smooth_Muscle,15_Quies-Other-Spleen,15_Quies-Brain-Brain_Mid_Frontal_Lobe,1_TssA-Blood_&_T-cell-CD3_P…
chr1	148627023	149748529	pat_076	Gain	chr1	149576471	149576706	149576471	149576706	235	ncRNA_exonic	LINC00623,LINC00869	Bird_HAR437	HAR_Merge50-00118	5_TxWk-HSC_&_B-cell-CD19_Primary_Cells_Peripheral_UW,15_Quies-ES-deriv-hESC_Derived_CD56+_Mesoderm_Cultured_Cells,1_TssA-ENCODE2012-Osteoblasts,15_Quies-Other-Pancreas,15_Quies-Digestive-Rectal_Mucosa.Donor_29,1_TssA-ES-deriv-hESC_Derived_CD56+_Mesoderm_Cultured_Cells,15_Quies-Sm._Muscle-Duodenum_Smooth_Muscle,15_Quies-Other-Spleen,15_Quies-Brain-Brain_Mid_Frontal_Lobe,1_TssA-Blood_&_T-cell-CD3_P…
chr1	157683713	157712236	pat_010	Gain	chr1	157694098	157694333	157694098	157694333	235	intergenic	FCRL3,FCRL2	Bird_HAR36	HAR_Merge50-00119	9_Het-Epithelial-Penis_Foreskin_Fibroblast_Primary_Cells_skin02,15_Quies-ES-deriv-hESC_Derived_CD56+_Mesoderm_Cultured_Cells,15_Quies-Other-Pancreas,15_Quies-Digestive-Rectal_Mucosa.Donor_29,5_TxWk-Blood_&_T-cell-CD3_Primary_Cells_Cord_BI,15_Quies-Sm._Muscle-Duodenum_Smooth_Muscle,14_ReprPCWk-ENCODE2012-A549_EtOH_0.02pct_Lung_Carcinoma,15_Quies-Other-Spleen,15_Quies-Brain-Brain_Mid_Frontal_Lobe,1…
chr1	158137453	158153526	pat_077	Loss	chr1	158145111	158145257	158145111	158145257	146	intergenic	LOC646268,CD1D	Bird_HAR438	HAR_Merge50-00120	14_ReprPCWk-Neurosph-Neurosphere_Cultured_Cells_Ganglionic_Eminence_Derived,15_Quies-Other-Pancreas,14_ReprPCWk-ENCODE2012-A549_EtOH_0.02pct_Lung_Carcinoma,15_Quies-Other-Spleen,14_ReprPCWk-Mesench-Bone_Marrow_Derived_Mesenchymal_Stem_Cell_Cultured_Cells,15_Quies-Sm._Muscle-Rectal_Smooth_Muscle,15_Quies-HSC_&_B-cell-CD14_Primary_Cells,14_ReprPCWk-Digestive-Sigmoid_Colon,14_ReprPCWk-ESC-HUES48_Cel…	CD1D,C1orf204,DUSP23
chr1	158137453	158153526	pat_078	Loss	chr1	158145111	158145257	158145111	158145257	146	intergenic	LOC646268,CD1D	Bird_HAR438	HAR_Merge50-00120	14_ReprPCWk-Neurosph-Neurosphere_Cultured_Cells_Ganglionic_Eminence_Derived,15_Quies-Other-Pancreas,14_ReprPCWk-ENCODE2012-A549_EtOH_0.02pct_Lung_Carcinoma,15_Quies-Other-Spleen,14_ReprPCWk-Mesench-Bone_Marrow_Derived_Mesenchymal_Stem_Cell_Cultured_Cells,15_Quies-Sm._Muscle-Rectal_Smooth_Muscle,15_Quies-HSC_&_B-cell-CD14_Primary_Cells,14_ReprPCWk-Digestive-Sigmoid_Colon,14_ReprPCWk-ESC-HUES48_Cel…	CD1D,C1orf204,DUSP23
chr1	158137453	158153526	pat_079	Loss	chr1	158145111	158145257	158145111	158145257	146	intergenic	LOC646268,CD1D	Bird_HAR438	HAR_Merge50-00120	14_ReprPCWk-Neurosph-Neurosphere_Cultured_Cells_Ganglionic_Eminence_Derived,15_Quies-Other-Pancreas,14_ReprPCWk-ENCODE2012-A549_EtOH_0.02pct_Lung_Carcinoma,15_Quies-Other-Spleen,14_ReprPCWk-Mesench-Bone_Marrow_Derived_Mesenchymal_Stem_Cell_Cultured_Cells,15_Quies-Sm._Muscle-Rectal_Smooth_Muscle,15_Quies-HSC_&_B-cell-CD14_Primary_Cells,14_ReprPCWk-Digestive-Sigmoid_Colon,14_ReprPCWk-ESC-HUES48_Cel…	CD1D,C1orf204,DUSP23
chr1	158137453	158153526	pat_080	Loss	chr1	158145111	158145257	158145111	158145257	146	intergenic	LOC646268,CD1D	Bird_HAR438	HAR_Merge50-00120	14_ReprPCWk-Neurosph-Neurosphere_Cultured_Cells_Ganglionic_Eminence_Derived,15_Quies-Other-Pancreas,14_ReprPCWk-ENCODE2012-A549_EtOH_0.02pct_Lung_Carcinoma,15_Quies-Other-Spleen,14_ReprPCWk-Mesench-Bone_Marrow_Derived_Mesenchymal_Stem_Cell_Cultured_Cells,15_Quies-Sm._Muscle-Rectal_Smooth_Muscle,15_Quies-HSC_&_B-cell-CD14_Primary_Cells,14_ReprPCWk-Digestive-Sigmoid_Colon,14_ReprPCWk-ESC-HUES48_Cel…	CD1D,C1orf204,DUSP23
chr1	158137453	158153526	pat_081	Loss	chr1	158145111	158145257	158145111	158145257	146	intergenic	LOC646268,CD1D	Bird_HAR438	HAR_Merge50-00120	14_ReprPCWk-Neurosph-Neurosphere_Cultured_Cells_Ganglionic_Eminence_Derived,15_Quies-Other-Pancreas,14_ReprPCWk-ENCODE2012-A549_EtOH_0.02pct_Lung_Carcinoma,15_Quies-Other-Spleen,14_ReprPCWk-Mesench-Bone_Marrow_Derived_Mesenchymal_Stem_Cell_Cultured_Cells,15_Quies-Sm._Muscle-Rectal_Smooth_Muscle,15_Quies-HSC_&_B-cell-CD14_Primary_Cells,14_ReprPCWk-Digestive-Sigmoid_Colon,14_ReprPCWk-ESC-HUES48_Cel…	CD1D,C1orf204,DUSP23
chr1	163140878	163310797	pat_010	Loss	chr1	163207616	163207928	163207616	163207928	312	intronic	RGS5	Bird_HAR439	HAR_Merge50-00121	15_Quies-ES-deriv-hESC_Derived_CD56+_Mesoderm_Cultured_Cells,15_Quies-Other-Pancreas,15_Quies-Digestive-Rectal_Mucosa.Donor_29,15_Quies-Sm._Muscle-Duodenum_Smooth_Muscle,15_Quies-Other-Spleen,15_Quies-Brain-Brain_Mid_Frontal_Lobe,15_Quies-Sm._Muscle-Rectal_Smooth_Muscle,15_Quies-ENCODE2012-HeLa-S3_Cervical_Carcinoma,15_Quies-iPSC-iPS-20b_Cell_Line,15_Quies-HSC_&_B-cell-CD15_Primary_Cells,15_Quies…
chr1	163519884	163638963	pat_010	Loss	chr1	163534095	163534315	163534095	163534315	220	intergenic	LOC100422212,PBX1	Prabhakar_HAR29	HAR_Merge50-00122	15_Quies-ES-deriv-hESC_Derived_CD56+_Mesoderm_Cultured_Cells,14_ReprPCWk-ENCODE2012-Dnd41_TCell_Leukemia,15_Quies-Other-Pancreas,15_Quies-Digestive-Rectal_Mucosa.Donor_29,15_Quies-Sm._Muscle-Duodenum_Smooth_Muscle,15_Quies-Other-Spleen,15_Quies-Brain-Brain_Mid_Frontal_Lobe,15_Quies-Sm._Muscle-Rectal_Smooth_Muscle,15_Quies-HSC_&_B-cell-CD14_Primary_Cells,15_Quies-HSC_&_B-cell-CD15_Primary_Cells,5_…
chr1	164311973	164375044	pat_010	Gain	chr1	164350238	164350495	164350238	164350495	257	intergenic	LOC100422212,PBX1	Pollard_HAR66,Bird_HAR152,BUSH_HAR63	HAR_Merge50-00123	15_Quies-ES-deriv-hESC_Derived_CD56+_Mesoderm_Cultured_Cells,15_Quies-Other-Pancreas,15_Quies-Digestive-Rectal_Mucosa.Donor_29,15_Quies-Sm._Muscle-Duodenum_Smooth_Muscle,15_Quies-Other-Spleen,15_Quies-Brain-Brain_Mid_Frontal_Lobe,15_Quies-Sm._Muscle-Rectal_Smooth_Muscle,15_Quies-HSC_&_B-cell-CD14_Primary_Cells,15_Quies-iPSC-iPS-20b_Cell_Line,15_Quies-HSC_&_B-cell-CD15_Primary_Cells,15_Quies-ESC-E…
chr1	164459830	164551395	pat_010	Loss	chr1	164533165	164533283	164533165	164533283	118	intronic	PBX1	Pollard_HAR155	HAR_Merge50-00124	5_TxWk-Digestive-Colonic_Mucosa,2_TssAFlnk-iPSC-iPS-15b_Cell_Line,14_ReprPCWk-HSC_&_B-cell-CD19_Primary_Cells_Peripheral_UW,14_ReprPCWk-ENCODE2012-Dnd41_TCell_Leukemia,13_ReprPC-HSC_&_B-cell-CD14_Primary_Cells,1_TssA-Heart-Fetal_Heart,2_TssAFlnk-Digestive-Fetal_Intestine_Large,2_TssAFlnk-iPSC-iPS-18_Cell_Line,1_TssA-Other-Placenta_Amnion,15_Quies-Other-Spleen,2_TssAFlnk-ESC-HUES6_Cell_Line,1_TssA…
chr1	170611056	170627540	pat_010	Loss	chr1	170612084	170612280	170612084	170612280	196	intergenic	GORAB,PRRX1	Bird_HAR440	HAR_Merge50-00125	15_Quies-ES-deriv-hESC_Derived_CD56+_Mesoderm_Cultured_Cells,15_Quies-Other-Pancreas,15_Quies-Digestive-Rectal_Mucosa.Donor_29,15_Quies-Sm._Muscle-Duodenum_Smooth_Muscle,15_Quies-Other-Spleen,15_Quies-Brain-Brain_Mid_Frontal_Lobe,15_Quies-Sm._Muscle-Rectal_Smooth_Muscle,15_Quies-ENCODE2012-HeLa-S3_Cervical_Carcinoma,15_Quies-HSC_&_B-cell-CD14_Primary_Cells,15_Quies-iPSC-iPS-20b_Cell_Line,15_Quies…
chr1	170698769	170733269	pat_010	Gain	chr1	170717505	170717867	170717505	170717867	362	intergenic	PRRX1,MROH9	Bird_HAR441	HAR_Merge50-00126	15_Quies-ES-deriv-hESC_Derived_CD56+_Mesoderm_Cultured_Cells,15_Quies-Other-Pancreas,15_Quies-Digestive-Rectal_Mucosa.Donor_29,15_Quies-Sm._Muscle-Duodenum_Smooth_Muscle,15_Quies-Other-Spleen,15_Quies-Brain-Brain_Mid_Frontal_Lobe,15_Quies-Sm._Muscle-Rectal_Smooth_Muscle,15_Quies-ENCODE2012-HeLa-S3_Cervical_Carcinoma,15_Quies-HSC_&_B-cell-CD14_Primary_Cells,15_Quies-iPSC-iPS-20b_Cell_Line,15_Quies…
chr1	175430197	175752852	pat_082	Gain	chr1	175535112	175535518	175535112	175535518	406	intronic	TNR	Prabhakar_HAR162	HAR_Merge50-00128	15_Quies-ES-deriv-hESC_Derived_CD56+_Mesoderm_Cultured_Cells,14_ReprPCWk-Muscle-Fetal_Muscle_Trunk,15_Quies-Digestive-Rectal_Mucosa.Donor_29,5_TxWk-ES-deriv-hESC_Derived_CD56+_Ectoderm_Cultured_Cells,15_Quies-Sm._Muscle-Duodenum_Smooth_Muscle,15_Quies-Other-Spleen,15_Quies-Brain-Brain_Mid_Frontal_Lobe,15_Quies-Sm._Muscle-Rectal_Smooth_Muscle,15_Quies-HSC_&_B-cell-CD14_Primary_Cells,15_Quies-HSC_&…
chr1	175430197	175752852	pat_082	Gain	chr1	175704682	175704908	175704682	175704908	226	intronic	TNR	Bird_HAR153,Prabhakar_HAR87	HAR_Merge50-00129	9_Het-Epithelial-Penis_Foreskin_Fibroblast_Primary_Cells_skin02,14_ReprPCWk-Neurosph-Neurosphere_Cultured_Cells_Ganglionic_Eminence_Derived,14_ReprPCWk-Muscle-Fetal_Muscle_Trunk,14_ReprPCWk-HSC_&_B-cell-CD19_Primary_Cells_Peripheral_UW,15_Quies-Other-Pancreas,15_Quies-Digestive-Rectal_Mucosa.Donor_29,7_Enh-Other-Adult_Liver,15_Quies-Sm._Muscle-Duodenum_Smooth_Muscle,15_Quies-Other-Spleen,15_Quies…	TNR
chr1	175430197	175752852	pat_082	Gain	chr1	175722739	175722898	175722739	175722898	159	intergenic	TNR,RFWD2	Bird_HAR443	HAR_Merge50-00130	14_ReprPCWk-Muscle-Fetal_Muscle_Trunk,15_Quies-Other-Pancreas,14_ReprPCWk-ENCODE2012-Dnd41_TCell_Leukemia,15_Quies-Digestive-Rectal_Mucosa.Donor_29,15_Quies-Other-Spleen,14_ReprPCWk-ENCODE2012-A549_EtOH_0.02pct_Lung_Carcinoma,15_Quies-Sm._Muscle-Rectal_Smooth_Muscle,15_Quies-HSC_&_B-cell-CD14_Primary_Cells,14_ReprPCWk-Heart-Left_Ventricle,15_Quies-HSC_&_B-cell-CD15_Primary_Cells,14_ReprPCWk-Diges…
chr1	175430197	175759655	pat_083	Gain	chr1	175535112	175535518	175535112	175535518	406	intronic	TNR	Prabhakar_HAR162	HAR_Merge50-00128	15_Quies-ES-deriv-hESC_Derived_CD56+_Mesoderm_Cultured_Cells,14_ReprPCWk-Muscle-Fetal_Muscle_Trunk,15_Quies-Digestive-Rectal_Mucosa.Donor_29,5_TxWk-ES-deriv-hESC_Derived_CD56+_Ectoderm_Cultured_Cells,15_Quies-Sm._Muscle-Duodenum_Smooth_Muscle,15_Quies-Other-Spleen,15_Quies-Brain-Brain_Mid_Frontal_Lobe,15_Quies-Sm._Muscle-Rectal_Smooth_Muscle,15_Quies-HSC_&_B-cell-CD14_Primary_Cells,15_Quies-HSC_&…
chr1	175430197	175759655	pat_083	Gain	chr1	175704682	175704908	175704682	175704908	226	intronic	TNR	Bird_HAR153,Prabhakar_HAR87	HAR_Merge50-00129	9_Het-Epithelial-Penis_Foreskin_Fibroblast_Primary_Cells_skin02,14_ReprPCWk-Neurosph-Neurosphere_Cultured_Cells_Ganglionic_Eminence_Derived,14_ReprPCWk-Muscle-Fetal_Muscle_Trunk,14_ReprPCWk-HSC_&_B-cell-CD19_Primary_Cells_Peripheral_UW,15_Quies-Other-Pancreas,15_Quies-Digestive-Rectal_Mucosa.Donor_29,7_Enh-Other-Adult_Liver,15_Quies-Sm._Muscle-Duodenum_Smooth_Muscle,15_Quies-Other-Spleen,15_Quies…	TNR
chr1	175430197	175759655	pat_083	Gain	chr1	175722739	175722898	175722739	175722898	159	intergenic	TNR,RFWD2	Bird_HAR443	HAR_Merge50-00130	14_ReprPCWk-Muscle-Fetal_Muscle_Trunk,15_Quies-Other-Pancreas,14_ReprPCWk-ENCODE2012-Dnd41_TCell_Leukemia,15_Quies-Digestive-Rectal_Mucosa.Donor_29,15_Quies-Other-Spleen,14_ReprPCWk-ENCODE2012-A549_EtOH_0.02pct_Lung_Carcinoma,15_Quies-Sm._Muscle-Rectal_Smooth_Muscle,15_Quies-HSC_&_B-cell-CD14_Primary_Cells,14_ReprPCWk-Heart-Left_Ventricle,15_Quies-HSC_&_B-cell-CD15_Primary_Cells,14_ReprPCWk-Diges…
chr1	175430197	175759655	pat_084	Gain	chr1	175535112	175535518	175535112	175535518	406	intronic	TNR	Prabhakar_HAR162	HAR_Merge50-00128	15_Quies-ES-deriv-hESC_Derived_CD56+_Mesoderm_Cultured_Cells,14_ReprPCWk-Muscle-Fetal_Muscle_Trunk,15_Quies-Digestive-Rectal_Mucosa.Donor_29,5_TxWk-ES-deriv-hESC_Derived_CD56+_Ectoderm_Cultured_Cells,15_Quies-Sm._Muscle-Duodenum_Smooth_Muscle,15_Quies-Other-Spleen,15_Quies-Brain-Brain_Mid_Frontal_Lobe,15_Quies-Sm._Muscle-Rectal_Smooth_Muscle,15_Quies-HSC_&_B-cell-CD14_Primary_Cells,15_Quies-HSC_&…
chr1	175430197	175759655	pat_084	Gain	chr1	175704682	175704908	175704682	175704908	226	intronic	TNR	Bird_HAR153,Prabhakar_HAR87	HAR_Merge50-00129	9_Het-Epithelial-Penis_Foreskin_Fibroblast_Primary_Cells_skin02,14_ReprPCWk-Neurosph-Neurosphere_Cultured_Cells_Ganglionic_Eminence_Derived,14_ReprPCWk-Muscle-Fetal_Muscle_Trunk,14_ReprPCWk-HSC_&_B-cell-CD19_Primary_Cells_Peripheral_UW,15_Quies-Other-Pancreas,15_Quies-Digestive-Rectal_Mucosa.Donor_29,7_Enh-Other-Adult_Liver,15_Quies-Sm._Muscle-Duodenum_Smooth_Muscle,15_Quies-Other-Spleen,15_Quies…	TNR
chr1	175430197	175759655	pat_084	Gain	chr1	175722739	175722898	175722739	175722898	159	intergenic	TNR,RFWD2	Bird_HAR443	HAR_Merge50-00130	14_ReprPCWk-Muscle-Fetal_Muscle_Trunk,15_Quies-Other-Pancreas,14_ReprPCWk-ENCODE2012-Dnd41_TCell_Leukemia,15_Quies-Digestive-Rectal_Mucosa.Donor_29,15_Quies-Other-Spleen,14_ReprPCWk-ENCODE2012-A549_EtOH_0.02pct_Lung_Carcinoma,15_Quies-Sm._Muscle-Rectal_Smooth_Muscle,15_Quies-HSC_&_B-cell-CD14_Primary_Cells,14_ReprPCWk-Heart-Left_Ventricle,15_Quies-HSC_&_B-cell-CD15_Primary_Cells,14_ReprPCWk-Diges…
chr1	175430197	175759655	pat_085	Gain	chr1	175535112	175535518	175535112	175535518	406	intronic	TNR	Prabhakar_HAR162	HAR_Merge50-00128	15_Quies-ES-deriv-hESC_Derived_CD56+_Mesoderm_Cultured_Cells,14_ReprPCWk-Muscle-Fetal_Muscle_Trunk,15_Quies-Digestive-Rectal_Mucosa.Donor_29,5_TxWk-ES-deriv-hESC_Derived_CD56+_Ectoderm_Cultured_Cells,15_Quies-Sm._Muscle-Duodenum_Smooth_Muscle,15_Quies-Other-Spleen,15_Quies-Brain-Brain_Mid_Frontal_Lobe,15_Quies-Sm._Muscle-Rectal_Smooth_Muscle,15_Quies-HSC_&_B-cell-CD14_Primary_Cells,15_Quies-HSC_&…
chr1	175430197	175759655	pat_085	Gain	chr1	175704682	175704908	175704682	175704908	226	intronic	TNR	Bird_HAR153,Prabhakar_HAR87	HAR_Merge50-00129	9_Het-Epithelial-Penis_Foreskin_Fibroblast_Primary_Cells_skin02,14_ReprPCWk-Neurosph-Neurosphere_Cultured_Cells_Ganglionic_Eminence_Derived,14_ReprPCWk-Muscle-Fetal_Muscle_Trunk,14_ReprPCWk-HSC_&_B-cell-CD19_Primary_Cells_Peripheral_UW,15_Quies-Other-Pancreas,15_Quies-Digestive-Rectal_Mucosa.Donor_29,7_Enh-Other-Adult_Liver,15_Quies-Sm._Muscle-Duodenum_Smooth_Muscle,15_Quies-Other-Spleen,15_Quies…	TNR
chr1	175430197	175759655	pat_085	Gain	chr1	175722739	175722898	175722739	175722898	159	intergenic	TNR,RFWD2	Bird_HAR443	HAR_Merge50-00130	14_ReprPCWk-Muscle-Fetal_Muscle_Trunk,15_Quies-Other-Pancreas,14_ReprPCWk-ENCODE2012-Dnd41_TCell_Leukemia,15_Quies-Digestive-Rectal_Mucosa.Donor_29,15_Quies-Other-Spleen,14_ReprPCWk-ENCODE2012-A549_EtOH_0.02pct_Lung_Carcinoma,15_Quies-Sm._Muscle-Rectal_Smooth_Muscle,15_Quies-HSC_&_B-cell-CD14_Primary_Cells,14_ReprPCWk-Heart-Left_Ventricle,15_Quies-HSC_&_B-cell-CD15_Primary_Cells,14_ReprPCWk-Diges…
chr1	175430197	175759655	pat_086	Gain	chr1	175535112	175535518	175535112	175535518	406	intronic	TNR	Prabhakar_HAR162	HAR_Merge50-00128	15_Quies-ES-deriv-hESC_Derived_CD56+_Mesoderm_Cultured_Cells,14_ReprPCWk-Muscle-Fetal_Muscle_Trunk,15_Quies-Digestive-Rectal_Mucosa.Donor_29,5_TxWk-ES-deriv-hESC_Derived_CD56+_Ectoderm_Cultured_Cells,15_Quies-Sm._Muscle-Duodenum_Smooth_Muscle,15_Quies-Other-Spleen,15_Quies-Brain-Brain_Mid_Frontal_Lobe,15_Quies-Sm._Muscle-Rectal_Smooth_Muscle,15_Quies-HSC_&_B-cell-CD14_Primary_Cells,15_Quies-HSC_&…
chr1	175430197	175759655	pat_086	Gain	chr1	175704682	175704908	175704682	175704908	226	intronic	TNR	Bird_HAR153,Prabhakar_HAR87	HAR_Merge50-00129	9_Het-Epithelial-Penis_Foreskin_Fibroblast_Primary_Cells_skin02,14_ReprPCWk-Neurosph-Neurosphere_Cultured_Cells_Ganglionic_Eminence_Derived,14_ReprPCWk-Muscle-Fetal_Muscle_Trunk,14_ReprPCWk-HSC_&_B-cell-CD19_Primary_Cells_Peripheral_UW,15_Quies-Other-Pancreas,15_Quies-Digestive-Rectal_Mucosa.Donor_29,7_Enh-Other-Adult_Liver,15_Quies-Sm._Muscle-Duodenum_Smooth_Muscle,15_Quies-Other-Spleen,15_Quies…	TNR
chr1	175430197	175759655	pat_086	Gain	chr1	175722739	175722898	175722739	175722898	159	intergenic	TNR,RFWD2	Bird_HAR443	HAR_Merge50-00130	14_ReprPCWk-Muscle-Fetal_Muscle_Trunk,15_Quies-Other-Pancreas,14_ReprPCWk-ENCODE2012-Dnd41_TCell_Leukemia,15_Quies-Digestive-Rectal_Mucosa.Donor_29,15_Quies-Other-Spleen,14_ReprPCWk-ENCODE2012-A549_EtOH_0.02pct_Lung_Carcinoma,15_Quies-Sm._Muscle-Rectal_Smooth_Muscle,15_Quies-HSC_&_B-cell-CD14_Primary_Cells,14_ReprPCWk-Heart-Left_Ventricle,15_Quies-HSC_&_B-cell-CD15_Primary_Cells,14_ReprPCWk-Diges…
chr1	175535209	175540582	pat_010	Gain	chr1	175535112	175535518	175535209	175535518	309	intronic	TNR	Prabhakar_HAR162	HAR_Merge50-00128	15_Quies-ES-deriv-hESC_Derived_CD56+_Mesoderm_Cultured_Cells,14_ReprPCWk-Muscle-Fetal_Muscle_Trunk,15_Quies-Digestive-Rectal_Mucosa.Donor_29,5_TxWk-ES-deriv-hESC_Derived_CD56+_Ectoderm_Cultured_Cells,15_Quies-Sm._Muscle-Duodenum_Smooth_Muscle,15_Quies-Other-Spleen,15_Quies-Brain-Brain_Mid_Frontal_Lobe,15_Quies-Sm._Muscle-Rectal_Smooth_Muscle,15_Quies-HSC_&_B-cell-CD14_Primary_Cells,15_Quies-HSC_&…
chr1	175642443	175759655	pat_010	Gain	chr1	175704682	175704908	175704682	175704908	226	intronic	TNR	Bird_HAR153,Prabhakar_HAR87	HAR_Merge50-00129	9_Het-Epithelial-Penis_Foreskin_Fibroblast_Primary_Cells_skin02,14_ReprPCWk-Neurosph-Neurosphere_Cultured_Cells_Ganglionic_Eminence_Derived,14_ReprPCWk-Muscle-Fetal_Muscle_Trunk,14_ReprPCWk-HSC_&_B-cell-CD19_Primary_Cells_Peripheral_UW,15_Quies-Other-Pancreas,15_Quies-Digestive-Rectal_Mucosa.Donor_29,7_Enh-Other-Adult_Liver,15_Quies-Sm._Muscle-Duodenum_Smooth_Muscle,15_Quies-Other-Spleen,15_Quies…	TNR
chr1	175642443	175759655	pat_010	Gain	chr1	175722739	175722898	175722739	175722898	159	intergenic	TNR,RFWD2	Bird_HAR443	HAR_Merge50-00130	14_ReprPCWk-Muscle-Fetal_Muscle_Trunk,15_Quies-Other-Pancreas,14_ReprPCWk-ENCODE2012-Dnd41_TCell_Leukemia,15_Quies-Digestive-Rectal_Mucosa.Donor_29,15_Quies-Other-Spleen,14_ReprPCWk-ENCODE2012-A549_EtOH_0.02pct_Lung_Carcinoma,15_Quies-Sm._Muscle-Rectal_Smooth_Muscle,15_Quies-HSC_&_B-cell-CD14_Primary_Cells,14_ReprPCWk-Heart-Left_Ventricle,15_Quies-HSC_&_B-cell-CD15_Primary_Cells,14_ReprPCWk-Diges…
chr1	177003237	177010695	pat_010	Loss	chr1	177009234	177009502	177009234	177009502	268	intronic	ASTN1	Bird_HAR444,Prabhakar_HAR243	HAR_Merge50-00131	15_Quies-ES-deriv-hESC_Derived_CD56+_Mesoderm_Cultured_Cells,14_ReprPCWk-Muscle-Fetal_Muscle_Trunk,15_Quies-Other-Pancreas,15_Quies-Digestive-Rectal_Mucosa.Donor_29,15_Quies-Sm._Muscle-Duodenum_Smooth_Muscle,15_Quies-Other-Spleen,14_ReprPCWk-ENCODE2012-A549_EtOH_0.02pct_Lung_Carcinoma,15_Quies-Sm._Muscle-Rectal_Smooth_Muscle,15_Quies-HSC_&_B-cell-CD14_Primary_Cells,15_Quies-iPSC-iPS-20b_Cell_Line…	RALGPS2,FAM20B
chr1	177546404	177582860	pat_010	Gain	chr1	177580823	177581149	177580823	177581149	326	intergenic	BRINP2,SEC16B	Bird_HAR446	HAR_Merge50-00134	15_Quies-ES-deriv-hESC_Derived_CD56+_Mesoderm_Cultured_Cells,15_Quies-Other-Pancreas,15_Quies-Digestive-Rectal_Mucosa.Donor_29,15_Quies-Sm._Muscle-Duodenum_Smooth_Muscle,15_Quies-Other-Spleen,15_Quies-Brain-Brain_Mid_Frontal_Lobe,14_ReprPCWk-Mesench-Bone_Marrow_Derived_Mesenchymal_Stem_Cell_Cultured_Cells,15_Quies-Sm._Muscle-Rectal_Smooth_Muscle,15_Quies-ENCODE2012-HeLa-S3_Cervical_Carcinoma,15_Q…
chr1	178294785	178373643	pat_010	Loss	chr1	178363595	178363891	178363595	178363891	296	intronic	RASAL2	Bird_HAR447	HAR_Merge50-00136	15_Quies-ES-deriv-hESC_Derived_CD56+_Mesoderm_Cultured_Cells,5_TxWk-Heart-Left_Ventricle,14_ReprPCWk-ENCODE2012-Dnd41_TCell_Leukemia,15_Quies-Digestive-Rectal_Mucosa.Donor_29,5_TxWk-Epithelial-Penis_Foreskin_Fibroblast_Primary_Cells_skin02,15_Quies-Sm._Muscle-Duodenum_Smooth_Muscle,15_Quies-Other-Spleen,15_Quies-Brain-Brain_Mid_Frontal_Lobe,15_Quies-Sm._Muscle-Rectal_Smooth_Muscle,15_Quies-ENCODE…
chr1	181769540	181778151	pat_010	Gain	chr1	181777911	181778155	181777911	181778151	240	intergenic	CACNA1E,ZNF648	Prabhakar_HAR568	HAR_Merge50-00137	15_Quies-ES-deriv-hESC_Derived_CD56+_Mesoderm_Cultured_Cells,14_ReprPCWk-ENCODE2012-Dnd41_TCell_Leukemia,15_Quies-Other-Pancreas,15_Quies-Digestive-Rectal_Mucosa.Donor_29,15_Quies-Sm._Muscle-Duodenum_Smooth_Muscle,14_ReprPCWk-ENCODE2012-A549_EtOH_0.02pct_Lung_Carcinoma,15_Quies-Other-Spleen,15_Quies-Brain-Brain_Mid_Frontal_Lobe,15_Quies-Sm._Muscle-Rectal_Smooth_Muscle,15_Quies-HSC_&_B-cell-CD14_P…	SMG7,LAMC1
chr1	188549941	188606462	pat_010	Loss	chr1	188602203	188602416	188602203	188602416	213	intergenic	PLA2G4A,BRINP3	Prabhakar_HAR608	HAR_Merge50-00138	15_Quies-ES-deriv-hESC_Derived_CD56+_Mesoderm_Cultured_Cells,15_Quies-Other-Pancreas,15_Quies-Digestive-Rectal_Mucosa.Donor_29,15_Quies-Sm._Muscle-Duodenum_Smooth_Muscle,15_Quies-Other-Spleen,15_Quies-Brain-Brain_Mid_Frontal_Lobe,15_Quies-Sm._Muscle-Rectal_Smooth_Muscle,15_Quies-ENCODE2012-HeLa-S3_Cervical_Carcinoma,15_Quies-HSC_&_B-cell-CD14_Primary_Cells,15_Quies-iPSC-iPS-20b_Cell_Line,15_Quies…
chr1	188555678	189015807	pat_087	Gain	chr1	188602203	188602416	188602203	188602416	213	intergenic	PLA2G4A,BRINP3	Prabhakar_HAR608	HAR_Merge50-00138	15_Quies-ES-deriv-hESC_Derived_CD56+_Mesoderm_Cultured_Cells,15_Quies-Other-Pancreas,15_Quies-Digestive-Rectal_Mucosa.Donor_29,15_Quies-Sm._Muscle-Duodenum_Smooth_Muscle,15_Quies-Other-Spleen,15_Quies-Brain-Brain_Mid_Frontal_Lobe,15_Quies-Sm._Muscle-Rectal_Smooth_Muscle,15_Quies-ENCODE2012-HeLa-S3_Cervical_Carcinoma,15_Quies-HSC_&_B-cell-CD14_Primary_Cells,15_Quies-iPSC-iPS-20b_Cell_Line,15_Quies…
chr1	188594051	188606462	pat_036	Loss	chr1	188602203	188602416	188602203	188602416	213	intergenic	PLA2G4A,BRINP3	Prabhakar_HAR608	HAR_Merge50-00138	15_Quies-ES-deriv-hESC_Derived_CD56+_Mesoderm_Cultured_Cells,15_Quies-Other-Pancreas,15_Quies-Digestive-Rectal_Mucosa.Donor_29,15_Quies-Sm._Muscle-Duodenum_Smooth_Muscle,15_Quies-Other-Spleen,15_Quies-Brain-Brain_Mid_Frontal_Lobe,15_Quies-Sm._Muscle-Rectal_Smooth_Muscle,15_Quies-ENCODE2012-HeLa-S3_Cervical_Carcinoma,15_Quies-HSC_&_B-cell-CD14_Primary_Cells,15_Quies-iPSC-iPS-20b_Cell_Line,15_Quies…
chr1	188594051	188606462	pat_088	Loss	chr1	188602203	188602416	188602203	188602416	213	intergenic	PLA2G4A,BRINP3	Prabhakar_HAR608	HAR_Merge50-00138	15_Quies-ES-deriv-hESC_Derived_CD56+_Mesoderm_Cultured_Cells,15_Quies-Other-Pancreas,15_Quies-Digestive-Rectal_Mucosa.Donor_29,15_Quies-Sm._Muscle-Duodenum_Smooth_Muscle,15_Quies-Other-Spleen,15_Quies-Brain-Brain_Mid_Frontal_Lobe,15_Quies-Sm._Muscle-Rectal_Smooth_Muscle,15_Quies-ENCODE2012-HeLa-S3_Cervical_Carcinoma,15_Quies-HSC_&_B-cell-CD14_Primary_Cells,15_Quies-iPSC-iPS-20b_Cell_Line,15_Quies…
chr1	188594051	188606462	pat_089	Loss	chr1	188602203	188602416	188602203	188602416	213	intergenic	PLA2G4A,BRINP3	Prabhakar_HAR608	HAR_Merge50-00138	15_Quies-ES-deriv-hESC_Derived_CD56+_Mesoderm_Cultured_Cells,15_Quies-Other-Pancreas,15_Quies-Digestive-Rectal_Mucosa.Donor_29,15_Quies-Sm._Muscle-Duodenum_Smooth_Muscle,15_Quies-Other-Spleen,15_Quies-Brain-Brain_Mid_Frontal_Lobe,15_Quies-Sm._Muscle-Rectal_Smooth_Muscle,15_Quies-ENCODE2012-HeLa-S3_Cervical_Carcinoma,15_Quies-HSC_&_B-cell-CD14_Primary_Cells,15_Quies-iPSC-iPS-20b_Cell_Line,15_Quies…
chr1	188594051	188606462	pat_090	Loss	chr1	188602203	188602416	188602203	188602416	213	intergenic	PLA2G4A,BRINP3	Prabhakar_HAR608	HAR_Merge50-00138	15_Quies-ES-deriv-hESC_Derived_CD56+_Mesoderm_Cultured_Cells,15_Quies-Other-Pancreas,15_Quies-Digestive-Rectal_Mucosa.Donor_29,15_Quies-Sm._Muscle-Duodenum_Smooth_Muscle,15_Quies-Other-Spleen,15_Quies-Brain-Brain_Mid_Frontal_Lobe,15_Quies-Sm._Muscle-Rectal_Smooth_Muscle,15_Quies-ENCODE2012-HeLa-S3_Cervical_Carcinoma,15_Quies-HSC_&_B-cell-CD14_Primary_Cells,15_Quies-iPSC-iPS-20b_Cell_Line,15_Quies…
chr1	188594051	188606462	pat_091	Loss	chr1	188602203	188602416	188602203	188602416	213	intergenic	PLA2G4A,BRINP3	Prabhakar_HAR608	HAR_Merge50-00138	15_Quies-ES-deriv-hESC_Derived_CD56+_Mesoderm_Cultured_Cells,15_Quies-Other-Pancreas,15_Quies-Digestive-Rectal_Mucosa.Donor_29,15_Quies-Sm._Muscle-Duodenum_Smooth_Muscle,15_Quies-Other-Spleen,15_Quies-Brain-Brain_Mid_Frontal_Lobe,15_Quies-Sm._Muscle-Rectal_Smooth_Muscle,15_Quies-ENCODE2012-HeLa-S3_Cervical_Carcinoma,15_Quies-HSC_&_B-cell-CD14_Primary_Cells,15_Quies-iPSC-iPS-20b_Cell_Line,15_Quies…
chr1	188594052	188606462	pat_092	Loss	chr1	188602203	188602416	188602203	188602416	213	intergenic	PLA2G4A,BRINP3	Prabhakar_HAR608	HAR_Merge50-00138	15_Quies-ES-deriv-hESC_Derived_CD56+_Mesoderm_Cultured_Cells,15_Quies-Other-Pancreas,15_Quies-Digestive-Rectal_Mucosa.Donor_29,15_Quies-Sm._Muscle-Duodenum_Smooth_Muscle,15_Quies-Other-Spleen,15_Quies-Brain-Brain_Mid_Frontal_Lobe,15_Quies-Sm._Muscle-Rectal_Smooth_Muscle,15_Quies-ENCODE2012-HeLa-S3_Cervical_Carcinoma,15_Quies-HSC_&_B-cell-CD14_Primary_Cells,15_Quies-iPSC-iPS-20b_Cell_Line,15_Quies…
chr1	188595673	188606463	pat_093	Loss	chr1	188602203	188602416	188602203	188602416	213	intergenic	PLA2G4A,BRINP3	Prabhakar_HAR608	HAR_Merge50-00138	15_Quies-ES-deriv-hESC_Derived_CD56+_Mesoderm_Cultured_Cells,15_Quies-Other-Pancreas,15_Quies-Digestive-Rectal_Mucosa.Donor_29,15_Quies-Sm._Muscle-Duodenum_Smooth_Muscle,15_Quies-Other-Spleen,15_Quies-Brain-Brain_Mid_Frontal_Lobe,15_Quies-Sm._Muscle-Rectal_Smooth_Muscle,15_Quies-ENCODE2012-HeLa-S3_Cervical_Carcinoma,15_Quies-HSC_&_B-cell-CD14_Primary_Cells,15_Quies-iPSC-iPS-20b_Cell_Line,15_Quies…
chr1	188595673	188606463	pat_094	Loss	chr1	188602203	188602416	188602203	188602416	213	intergenic	PLA2G4A,BRINP3	Prabhakar_HAR608	HAR_Merge50-00138	15_Quies-ES-deriv-hESC_Derived_CD56+_Mesoderm_Cultured_Cells,15_Quies-Other-Pancreas,15_Quies-Digestive-Rectal_Mucosa.Donor_29,15_Quies-Sm._Muscle-Duodenum_Smooth_Muscle,15_Quies-Other-Spleen,15_Quies-Brain-Brain_Mid_Frontal_Lobe,15_Quies-Sm._Muscle-Rectal_Smooth_Muscle,15_Quies-ENCODE2012-HeLa-S3_Cervical_Carcinoma,15_Quies-HSC_&_B-cell-CD14_Primary_Cells,15_Quies-iPSC-iPS-20b_Cell_Line,15_Quies…
chr1	188595673	188606463	pat_095	Loss	chr1	188602203	188602416	188602203	188602416	213	intergenic	PLA2G4A,BRINP3	Prabhakar_HAR608	HAR_Merge50-00138	15_Quies-ES-deriv-hESC_Derived_CD56+_Mesoderm_Cultured_Cells,15_Quies-Other-Pancreas,15_Quies-Digestive-Rectal_Mucosa.Donor_29,15_Quies-Sm._Muscle-Duodenum_Smooth_Muscle,15_Quies-Other-Spleen,15_Quies-Brain-Brain_Mid_Frontal_Lobe,15_Quies-Sm._Muscle-Rectal_Smooth_Muscle,15_Quies-ENCODE2012-HeLa-S3_Cervical_Carcinoma,15_Quies-HSC_&_B-cell-CD14_Primary_Cells,15_Quies-iPSC-iPS-20b_Cell_Line,15_Quies…
chr1	188595673	188606463	pat_096	Loss	chr1	188602203	188602416	188602203	188602416	213	intergenic	PLA2G4A,BRINP3	Prabhakar_HAR608	HAR_Merge50-00138	15_Quies-ES-deriv-hESC_Derived_CD56+_Mesoderm_Cultured_Cells,15_Quies-Other-Pancreas,15_Quies-Digestive-Rectal_Mucosa.Donor_29,15_Quies-Sm._Muscle-Duodenum_Smooth_Muscle,15_Quies-Other-Spleen,15_Quies-Brain-Brain_Mid_Frontal_Lobe,15_Quies-Sm._Muscle-Rectal_Smooth_Muscle,15_Quies-ENCODE2012-HeLa-S3_Cervical_Carcinoma,15_Quies-HSC_&_B-cell-CD14_Primary_Cells,15_Quies-iPSC-iPS-20b_Cell_Line,15_Quies…
chr1	188595673	188606463	pat_097	Loss	chr1	188602203	188602416	188602203	188602416	213	intergenic	PLA2G4A,BRINP3	Prabhakar_HAR608	HAR_Merge50-00138	15_Quies-ES-deriv-hESC_Derived_CD56+_Mesoderm_Cultured_Cells,15_Quies-Other-Pancreas,15_Quies-Digestive-Rectal_Mucosa.Donor_29,15_Quies-Sm._Muscle-Duodenum_Smooth_Muscle,15_Quies-Other-Spleen,15_Quies-Brain-Brain_Mid_Frontal_Lobe,15_Quies-Sm._Muscle-Rectal_Smooth_Muscle,15_Quies-ENCODE2012-HeLa-S3_Cervical_Carcinoma,15_Quies-HSC_&_B-cell-CD14_Primary_Cells,15_Quies-iPSC-iPS-20b_Cell_Line,15_Quies…
chr1	188595673	188606463	pat_098	Loss	chr1	188602203	188602416	188602203	188602416	213	intergenic	PLA2G4A,BRINP3	Prabhakar_HAR608	HAR_Merge50-00138	15_Quies-ES-deriv-hESC_Derived_CD56+_Mesoderm_Cultured_Cells,15_Quies-Other-Pancreas,15_Quies-Digestive-Rectal_Mucosa.Donor_29,15_Quies-Sm._Muscle-Duodenum_Smooth_Muscle,15_Quies-Other-Spleen,15_Quies-Brain-Brain_Mid_Frontal_Lobe,15_Quies-Sm._Muscle-Rectal_Smooth_Muscle,15_Quies-ENCODE2012-HeLa-S3_Cervical_Carcinoma,15_Quies-HSC_&_B-cell-CD14_Primary_Cells,15_Quies-iPSC-iPS-20b_Cell_Line,15_Quies…
chr1	188595673	188606463	pat_099	Loss	chr1	188602203	188602416	188602203	188602416	213	intergenic	PLA2G4A,BRINP3	Prabhakar_HAR608	HAR_Merge50-00138	15_Quies-ES-deriv-hESC_Derived_CD56+_Mesoderm_Cultured_Cells,15_Quies-Other-Pancreas,15_Quies-Digestive-Rectal_Mucosa.Donor_29,15_Quies-Sm._Muscle-Duodenum_Smooth_Muscle,15_Quies-Other-Spleen,15_Quies-Brain-Brain_Mid_Frontal_Lobe,15_Quies-Sm._Muscle-Rectal_Smooth_Muscle,15_Quies-ENCODE2012-HeLa-S3_Cervical_Carcinoma,15_Quies-HSC_&_B-cell-CD14_Primary_Cells,15_Quies-iPSC-iPS-20b_Cell_Line,15_Quies…
chr1	188595673	188606463	pat_100	Loss	chr1	188602203	188602416	188602203	188602416	213	intergenic	PLA2G4A,BRINP3	Prabhakar_HAR608	HAR_Merge50-00138	15_Quies-ES-deriv-hESC_Derived_CD56+_Mesoderm_Cultured_Cells,15_Quies-Other-Pancreas,15_Quies-Digestive-Rectal_Mucosa.Donor_29,15_Quies-Sm._Muscle-Duodenum_Smooth_Muscle,15_Quies-Other-Spleen,15_Quies-Brain-Brain_Mid_Frontal_Lobe,15_Quies-Sm._Muscle-Rectal_Smooth_Muscle,15_Quies-ENCODE2012-HeLa-S3_Cervical_Carcinoma,15_Quies-HSC_&_B-cell-CD14_Primary_Cells,15_Quies-iPSC-iPS-20b_Cell_Line,15_Quies…
chr1	188595673	188606463	pat_101	Loss	chr1	188602203	188602416	188602203	188602416	213	intergenic	PLA2G4A,BRINP3	Prabhakar_HAR608	HAR_Merge50-00138	15_Quies-ES-deriv-hESC_Derived_CD56+_Mesoderm_Cultured_Cells,15_Quies-Other-Pancreas,15_Quies-Digestive-Rectal_Mucosa.Donor_29,15_Quies-Sm._Muscle-Duodenum_Smooth_Muscle,15_Quies-Other-Spleen,15_Quies-Brain-Brain_Mid_Frontal_Lobe,15_Quies-Sm._Muscle-Rectal_Smooth_Muscle,15_Quies-ENCODE2012-HeLa-S3_Cervical_Carcinoma,15_Quies-HSC_&_B-cell-CD14_Primary_Cells,15_Quies-iPSC-iPS-20b_Cell_Line,15_Quies…
chr1	195797212	195927611	pat_010	Loss	chr1	195873029	195873226	195873029	195873226	197	intergenic	NONE,KCNT2	Bird_HAR449	HAR_Merge50-00142	15_Quies-ES-deriv-hESC_Derived_CD56+_Mesoderm_Cultured_Cells,15_Quies-Other-Pancreas,15_Quies-Digestive-Rectal_Mucosa.Donor_29,15_Quies-Sm._Muscle-Duodenum_Smooth_Muscle,15_Quies-Other-Spleen,15_Quies-Brain-Brain_Mid_Frontal_Lobe,15_Quies-Sm._Muscle-Rectal_Smooth_Muscle,15_Quies-ENCODE2012-HeLa-S3_Cervical_Carcinoma,15_Quies-HSC_&_B-cell-CD14_Primary_Cells,15_Quies-iPSC-iPS-20b_Cell_Line,15_Quies…
chr1	195823042	195876205	pat_102	Loss	chr1	195873029	195873226	195873029	195873226	197	intergenic	NONE,KCNT2	Bird_HAR449	HAR_Merge50-00142	15_Quies-ES-deriv-hESC_Derived_CD56+_Mesoderm_Cultured_Cells,15_Quies-Other-Pancreas,15_Quies-Digestive-Rectal_Mucosa.Donor_29,15_Quies-Sm._Muscle-Duodenum_Smooth_Muscle,15_Quies-Other-Spleen,15_Quies-Brain-Brain_Mid_Frontal_Lobe,15_Quies-Sm._Muscle-Rectal_Smooth_Muscle,15_Quies-ENCODE2012-HeLa-S3_Cervical_Carcinoma,15_Quies-HSC_&_B-cell-CD14_Primary_Cells,15_Quies-iPSC-iPS-20b_Cell_Line,15_Quies…
chr1	195825475	195876205	pat_103	Loss	chr1	195873029	195873226	195873029	195873226	197	intergenic	NONE,KCNT2	Bird_HAR449	HAR_Merge50-00142	15_Quies-ES-deriv-hESC_Derived_CD56+_Mesoderm_Cultured_Cells,15_Quies-Other-Pancreas,15_Quies-Digestive-Rectal_Mucosa.Donor_29,15_Quies-Sm._Muscle-Duodenum_Smooth_Muscle,15_Quies-Other-Spleen,15_Quies-Brain-Brain_Mid_Frontal_Lobe,15_Quies-Sm._Muscle-Rectal_Smooth_Muscle,15_Quies-ENCODE2012-HeLa-S3_Cervical_Carcinoma,15_Quies-HSC_&_B-cell-CD14_Primary_Cells,15_Quies-iPSC-iPS-20b_Cell_Line,15_Quies…
chr1	195828553	195876205	pat_056	Loss	chr1	195873029	195873226	195873029	195873226	197	intergenic	NONE,KCNT2	Bird_HAR449	HAR_Merge50-00142	15_Quies-ES-deriv-hESC_Derived_CD56+_Mesoderm_Cultured_Cells,15_Quies-Other-Pancreas,15_Quies-Digestive-Rectal_Mucosa.Donor_29,15_Quies-Sm._Muscle-Duodenum_Smooth_Muscle,15_Quies-Other-Spleen,15_Quies-Brain-Brain_Mid_Frontal_Lobe,15_Quies-Sm._Muscle-Rectal_Smooth_Muscle,15_Quies-ENCODE2012-HeLa-S3_Cervical_Carcinoma,15_Quies-HSC_&_B-cell-CD14_Primary_Cells,15_Quies-iPSC-iPS-20b_Cell_Line,15_Quies…
chr1	195831188	195876205	pat_104	Loss	chr1	195873029	195873226	195873029	195873226	197	intergenic	NONE,KCNT2	Bird_HAR449	HAR_Merge50-00142	15_Quies-ES-deriv-hESC_Derived_CD56+_Mesoderm_Cultured_Cells,15_Quies-Other-Pancreas,15_Quies-Digestive-Rectal_Mucosa.Donor_29,15_Quies-Sm._Muscle-Duodenum_Smooth_Muscle,15_Quies-Other-Spleen,15_Quies-Brain-Brain_Mid_Frontal_Lobe,15_Quies-Sm._Muscle-Rectal_Smooth_Muscle,15_Quies-ENCODE2012-HeLa-S3_Cervical_Carcinoma,15_Quies-HSC_&_B-cell-CD14_Primary_Cells,15_Quies-iPSC-iPS-20b_Cell_Line,15_Quies…
chr1	195831188	195876205	pat_105	Loss	chr1	195873029	195873226	195873029	195873226	197	intergenic	NONE,KCNT2	Bird_HAR449	HAR_Merge50-00142	15_Quies-ES-deriv-hESC_Derived_CD56+_Mesoderm_Cultured_Cells,15_Quies-Other-Pancreas,15_Quies-Digestive-Rectal_Mucosa.Donor_29,15_Quies-Sm._Muscle-Duodenum_Smooth_Muscle,15_Quies-Other-Spleen,15_Quies-Brain-Brain_Mid_Frontal_Lobe,15_Quies-Sm._Muscle-Rectal_Smooth_Muscle,15_Quies-ENCODE2012-HeLa-S3_Cervical_Carcinoma,15_Quies-HSC_&_B-cell-CD14_Primary_Cells,15_Quies-iPSC-iPS-20b_Cell_Line,15_Quies…
chr1	195831188	195876205	pat_106	Loss	chr1	195873029	195873226	195873029	195873226	197	intergenic	NONE,KCNT2	Bird_HAR449	HAR_Merge50-00142	15_Quies-ES-deriv-hESC_Derived_CD56+_Mesoderm_Cultured_Cells,15_Quies-Other-Pancreas,15_Quies-Digestive-Rectal_Mucosa.Donor_29,15_Quies-Sm._Muscle-Duodenum_Smooth_Muscle,15_Quies-Other-Spleen,15_Quies-Brain-Brain_Mid_Frontal_Lobe,15_Quies-Sm._Muscle-Rectal_Smooth_Muscle,15_Quies-ENCODE2012-HeLa-S3_Cervical_Carcinoma,15_Quies-HSC_&_B-cell-CD14_Primary_Cells,15_Quies-iPSC-iPS-20b_Cell_Line,15_Quies…
chr1	195831188	195876205	pat_107	Loss	chr1	195873029	195873226	195873029	195873226	197	intergenic	NONE,KCNT2	Bird_HAR449	HAR_Merge50-00142	15_Quies-ES-deriv-hESC_Derived_CD56+_Mesoderm_Cultured_Cells,15_Quies-Other-Pancreas,15_Quies-Digestive-Rectal_Mucosa.Donor_29,15_Quies-Sm._Muscle-Duodenum_Smooth_Muscle,15_Quies-Other-Spleen,15_Quies-Brain-Brain_Mid_Frontal_Lobe,15_Quies-Sm._Muscle-Rectal_Smooth_Muscle,15_Quies-ENCODE2012-HeLa-S3_Cervical_Carcinoma,15_Quies-HSC_&_B-cell-CD14_Primary_Cells,15_Quies-iPSC-iPS-20b_Cell_Line,15_Quies…
chr1	200274968	200286053	pat_108	Loss	chr1	200284035	200284638	200284035	200284638	603	intergenic	NR5A2,LINC00862	Bird_HAR450	HAR_Merge50-00143	14_ReprPCWk-Neurosph-Neurosphere_Cultured_Cells_Ganglionic_Eminence_Derived,15_Quies-ES-deriv-hESC_Derived_CD56+_Mesoderm_Cultured_Cells,14_ReprPCWk-ENCODE2012-Dnd41_TCell_Leukemia,15_Quies-Other-Pancreas,15_Quies-Digestive-Rectal_Mucosa.Donor_29,15_Quies-Sm._Muscle-Duodenum_Smooth_Muscle,15_Quies-Other-Spleen,5_TxWk-ENCODE2012-NH-A_Astrocytes,15_Quies-Brain-Brain_Mid_Frontal_Lobe,15_Quies-Sm._Mu…	EU250746
chr1	202630537	202711577	pat_109	Gain	chr1	202664608	202664793	202664608	202664793	185	intronic	SYT2	Bird_HAR451	HAR_Merge50-00144	14_ReprPCWk-Muscle-Fetal_Muscle_Trunk,14_ReprPCWk-Digestive-Colonic_Mucosa,14_ReprPCWk-HSC_&_B-cell-CD19_Primary_Cells_Peripheral_UW,15_Quies-Other-Pancreas,14_ReprPCWk-ENCODE2012-Dnd41_TCell_Leukemia,13_ReprPC-HSC_&_B-cell-CD14_Primary_Cells,13_ReprPC-IMR90-IMR90_Cell_Line,15_Quies-Other-Spleen,14_ReprPCWk-Heart-Left_Ventricle,14_ReprPCWk-Digestive-Sigmoid_Colon,14_ReprPCWk-Epithelial-Penis_Fore…	PIK3C2B,MDM4
chr1	204565800	204606302	pat_010	Gain	chr1	204591529	204591699	204591529	204591699	170	intronic	LRRN2	Prabhakar_HAR49	HAR_Merge50-00146	15_Quies-ES-deriv-hESC_Derived_CD56+_Mesoderm_Cultured_Cells,5_TxWk-HSC_&_B-cell-CD19_Primary_Cells_Peripheral_UW,14_ReprPCWk-ENCODE2012-Dnd41_TCell_Leukemia,7_Enh-Digestive-Esophagus,13_ReprPC-IMR90-IMR90_Cell_Line,5_TxWk-Blood_&_T-cell-CD3_Primary_Cells_Cord_BI,15_Quies-Sm._Muscle-Duodenum_Smooth_Muscle,5_TxWk-ENCODE2012-NH-A_Astrocytes,5_TxWk-Brain-Brain_Hippocampus_Middle,14_ReprPCWk-Mesench-…
chr1	208604393	208611009	pat_010	Gain	chr1	208608185	208608637	208608185	208608637	452	intergenic	PLXNA2,MIR205HG	Toh_HAR408,Prabhakar_HAR887	HAR_Merge50-00148	14_ReprPCWk-ENCODE2012-Dnd41_TCell_Leukemia,15_Quies-Other-Pancreas,15_Quies-Sm._Muscle-Duodenum_Smooth_Muscle,14_ReprPCWk-ENCODE2012-A549_EtOH_0.02pct_Lung_Carcinoma,15_Quies-Other-Spleen,15_Quies-Brain-Brain_Mid_Frontal_Lobe,15_Quies-Sm._Muscle-Rectal_Smooth_Muscle,15_Quies-HSC_&_B-cell-CD14_Primary_Cells,15_Quies-iPSC-iPS-20b_Cell_Line,14_ReprPCWk-Heart-Left_Ventricle,15_Quies-HSC_&_B-cell-CD1…
chr1	209732411	209749556	pat_010	Gain	chr1	209734795	209735123	209734795	209735123	328	intergenic	MIR205HG,CAMK1G	Prabhakar_HAR946	HAR_Merge50-00150	14_ReprPCWk-Neurosph-Neurosphere_Cultured_Cells_Ganglionic_Eminence_Derived,15_Quies-ES-deriv-hESC_Derived_CD56+_Mesoderm_Cultured_Cells,14_ReprPCWk-Muscle-Fetal_Muscle_Trunk,14_ReprPCWk-Digestive-Colonic_Mucosa,14_ReprPCWk-HSC_&_B-cell-CD19_Primary_Cells_Peripheral_UW,15_Quies-Other-Pancreas,14_ReprPCWk-ENCODE2012-Dnd41_TCell_Leukemia,13_ReprPC-IMR90-IMR90_Cell_Line,15_Quies-Sm._Muscle-Duodenum_…	C1orf97
chr1	210400670	211372598	pat_009	Gain	chr1	210436018	210436248	210436018	210436248	230	intergenic	SERTAD4,HHAT	Bird_HAR453	HAR_Merge50-00151	7_Enh-Heart-Aorta,14_ReprPCWk-Neurosph-Neurosphere_Cultured_Cells_Ganglionic_Eminence_Derived,14_ReprPCWk-HSC_&_B-cell-CD19_Primary_Cells_Peripheral_UW,14_ReprPCWk-ENCODE2012-Dnd41_TCell_Leukemia,15_Quies-Digestive-Rectal_Mucosa.Donor_29,5_TxWk-ES-deriv-hESC_Derived_CD56+_Ectoderm_Cultured_Cells,7_Enh-Digestive-Esophagus,2_TssAFlnk-Epithelial-Penis_Foreskin_Fibroblast_Primary_Cells_skin01,2_TssAF…
chr1	210416003	210461622	pat_010	Loss	chr1	210436018	210436248	210436018	210436248	230	intergenic	SERTAD4,HHAT	Bird_HAR453	HAR_Merge50-00151	7_Enh-Heart-Aorta,14_ReprPCWk-Neurosph-Neurosphere_Cultured_Cells_Ganglionic_Eminence_Derived,14_ReprPCWk-HSC_&_B-cell-CD19_Primary_Cells_Peripheral_UW,14_ReprPCWk-ENCODE2012-Dnd41_TCell_Leukemia,15_Quies-Digestive-Rectal_Mucosa.Donor_29,5_TxWk-ES-deriv-hESC_Derived_CD56+_Ectoderm_Cultured_Cells,7_Enh-Digestive-Esophagus,2_TssAFlnk-Epithelial-Penis_Foreskin_Fibroblast_Primary_Cells_skin01,2_TssAF…
chr1	212209606	212265552	pat_010	Loss	chr1	212253113	212253453	212253113	212253453	340	intronic	DTL	Bird_HAR454	HAR_Merge50-00152	4_Tx-Muscle-Fetal_Muscle_Leg,15_Quies-Other-Pancreas,4_Tx-iPSC-iPS-20b_Cell_Line,15_Quies-Digestive-Rectal_Mucosa.Donor_29,5_TxWk-ES-deriv-hESC_Derived_CD56+_Ectoderm_Cultured_Cells,5_TxWk-ENCODE2012-HepG2_Hepatocellular_Carcinoma,15_Quies-Sm._Muscle-Duodenum_Smooth_Muscle,15_Quies-Other-Spleen,5_TxWk-ENCODE2012-NH-A_Astrocytes,15_Quies-Brain-Brain_Mid_Frontal_Lobe,5_TxWk-HSC_&_B-cell-CD14_Primar…	BC010168,PPP2R5A
chr1	214154718	214212750	pat_010	Loss	chr1	214202295	214202547	214202295	214202547	252	intronic	PROX1	Bird_HAR456	HAR_Merge50-00155	5_TxWk-Heart-Left_Ventricle,14_ReprPCWk-ENCODE2012-Dnd41_TCell_Leukemia,15_Quies-Digestive-Rectal_Mucosa.Donor_29,15_Quies-Sm._Muscle-Duodenum_Smooth_Muscle,14_ReprPCWk-ENCODE2012-A549_EtOH_0.02pct_Lung_Carcinoma,15_Quies-HSC_&_B-cell-CD14_Primary_Cells,5_TxWk-Other-Spleen,15_Quies-HSC_&_B-cell-CD15_Primary_Cells,14_ReprPCWk-Digestive-Sigmoid_Colon,14_ReprPCWk-ENCODE2012-HMEC_Mammary_Epithelial,7…
chr1	215822333	215846831	pat_010	Loss	chr1	215846403	215846591	215846403	215846591	188	intronic	USH2A	Prabhakar_HAR425	HAR_Merge50-00156	15_Quies-ES-deriv-hESC_Derived_CD56+_Mesoderm_Cultured_Cells,15_Quies-Other-Pancreas,15_Quies-Digestive-Rectal_Mucosa.Donor_29,15_Quies-Sm._Muscle-Duodenum_Smooth_Muscle,14_ReprPCWk-ENCODE2012-A549_EtOH_0.02pct_Lung_Carcinoma,15_Quies-Other-Spleen,15_Quies-Brain-Brain_Mid_Frontal_Lobe,14_ReprPCWk-Mesench-Bone_Marrow_Derived_Mesenchymal_Stem_Cell_Cultured_Cells,15_Quies-Sm._Muscle-Rectal_Smooth_Mu…
chr1	215839089	215853835	pat_110	Loss	chr1	215846403	215846591	215846403	215846591	188	intronic	USH2A	Prabhakar_HAR425	HAR_Merge50-00156	15_Quies-ES-deriv-hESC_Derived_CD56+_Mesoderm_Cultured_Cells,15_Quies-Other-Pancreas,15_Quies-Digestive-Rectal_Mucosa.Donor_29,15_Quies-Sm._Muscle-Duodenum_Smooth_Muscle,14_ReprPCWk-ENCODE2012-A549_EtOH_0.02pct_Lung_Carcinoma,15_Quies-Other-Spleen,15_Quies-Brain-Brain_Mid_Frontal_Lobe,14_ReprPCWk-Mesench-Bone_Marrow_Derived_Mesenchymal_Stem_Cell_Cultured_Cells,15_Quies-Sm._Muscle-Rectal_Smooth_Mu…
chr1	215839089	215861879	pat_111	Loss	chr1	215846403	215846591	215846403	215846591	188	intronic	USH2A	Prabhakar_HAR425	HAR_Merge50-00156	15_Quies-ES-deriv-hESC_Derived_CD56+_Mesoderm_Cultured_Cells,15_Quies-Other-Pancreas,15_Quies-Digestive-Rectal_Mucosa.Donor_29,15_Quies-Sm._Muscle-Duodenum_Smooth_Muscle,14_ReprPCWk-ENCODE2012-A549_EtOH_0.02pct_Lung_Carcinoma,15_Quies-Other-Spleen,15_Quies-Brain-Brain_Mid_Frontal_Lobe,14_ReprPCWk-Mesench-Bone_Marrow_Derived_Mesenchymal_Stem_Cell_Cultured_Cells,15_Quies-Sm._Muscle-Rectal_Smooth_Mu…
chr1	216355949	216357117	pat_010	Gain	chr1	216356754	216357348	216356754	216357117	363	intronic	USH2A	Prabhakar_HAR798,Bird_HAR155	HAR_Merge50-00157	15_Quies-Other-Pancreas,15_Quies-Digestive-Rectal_Mucosa.Donor_29,2_TssAFlnk-iPSC-iPS-18_Cell_Line,15_Quies-Sm._Muscle-Duodenum_Smooth_Muscle,14_ReprPCWk-ENCODE2012-A549_EtOH_0.02pct_Lung_Carcinoma,15_Quies-Other-Spleen,2_TssAFlnk-ESC-HUES6_Cell_Line,14_ReprPCWk-Mesench-Bone_Marrow_Derived_Mesenchymal_Stem_Cell_Cultured_Cells,15_Quies-Sm._Muscle-Rectal_Smooth_Muscle,15_Quies-ENCODE2012-HeLa-S3_Ce…
chr1	216357174	216361230	pat_010	Loss	chr1	216356754	216357348	216357174	216357348	174	intronic	USH2A	Prabhakar_HAR798,Bird_HAR155	HAR_Merge50-00157	15_Quies-Other-Pancreas,15_Quies-Digestive-Rectal_Mucosa.Donor_29,2_TssAFlnk-iPSC-iPS-18_Cell_Line,15_Quies-Sm._Muscle-Duodenum_Smooth_Muscle,14_ReprPCWk-ENCODE2012-A549_EtOH_0.02pct_Lung_Carcinoma,15_Quies-Other-Spleen,2_TssAFlnk-ESC-HUES6_Cell_Line,14_ReprPCWk-Mesench-Bone_Marrow_Derived_Mesenchymal_Stem_Cell_Cultured_Cells,15_Quies-Sm._Muscle-Rectal_Smooth_Muscle,15_Quies-ENCODE2012-HeLa-S3_Ce…
chr1	216885698	216890589	pat_010	Loss	chr1	216885960	216886546	216885960	216886546	586	intronic	ESRRG	Bird_HAR457	HAR_Merge50-00158	14_ReprPCWk-Neurosph-Neurosphere_Cultured_Cells_Ganglionic_Eminence_Derived,15_Quies-ES-deriv-hESC_Derived_CD56+_Mesoderm_Cultured_Cells,14_ReprPCWk-Muscle-Fetal_Muscle_Trunk,15_Quies-Other-Pancreas,15_Quies-Digestive-Rectal_Mucosa.Donor_29,15_Quies-Sm._Muscle-Duodenum_Smooth_Muscle,14_ReprPCWk-ENCODE2012-A549_EtOH_0.02pct_Lung_Carcinoma,15_Quies-Other-Spleen,15_Quies-Brain-Brain_Mid_Frontal_Lobe…	ESRRG
chr1	217116415	217157748	pat_034	Gain	chr1	217138105	217138347	217138105	217138347	242	intronic	ESRRG	Pollard_HAR177	HAR_Merge50-00159	15_Quies-ES-deriv-hESC_Derived_CD56+_Mesoderm_Cultured_Cells,15_Quies-Digestive-Rectal_Mucosa.Donor_29,15_Quies-Sm._Muscle-Duodenum_Smooth_Muscle,15_Quies-Other-Spleen,15_Quies-Brain-Brain_Mid_Frontal_Lobe,15_Quies-Sm._Muscle-Rectal_Smooth_Muscle,15_Quies-ENCODE2012-HeLa-S3_Cervical_Carcinoma,15_Quies-HSC_&_B-cell-CD14_Primary_Cells,15_Quies-iPSC-iPS-20b_Cell_Line,15_Quies-HSC_&_B-cell-CD15_Prima…
chr1	217138013	217167635	pat_010	Gain	chr1	217138105	217138347	217138105	217138347	242	intronic	ESRRG	Pollard_HAR177	HAR_Merge50-00159	15_Quies-ES-deriv-hESC_Derived_CD56+_Mesoderm_Cultured_Cells,15_Quies-Digestive-Rectal_Mucosa.Donor_29,15_Quies-Sm._Muscle-Duodenum_Smooth_Muscle,15_Quies-Other-Spleen,15_Quies-Brain-Brain_Mid_Frontal_Lobe,15_Quies-Sm._Muscle-Rectal_Smooth_Muscle,15_Quies-ENCODE2012-HeLa-S3_Cervical_Carcinoma,15_Quies-HSC_&_B-cell-CD14_Primary_Cells,15_Quies-iPSC-iPS-20b_Cell_Line,15_Quies-HSC_&_B-cell-CD15_Prima…
chr1	217206595	217267976	pat_010	Loss	chr1	217227958	217228105	217227958	217228105	147	intronic	ESRRG	Bird_HAR458	HAR_Merge50-00160	15_Quies-ES-deriv-hESC_Derived_CD56+_Mesoderm_Cultured_Cells,5_TxWk-Heart-Left_Ventricle,15_Quies-Other-Pancreas,15_Quies-Digestive-Rectal_Mucosa.Donor_29,15_Quies-Sm._Muscle-Duodenum_Smooth_Muscle,15_Quies-Other-Spleen,15_Quies-Brain-Brain_Mid_Frontal_Lobe,15_Quies-Sm._Muscle-Rectal_Smooth_Muscle,15_Quies-ENCODE2012-HeLa-S3_Cervical_Carcinoma,15_Quies-HSC_&_B-cell-CD14_Primary_Cells,15_Quies-iPS…	TGFB2
chr1	217577345	217755543	pat_010	Loss	chr1	217633637	217633841	217633637	217633841	204	intronic	GPATCH2	Bird_HAR459	HAR_Merge50-00161	15_Quies-ES-deriv-hESC_Derived_CD56+_Mesoderm_Cultured_Cells,5_TxWk-Heart-Left_Ventricle,15_Quies-Digestive-Rectal_Mucosa.Donor_29,5_TxWk-Blood_&_T-cell-CD3_Primary_Cells_Cord_BI,15_Quies-Other-Spleen,5_TxWk-ENCODE2012-NH-A_Astrocytes,15_Quies-Brain-Brain_Mid_Frontal_Lobe,15_Quies-Sm._Muscle-Rectal_Smooth_Muscle,15_Quies-ENCODE2012-HeLa-S3_Cervical_Carcinoma,15_Quies-HSC_&_B-cell-CD14_Primary_Cel…
chr1	217937457	217988984	pat_010	Loss	chr1	217944112	217944690	217944112	217944690	578	intronic	SPATA17	Prabhakar_HAR194,Pollard_HAR71	HAR_Merge50-00162	15_Quies-ES-deriv-hESC_Derived_CD56+_Mesoderm_Cultured_Cells,15_Quies-Other-Pancreas,15_Quies-Digestive-Rectal_Mucosa.Donor_29,15_Quies-Sm._Muscle-Duodenum_Smooth_Muscle,15_Quies-Other-Spleen,15_Quies-Brain-Brain_Mid_Frontal_Lobe,15_Quies-Sm._Muscle-Rectal_Smooth_Muscle,15_Quies-ENCODE2012-HeLa-S3_Cervical_Carcinoma,15_Quies-HSC_&_B-cell-CD14_Primary_Cells,15_Quies-iPSC-iPS-20b_Cell_Line,15_Quies…
chr1	218279920	218416654	pat_010	Loss	chr1	218392866	218393180	218392866	218393180	314	intergenic	LINC00210,RRP15	Bird_HAR461	HAR_Merge50-00165	14_ReprPCWk-Neurosph-Neurosphere_Cultured_Cells_Ganglionic_Eminence_Derived,15_Quies-ES-deriv-hESC_Derived_CD56+_Mesoderm_Cultured_Cells,15_Quies-Other-Pancreas,15_Quies-Digestive-Rectal_Mucosa.Donor_29,15_Quies-Sm._Muscle-Duodenum_Smooth_Muscle,14_ReprPCWk-ENCODE2012-A549_EtOH_0.02pct_Lung_Carcinoma,15_Quies-Other-Spleen,15_Quies-Brain-Brain_Mid_Frontal_Lobe,15_Quies-Sm._Muscle-Rectal_Smooth_Mus…	LYPLAL1,NONE
chr1	218417519	218473104	pat_010	Gain	chr1	218428301	218428846	218428301	218428846	545	intergenic	LINC00210,RRP15	Pollard_HAR158,Bird_HAR462	HAR_Merge50-00166	15_Quies-ES-deriv-hESC_Derived_CD56+_Mesoderm_Cultured_Cells,15_Quies-Other-Pancreas,15_Quies-Sm._Muscle-Duodenum_Smooth_Muscle,14_ReprPCWk-ENCODE2012-A549_EtOH_0.02pct_Lung_Carcinoma,15_Quies-Other-Spleen,15_Quies-Brain-Brain_Mid_Frontal_Lobe,14_ReprPCWk-Mesench-Bone_Marrow_Derived_Mesenchymal_Stem_Cell_Cultured_Cells,15_Quies-Sm._Muscle-Rectal_Smooth_Muscle,15_Quies-HSC_&_B-cell-CD14_Primary_Ce…
chr1	224842413	225003240	pat_013	Gain	chr1	224898815	224898858	224898815	224898858	43	intronic	CNIH3	Toh_HAR7	HAR_Merge50-00167	14_ReprPCWk-Muscle-Fetal_Muscle_Trunk,15_Quies-Digestive-Rectal_Mucosa.Donor_29,5_TxWk-Epithelial-Penis_Foreskin_Fibroblast_Primary_Cells_skin02,15_Quies-Sm._Muscle-Duodenum_Smooth_Muscle,15_Quies-Other-Spleen,14_ReprPCWk-ENCODE2012-A549_EtOH_0.02pct_Lung_Carcinoma,5_TxWk-ENCODE2012-NH-A_Astrocytes,15_Quies-Brain-Brain_Mid_Frontal_Lobe,15_Quies-Sm._Muscle-Rectal_Smooth_Muscle,15_Quies-HSC_&_B-cel…
chr1	224843929	225035492	pat_009	Gain	chr1	224898815	224898858	224898815	224898858	43	intronic	CNIH3	Toh_HAR7	HAR_Merge50-00167	14_ReprPCWk-Muscle-Fetal_Muscle_Trunk,15_Quies-Digestive-Rectal_Mucosa.Donor_29,5_TxWk-Epithelial-Penis_Foreskin_Fibroblast_Primary_Cells_skin02,15_Quies-Sm._Muscle-Duodenum_Smooth_Muscle,15_Quies-Other-Spleen,14_ReprPCWk-ENCODE2012-A549_EtOH_0.02pct_Lung_Carcinoma,5_TxWk-ENCODE2012-NH-A_Astrocytes,15_Quies-Brain-Brain_Mid_Frontal_Lobe,15_Quies-Sm._Muscle-Rectal_Smooth_Muscle,15_Quies-HSC_&_B-cel…
chr1	224866695	224910305	pat_010	Gain	chr1	224898815	224898858	224898815	224898858	43	intronic	CNIH3	Toh_HAR7	HAR_Merge50-00167	14_ReprPCWk-Muscle-Fetal_Muscle_Trunk,15_Quies-Digestive-Rectal_Mucosa.Donor_29,5_TxWk-Epithelial-Penis_Foreskin_Fibroblast_Primary_Cells_skin02,15_Quies-Sm._Muscle-Duodenum_Smooth_Muscle,15_Quies-Other-Spleen,14_ReprPCWk-ENCODE2012-A549_EtOH_0.02pct_Lung_Carcinoma,5_TxWk-ENCODE2012-NH-A_Astrocytes,15_Quies-Brain-Brain_Mid_Frontal_Lobe,15_Quies-Sm._Muscle-Rectal_Smooth_Muscle,15_Quies-HSC_&_B-cel…
chr1	228173664	249224684	pat_112	Gain	chr1	228288030	228288336	228288030	228288336	306	downstream	C1orf35	Bird_HAR75	HAR_Merge50-00168	4_Tx-Muscle-Fetal_Muscle_Leg,5_TxWk-Heart-Left_Ventricle,6_EnhG-Digestive-Duodenum_Mucosa,4_Tx-iPSC-iPS-20b_Cell_Line,4_Tx-Other-Placenta_Amnion,5_TxWk-ES-deriv-hESC_Derived_CD56+_Ectoderm_Cultured_Cells,6_EnhG-Digestive-Gastric,5_TxWk-ENCODE2012-NH-A_Astrocytes,4_Tx-ENCODE2012-Osteoblasts,4_Tx-Blood_&_T-cell-Peripheral_Blood_Mononuclear_Primary_Cells,4_Tx-Other-Fetal_Adrenal_Gland,4_Tx-Digestive…	WNT3A,GUK1,IBA57,TAF5L,URB2
chr1	228173664	249224684	pat_112	Gain	chr1	228636832	228637153	228636832	228637153	321	intergenic	HIST3H3,HIST3H2A	Bird_HAR156	HAR_Merge50-00169	14_ReprPCWk-Muscle-Fetal_Muscle_Trunk,14_ReprPCWk-Digestive-Colonic_Mucosa,14_ReprPCWk-HSC_&_B-cell-CD19_Primary_Cells_Peripheral_UW,15_Quies-Other-Pancreas,14_ReprPCWk-ENCODE2012-Dnd41_TCell_Leukemia,14_ReprPCWk-Mesench-Bone_Marrow_Derived_Mesenchymal_Stem_Cell_Cultured_Cells,15_Quies-ENCODE2012-HeLa-S3_Cervical_Carcinoma,14_ReprPCWk-HSC_&_B-cell-CD14_Primary_Cells,14_ReprPCWk-Digestive-Sigmoid_…	VPS33A,HIST3H2A
chr1	228173664	249224684	pat_112	Gain	chr1	231674967	231675300	231674967	231675300	333	ncRNA_intronic	TSNAX-DISC1	Bird_HAR463	HAR_Merge50-00170	4_Tx-Muscle-Fetal_Muscle_Leg,5_TxWk-Digestive-Colonic_Mucosa,8_ZNF/Rpts-ES-deriv-hESC_Derived_CD184+_Endoderm_Cultured_Cells,4_Tx-Blood_&_T-cell-CD4_Naive_Primary_Cells,5_TxWk-Heart-Left_Ventricle,4_Tx-iPSC-iPS-20b_Cell_Line,5_TxWk-ES-deriv-hESC_Derived_CD56+_Ectoderm_Cultured_Cells,5_TxWk-Epithelial-Penis_Foreskin_Fibroblast_Primary_Cells_skin02,5_TxWk-ENCODE2012-HepG2_Hepatocellular_Carcinoma,5…	EXOC8,SPRTNTSNAX
chr1	228173664	249224684	pat_112	Gain	chr1	234162231	234162343	234162231	234162343	112	intronic	SLC35F3	Bird_HAR157	HAR_Merge50-00171	15_Quies-ES-deriv-hESC_Derived_CD56+_Mesoderm_Cultured_Cells,14_ReprPCWk-ENCODE2012-Dnd41_TCell_Leukemia,15_Quies-Other-Pancreas,15_Quies-Digestive-Rectal_Mucosa.Donor_29,15_Quies-Sm._Muscle-Duodenum_Smooth_Muscle,15_Quies-Other-Spleen,15_Quies-Brain-Brain_Mid_Frontal_Lobe,15_Quies-Sm._Muscle-Rectal_Smooth_Muscle,15_Quies-ENCODE2012-HeLa-S3_Cervical_Carcinoma,15_Quies-HSC_&_B-cell-CD14_Primary_Ce…
chr1	228173664	249224684	pat_112	Gain	chr1	237207751	237207919	237207751	237207919	168	intronic	RYR2	Prabhakar_HAR383	HAR_Merge50-00172	7_Enh-Heart-Aorta,14_ReprPCWk-Digestive-Colonic_Mucosa,14_ReprPCWk-Muscle-Fetal_Muscle_Trunk,14_ReprPCWk-HSC_&_B-cell-CD19_Primary_Cells_Peripheral_UW,15_Quies-Other-Pancreas,13_ReprPC-Digestive-Rectal_Mucosa.Donor_29,13_ReprPC-HSC_&_B-cell-CD14_Primary_Cells,1_TssA-Heart-Fetal_Heart,13_ReprPC-HSC_&_B-cell-CD56_Primary_Cells,13_ReprPC-ENCODE2012-NHLF_Lung_Fibroblasts,14_ReprPCWk-Digestive-Sigmoid…
chr1	228173664	249224684	pat_112	Gain	chr1	243216422	243216810	243216422	243216810	388	intergenic	PLD5,LOC731275	Bird_HAR464	HAR_Merge50-00173	15_Quies-ES-deriv-hESC_Derived_CD56+_Mesoderm_Cultured_Cells,15_Quies-Other-Pancreas,15_Quies-Digestive-Rectal_Mucosa.Donor_29,15_Quies-Sm._Muscle-Duodenum_Smooth_Muscle,15_Quies-Other-Spleen,15_Quies-Brain-Brain_Mid_Frontal_Lobe,15_Quies-Sm._Muscle-Rectal_Smooth_Muscle,15_Quies-ENCODE2012-HeLa-S3_Cervical_Carcinoma,15_Quies-HSC_&_B-cell-CD14_Primary_Cells,15_Quies-iPSC-iPS-20b_Cell_Line,15_Quies…	NCRNA00201
chr1	228173664	249224684	pat_112	Gain	chr1	243364665	243364776	243364665	243364776	111	intronic	CEP170	Bird_HAR465	HAR_Merge50-00174	5_TxWk-HSC_&_B-cell-CD19_Primary_Cells_Peripheral_UW,5_TxWk-Heart-Left_Ventricle,5_TxWk-Blood_&_T-cell-CD4+_CD25-_CD45RA+_Naive_Primary_Cells,15_Quies-Other-Pancreas,15_Quies-Digestive-Rectal_Mucosa.Donor_29,5_TxWk-ES-deriv-hESC_Derived_CD56+_Ectoderm_Cultured_Cells,5_TxWk-Epithelial-Penis_Foreskin_Fibroblast_Primary_Cells_skin02,5_TxWk-ENCODE2012-HepG2_Hepatocellular_Carcinoma,5_TxWk-Blood_&_T-c…
chr1	228173664	249224684	pat_112	Gain	chr1	243502411	243502466	243502411	243502466	55	intronic	SDCCAG8	Toh_HAR43	HAR_Merge50-00175	5_TxWk-HSC_&_B-cell-CD19_Primary_Cells_Peripheral_UW,5_TxWk-Digestive-Colonic_Mucosa,5_TxWk-Heart-Left_Ventricle,5_TxWk-Blood_&_T-cell-CD4+_CD25-_CD45RA+_Naive_Primary_Cells,5_TxWk-Epithelial-Penis_Foreskin_Fibroblast_Primary_Cells_skin02,5_TxWk-Blood_&_T-cell-CD3_Primary_Cells_Cord_BI,5_TxWk-ENCODE2012-NH-A_Astrocytes,5_TxWk-Brain-Brain_Hippocampus_Middle,5_TxWk-HSC_&_B-cell-CD14_Primary_Cells,1…
chr1	228173664	249224684	pat_112	Gain	chr1	243639588	243639662	243639588	243639662	74	intronic	SDCCAG8	Toh_HAR274	HAR_Merge50-00176	5_TxWk-HSC_&_B-cell-CD19_Primary_Cells_Peripheral_UW,5_TxWk-Heart-Left_Ventricle,5_TxWk-Blood_&_T-cell-CD4+_CD25-_CD45RA+_Naive_Primary_Cells,5_TxWk-Epithelial-Penis_Foreskin_Fibroblast_Primary_Cells_skin02,6_EnhG-Digestive-Fetal_Stomach,15_Quies-Other-Spleen,5_TxWk-HSC_&_B-cell-CD14_Primary_Cells,15_Quies-Sm._Muscle-Rectal_Smooth_Muscle,15_Quies-ENCODE2012-HeLa-S3_Cervical_Carcinoma,5_TxWk-Epith…
chr1	228173664	249224684	pat_112	Gain	chr1	245320617	245320734	245320617	245320734	117	intronic	KIF26B	Prabhakar_HAR443	HAR_Merge50-00177	12_EnhBiv-ES-deriv-hESC_Derived_CD56+_Ectoderm_Cultured_Cells,15_Quies-Other-Pancreas,13_ReprPC-Digestive-Rectal_Mucosa.Donor_29,13_ReprPC-HSC_&_B-cell-CD14_Primary_Cells,1_TssA-ES-deriv-hESC_Derived_CD56+_Mesoderm_Cultured_Cells,12_EnhBiv-HSC_&_B-cell-CD19_Primary_Cells_Peripheral_UW,7_Enh-Other-Adult_Liver,2_TssAFlnk-Digestive-Fetal_Intestine_Large,15_Quies-Other-Spleen,12_EnhBiv-Brain-Brain_Ci…
chr1	228173664	249224684	pat_112	Gain	chr1	245389034	245389269	245389034	245389269	235	intronic	KIF26B	Prabhakar_HAR287	HAR_Merge50-00178	14_ReprPCWk-Neurosph-Neurosphere_Cultured_Cells_Ganglionic_Eminence_Derived,15_Quies-ES-deriv-hESC_Derived_CD56+_Mesoderm_Cultured_Cells,14_ReprPCWk-Muscle-Fetal_Muscle_Trunk,14_ReprPCWk-Digestive-Colonic_Mucosa,15_Quies-Other-Pancreas,15_Quies-Digestive-Rectal_Mucosa.Donor_29,13_ReprPC-HSC_&_B-cell-CD14_Primary_Cells,15_Quies-Sm._Muscle-Duodenum_Smooth_Muscle,14_ReprPCWk-ENCODE2012-A549_EtOH_0.0…
chr1	228173664	249224684	pat_112	Gain	chr1	247348197	247348325	247348197	247348325	128	intergenic	ZNF124,MIR3916	Bird_HAR466	HAR_Merge50-00179	9_Het-Other-Ovary,8_ZNF/Rpts-ENCODE2012-Monocytes-CD14+_RO01746,9_Het-Blood_&_T-cell-Peripheral_Blood_Mononuclear_Primary_Cells,9_Het-ENCODE2012-NHLF_Lung_Fibroblasts,9_Het-Digestive-Rectal_Mucosa.Donor_29,9_Het-Digestive-Sigmoid_Colon,15_Quies-Brain-Brain_Mid_Frontal_Lobe,15_Quies-iPSC-iPS-20b_Cell_Line,9_Het-ESC-ES-I3_Cell_Line,9_Het-Brain-Brain_Germinal_Matrix,9_Het-Digestive-Colonic_Mucosa,9_…
chr1	234145100	234181761	pat_010	Gain	chr1	234162231	234162343	234162231	234162343	112	intronic	SLC35F3	Bird_HAR157	HAR_Merge50-00171	15_Quies-ES-deriv-hESC_Derived_CD56+_Mesoderm_Cultured_Cells,14_ReprPCWk-ENCODE2012-Dnd41_TCell_Leukemia,15_Quies-Other-Pancreas,15_Quies-Digestive-Rectal_Mucosa.Donor_29,15_Quies-Sm._Muscle-Duodenum_Smooth_Muscle,15_Quies-Other-Spleen,15_Quies-Brain-Brain_Mid_Frontal_Lobe,15_Quies-Sm._Muscle-Rectal_Smooth_Muscle,15_Quies-ENCODE2012-HeLa-S3_Cervical_Carcinoma,15_Quies-HSC_&_B-cell-CD14_Primary_Ce…
chr1	236067501	237413809	pat_009	Gain	chr1	237207751	237207919	237207751	237207919	168	intronic	RYR2	Prabhakar_HAR383	HAR_Merge50-00172	7_Enh-Heart-Aorta,14_ReprPCWk-Digestive-Colonic_Mucosa,14_ReprPCWk-Muscle-Fetal_Muscle_Trunk,14_ReprPCWk-HSC_&_B-cell-CD19_Primary_Cells_Peripheral_UW,15_Quies-Other-Pancreas,13_ReprPC-Digestive-Rectal_Mucosa.Donor_29,13_ReprPC-HSC_&_B-cell-CD14_Primary_Cells,1_TssA-Heart-Fetal_Heart,13_ReprPC-HSC_&_B-cell-CD56_Primary_Cells,13_ReprPC-ENCODE2012-NHLF_Lung_Fibroblasts,14_ReprPCWk-Digestive-Sigmoid…
chr1	243636487	243648474	pat_010	Loss	chr1	243639588	243639662	243639588	243639662	74	intronic	SDCCAG8	Toh_HAR274	HAR_Merge50-00176	5_TxWk-HSC_&_B-cell-CD19_Primary_Cells_Peripheral_UW,5_TxWk-Heart-Left_Ventricle,5_TxWk-Blood_&_T-cell-CD4+_CD25-_CD45RA+_Naive_Primary_Cells,5_TxWk-Epithelial-Penis_Foreskin_Fibroblast_Primary_Cells_skin02,6_EnhG-Digestive-Fetal_Stomach,15_Quies-Other-Spleen,5_TxWk-HSC_&_B-cell-CD14_Primary_Cells,15_Quies-Sm._Muscle-Rectal_Smooth_Muscle,15_Quies-ENCODE2012-HeLa-S3_Cervical_Carcinoma,5_TxWk-Epith…
chr1	245317778	245394871	pat_010	Loss	chr1	245320617	245320734	245320617	245320734	117	intronic	KIF26B	Prabhakar_HAR443	HAR_Merge50-00177	12_EnhBiv-ES-deriv-hESC_Derived_CD56+_Ectoderm_Cultured_Cells,15_Quies-Other-Pancreas,13_ReprPC-Digestive-Rectal_Mucosa.Donor_29,13_ReprPC-HSC_&_B-cell-CD14_Primary_Cells,1_TssA-ES-deriv-hESC_Derived_CD56+_Mesoderm_Cultured_Cells,12_EnhBiv-HSC_&_B-cell-CD19_Primary_Cells_Peripheral_UW,7_Enh-Other-Adult_Liver,2_TssAFlnk-Digestive-Fetal_Intestine_Large,15_Quies-Other-Spleen,12_EnhBiv-Brain-Brain_Ci…
chr1	245317778	245394871	pat_010	Loss	chr1	245389034	245389269	245389034	245389269	235	intronic	KIF26B	Prabhakar_HAR287	HAR_Merge50-00178	14_ReprPCWk-Neurosph-Neurosphere_Cultured_Cells_Ganglionic_Eminence_Derived,15_Quies-ES-deriv-hESC_Derived_CD56+_Mesoderm_Cultured_Cells,14_ReprPCWk-Muscle-Fetal_Muscle_Trunk,14_ReprPCWk-Digestive-Colonic_Mucosa,15_Quies-Other-Pancreas,15_Quies-Digestive-Rectal_Mucosa.Donor_29,13_ReprPC-HSC_&_B-cell-CD14_Primary_Cells,15_Quies-Sm._Muscle-Duodenum_Smooth_Muscle,14_ReprPCWk-ENCODE2012-A549_EtOH_0.0…
chr1	245322791	245899100	pat_113	Gain	chr1	245389034	245389269	245389034	245389269	235	intronic	KIF26B	Prabhakar_HAR287	HAR_Merge50-00178	14_ReprPCWk-Neurosph-Neurosphere_Cultured_Cells_Ganglionic_Eminence_Derived,15_Quies-ES-deriv-hESC_Derived_CD56+_Mesoderm_Cultured_Cells,14_ReprPCWk-Muscle-Fetal_Muscle_Trunk,14_ReprPCWk-Digestive-Colonic_Mucosa,15_Quies-Other-Pancreas,15_Quies-Digestive-Rectal_Mucosa.Donor_29,13_ReprPC-HSC_&_B-cell-CD14_Primary_Cells,15_Quies-Sm._Muscle-Duodenum_Smooth_Muscle,14_ReprPCWk-ENCODE2012-A549_EtOH_0.0…
chr1	245374588	246510779	pat_009	Gain	chr1	245389034	245389269	245389034	245389269	235	intronic	KIF26B	Prabhakar_HAR287	HAR_Merge50-00178	14_ReprPCWk-Neurosph-Neurosphere_Cultured_Cells_Ganglionic_Eminence_Derived,15_Quies-ES-deriv-hESC_Derived_CD56+_Mesoderm_Cultured_Cells,14_ReprPCWk-Muscle-Fetal_Muscle_Trunk,14_ReprPCWk-Digestive-Colonic_Mucosa,15_Quies-Other-Pancreas,15_Quies-Digestive-Rectal_Mucosa.Donor_29,13_ReprPC-HSC_&_B-cell-CD14_Primary_Cells,15_Quies-Sm._Muscle-Duodenum_Smooth_Muscle,14_ReprPCWk-ENCODE2012-A549_EtOH_0.0…
chr1	247312369	247544767	pat_114	Gain	chr1	247348197	247348325	247348197	247348325	128	intergenic	ZNF124,MIR3916	Bird_HAR466	HAR_Merge50-00179	9_Het-Other-Ovary,8_ZNF/Rpts-ENCODE2012-Monocytes-CD14+_RO01746,9_Het-Blood_&_T-cell-Peripheral_Blood_Mononuclear_Primary_Cells,9_Het-ENCODE2012-NHLF_Lung_Fibroblasts,9_Het-Digestive-Rectal_Mucosa.Donor_29,9_Het-Digestive-Sigmoid_Colon,15_Quies-Brain-Brain_Mid_Frontal_Lobe,15_Quies-iPSC-iPS-20b_Cell_Line,9_Het-ESC-ES-I3_Cell_Line,9_Het-Brain-Brain_Germinal_Matrix,9_Het-Digestive-Colonic_Mucosa,9_…
chr10	100026	6213384	pat_115	Loss	chr10	234977	235121	234977	235121	144	intronic	ZMYND11	Bird_HAR38	HAR_Merge50-00180	5_TxWk-HSC_&_B-cell-CD19_Primary_Cells_Peripheral_UW,5_TxWk-Heart-Left_Ventricle,5_TxWk-Blood_&_T-cell-CD4+_CD25-_CD45RA+_Naive_Primary_Cells,5_TxWk-ES-deriv-hESC_Derived_CD56+_Ectoderm_Cultured_Cells,5_TxWk-Epithelial-Penis_Foreskin_Fibroblast_Primary_Cells_skin02,5_TxWk-ENCODE2012-HepG2_Hepatocellular_Carcinoma,5_TxWk-Blood_&_T-cell-CD3_Primary_Cells_Cord_BI,5_TxWk-Brain-Brain_Hippocampus_Middl…	ZMYND11
chr10	100026	6213384	pat_115	Loss	chr10	1709764	1709899	1709764	1709899	135	intronic	ADARB2	Bird_HAR513	HAR_Merge50-00181	9_Het-Epithelial-Penis_Foreskin_Fibroblast_Primary_Cells_skin02,15_Quies-ES-deriv-hESC_Derived_CD56+_Mesoderm_Cultured_Cells,14_ReprPCWk-Muscle-Fetal_Muscle_Trunk,15_Quies-Other-Pancreas,14_ReprPCWk-ENCODE2012-Dnd41_TCell_Leukemia,15_Quies-Digestive-Rectal_Mucosa.Donor_29,14_ReprPCWk-ENCODE2012-A549_EtOH_0.02pct_Lung_Carcinoma,15_Quies-Brain-Brain_Mid_Frontal_Lobe,15_Quies-Sm._Muscle-Rectal_Smoot…
chr10	100026	6213384	pat_115	Loss	chr10	2117487	2117687	2117487	2117687	200	intergenic	LINC00700,LINC00701	Bird_HAR515	HAR_Merge50-00182	9_Het-Epithelial-Penis_Foreskin_Fibroblast_Primary_Cells_skin02,15_Quies-ES-deriv-hESC_Derived_CD56+_Mesoderm_Cultured_Cells,15_Quies-Other-Pancreas,9_Het-ENCODE2012-NHLF_Lung_Fibroblasts,9_Het-Digestive-Rectal_Mucosa.Donor_29,14_ReprPCWk-ENCODE2012-A549_EtOH_0.02pct_Lung_Carcinoma,15_Quies-Other-Spleen,15_Quies-Brain-Brain_Mid_Frontal_Lobe,15_Quies-Sm._Muscle-Rectal_Smooth_Muscle,15_Quies-ENCODE…
chr10	100027	1209921	pat_009	Loss	chr10	234977	235121	234977	235121	144	intronic	ZMYND11	Bird_HAR38	HAR_Merge50-00180	5_TxWk-HSC_&_B-cell-CD19_Primary_Cells_Peripheral_UW,5_TxWk-Heart-Left_Ventricle,5_TxWk-Blood_&_T-cell-CD4+_CD25-_CD45RA+_Naive_Primary_Cells,5_TxWk-ES-deriv-hESC_Derived_CD56+_Ectoderm_Cultured_Cells,5_TxWk-Epithelial-Penis_Foreskin_Fibroblast_Primary_Cells_skin02,5_TxWk-ENCODE2012-HepG2_Hepatocellular_Carcinoma,5_TxWk-Blood_&_T-cell-CD3_Primary_Cells_Cord_BI,5_TxWk-Brain-Brain_Hippocampus_Middl…	ZMYND11
chr10	100027	474029	pat_009	Loss	chr10	234977	235121	234977	235121	144	intronic	ZMYND11	Bird_HAR38	HAR_Merge50-00180	5_TxWk-HSC_&_B-cell-CD19_Primary_Cells_Peripheral_UW,5_TxWk-Heart-Left_Ventricle,5_TxWk-Blood_&_T-cell-CD4+_CD25-_CD45RA+_Naive_Primary_Cells,5_TxWk-ES-deriv-hESC_Derived_CD56+_Ectoderm_Cultured_Cells,5_TxWk-Epithelial-Penis_Foreskin_Fibroblast_Primary_Cells_skin02,5_TxWk-ENCODE2012-HepG2_Hepatocellular_Carcinoma,5_TxWk-Blood_&_T-cell-CD3_Primary_Cells_Cord_BI,5_TxWk-Brain-Brain_Hippocampus_Middl…	ZMYND11
chr10	130294	913825	pat_116	Gain	chr10	234977	235121	234977	235121	144	intronic	ZMYND11	Bird_HAR38	HAR_Merge50-00180	5_TxWk-HSC_&_B-cell-CD19_Primary_Cells_Peripheral_UW,5_TxWk-Heart-Left_Ventricle,5_TxWk-Blood_&_T-cell-CD4+_CD25-_CD45RA+_Naive_Primary_Cells,5_TxWk-ES-deriv-hESC_Derived_CD56+_Ectoderm_Cultured_Cells,5_TxWk-Epithelial-Penis_Foreskin_Fibroblast_Primary_Cells_skin02,5_TxWk-ENCODE2012-HepG2_Hepatocellular_Carcinoma,5_TxWk-Blood_&_T-cell-CD3_Primary_Cells_Cord_BI,5_TxWk-Brain-Brain_Hippocampus_Middl…	ZMYND11
chr10	135655	627233	pat_117	Gain	chr10	234977	235121	234977	235121	144	intronic	ZMYND11	Bird_HAR38	HAR_Merge50-00180	5_TxWk-HSC_&_B-cell-CD19_Primary_Cells_Peripheral_UW,5_TxWk-Heart-Left_Ventricle,5_TxWk-Blood_&_T-cell-CD4+_CD25-_CD45RA+_Naive_Primary_Cells,5_TxWk-ES-deriv-hESC_Derived_CD56+_Ectoderm_Cultured_Cells,5_TxWk-Epithelial-Penis_Foreskin_Fibroblast_Primary_Cells_skin02,5_TxWk-ENCODE2012-HepG2_Hepatocellular_Carcinoma,5_TxWk-Blood_&_T-cell-CD3_Primary_Cells_Cord_BI,5_TxWk-Brain-Brain_Hippocampus_Middl…	ZMYND11
chr10	135655	872310	pat_118	Gain	chr10	234977	235121	234977	235121	144	intronic	ZMYND11	Bird_HAR38	HAR_Merge50-00180	5_TxWk-HSC_&_B-cell-CD19_Primary_Cells_Peripheral_UW,5_TxWk-Heart-Left_Ventricle,5_TxWk-Blood_&_T-cell-CD4+_CD25-_CD45RA+_Naive_Primary_Cells,5_TxWk-ES-deriv-hESC_Derived_CD56+_Ectoderm_Cultured_Cells,5_TxWk-Epithelial-Penis_Foreskin_Fibroblast_Primary_Cells_skin02,5_TxWk-ENCODE2012-HepG2_Hepatocellular_Carcinoma,5_TxWk-Blood_&_T-cell-CD3_Primary_Cells_Cord_BI,5_TxWk-Brain-Brain_Hippocampus_Middl…	ZMYND11
chr10	135866	716922	pat_119	Gain	chr10	234977	235121	234977	235121	144	intronic	ZMYND11	Bird_HAR38	HAR_Merge50-00180	5_TxWk-HSC_&_B-cell-CD19_Primary_Cells_Peripheral_UW,5_TxWk-Heart-Left_Ventricle,5_TxWk-Blood_&_T-cell-CD4+_CD25-_CD45RA+_Naive_Primary_Cells,5_TxWk-ES-deriv-hESC_Derived_CD56+_Ectoderm_Cultured_Cells,5_TxWk-Epithelial-Penis_Foreskin_Fibroblast_Primary_Cells_skin02,5_TxWk-ENCODE2012-HepG2_Hepatocellular_Carcinoma,5_TxWk-Blood_&_T-cell-CD3_Primary_Cells_Cord_BI,5_TxWk-Brain-Brain_Hippocampus_Middl…	ZMYND11
chr10	144089	354683	pat_120	Gain	chr10	234977	235121	234977	235121	144	intronic	ZMYND11	Bird_HAR38	HAR_Merge50-00180	5_TxWk-HSC_&_B-cell-CD19_Primary_Cells_Peripheral_UW,5_TxWk-Heart-Left_Ventricle,5_TxWk-Blood_&_T-cell-CD4+_CD25-_CD45RA+_Naive_Primary_Cells,5_TxWk-ES-deriv-hESC_Derived_CD56+_Ectoderm_Cultured_Cells,5_TxWk-Epithelial-Penis_Foreskin_Fibroblast_Primary_Cells_skin02,5_TxWk-ENCODE2012-HepG2_Hepatocellular_Carcinoma,5_TxWk-Blood_&_T-cell-CD3_Primary_Cells_Cord_BI,5_TxWk-Brain-Brain_Hippocampus_Middl…	ZMYND11
chr10	144089	415401	pat_121	Gain	chr10	234977	235121	234977	235121	144	intronic	ZMYND11	Bird_HAR38	HAR_Merge50-00180	5_TxWk-HSC_&_B-cell-CD19_Primary_Cells_Peripheral_UW,5_TxWk-Heart-Left_Ventricle,5_TxWk-Blood_&_T-cell-CD4+_CD25-_CD45RA+_Naive_Primary_Cells,5_TxWk-ES-deriv-hESC_Derived_CD56+_Ectoderm_Cultured_Cells,5_TxWk-Epithelial-Penis_Foreskin_Fibroblast_Primary_Cells_skin02,5_TxWk-ENCODE2012-HepG2_Hepatocellular_Carcinoma,5_TxWk-Blood_&_T-cell-CD3_Primary_Cells_Cord_BI,5_TxWk-Brain-Brain_Hippocampus_Middl…	ZMYND11
chr10	144089	907203	pat_122	Gain	chr10	234977	235121	234977	235121	144	intronic	ZMYND11	Bird_HAR38	HAR_Merge50-00180	5_TxWk-HSC_&_B-cell-CD19_Primary_Cells_Peripheral_UW,5_TxWk-Heart-Left_Ventricle,5_TxWk-Blood_&_T-cell-CD4+_CD25-_CD45RA+_Naive_Primary_Cells,5_TxWk-ES-deriv-hESC_Derived_CD56+_Ectoderm_Cultured_Cells,5_TxWk-Epithelial-Penis_Foreskin_Fibroblast_Primary_Cells_skin02,5_TxWk-ENCODE2012-HepG2_Hepatocellular_Carcinoma,5_TxWk-Blood_&_T-cell-CD3_Primary_Cells_Cord_BI,5_TxWk-Brain-Brain_Hippocampus_Middl…	ZMYND11
chr10	144089	912091	pat_123	Gain	chr10	234977	235121	234977	235121	144	intronic	ZMYND11	Bird_HAR38	HAR_Merge50-00180	5_TxWk-HSC_&_B-cell-CD19_Primary_Cells_Peripheral_UW,5_TxWk-Heart-Left_Ventricle,5_TxWk-Blood_&_T-cell-CD4+_CD25-_CD45RA+_Naive_Primary_Cells,5_TxWk-ES-deriv-hESC_Derived_CD56+_Ectoderm_Cultured_Cells,5_TxWk-Epithelial-Penis_Foreskin_Fibroblast_Primary_Cells_skin02,5_TxWk-ENCODE2012-HepG2_Hepatocellular_Carcinoma,5_TxWk-Blood_&_T-cell-CD3_Primary_Cells_Cord_BI,5_TxWk-Brain-Brain_Hippocampus_Middl…	ZMYND11
chr10	160760	623183	pat_124	Gain	chr10	234977	235121	234977	235121	144	intronic	ZMYND11	Bird_HAR38	HAR_Merge50-00180	5_TxWk-HSC_&_B-cell-CD19_Primary_Cells_Peripheral_UW,5_TxWk-Heart-Left_Ventricle,5_TxWk-Blood_&_T-cell-CD4+_CD25-_CD45RA+_Naive_Primary_Cells,5_TxWk-ES-deriv-hESC_Derived_CD56+_Ectoderm_Cultured_Cells,5_TxWk-Epithelial-Penis_Foreskin_Fibroblast_Primary_Cells_skin02,5_TxWk-ENCODE2012-HepG2_Hepatocellular_Carcinoma,5_TxWk-Blood_&_T-cell-CD3_Primary_Cells_Cord_BI,5_TxWk-Brain-Brain_Hippocampus_Middl…	ZMYND11
chr10	173330	355874	pat_125	Gain	chr10	234977	235121	234977	235121	144	intronic	ZMYND11	Bird_HAR38	HAR_Merge50-00180	5_TxWk-HSC_&_B-cell-CD19_Primary_Cells_Peripheral_UW,5_TxWk-Heart-Left_Ventricle,5_TxWk-Blood_&_T-cell-CD4+_CD25-_CD45RA+_Naive_Primary_Cells,5_TxWk-ES-deriv-hESC_Derived_CD56+_Ectoderm_Cultured_Cells,5_TxWk-Epithelial-Penis_Foreskin_Fibroblast_Primary_Cells_skin02,5_TxWk-ENCODE2012-HepG2_Hepatocellular_Carcinoma,5_TxWk-Blood_&_T-cell-CD3_Primary_Cells_Cord_BI,5_TxWk-Brain-Brain_Hippocampus_Middl…	ZMYND11
chr10	173330	778318	pat_126	Gain	chr10	234977	235121	234977	235121	144	intronic	ZMYND11	Bird_HAR38	HAR_Merge50-00180	5_TxWk-HSC_&_B-cell-CD19_Primary_Cells_Peripheral_UW,5_TxWk-Heart-Left_Ventricle,5_TxWk-Blood_&_T-cell-CD4+_CD25-_CD45RA+_Naive_Primary_Cells,5_TxWk-ES-deriv-hESC_Derived_CD56+_Ectoderm_Cultured_Cells,5_TxWk-Epithelial-Penis_Foreskin_Fibroblast_Primary_Cells_skin02,5_TxWk-ENCODE2012-HepG2_Hepatocellular_Carcinoma,5_TxWk-Blood_&_T-cell-CD3_Primary_Cells_Cord_BI,5_TxWk-Brain-Brain_Hippocampus_Middl…	ZMYND11
chr10	176711	354301	pat_127	Gain	chr10	234977	235121	234977	235121	144	intronic	ZMYND11	Bird_HAR38	HAR_Merge50-00180	5_TxWk-HSC_&_B-cell-CD19_Primary_Cells_Peripheral_UW,5_TxWk-Heart-Left_Ventricle,5_TxWk-Blood_&_T-cell-CD4+_CD25-_CD45RA+_Naive_Primary_Cells,5_TxWk-ES-deriv-hESC_Derived_CD56+_Ectoderm_Cultured_Cells,5_TxWk-Epithelial-Penis_Foreskin_Fibroblast_Primary_Cells_skin02,5_TxWk-ENCODE2012-HepG2_Hepatocellular_Carcinoma,5_TxWk-Blood_&_T-cell-CD3_Primary_Cells_Cord_BI,5_TxWk-Brain-Brain_Hippocampus_Middl…	ZMYND11
chr10	184171	235094	pat_010	Gain	chr10	234977	235121	234977	235094	117	intronic	ZMYND11	Bird_HAR38	HAR_Merge50-00180	5_TxWk-HSC_&_B-cell-CD19_Primary_Cells_Peripheral_UW,5_TxWk-Heart-Left_Ventricle,5_TxWk-Blood_&_T-cell-CD4+_CD25-_CD45RA+_Naive_Primary_Cells,5_TxWk-ES-deriv-hESC_Derived_CD56+_Ectoderm_Cultured_Cells,5_TxWk-Epithelial-Penis_Foreskin_Fibroblast_Primary_Cells_skin02,5_TxWk-ENCODE2012-HepG2_Hepatocellular_Carcinoma,5_TxWk-Blood_&_T-cell-CD3_Primary_Cells_Cord_BI,5_TxWk-Brain-Brain_Hippocampus_Middl…	ZMYND11
chr10	184171	352898	pat_128	Gain	chr10	234977	235121	234977	235121	144	intronic	ZMYND11	Bird_HAR38	HAR_Merge50-00180	5_TxWk-HSC_&_B-cell-CD19_Primary_Cells_Peripheral_UW,5_TxWk-Heart-Left_Ventricle,5_TxWk-Blood_&_T-cell-CD4+_CD25-_CD45RA+_Naive_Primary_Cells,5_TxWk-ES-deriv-hESC_Derived_CD56+_Ectoderm_Cultured_Cells,5_TxWk-Epithelial-Penis_Foreskin_Fibroblast_Primary_Cells_skin02,5_TxWk-ENCODE2012-HepG2_Hepatocellular_Carcinoma,5_TxWk-Blood_&_T-cell-CD3_Primary_Cells_Cord_BI,5_TxWk-Brain-Brain_Hippocampus_Middl…	ZMYND11
chr10	190371	415227	pat_129	Gain	chr10	234977	235121	234977	235121	144	intronic	ZMYND11	Bird_HAR38	HAR_Merge50-00180	5_TxWk-HSC_&_B-cell-CD19_Primary_Cells_Peripheral_UW,5_TxWk-Heart-Left_Ventricle,5_TxWk-Blood_&_T-cell-CD4+_CD25-_CD45RA+_Naive_Primary_Cells,5_TxWk-ES-deriv-hESC_Derived_CD56+_Ectoderm_Cultured_Cells,5_TxWk-Epithelial-Penis_Foreskin_Fibroblast_Primary_Cells_skin02,5_TxWk-ENCODE2012-HepG2_Hepatocellular_Carcinoma,5_TxWk-Blood_&_T-cell-CD3_Primary_Cells_Cord_BI,5_TxWk-Brain-Brain_Hippocampus_Middl…	ZMYND11
chr10	190877	352346	pat_130	Gain	chr10	234977	235121	234977	235121	144	intronic	ZMYND11	Bird_HAR38	HAR_Merge50-00180	5_TxWk-HSC_&_B-cell-CD19_Primary_Cells_Peripheral_UW,5_TxWk-Heart-Left_Ventricle,5_TxWk-Blood_&_T-cell-CD4+_CD25-_CD45RA+_Naive_Primary_Cells,5_TxWk-ES-deriv-hESC_Derived_CD56+_Ectoderm_Cultured_Cells,5_TxWk-Epithelial-Penis_Foreskin_Fibroblast_Primary_Cells_skin02,5_TxWk-ENCODE2012-HepG2_Hepatocellular_Carcinoma,5_TxWk-Blood_&_T-cell-CD3_Primary_Cells_Cord_BI,5_TxWk-Brain-Brain_Hippocampus_Middl…	ZMYND11
chr10	190878	327832	pat_131	Gain	chr10	234977	235121	234977	235121	144	intronic	ZMYND11	Bird_HAR38	HAR_Merge50-00180	5_TxWk-HSC_&_B-cell-CD19_Primary_Cells_Peripheral_UW,5_TxWk-Heart-Left_Ventricle,5_TxWk-Blood_&_T-cell-CD4+_CD25-_CD45RA+_Naive_Primary_Cells,5_TxWk-ES-deriv-hESC_Derived_CD56+_Ectoderm_Cultured_Cells,5_TxWk-Epithelial-Penis_Foreskin_Fibroblast_Primary_Cells_skin02,5_TxWk-ENCODE2012-HepG2_Hepatocellular_Carcinoma,5_TxWk-Blood_&_T-cell-CD3_Primary_Cells_Cord_BI,5_TxWk-Brain-Brain_Hippocampus_Middl…	ZMYND11
chr10	190878	352330	pat_132	Gain	chr10	234977	235121	234977	235121	144	intronic	ZMYND11	Bird_HAR38	HAR_Merge50-00180	5_TxWk-HSC_&_B-cell-CD19_Primary_Cells_Peripheral_UW,5_TxWk-Heart-Left_Ventricle,5_TxWk-Blood_&_T-cell-CD4+_CD25-_CD45RA+_Naive_Primary_Cells,5_TxWk-ES-deriv-hESC_Derived_CD56+_Ectoderm_Cultured_Cells,5_TxWk-Epithelial-Penis_Foreskin_Fibroblast_Primary_Cells_skin02,5_TxWk-ENCODE2012-HepG2_Hepatocellular_Carcinoma,5_TxWk-Blood_&_T-cell-CD3_Primary_Cells_Cord_BI,5_TxWk-Brain-Brain_Hippocampus_Middl…	ZMYND11
chr10	190878	352346	pat_133	Gain	chr10	234977	235121	234977	235121	144	intronic	ZMYND11	Bird_HAR38	HAR_Merge50-00180	5_TxWk-HSC_&_B-cell-CD19_Primary_Cells_Peripheral_UW,5_TxWk-Heart-Left_Ventricle,5_TxWk-Blood_&_T-cell-CD4+_CD25-_CD45RA+_Naive_Primary_Cells,5_TxWk-ES-deriv-hESC_Derived_CD56+_Ectoderm_Cultured_Cells,5_TxWk-Epithelial-Penis_Foreskin_Fibroblast_Primary_Cells_skin02,5_TxWk-ENCODE2012-HepG2_Hepatocellular_Carcinoma,5_TxWk-Blood_&_T-cell-CD3_Primary_Cells_Cord_BI,5_TxWk-Brain-Brain_Hippocampus_Middl…	ZMYND11
chr10	208714	547669	pat_013	Loss	chr10	234977	235121	234977	235121	144	intronic	ZMYND11	Bird_HAR38	HAR_Merge50-00180	5_TxWk-HSC_&_B-cell-CD19_Primary_Cells_Peripheral_UW,5_TxWk-Heart-Left_Ventricle,5_TxWk-Blood_&_T-cell-CD4+_CD25-_CD45RA+_Naive_Primary_Cells,5_TxWk-ES-deriv-hESC_Derived_CD56+_Ectoderm_Cultured_Cells,5_TxWk-Epithelial-Penis_Foreskin_Fibroblast_Primary_Cells_skin02,5_TxWk-ENCODE2012-HepG2_Hepatocellular_Carcinoma,5_TxWk-Blood_&_T-cell-CD3_Primary_Cells_Cord_BI,5_TxWk-Brain-Brain_Hippocampus_Middl…	ZMYND11
chr10	235094	239473	pat_010	Loss	chr10	234977	235121	235094	235121	27	intronic	ZMYND11	Bird_HAR38	HAR_Merge50-00180	5_TxWk-HSC_&_B-cell-CD19_Primary_Cells_Peripheral_UW,5_TxWk-Heart-Left_Ventricle,5_TxWk-Blood_&_T-cell-CD4+_CD25-_CD45RA+_Naive_Primary_Cells,5_TxWk-ES-deriv-hESC_Derived_CD56+_Ectoderm_Cultured_Cells,5_TxWk-Epithelial-Penis_Foreskin_Fibroblast_Primary_Cells_skin02,5_TxWk-ENCODE2012-HepG2_Hepatocellular_Carcinoma,5_TxWk-Blood_&_T-cell-CD3_Primary_Cells_Cord_BI,5_TxWk-Brain-Brain_Hippocampus_Middl…	ZMYND11
chr10	1669474	1770039	pat_010	Gain	chr10	1709764	1709899	1709764	1709899	135	intronic	ADARB2	Bird_HAR513	HAR_Merge50-00181	9_Het-Epithelial-Penis_Foreskin_Fibroblast_Primary_Cells_skin02,15_Quies-ES-deriv-hESC_Derived_CD56+_Mesoderm_Cultured_Cells,14_ReprPCWk-Muscle-Fetal_Muscle_Trunk,15_Quies-Other-Pancreas,14_ReprPCWk-ENCODE2012-Dnd41_TCell_Leukemia,15_Quies-Digestive-Rectal_Mucosa.Donor_29,14_ReprPCWk-ENCODE2012-A549_EtOH_0.02pct_Lung_Carcinoma,15_Quies-Brain-Brain_Mid_Frontal_Lobe,15_Quies-Sm._Muscle-Rectal_Smoot…
chr10	2095762	2201822	pat_010	Loss	chr10	2117487	2117687	2117487	2117687	200	intergenic	LINC00700,LINC00701	Bird_HAR515	HAR_Merge50-00182	9_Het-Epithelial-Penis_Foreskin_Fibroblast_Primary_Cells_skin02,15_Quies-ES-deriv-hESC_Derived_CD56+_Mesoderm_Cultured_Cells,15_Quies-Other-Pancreas,9_Het-ENCODE2012-NHLF_Lung_Fibroblasts,9_Het-Digestive-Rectal_Mucosa.Donor_29,14_ReprPCWk-ENCODE2012-A549_EtOH_0.02pct_Lung_Carcinoma,15_Quies-Other-Spleen,15_Quies-Brain-Brain_Mid_Frontal_Lobe,15_Quies-Sm._Muscle-Rectal_Smooth_Muscle,15_Quies-ENCODE…
chr10	4714052	7912078	pat_134	Gain	chr10	6772058	6772220	6772058	6772220	162	intergenic	PRKCQ-AS1,LINC00707	Bird_HAR519	HAR_Merge50-00183	15_Quies-ES-deriv-hESC_Derived_CD56+_Mesoderm_Cultured_Cells,14_ReprPCWk-Digestive-Colonic_Mucosa,14_ReprPCWk-Muscle-Fetal_Muscle_Trunk,14_ReprPCWk-HSC_&_B-cell-CD19_Primary_Cells_Peripheral_UW,14_ReprPCWk-ENCODE2012-Dnd41_TCell_Leukemia,15_Quies-Other-Pancreas,13_ReprPC-HSC_&_B-cell-CD14_Primary_Cells,5_TxWk-Epithelial-Penis_Foreskin_Fibroblast_Primary_Cells_skin02,2_TssAFlnk-Epithelial-Penis_Fo…	SFMBT2,ITIH5
chr10	4714052	7912078	pat_134	Gain	chr10	6899801	6899948	6899801	6899948	147	intergenic	LINC00707,SFMBT2	Bird_HAR521	HAR_Merge50-00184	15_Quies-ES-deriv-hESC_Derived_CD56+_Mesoderm_Cultured_Cells,15_Quies-Other-Pancreas,15_Quies-Digestive-Rectal_Mucosa.Donor_29,15_Quies-Sm._Muscle-Duodenum_Smooth_Muscle,15_Quies-Other-Spleen,15_Quies-Brain-Brain_Mid_Frontal_Lobe,15_Quies-Sm._Muscle-Rectal_Smooth_Muscle,15_Quies-ENCODE2012-HeLa-S3_Cervical_Carcinoma,15_Quies-HSC_&_B-cell-CD14_Primary_Cells,14_ReprPCWk-Heart-Left_Ventricle,15_Quie…
chr10	4714052	7912078	pat_134	Gain	chr10	6930626	6930779	6930626	6930779	153	intergenic	LINC00707,SFMBT2	Bird_HAR523	HAR_Merge50-00185	15_Quies-ES-deriv-hESC_Derived_CD56+_Mesoderm_Cultured_Cells,14_ReprPCWk-HSC_&_B-cell-CD19_Primary_Cells_Peripheral_UW,15_Quies-Other-Pancreas,15_Quies-Digestive-Rectal_Mucosa.Donor_29,15_Quies-Other-Spleen,15_Quies-Brain-Brain_Mid_Frontal_Lobe,15_Quies-Sm._Muscle-Rectal_Smooth_Muscle,15_Quies-ENCODE2012-HeLa-S3_Cervical_Carcinoma,15_Quies-HSC_&_B-cell-CD14_Primary_Cells,15_Quies-ESC-ES-WA7_Cell_…
chr10	4714052	7912078	pat_134	Gain	chr10	7114637	7114789	7114637	7114789	152	intergenic	LINC00707,SFMBT2	Bird_HAR388	HAR_Merge50-00186	15_Quies-ES-deriv-hESC_Derived_CD56+_Mesoderm_Cultured_Cells,14_ReprPCWk-HSC_&_B-cell-CD19_Primary_Cells_Peripheral_UW,14_ReprPCWk-ENCODE2012-Dnd41_TCell_Leukemia,15_Quies-Other-Pancreas,15_Quies-Digestive-Rectal_Mucosa.Donor_29,15_Quies-Other-Spleen,15_Quies-Brain-Brain_Mid_Frontal_Lobe,15_Quies-Sm._Muscle-Rectal_Smooth_Muscle,15_Quies-HSC_&_B-cell-CD14_Primary_Cells,14_ReprPCWk-Heart-Left_Ventr…
chr10	4714052	7912078	pat_134	Gain	chr10	7261978	7262269	7261978	7262269	291	intronic	SFMBT2	Prabhakar_HAR986	HAR_Merge50-00187	5_TxWk-HSC_&_B-cell-CD19_Primary_Cells_Peripheral_UW,15_Quies-ES-deriv-hESC_Derived_CD56+_Mesoderm_Cultured_Cells,5_TxWk-Heart-Left_Ventricle,5_TxWk-Blood_&_T-cell-CD4+_CD25-_CD45RA+_Naive_Primary_Cells,15_Quies-Other-Pancreas,15_Quies-Digestive-Rectal_Mucosa.Donor_29,5_TxWk-Epithelial-Penis_Foreskin_Fibroblast_Primary_Cells_skin02,9_Het-Digestive-Rectal_Mucosa.Donor_29,15_Quies-Sm._Muscle-Duoden…	SFMBT2
chr10	4714052	7912078	pat_134	Gain	chr10	7362173	7362240	7362173	7362240	67	intronic	SFMBT2	Toh_HAR215	HAR_Merge50-00188	15_Quies-ES-deriv-hESC_Derived_CD56+_Mesoderm_Cultured_Cells,5_TxWk-Heart-Left_Ventricle,15_Quies-Other-Pancreas,15_Quies-Digestive-Rectal_Mucosa.Donor_29,12_EnhBiv-ESC-HUES48_Cell_Line,15_Quies-Sm._Muscle-Duodenum_Smooth_Muscle,15_Quies-Other-Spleen,15_Quies-Sm._Muscle-Rectal_Smooth_Muscle,9_Het-ESC-H9_Cell_Line,15_Quies-iPSC-iPS-20b_Cell_Line,7_Enh-Blood_&_T-cell-CD3_Primary_Cells_Peripheral_UW…
chr10	6753614	6781338	pat_010	Gain	chr10	6772058	6772220	6772058	6772220	162	intergenic	PRKCQ-AS1,LINC00707	Bird_HAR519	HAR_Merge50-00183	15_Quies-ES-deriv-hESC_Derived_CD56+_Mesoderm_Cultured_Cells,14_ReprPCWk-Digestive-Colonic_Mucosa,14_ReprPCWk-Muscle-Fetal_Muscle_Trunk,14_ReprPCWk-HSC_&_B-cell-CD19_Primary_Cells_Peripheral_UW,14_ReprPCWk-ENCODE2012-Dnd41_TCell_Leukemia,15_Quies-Other-Pancreas,13_ReprPC-HSC_&_B-cell-CD14_Primary_Cells,5_TxWk-Epithelial-Penis_Foreskin_Fibroblast_Primary_Cells_skin02,2_TssAFlnk-Epithelial-Penis_Fo…	SFMBT2,ITIH5
chr10	6769296	6774270	pat_027	Loss	chr10	6772058	6772220	6772058	6772220	162	intergenic	PRKCQ-AS1,LINC00707	Bird_HAR519	HAR_Merge50-00183	15_Quies-ES-deriv-hESC_Derived_CD56+_Mesoderm_Cultured_Cells,14_ReprPCWk-Digestive-Colonic_Mucosa,14_ReprPCWk-Muscle-Fetal_Muscle_Trunk,14_ReprPCWk-HSC_&_B-cell-CD19_Primary_Cells_Peripheral_UW,14_ReprPCWk-ENCODE2012-Dnd41_TCell_Leukemia,15_Quies-Other-Pancreas,13_ReprPC-HSC_&_B-cell-CD14_Primary_Cells,5_TxWk-Epithelial-Penis_Foreskin_Fibroblast_Primary_Cells_skin02,2_TssAFlnk-Epithelial-Penis_Fo…	SFMBT2,ITIH5
chr10	6898218	6905704	pat_010	Gain	chr10	6899801	6899948	6899801	6899948	147	intergenic	LINC00707,SFMBT2	Bird_HAR521	HAR_Merge50-00184	15_Quies-ES-deriv-hESC_Derived_CD56+_Mesoderm_Cultured_Cells,15_Quies-Other-Pancreas,15_Quies-Digestive-Rectal_Mucosa.Donor_29,15_Quies-Sm._Muscle-Duodenum_Smooth_Muscle,15_Quies-Other-Spleen,15_Quies-Brain-Brain_Mid_Frontal_Lobe,15_Quies-Sm._Muscle-Rectal_Smooth_Muscle,15_Quies-ENCODE2012-HeLa-S3_Cervical_Carcinoma,15_Quies-HSC_&_B-cell-CD14_Primary_Cells,14_ReprPCWk-Heart-Left_Ventricle,15_Quie…
chr10	7017354	7117267	pat_010	Gain	chr10	7114637	7114789	7114637	7114789	152	intergenic	LINC00707,SFMBT2	Bird_HAR388	HAR_Merge50-00186	15_Quies-ES-deriv-hESC_Derived_CD56+_Mesoderm_Cultured_Cells,14_ReprPCWk-HSC_&_B-cell-CD19_Primary_Cells_Peripheral_UW,14_ReprPCWk-ENCODE2012-Dnd41_TCell_Leukemia,15_Quies-Other-Pancreas,15_Quies-Digestive-Rectal_Mucosa.Donor_29,15_Quies-Other-Spleen,15_Quies-Brain-Brain_Mid_Frontal_Lobe,15_Quies-Sm._Muscle-Rectal_Smooth_Muscle,15_Quies-HSC_&_B-cell-CD14_Primary_Cells,14_ReprPCWk-Heart-Left_Ventr…
chr10	7924464	12861437	pat_134	Gain	chr10	8091639	8091666	8091639	8091666	27	downstream	GATA3-AS1	Toh_HAR388	HAR_Merge50-00189	7_Enh-Heart-Aorta,2_TssAFlnk-Other-Placenta_Amnion,13_ReprPC-HSC_&_B-cell-CD14_Primary_Cells,1_TssA-ES-deriv-hESC_Derived_CD56+_Mesoderm_Cultured_Cells,1_TssA-ES-deriv-H1_BMP4_Derived_Trophoblast_Cultured_Cells,12_EnhBiv-HSC_&_B-cell-CD19_Primary_Cells_Peripheral_UW,11_BivFlnk-Muscle-Skeletal_Muscle_Female,13_ReprPC-Digestive-Rectal_Mucosa.Donor_31,11_BivFlnk-Sm._Muscle-Stomach_Smooth_Muscle,11_B…
chr10	7924464	12861437	pat_134	Gain	chr10	8164895	8165324	8164895	8165324	429	intergenic	GATA3,NONE	Bird_HAR528	HAR_Merge50-00190	9_Het-Epithelial-Penis_Foreskin_Fibroblast_Primary_Cells_skin02,15_Quies-ES-deriv-hESC_Derived_CD56+_Mesoderm_Cultured_Cells,14_ReprPCWk-HSC_&_B-cell-CD19_Primary_Cells_Peripheral_UW,15_Quies-Other-Pancreas,15_Quies-Other-Spleen,15_Quies-Sm._Muscle-Rectal_Smooth_Muscle,15_Quies-iPSC-iPS-20b_Cell_Line,14_ReprPCWk-Heart-Left_Ventricle,14_ReprPCWk-HSC_&_B-cell-CD14_Primary_Cells,14_ReprPCWk-Digestiv…
chr10	7924464	12861437	pat_134	Gain	chr10	8401953	8402142	8401953	8402142	189	intergenic	GATA3,NONE	Prabhakar_HAR889	HAR_Merge50-00191	15_Quies-ES-deriv-hESC_Derived_CD56+_Mesoderm_Cultured_Cells,15_Quies-Other-Pancreas,15_Quies-Digestive-Rectal_Mucosa.Donor_29,15_Quies-Sm._Muscle-Duodenum_Smooth_Muscle,15_Quies-Other-Spleen,15_Quies-Brain-Brain_Mid_Frontal_Lobe,15_Quies-Sm._Muscle-Rectal_Smooth_Muscle,15_Quies-ENCODE2012-HeLa-S3_Cervical_Carcinoma,15_Quies-HSC_&_B-cell-CD14_Primary_Cells,15_Quies-iPSC-iPS-20b_Cell_Line,7_Enh-Bl…
chr10	7924464	12861437	pat_134	Gain	chr10	8546534	8547054	8546534	8547054	520	intergenic	GATA3,NONE	BUSH_HAR62,Toh_HAR132,Bird_HAR178	HAR_Merge50-00192	9_Het-Epithelial-Penis_Foreskin_Fibroblast_Primary_Cells_skin02,14_ReprPCWk-Muscle-Fetal_Muscle_Trunk,15_Quies-Other-Pancreas,15_Quies-Digestive-Rectal_Mucosa.Donor_29,15_Quies-Sm._Muscle-Duodenum_Smooth_Muscle,15_Quies-Other-Spleen,15_Quies-Sm._Muscle-Rectal_Smooth_Muscle,15_Quies-HSC_&_B-cell-CD14_Primary_Cells,14_ReprPCWk-Heart-Left_Ventricle,15_Quies-HSC_&_B-cell-CD15_Primary_Cells,7_Enh-ES-d…
chr10	7924464	12861437	pat_134	Gain	chr10	8576147	8576521	8576147	8576521	374	intergenic	GATA3,NONE	BUSH_HAR18,Toh_HAR79,Bird_HAR58	HAR_Merge50-00193	11_BivFlnk-Other-Fetal_Kidney,15_Quies-ES-deriv-hESC_Derived_CD56+_Mesoderm_Cultured_Cells,15_Quies-Other-Pancreas,15_Quies-Digestive-Rectal_Mucosa.Donor_29,15_Quies-Sm._Muscle-Duodenum_Smooth_Muscle,15_Quies-Other-Spleen,15_Quies-Brain-Brain_Mid_Frontal_Lobe,15_Quies-Sm._Muscle-Rectal_Smooth_Muscle,15_Quies-ENCODE2012-HeLa-S3_Cervical_Carcinoma,15_Quies-HSC_&_B-cell-CD14_Primary_Cells,15_Quies-i…
chr10	7924464	12861437	pat_134	Gain	chr10	9241847	9242596	9241847	9242596	749	intergenic	GATA3,SFTA1P	Pollard_HAR142,Toh_HAR27,Prabhakar_HAR199	HAR_Merge50-00194	15_Quies-ES-deriv-hESC_Derived_CD56+_Mesoderm_Cultured_Cells,15_Quies-Other-Pancreas,15_Quies-Digestive-Rectal_Mucosa.Donor_29,15_Quies-Sm._Muscle-Duodenum_Smooth_Muscle,14_ReprPCWk-ENCODE2012-A549_EtOH_0.02pct_Lung_Carcinoma,15_Quies-Other-Spleen,15_Quies-Brain-Brain_Mid_Frontal_Lobe,13_ReprPC-HSC_&_B-cell-CD56_Primary_Cells,15_Quies-Sm._Muscle-Rectal_Smooth_Muscle,15_Quies-ENCODE2012-HeLa-S3_Ce…
chr10	7924464	12861437	pat_134	Gain	chr10	10085012	10085245	10085012	10085245	233	intergenic	GATA3,SFTA1P	Bird_HAR500	HAR_Merge50-00195	15_Quies-ES-deriv-hESC_Derived_CD56+_Mesoderm_Cultured_Cells,15_Quies-Other-Pancreas,15_Quies-Digestive-Rectal_Mucosa.Donor_29,15_Quies-Sm._Muscle-Duodenum_Smooth_Muscle,15_Quies-Other-Spleen,15_Quies-Brain-Brain_Mid_Frontal_Lobe,15_Quies-Sm._Muscle-Rectal_Smooth_Muscle,15_Quies-ENCODE2012-HeLa-S3_Cervical_Carcinoma,15_Quies-HSC_&_B-cell-CD14_Primary_Cells,15_Quies-iPSC-iPS-20b_Cell_Line,15_Quies…
chr10	7924464	12861437	pat_134	Gain	chr10	10372661	10372817	10372661	10372817	156	intergenic	NONE,SFTA1P	Prabhakar_HAR542	HAR_Merge50-00196	15_Quies-ES-deriv-hESC_Derived_CD56+_Mesoderm_Cultured_Cells,14_ReprPCWk-ENCODE2012-Dnd41_TCell_Leukemia,15_Quies-Other-Pancreas,15_Quies-Digestive-Rectal_Mucosa.Donor_29,15_Quies-Sm._Muscle-Duodenum_Smooth_Muscle,15_Quies-Other-Spleen,15_Quies-Brain-Brain_Mid_Frontal_Lobe,15_Quies-Sm._Muscle-Rectal_Smooth_Muscle,15_Quies-ENCODE2012-HeLa-S3_Cervical_Carcinoma,15_Quies-HSC_&_B-cell-CD14_Primary_Ce…	LINC00710
chr10	7924464	12861437	pat_134	Gain	chr10	10474238	10474501	10474238	10474501	263	intergenic	NONE,SFTA1P	Pollard_HAR22,Prabhakar_HAR306	HAR_Merge50-00197	15_Quies-ES-deriv-hESC_Derived_CD56+_Mesoderm_Cultured_Cells,15_Quies-Other-Pancreas,14_ReprPCWk-ENCODE2012-Dnd41_TCell_Leukemia,15_Quies-Digestive-Rectal_Mucosa.Donor_29,15_Quies-Sm._Muscle-Duodenum_Smooth_Muscle,15_Quies-Other-Spleen,15_Quies-Brain-Brain_Mid_Frontal_Lobe,15_Quies-Sm._Muscle-Rectal_Smooth_Muscle,15_Quies-ENCODE2012-HeLa-S3_Cervical_Carcinoma,15_Quies-HSC_&_B-cell-CD14_Primary_Ce…
chr10	7924464	12861437	pat_134	Gain	chr10	10886858	10887143	10886858	10887143	285	intergenic	SFTA1P,LINC00710	Bird_HAR170	HAR_Merge50-00198	15_Quies-ES-deriv-hESC_Derived_CD56+_Mesoderm_Cultured_Cells,14_ReprPCWk-HSC_&_B-cell-CD19_Primary_Cells_Peripheral_UW,14_ReprPCWk-ENCODE2012-Dnd41_TCell_Leukemia,15_Quies-Other-Pancreas,15_Quies-Digestive-Rectal_Mucosa.Donor_29,15_Quies-Sm._Muscle-Duodenum_Smooth_Muscle,15_Quies-Other-Spleen,15_Quies-Brain-Brain_Mid_Frontal_Lobe,15_Quies-Sm._Muscle-Rectal_Smooth_Muscle,15_Quies-ENCODE2012-HeLa-S…	HV745905,BC032914
chr10	7924464	12861437	pat_134	Gain	chr10	11077670	11078049	11077670	11078049	379	intronic	CELF2	Toh_HAR471,Prabhakar_HAR507	HAR_Merge50-00199	8_ZNF/Rpts-Muscle-Fetal_Muscle_Leg,14_ReprPCWk-HSC_&_B-cell-CD19_Primary_Cells_Peripheral_UW,15_Quies-Other-Pancreas,15_Quies-Digestive-Rectal_Mucosa.Donor_29,15_Quies-Other-Spleen,5_TxWk-Brain-Brain_Hippocampus_Middle,15_Quies-ENCODE2012-HeLa-S3_Cervical_Carcinoma,15_Quies-HSC_&_B-cell-CD14_Primary_Cells,2_TssAFlnk-ES-deriv-hESC_Derived_CD184+_Endoderm_Cultured_Cells,7_Enh-ES-deriv-H1_BMP4_Deriv…	LINC00710
chr10	8134370	8175916	pat_010	Gain	chr10	8164895	8165324	8164895	8165324	429	intergenic	GATA3,NONE	Bird_HAR528	HAR_Merge50-00190	9_Het-Epithelial-Penis_Foreskin_Fibroblast_Primary_Cells_skin02,15_Quies-ES-deriv-hESC_Derived_CD56+_Mesoderm_Cultured_Cells,14_ReprPCWk-HSC_&_B-cell-CD19_Primary_Cells_Peripheral_UW,15_Quies-Other-Pancreas,15_Quies-Other-Spleen,15_Quies-Sm._Muscle-Rectal_Smooth_Muscle,15_Quies-iPSC-iPS-20b_Cell_Line,14_ReprPCWk-Heart-Left_Ventricle,14_ReprPCWk-HSC_&_B-cell-CD14_Primary_Cells,14_ReprPCWk-Digestiv…
chr10	8385243	8416992	pat_010	Gain	chr10	8401953	8402142	8401953	8402142	189	intergenic	GATA3,NONE	Prabhakar_HAR889	HAR_Merge50-00191	15_Quies-ES-deriv-hESC_Derived_CD56+_Mesoderm_Cultured_Cells,15_Quies-Other-Pancreas,15_Quies-Digestive-Rectal_Mucosa.Donor_29,15_Quies-Sm._Muscle-Duodenum_Smooth_Muscle,15_Quies-Other-Spleen,15_Quies-Brain-Brain_Mid_Frontal_Lobe,15_Quies-Sm._Muscle-Rectal_Smooth_Muscle,15_Quies-ENCODE2012-HeLa-S3_Cervical_Carcinoma,15_Quies-HSC_&_B-cell-CD14_Primary_Cells,15_Quies-iPSC-iPS-20b_Cell_Line,7_Enh-Bl…
chr10	9223859	9275474	pat_010	Loss	chr10	9241847	9242596	9241847	9242596	749	intergenic	GATA3,SFTA1P	Pollard_HAR142,Toh_HAR27,Prabhakar_HAR199	HAR_Merge50-00194	15_Quies-ES-deriv-hESC_Derived_CD56+_Mesoderm_Cultured_Cells,15_Quies-Other-Pancreas,15_Quies-Digestive-Rectal_Mucosa.Donor_29,15_Quies-Sm._Muscle-Duodenum_Smooth_Muscle,14_ReprPCWk-ENCODE2012-A549_EtOH_0.02pct_Lung_Carcinoma,15_Quies-Other-Spleen,15_Quies-Brain-Brain_Mid_Frontal_Lobe,13_ReprPC-HSC_&_B-cell-CD56_Primary_Cells,15_Quies-Sm._Muscle-Rectal_Smooth_Muscle,15_Quies-ENCODE2012-HeLa-S3_Ce…
chr10	10356142	10431381	pat_010	Loss	chr10	10372661	10372817	10372661	10372817	156	intergenic	NONE,SFTA1P	Prabhakar_HAR542	HAR_Merge50-00196	15_Quies-ES-deriv-hESC_Derived_CD56+_Mesoderm_Cultured_Cells,14_ReprPCWk-ENCODE2012-Dnd41_TCell_Leukemia,15_Quies-Other-Pancreas,15_Quies-Digestive-Rectal_Mucosa.Donor_29,15_Quies-Sm._Muscle-Duodenum_Smooth_Muscle,15_Quies-Other-Spleen,15_Quies-Brain-Brain_Mid_Frontal_Lobe,15_Quies-Sm._Muscle-Rectal_Smooth_Muscle,15_Quies-ENCODE2012-HeLa-S3_Cervical_Carcinoma,15_Quies-HSC_&_B-cell-CD14_Primary_Ce…	LINC00710
chr10	10879880	10931630	pat_010	Gain	chr10	10886858	10887143	10886858	10887143	285	intergenic	SFTA1P,LINC00710	Bird_HAR170	HAR_Merge50-00198	15_Quies-ES-deriv-hESC_Derived_CD56+_Mesoderm_Cultured_Cells,14_ReprPCWk-HSC_&_B-cell-CD19_Primary_Cells_Peripheral_UW,14_ReprPCWk-ENCODE2012-Dnd41_TCell_Leukemia,15_Quies-Other-Pancreas,15_Quies-Digestive-Rectal_Mucosa.Donor_29,15_Quies-Sm._Muscle-Duodenum_Smooth_Muscle,15_Quies-Other-Spleen,15_Quies-Brain-Brain_Mid_Frontal_Lobe,15_Quies-Sm._Muscle-Rectal_Smooth_Muscle,15_Quies-ENCODE2012-HeLa-S…	HV745905,BC032914
chr10	11064085	11081947	pat_010	Loss	chr10	11077670	11078049	11077670	11078049	379	intronic	CELF2	Toh_HAR471,Prabhakar_HAR507	HAR_Merge50-00199	8_ZNF/Rpts-Muscle-Fetal_Muscle_Leg,14_ReprPCWk-HSC_&_B-cell-CD19_Primary_Cells_Peripheral_UW,15_Quies-Other-Pancreas,15_Quies-Digestive-Rectal_Mucosa.Donor_29,15_Quies-Other-Spleen,5_TxWk-Brain-Brain_Hippocampus_Middle,15_Quies-ENCODE2012-HeLa-S3_Cervical_Carcinoma,15_Quies-HSC_&_B-cell-CD14_Primary_Cells,2_TssAFlnk-ES-deriv-hESC_Derived_CD184+_Endoderm_Cultured_Cells,7_Enh-ES-deriv-H1_BMP4_Deriv…	LINC00710
chr10	12873359	27758313	pat_134	Gain	chr10	14144812	14144979	14144812	14144979	167	intronic	FRMD4A	Prabhakar_HAR25	HAR_Merge50-00200	15_Quies-ES-deriv-hESC_Derived_CD56+_Mesoderm_Cultured_Cells,14_ReprPCWk-Muscle-Fetal_Muscle_Trunk,15_Quies-Other-Pancreas,14_ReprPCWk-ENCODE2012-Dnd41_TCell_Leukemia,15_Quies-Sm._Muscle-Duodenum_Smooth_Muscle,14_ReprPCWk-ENCODE2012-A549_EtOH_0.02pct_Lung_Carcinoma,15_Quies-Brain-Brain_Mid_Frontal_Lobe,14_ReprPCWk-Mesench-Bone_Marrow_Derived_Mesenchymal_Stem_Cell_Cultured_Cells,15_Quies-ENCODE201…	FRMD4A
chr10	12873359	27758313	pat_134	Gain	chr10	14233546	14233781	14233546	14233781	235	intronic	FRMD4A	Bird_HAR512	HAR_Merge50-00201	15_Quies-ES-deriv-hESC_Derived_CD56+_Mesoderm_Cultured_Cells,14_ReprPCWk-Digestive-Colonic_Mucosa,14_ReprPCWk-HSC_&_B-cell-CD19_Primary_Cells_Peripheral_UW,15_Quies-Other-Pancreas,14_ReprPCWk-ENCODE2012-Dnd41_TCell_Leukemia,13_ReprPC-IMR90-IMR90_Cell_Line,14_ReprPCWk-ENCODE2012-A549_EtOH_0.02pct_Lung_Carcinoma,15_Quies-Other-Spleen,15_Quies-Brain-Brain_Mid_Frontal_Lobe,15_Quies-iPSC-iPS-20b_Cell_…
chr10	12873359	27758313	pat_134	Gain	chr10	14765321	14765670	14765321	14765670	349	intronic	FAM107B	Bird_HAR134	HAR_Merge50-00202	15_Quies-ES-deriv-hESC_Derived_CD56+_Mesoderm_Cultured_Cells,14_ReprPCWk-Muscle-Fetal_Muscle_Trunk,14_ReprPCWk-ENCODE2012-Dnd41_TCell_Leukemia,15_Quies-Other-Pancreas,15_Quies-Digestive-Rectal_Mucosa.Donor_29,15_Quies-Sm._Muscle-Duodenum_Smooth_Muscle,15_Quies-Brain-Brain_Mid_Frontal_Lobe,14_ReprPCWk-Mesench-Bone_Marrow_Derived_Mesenchymal_Stem_Cell_Cultured_Cells,15_Quies-Sm._Muscle-Rectal_Smoot…	FAM107B
chr10	12873359	27758313	pat_134	Gain	chr10	16500290	16500611	16500290	16500611	321	intronic	PTER	Toh_HAR329,Prabhakar_HAR987	HAR_Merge50-00203	5_TxWk-HSC_&_B-cell-CD19_Primary_Cells_Peripheral_UW,15_Quies-ES-deriv-hESC_Derived_CD56+_Mesoderm_Cultured_Cells,5_TxWk-Heart-Left_Ventricle,5_TxWk-Blood_&_T-cell-CD4+_CD25-_CD45RA+_Naive_Primary_Cells,7_Enh-Other-Adult_Liver,5_TxWk-Blood_&_T-cell-CD3_Primary_Cells_Cord_BI,15_Quies-Sm._Muscle-Duodenum_Smooth_Muscle,15_Quies-Brain-Brain_Mid_Frontal_Lobe,15_Quies-Sm._Muscle-Rectal_Smooth_Muscle,15…
chr10	12873359	27758313	pat_134	Gain	chr10	16654584	16654741	16654584	16654741	157	intronic	RSU1	Pollard_HAR201	HAR_Merge50-00204	15_Quies-ES-deriv-hESC_Derived_CD56+_Mesoderm_Cultured_Cells,5_TxWk-Heart-Left_Ventricle,5_TxWk-Blood_&_T-cell-CD4+_CD25-_CD45RA+_Naive_Primary_Cells,15_Quies-Digestive-Rectal_Mucosa.Donor_29,5_TxWk-Blood_&_T-cell-CD3_Primary_Cells_Cord_BI,15_Quies-Sm._Muscle-Duodenum_Smooth_Muscle,15_Quies-Other-Spleen,15_Quies-Brain-Brain_Mid_Frontal_Lobe,15_Quies-Sm._Muscle-Rectal_Smooth_Muscle,15_Quies-ENCODE…
chr10	12873359	27758313	pat_134	Gain	chr10	16705307	16705524	16705307	16705524	217	intronic	RSU1	Prabhakar_HAR261,BUSH_HAR61	HAR_Merge50-00205	5_TxWk-HSC_&_B-cell-CD19_Primary_Cells_Peripheral_UW,15_Quies-ES-deriv-hESC_Derived_CD56+_Mesoderm_Cultured_Cells,15_Quies-Other-Pancreas,15_Quies-Digestive-Rectal_Mucosa.Donor_29,5_TxWk-Blood_&_T-cell-CD3_Primary_Cells_Cord_BI,15_Quies-Sm._Muscle-Duodenum_Smooth_Muscle,15_Quies-Brain-Brain_Mid_Frontal_Lobe,15_Quies-Sm._Muscle-Rectal_Smooth_Muscle,15_Quies-ENCODE2012-HeLa-S3_Cervical_Carcinoma,15…
chr10	12873359	27758313	pat_134	Gain	chr10	17560564	17560822	17560564	17560822	258	intergenic	ST8SIA6,PTPLA	Toh_HAR80,Bird_HAR135	HAR_Merge50-00206	15_Quies-ES-deriv-hESC_Derived_CD56+_Mesoderm_Cultured_Cells,15_Quies-Other-Pancreas,15_Quies-Digestive-Rectal_Mucosa.Donor_29,15_Quies-Sm._Muscle-Duodenum_Smooth_Muscle,15_Quies-Other-Spleen,15_Quies-Brain-Brain_Mid_Frontal_Lobe,15_Quies-Sm._Muscle-Rectal_Smooth_Muscle,15_Quies-ENCODE2012-HeLa-S3_Cervical_Carcinoma,15_Quies-HSC_&_B-cell-CD14_Primary_Cells,15_Quies-iPSC-iPS-20b_Cell_Line,15_Quies…	RSU1
chr10	12873359	27758313	pat_134	Gain	chr10	20999099	20999307	20999099	20999307	208	intergenic	MIR4675,NEBL	Bird_HAR514	HAR_Merge50-00207	15_Quies-ES-deriv-hESC_Derived_CD56+_Mesoderm_Cultured_Cells,15_Quies-Other-Pancreas,15_Quies-Digestive-Rectal_Mucosa.Donor_29,15_Quies-Sm._Muscle-Duodenum_Smooth_Muscle,15_Quies-Other-Spleen,15_Quies-Brain-Brain_Mid_Frontal_Lobe,15_Quies-Sm._Muscle-Rectal_Smooth_Muscle,15_Quies-ENCODE2012-HeLa-S3_Cervical_Carcinoma,15_Quies-HSC_&_B-cell-CD14_Primary_Cells,15_Quies-iPSC-iPS-20b_Cell_Line,15_Quies…
chr10	12873359	27758313	pat_134	Gain	chr10	24250053	24250096	24250053	24250096	43	intronic	KIAA1217	Toh_HAR175	HAR_Merge50-00209	15_Quies-ES-deriv-hESC_Derived_CD56+_Mesoderm_Cultured_Cells,15_Quies-Other-Pancreas,15_Quies-Digestive-Rectal_Mucosa.Donor_29,15_Quies-Sm._Muscle-Duodenum_Smooth_Muscle,15_Quies-Other-Spleen,15_Quies-Brain-Brain_Mid_Frontal_Lobe,15_Quies-Sm._Muscle-Rectal_Smooth_Muscle,15_Quies-ENCODE2012-HeLa-S3_Cervical_Carcinoma,15_Quies-HSC_&_B-cell-CD14_Primary_Cells,15_Quies-iPSC-iPS-20b_Cell_Line,15_Quies…
chr10	12873359	27758313	pat_134	Gain	chr10	24783377	24783394	24783377	24783394	17	intronic	KIAA1217	Toh_HAR174	HAR_Merge50-00210	4_Tx-Muscle-Fetal_Muscle_Leg,6_EnhG-Digestive-Duodenum_Mucosa,5_TxWk-ENCODE2012-HepG2_Hepatocellular_Carcinoma,5_TxWk-ENCODE2012-NH-A_Astrocytes,15_Quies-Brain-Brain_Mid_Frontal_Lobe,15_Quies-HSC_&_B-cell-CD14_Primary_Cells,5_TxWk-Other-Spleen,15_Quies-HSC_&_B-cell-CD15_Primary_Cells,4_Tx-Other-Fetal_Adrenal_Gland,5_TxWk-Epithelial-Penis_Foreskin_Keratinocyte_Primary_Cells_skin02,5_TxWk-ENCODE201…	KIAA1217
chr10	12873359	27758313	pat_134	Gain	chr10	25017474	25017627	25017474	25017627	153	intergenic	ARHGAP21,PRTFDC1	Prabhakar_HAR449	HAR_Merge50-00211	15_Quies-ES-deriv-hESC_Derived_CD56+_Mesoderm_Cultured_Cells,15_Quies-Other-Pancreas,15_Quies-Digestive-Rectal_Mucosa.Donor_29,15_Quies-Sm._Muscle-Duodenum_Smooth_Muscle,15_Quies-Other-Spleen,15_Quies-Brain-Brain_Mid_Frontal_Lobe,15_Quies-Sm._Muscle-Rectal_Smooth_Muscle,15_Quies-ENCODE2012-HeLa-S3_Cervical_Carcinoma,15_Quies-HSC_&_B-cell-CD14_Primary_Cells,15_Quies-iPSC-iPS-20b_Cell_Line,7_Enh-ES…	ARHGAP21
chr10	12873359	27758313	pat_134	Gain	chr10	21757708	21758350	21757708	21758350	642	intergenic	NEBL-AS1,CASC10	Bird_HAR79	HAR_Merge50-00208	15_Quies-ES-deriv-hESC_Derived_CD56+_Mesoderm_Cultured_Cells,15_Quies-Other-Pancreas,15_Quies-Digestive-Rectal_Mucosa.Donor_29,15_Quies-Sm._Muscle-Duodenum_Smooth_Muscle,15_Quies-Other-Spleen,15_Quies-Brain-Brain_Mid_Frontal_Lobe,15_Quies-Sm._Muscle-Rectal_Smooth_Muscle,15_Quies-ENCODE2012-HeLa-S3_Cervical_Carcinoma,15_Quies-HSC_&_B-cell-CD14_Primary_Cells,15_Quies-iPSC-iPS-20b_Cell_Line,15_Quies…
chr10	14117489	14158974	pat_010	Gain	chr10	14144812	14144979	14144812	14144979	167	intronic	FRMD4A	Prabhakar_HAR25	HAR_Merge50-00200	15_Quies-ES-deriv-hESC_Derived_CD56+_Mesoderm_Cultured_Cells,14_ReprPCWk-Muscle-Fetal_Muscle_Trunk,15_Quies-Other-Pancreas,14_ReprPCWk-ENCODE2012-Dnd41_TCell_Leukemia,15_Quies-Sm._Muscle-Duodenum_Smooth_Muscle,14_ReprPCWk-ENCODE2012-A549_EtOH_0.02pct_Lung_Carcinoma,15_Quies-Brain-Brain_Mid_Frontal_Lobe,14_ReprPCWk-Mesench-Bone_Marrow_Derived_Mesenchymal_Stem_Cell_Cultured_Cells,15_Quies-ENCODE201…	FRMD4A
chr10	14126112	14169613	pat_012	Gain	chr10	14144812	14144979	14144812	14144979	167	intronic	FRMD4A	Prabhakar_HAR25	HAR_Merge50-00200	15_Quies-ES-deriv-hESC_Derived_CD56+_Mesoderm_Cultured_Cells,14_ReprPCWk-Muscle-Fetal_Muscle_Trunk,15_Quies-Other-Pancreas,14_ReprPCWk-ENCODE2012-Dnd41_TCell_Leukemia,15_Quies-Sm._Muscle-Duodenum_Smooth_Muscle,14_ReprPCWk-ENCODE2012-A549_EtOH_0.02pct_Lung_Carcinoma,15_Quies-Brain-Brain_Mid_Frontal_Lobe,14_ReprPCWk-Mesench-Bone_Marrow_Derived_Mesenchymal_Stem_Cell_Cultured_Cells,15_Quies-ENCODE201…	FRMD4A
chr10	16443740	16575093	pat_010	Loss	chr10	16500290	16500611	16500290	16500611	321	intronic	PTER	Toh_HAR329,Prabhakar_HAR987	HAR_Merge50-00203	5_TxWk-HSC_&_B-cell-CD19_Primary_Cells_Peripheral_UW,15_Quies-ES-deriv-hESC_Derived_CD56+_Mesoderm_Cultured_Cells,5_TxWk-Heart-Left_Ventricle,5_TxWk-Blood_&_T-cell-CD4+_CD25-_CD45RA+_Naive_Primary_Cells,7_Enh-Other-Adult_Liver,5_TxWk-Blood_&_T-cell-CD3_Primary_Cells_Cord_BI,15_Quies-Sm._Muscle-Duodenum_Smooth_Muscle,15_Quies-Brain-Brain_Mid_Frontal_Lobe,15_Quies-Sm._Muscle-Rectal_Smooth_Muscle,15…
chr10	16703190	16711761	pat_010	Gain	chr10	16705307	16705524	16705307	16705524	217	intronic	RSU1	Prabhakar_HAR261,BUSH_HAR61	HAR_Merge50-00205	5_TxWk-HSC_&_B-cell-CD19_Primary_Cells_Peripheral_UW,15_Quies-ES-deriv-hESC_Derived_CD56+_Mesoderm_Cultured_Cells,15_Quies-Other-Pancreas,15_Quies-Digestive-Rectal_Mucosa.Donor_29,5_TxWk-Blood_&_T-cell-CD3_Primary_Cells_Cord_BI,15_Quies-Sm._Muscle-Duodenum_Smooth_Muscle,15_Quies-Brain-Brain_Mid_Frontal_Lobe,15_Quies-Sm._Muscle-Rectal_Smooth_Muscle,15_Quies-ENCODE2012-HeLa-S3_Cervical_Carcinoma,15…
chr10	20991057	21053029	pat_010	Gain	chr10	20999099	20999307	20999099	20999307	208	intergenic	MIR4675,NEBL	Bird_HAR514	HAR_Merge50-00207	15_Quies-ES-deriv-hESC_Derived_CD56+_Mesoderm_Cultured_Cells,15_Quies-Other-Pancreas,15_Quies-Digestive-Rectal_Mucosa.Donor_29,15_Quies-Sm._Muscle-Duodenum_Smooth_Muscle,15_Quies-Other-Spleen,15_Quies-Brain-Brain_Mid_Frontal_Lobe,15_Quies-Sm._Muscle-Rectal_Smooth_Muscle,15_Quies-ENCODE2012-HeLa-S3_Cervical_Carcinoma,15_Quies-HSC_&_B-cell-CD14_Primary_Cells,15_Quies-iPSC-iPS-20b_Cell_Line,15_Quies…
chr10	33308087	33368644	pat_010	Loss	chr10	33321794	33321974	33321794	33321974	180	intergenic	ITGB1,NRP1	Prabhakar_HAR637	HAR_Merge50-00213	15_Quies-ES-deriv-hESC_Derived_CD56+_Mesoderm_Cultured_Cells,15_Quies-Other-Pancreas,15_Quies-Digestive-Rectal_Mucosa.Donor_29,5_TxWk-Epithelial-Penis_Foreskin_Fibroblast_Primary_Cells_skin02,15_Quies-Sm._Muscle-Duodenum_Smooth_Muscle,15_Quies-Other-Spleen,15_Quies-Brain-Brain_Mid_Frontal_Lobe,15_Quies-Sm._Muscle-Rectal_Smooth_Muscle,15_Quies-HSC_&_B-cell-CD14_Primary_Cells,15_Quies-iPSC-iPS-20b_…
chr10	33346697	34627212	pat_009	Gain	chr10	34217609	34217783	34217609	34217783	174	intergenic	LINC00838,PARD3	Bird_HAR174,Prabhakar_HAR148	HAR_Merge50-00214	15_Quies-ES-deriv-hESC_Derived_CD56+_Mesoderm_Cultured_Cells,15_Quies-Other-Pancreas,15_Quies-Digestive-Rectal_Mucosa.Donor_29,13_ReprPC-IMR90-IMR90_Cell_Line,15_Quies-Sm._Muscle-Duodenum_Smooth_Muscle,15_Quies-Other-Spleen,15_Quies-Brain-Brain_Mid_Frontal_Lobe,14_ReprPCWk-Mesench-Bone_Marrow_Derived_Mesenchymal_Stem_Cell_Cultured_Cells,15_Quies-Sm._Muscle-Rectal_Smooth_Muscle,15_Quies-HSC_&_B-ce…	PARD3
chr10	34210616	34263354	pat_010	Loss	chr10	34217609	34217783	34217609	34217783	174	intergenic	LINC00838,PARD3	Bird_HAR174,Prabhakar_HAR148	HAR_Merge50-00214	15_Quies-ES-deriv-hESC_Derived_CD56+_Mesoderm_Cultured_Cells,15_Quies-Other-Pancreas,15_Quies-Digestive-Rectal_Mucosa.Donor_29,13_ReprPC-IMR90-IMR90_Cell_Line,15_Quies-Sm._Muscle-Duodenum_Smooth_Muscle,15_Quies-Other-Spleen,15_Quies-Brain-Brain_Mid_Frontal_Lobe,14_ReprPCWk-Mesench-Bone_Marrow_Derived_Mesenchymal_Stem_Cell_Cultured_Cells,15_Quies-Sm._Muscle-Rectal_Smooth_Muscle,15_Quies-HSC_&_B-ce…	PARD3
chr10	36237534	36325138	pat_010	Loss	chr10	36238420	36239039	36238420	36239039	619	intergenic	FZD8,ANKRD30A	Bird_HAR516	HAR_Merge50-00215	15_Quies-Other-Pancreas,15_Quies-Digestive-Rectal_Mucosa.Donor_29,2_TssAFlnk-iPSC-iPS-18_Cell_Line,15_Quies-Sm._Muscle-Duodenum_Smooth_Muscle,15_Quies-Other-Spleen,2_TssAFlnk-ESC-HUES6_Cell_Line,15_Quies-Brain-Brain_Mid_Frontal_Lobe,15_Quies-Sm._Muscle-Rectal_Smooth_Muscle,15_Quies-ENCODE2012-HeLa-S3_Cervical_Carcinoma,15_Quies-HSC_&_B-cell-CD14_Primary_Cells,15_Quies-HSC_&_B-cell-CD15_Primary_Ce…	FZD8
chr10	38432450	38513999	pat_010	Gain	chr10	38475482	38475729	38475482	38475729	247	ncRNA_intronic	LOC100129055	Bird_HAR175	HAR_Merge50-00216	15_Quies-Other-Pancreas,15_Quies-Digestive-Rectal_Mucosa.Donor_29,15_Quies-Sm._Muscle-Duodenum_Smooth_Muscle,15_Quies-Other-Spleen,15_Quies-Brain-Brain_Mid_Frontal_Lobe,15_Quies-Sm._Muscle-Rectal_Smooth_Muscle,15_Quies-ENCODE2012-HeLa-S3_Cervical_Carcinoma,9_Het-ESC-H9_Cell_Line,15_Quies-HSC_&_B-cell-CD14_Primary_Cells,15_Quies-HSC_&_B-cell-CD15_Primary_Cells,9_Het-ESC-HUES64_Cell_Line,15_Quies-E…
chr10	63019451	63105517	pat_010	Loss	chr10	63097900	63098298	63097900	63098298	398	intergenic	RHOBTB1,TMEM26	Prabhakar_HAR583	HAR_Merge50-00219	15_Quies-ES-deriv-hESC_Derived_CD56+_Mesoderm_Cultured_Cells,15_Quies-Other-Pancreas,15_Quies-Digestive-Rectal_Mucosa.Donor_29,15_Quies-Sm._Muscle-Duodenum_Smooth_Muscle,15_Quies-Other-Spleen,15_Quies-Brain-Brain_Mid_Frontal_Lobe,15_Quies-Sm._Muscle-Rectal_Smooth_Muscle,15_Quies-ENCODE2012-HeLa-S3_Cervical_Carcinoma,15_Quies-HSC_&_B-cell-CD14_Primary_Cells,15_Quies-iPSC-iPS-20b_Cell_Line,15_Quies…
chr10	68901171	68959215	pat_010	Gain	chr10	68947956	68948176	68947956	68948176	220	intronic	CTNNA3	Bird_HAR520	HAR_Merge50-00221	9_Het-Epithelial-Penis_Foreskin_Fibroblast_Primary_Cells_skin02,15_Quies-ES-deriv-hESC_Derived_CD56+_Mesoderm_Cultured_Cells,15_Quies-Other-Pancreas,15_Quies-Digestive-Rectal_Mucosa.Donor_29,15_Quies-Sm._Muscle-Duodenum_Smooth_Muscle,15_Quies-Other-Spleen,15_Quies-Brain-Brain_Mid_Frontal_Lobe,15_Quies-Sm._Muscle-Rectal_Smooth_Muscle,15_Quies-ENCODE2012-HeLa-S3_Cervical_Carcinoma,15_Quies-iPSC-iPS…
chr10	69169409	69219472	pat_010	Gain	chr10	69216076	69216302	69216076	69216302	226	intronic	CTNNA3	Prabhakar_HAR942	HAR_Merge50-00222	15_Quies-ES-deriv-hESC_Derived_CD56+_Mesoderm_Cultured_Cells,14_ReprPCWk-ENCODE2012-Dnd41_TCell_Leukemia,15_Quies-Other-Pancreas,15_Quies-Digestive-Rectal_Mucosa.Donor_29,15_Quies-Sm._Muscle-Duodenum_Smooth_Muscle,14_ReprPCWk-ENCODE2012-A549_EtOH_0.02pct_Lung_Carcinoma,15_Quies-Other-Spleen,15_Quies-Brain-Brain_Mid_Frontal_Lobe,15_Quies-Sm._Muscle-Rectal_Smooth_Muscle,15_Quies-HSC_&_B-cell-CD14_P…
chr10	69994298	70064085	pat_010	Gain	chr10	70013312	70013568	70013312	70013568	256	intergenic	ATOH7,PBLD	Bird_HAR522	HAR_Merge50-00223	14_ReprPCWk-Neurosph-Neurosphere_Cultured_Cells_Ganglionic_Eminence_Derived,15_Quies-ES-deriv-hESC_Derived_CD56+_Mesoderm_Cultured_Cells,14_ReprPCWk-ENCODE2012-Dnd41_TCell_Leukemia,15_Quies-Other-Pancreas,15_Quies-Digestive-Rectal_Mucosa.Donor_29,13_ReprPC-IMR90-IMR90_Cell_Line,15_Quies-Sm._Muscle-Duodenum_Smooth_Muscle,15_Quies-Other-Spleen,15_Quies-Brain-Brain_Mid_Frontal_Lobe,14_ReprPCWk-Mesen…
chr10	73385633	73426287	pat_010	Gain	chr10	73409021	73409144	73409021	73409144	123	intronic	CDH23	Prabhakar_HAR224	HAR_Merge50-00224	14_ReprPCWk-Neurosph-Neurosphere_Cultured_Cells_Ganglionic_Eminence_Derived,15_Quies-ES-deriv-hESC_Derived_CD56+_Mesoderm_Cultured_Cells,14_ReprPCWk-ENCODE2012-Dnd41_TCell_Leukemia,2_TssAFlnk-ENCODE2012-K562_Leukemia,13_ReprPC-IMR90-IMR90_Cell_Line,15_Quies-Sm._Muscle-Duodenum_Smooth_Muscle,15_Quies-Brain-Brain_Mid_Frontal_Lobe,5_TxWk-Brain-Brain_Hippocampus_Middle,14_ReprPCWk-Mesench-Bone_Marrow…	ANAPC16,ASCC1
chr10	74035441	78744544	pat_135	Loss	chr10	75208690	75208798	75208690	75208798	108	intronic	PPP3CB	Bird_HAR524	HAR_Merge50-00225	5_TxWk-Digestive-Colonic_Mucosa,5_TxWk-Heart-Left_Ventricle,5_TxWk-Blood_&_T-cell-CD4+_CD25-_CD45RA+_Naive_Primary_Cells,4_Tx-iPSC-iPS-20b_Cell_Line,5_TxWk-ES-deriv-hESC_Derived_CD56+_Ectoderm_Cultured_Cells,5_TxWk-Epithelial-Penis_Foreskin_Fibroblast_Primary_Cells_skin02,5_TxWk-ENCODE2012-HepG2_Hepatocellular_Carcinoma,5_TxWk-Blood_&_T-cell-CD3_Primary_Cells_Cord_BI,5_TxWk-ENCODE2012-NH-A_Astroc…	PPP3CB,CHCHD1,KIAA0913,FUT11,BMS1P4,SEC24C
chr10	74035441	78744544	pat_135	Loss	chr10	77185788	77185984	77185788	77185984	196	intergenic	ZNF503-AS2,C10orf11	Bird_HAR525	HAR_Merge50-00226	14_ReprPCWk-Neurosph-Neurosphere_Cultured_Cells_Ganglionic_Eminence_Derived,14_ReprPCWk-Muscle-Fetal_Muscle_Trunk,14_ReprPCWk-HSC_&_B-cell-CD19_Primary_Cells_Peripheral_UW,14_ReprPCWk-ENCODE2012-Dnd41_TCell_Leukemia,5_TxWk-ENCODE2012-HepG2_Hepatocellular_Carcinoma,15_Quies-Sm._Muscle-Duodenum_Smooth_Muscle,15_Quies-Other-Spleen,15_Quies-Sm._Muscle-Rectal_Smooth_Muscle,15_Quies-ENCODE2012-HeLa-S3_…
chr10	74035441	78744544	pat_135	Loss	chr10	77438166	77438608	77438166	77438608	442	intergenic	ZNF503-AS2,C10orf11	Bird_HAR526,Prabhakar_HAR617	HAR_Merge50-00227	14_ReprPCWk-Neurosph-Neurosphere_Cultured_Cells_Ganglionic_Eminence_Derived,5_TxWk-Heart-Left_Ventricle,14_ReprPCWk-ENCODE2012-Dnd41_TCell_Leukemia,15_Quies-Digestive-Rectal_Mucosa.Donor_29,5_TxWk-ENCODE2012-HepG2_Hepatocellular_Carcinoma,14_ReprPCWk-ENCODE2012-A549_EtOH_0.02pct_Lung_Carcinoma,15_Quies-Other-Spleen,15_Quies-Brain-Brain_Mid_Frontal_Lobe,5_TxWk-HSC_&_B-cell-CD14_Primary_Cells,15_Qu…	ZNF503,NCRNA00245
chr10	74035441	78744544	pat_135	Loss	chr10	77483346	77484229	77483346	77484229	883	intergenic	ZNF503-AS2,C10orf11	Bird_HAR527	HAR_Merge50-00228	14_ReprPCWk-Neurosph-Neurosphere_Cultured_Cells_Ganglionic_Eminence_Derived,15_Quies-ES-deriv-hESC_Derived_CD56+_Mesoderm_Cultured_Cells,14_ReprPCWk-ENCODE2012-Dnd41_TCell_Leukemia,15_Quies-Digestive-Rectal_Mucosa.Donor_29,5_TxWk-ENCODE2012-HepG2_Hepatocellular_Carcinoma,15_Quies-Sm._Muscle-Duodenum_Smooth_Muscle,15_Quies-Other-Spleen,15_Quies-Brain-Brain_Mid_Frontal_Lobe,15_Quies-Sm._Muscle-Rect…
chr10	74035441	78744544	pat_135	Loss	chr10	77549472	77549614	77549472	77549614	142	intronic	C10orf11	Prabhakar_HAR804	HAR_Merge50-00229	7_Enh-Heart-Aorta,15_Quies-ES-deriv-hESC_Derived_CD56+_Mesoderm_Cultured_Cells,5_TxWk-Heart-Left_Ventricle,14_ReprPCWk-ENCODE2012-Dnd41_TCell_Leukemia,15_Quies-Digestive-Rectal_Mucosa.Donor_29,15_Quies-Sm._Muscle-Duodenum_Smooth_Muscle,15_Quies-Other-Spleen,15_Quies-Brain-Brain_Mid_Frontal_Lobe,15_Quies-Sm._Muscle-Rectal_Smooth_Muscle,15_Quies-ENCODE2012-HeLa-S3_Cervical_Carcinoma,15_Quies-HSC_&_…
chr10	74035441	78744544	pat_135	Loss	chr10	77781106	77781470	77781106	77781470	364	intronic	C10orf11	Bird_HAR177	HAR_Merge50-00230	14_ReprPCWk-Neurosph-Neurosphere_Cultured_Cells_Ganglionic_Eminence_Derived,15_Quies-ES-deriv-hESC_Derived_CD56+_Mesoderm_Cultured_Cells,14_ReprPCWk-Muscle-Fetal_Muscle_Trunk,15_Quies-Other-Pancreas,14_ReprPCWk-ENCODE2012-Dnd41_TCell_Leukemia,15_Quies-Digestive-Rectal_Mucosa.Donor_29,15_Quies-Sm._Muscle-Duodenum_Smooth_Muscle,15_Quies-Other-Spleen,15_Quies-Brain-Brain_Mid_Frontal_Lobe,15_Quies-Sm…
chr10	74035441	78744544	pat_135	Loss	chr10	77814087	77814528	77814087	77814528	441	intronic	C10orf11	Prabhakar_HAR670	HAR_Merge50-00231	15_Quies-ES-deriv-hESC_Derived_CD56+_Mesoderm_Cultured_Cells,14_ReprPCWk-Muscle-Fetal_Muscle_Trunk,8_ZNF/Rpts-ENCODE2012-Monocytes-CD14+_RO01746,15_Quies-Other-Pancreas,15_Quies-Digestive-Rectal_Mucosa.Donor_29,5_TxWk-ES-deriv-hESC_Derived_CD56+_Ectoderm_Cultured_Cells,5_TxWk-ENCODE2012-HepG2_Hepatocellular_Carcinoma,15_Quies-Sm._Muscle-Duodenum_Smooth_Muscle,15_Quies-Other-Spleen,15_Quies-Brain-…
chr10	77160547	77194302	pat_010	Loss	chr10	77185788	77185984	77185788	77185984	196	intergenic	ZNF503-AS2,C10orf11	Bird_HAR525	HAR_Merge50-00226	14_ReprPCWk-Neurosph-Neurosphere_Cultured_Cells_Ganglionic_Eminence_Derived,14_ReprPCWk-Muscle-Fetal_Muscle_Trunk,14_ReprPCWk-HSC_&_B-cell-CD19_Primary_Cells_Peripheral_UW,14_ReprPCWk-ENCODE2012-Dnd41_TCell_Leukemia,5_TxWk-ENCODE2012-HepG2_Hepatocellular_Carcinoma,15_Quies-Sm._Muscle-Duodenum_Smooth_Muscle,15_Quies-Other-Spleen,15_Quies-Sm._Muscle-Rectal_Smooth_Muscle,15_Quies-ENCODE2012-HeLa-S3_…
chr10	77422539	77438779	pat_010	Loss	chr10	77438166	77438608	77438166	77438608	442	intergenic	ZNF503-AS2,C10orf11	Bird_HAR526,Prabhakar_HAR617	HAR_Merge50-00227	14_ReprPCWk-Neurosph-Neurosphere_Cultured_Cells_Ganglionic_Eminence_Derived,5_TxWk-Heart-Left_Ventricle,14_ReprPCWk-ENCODE2012-Dnd41_TCell_Leukemia,15_Quies-Digestive-Rectal_Mucosa.Donor_29,5_TxWk-ENCODE2012-HepG2_Hepatocellular_Carcinoma,14_ReprPCWk-ENCODE2012-A549_EtOH_0.02pct_Lung_Carcinoma,15_Quies-Other-Spleen,15_Quies-Brain-Brain_Mid_Frontal_Lobe,5_TxWk-HSC_&_B-cell-CD14_Primary_Cells,15_Qu…	ZNF503,NCRNA00245
chr10	77469308	77486111	pat_010	Loss	chr10	77483346	77484229	77483346	77484229	883	intergenic	ZNF503-AS2,C10orf11	Bird_HAR527	HAR_Merge50-00228	14_ReprPCWk-Neurosph-Neurosphere_Cultured_Cells_Ganglionic_Eminence_Derived,15_Quies-ES-deriv-hESC_Derived_CD56+_Mesoderm_Cultured_Cells,14_ReprPCWk-ENCODE2012-Dnd41_TCell_Leukemia,15_Quies-Digestive-Rectal_Mucosa.Donor_29,5_TxWk-ENCODE2012-HepG2_Hepatocellular_Carcinoma,15_Quies-Sm._Muscle-Duodenum_Smooth_Muscle,15_Quies-Other-Spleen,15_Quies-Brain-Brain_Mid_Frontal_Lobe,15_Quies-Sm._Muscle-Rect…
chr10	77489935	77658915	pat_010	Gain	chr10	77549472	77549614	77549472	77549614	142	intronic	C10orf11	Prabhakar_HAR804	HAR_Merge50-00229	7_Enh-Heart-Aorta,15_Quies-ES-deriv-hESC_Derived_CD56+_Mesoderm_Cultured_Cells,5_TxWk-Heart-Left_Ventricle,14_ReprPCWk-ENCODE2012-Dnd41_TCell_Leukemia,15_Quies-Digestive-Rectal_Mucosa.Donor_29,15_Quies-Sm._Muscle-Duodenum_Smooth_Muscle,15_Quies-Other-Spleen,15_Quies-Brain-Brain_Mid_Frontal_Lobe,15_Quies-Sm._Muscle-Rectal_Smooth_Muscle,15_Quies-ENCODE2012-HeLa-S3_Cervical_Carcinoma,15_Quies-HSC_&_…
chr10	77759000	77801600	pat_010	Gain	chr10	77781106	77781470	77781106	77781470	364	intronic	C10orf11	Bird_HAR177	HAR_Merge50-00230	14_ReprPCWk-Neurosph-Neurosphere_Cultured_Cells_Ganglionic_Eminence_Derived,15_Quies-ES-deriv-hESC_Derived_CD56+_Mesoderm_Cultured_Cells,14_ReprPCWk-Muscle-Fetal_Muscle_Trunk,15_Quies-Other-Pancreas,14_ReprPCWk-ENCODE2012-Dnd41_TCell_Leukemia,15_Quies-Digestive-Rectal_Mucosa.Donor_29,15_Quies-Sm._Muscle-Duodenum_Smooth_Muscle,15_Quies-Other-Spleen,15_Quies-Brain-Brain_Mid_Frontal_Lobe,15_Quies-Sm…
chr10	77811893	77833675	pat_010	Gain	chr10	77814087	77814528	77814087	77814528	441	intronic	C10orf11	Prabhakar_HAR670	HAR_Merge50-00231	15_Quies-ES-deriv-hESC_Derived_CD56+_Mesoderm_Cultured_Cells,14_ReprPCWk-Muscle-Fetal_Muscle_Trunk,8_ZNF/Rpts-ENCODE2012-Monocytes-CD14+_RO01746,15_Quies-Other-Pancreas,15_Quies-Digestive-Rectal_Mucosa.Donor_29,5_TxWk-ES-deriv-hESC_Derived_CD56+_Ectoderm_Cultured_Cells,5_TxWk-ENCODE2012-HepG2_Hepatocellular_Carcinoma,15_Quies-Sm._Muscle-Duodenum_Smooth_Muscle,15_Quies-Other-Spleen,15_Quies-Brain-…
chr10	80296707	80412111	pat_010	Gain	chr10	80334147	80334450	80334147	80334450	303	intergenic	LINC00595,ZMIZ1-AS1	Prabhakar_HAR480	HAR_Merge50-00232	5_TxWk-Heart-Left_Ventricle,14_ReprPCWk-ENCODE2012-Dnd41_TCell_Leukemia,15_Quies-Digestive-Rectal_Mucosa.Donor_29,14_ReprPCWk-ENCODE2012-A549_EtOH_0.02pct_Lung_Carcinoma,15_Quies-Brain-Brain_Mid_Frontal_Lobe,15_Quies-Sm._Muscle-Rectal_Smooth_Muscle,14_ReprPCWk-Mesench-Bone_Marrow_Derived_Mesenchymal_Stem_Cell_Cultured_Cells,15_Quies-HSC_&_B-cell-CD14_Primary_Cells,5_TxWk-Other-Spleen,15_Quies-iPS…	RPS24,POLR3A
chr10	83942053	83962189	pat_136	Loss	chr10	83951776	83952132	83951776	83952132	356	intronic	NRG3	Prabhakar_HAR463	HAR_Merge50-00234	15_Quies-ES-deriv-hESC_Derived_CD56+_Mesoderm_Cultured_Cells,15_Quies-Other-Pancreas,15_Quies-Digestive-Rectal_Mucosa.Donor_29,15_Quies-Sm._Muscle-Duodenum_Smooth_Muscle,15_Quies-Other-Spleen,15_Quies-Brain-Brain_Mid_Frontal_Lobe,15_Quies-Sm._Muscle-Rectal_Smooth_Muscle,15_Quies-ENCODE2012-HeLa-S3_Cervical_Carcinoma,15_Quies-iPSC-iPS-20b_Cell_Line,15_Quies-HSC_&_B-cell-CD15_Primary_Cells,15_Quies…
chr10	83949776	83959140	pat_010	Gain	chr10	83951776	83952132	83951776	83952132	356	intronic	NRG3	Prabhakar_HAR463	HAR_Merge50-00234	15_Quies-ES-deriv-hESC_Derived_CD56+_Mesoderm_Cultured_Cells,15_Quies-Other-Pancreas,15_Quies-Digestive-Rectal_Mucosa.Donor_29,15_Quies-Sm._Muscle-Duodenum_Smooth_Muscle,15_Quies-Other-Spleen,15_Quies-Brain-Brain_Mid_Frontal_Lobe,15_Quies-Sm._Muscle-Rectal_Smooth_Muscle,15_Quies-ENCODE2012-HeLa-S3_Cervical_Carcinoma,15_Quies-iPSC-iPS-20b_Cell_Line,15_Quies-HSC_&_B-cell-CD15_Primary_Cells,15_Quies…
chr10	86412180	88502670	pat_137	Loss	chr10	87306056	87306283	87306056	87306283	227	intergenic	CCSER2,GRID1-AS1	Bird_HAR179	HAR_Merge50-00235	9_Het-Epithelial-Penis_Foreskin_Fibroblast_Primary_Cells_skin02,15_Quies-ES-deriv-hESC_Derived_CD56+_Mesoderm_Cultured_Cells,15_Quies-Other-Pancreas,14_ReprPCWk-ENCODE2012-Dnd41_TCell_Leukemia,15_Quies-Digestive-Rectal_Mucosa.Donor_29,15_Quies-Sm._Muscle-Duodenum_Smooth_Muscle,15_Quies-Other-Spleen,15_Quies-Brain-Brain_Mid_Frontal_Lobe,15_Quies-Sm._Muscle-Rectal_Smooth_Muscle,15_Quies-ENCODE2012-…
chr10	86412180	88502670	pat_137	Loss	chr10	87769069	87769278	87769069	87769278	209	intronic	GRID1	Prabhakar_HAR843	HAR_Merge50-00236	15_Quies-ES-deriv-hESC_Derived_CD56+_Mesoderm_Cultured_Cells,14_ReprPCWk-HSC_&_B-cell-CD19_Primary_Cells_Peripheral_UW,15_Quies-Other-Pancreas,15_Quies-Digestive-Rectal_Mucosa.Donor_29,15_Quies-Sm._Muscle-Duodenum_Smooth_Muscle,14_ReprPCWk-ENCODE2012-A549_EtOH_0.02pct_Lung_Carcinoma,15_Quies-Other-Spleen,5_TxWk-Brain-Brain_Hippocampus_Middle,15_Quies-Sm._Muscle-Rectal_Smooth_Muscle,15_Quies-ENCOD…
chr10	87756921	88093680	pat_013	Gain	chr10	87769069	87769278	87769069	87769278	209	intronic	GRID1	Prabhakar_HAR843	HAR_Merge50-00236	15_Quies-ES-deriv-hESC_Derived_CD56+_Mesoderm_Cultured_Cells,14_ReprPCWk-HSC_&_B-cell-CD19_Primary_Cells_Peripheral_UW,15_Quies-Other-Pancreas,15_Quies-Digestive-Rectal_Mucosa.Donor_29,15_Quies-Sm._Muscle-Duodenum_Smooth_Muscle,14_ReprPCWk-ENCODE2012-A549_EtOH_0.02pct_Lung_Carcinoma,15_Quies-Other-Spleen,5_TxWk-Brain-Brain_Hippocampus_Middle,15_Quies-Sm._Muscle-Rectal_Smooth_Muscle,15_Quies-ENCOD…
chr10	87762718	88132082	pat_009	Gain	chr10	87769069	87769278	87769069	87769278	209	intronic	GRID1	Prabhakar_HAR843	HAR_Merge50-00236	15_Quies-ES-deriv-hESC_Derived_CD56+_Mesoderm_Cultured_Cells,14_ReprPCWk-HSC_&_B-cell-CD19_Primary_Cells_Peripheral_UW,15_Quies-Other-Pancreas,15_Quies-Digestive-Rectal_Mucosa.Donor_29,15_Quies-Sm._Muscle-Duodenum_Smooth_Muscle,14_ReprPCWk-ENCODE2012-A549_EtOH_0.02pct_Lung_Carcinoma,15_Quies-Other-Spleen,5_TxWk-Brain-Brain_Hippocampus_Middle,15_Quies-Sm._Muscle-Rectal_Smooth_Muscle,15_Quies-ENCOD…
chr10	87768409	87818028	pat_010	Gain	chr10	87769069	87769278	87769069	87769278	209	intronic	GRID1	Prabhakar_HAR843	HAR_Merge50-00236	15_Quies-ES-deriv-hESC_Derived_CD56+_Mesoderm_Cultured_Cells,14_ReprPCWk-HSC_&_B-cell-CD19_Primary_Cells_Peripheral_UW,15_Quies-Other-Pancreas,15_Quies-Digestive-Rectal_Mucosa.Donor_29,15_Quies-Sm._Muscle-Duodenum_Smooth_Muscle,14_ReprPCWk-ENCODE2012-A549_EtOH_0.02pct_Lung_Carcinoma,15_Quies-Other-Spleen,5_TxWk-Brain-Brain_Hippocampus_Middle,15_Quies-Sm._Muscle-Rectal_Smooth_Muscle,15_Quies-ENCOD…
chr10	92380128	92410092	pat_010	Gain	chr10	92401913	92402099	92401913	92402099	186	intergenic	LINC00865,HTR7	Bird_HAR529	HAR_Merge50-00237	15_Quies-ES-deriv-hESC_Derived_CD56+_Mesoderm_Cultured_Cells,15_Quies-Other-Pancreas,14_ReprPCWk-ENCODE2012-Dnd41_TCell_Leukemia,15_Quies-Digestive-Rectal_Mucosa.Donor_29,15_Quies-Other-Spleen,5_TxWk-ENCODE2012-NH-A_Astrocytes,15_Quies-Brain-Brain_Mid_Frontal_Lobe,15_Quies-Sm._Muscle-Rectal_Smooth_Muscle,15_Quies-HSC_&_B-cell-CD14_Primary_Cells,15_Quies-iPSC-iPS-20b_Cell_Line,15_Quies-HSC_&_B-cel…
chr10	95081825	95146149	pat_010	Gain	chr10	95102739	95102959	95102739	95102959	220	intronic	MYOF	Prabhakar_HAR953	HAR_Merge50-00239	4_Tx-Muscle-Fetal_Muscle_Leg,4_Tx-Other-Placenta_Amnion,15_Quies-Brain-Brain_Mid_Frontal_Lobe,15_Quies-iPSC-iPS-20b_Cell_Line,5_TxWk-Other-Spleen,4_Tx-ENCODE2012-Osteoblasts,15_Quies-HSC_&_B-cell-CD15_Primary_Cells,4_Tx-Digestive-Colonic_Mucosa,5_TxWk-ESC-4star,5_TxWk-Brain-Brain_Substantia_Nigra,4_Tx-Epithelial-Breast_Myoepithelial_Cells,5_TxWk-ESC-HUES6_Cell_Line,15_Quies-Blood_&_T-cell-CD4_Mem…	CEP55
chr10	97898117	97970971	pat_010	Gain	chr10	97948774	97949551	97948774	97949551	777	intergenic	ZNF518A,BLNK	Bird_HAR530	HAR_Merge50-00240	15_Quies-ES-deriv-hESC_Derived_CD56+_Mesoderm_Cultured_Cells,15_Quies-Sm._Muscle-Duodenum_Smooth_Muscle,15_Quies-Other-Spleen,15_Quies-Brain-Brain_Mid_Frontal_Lobe,15_Quies-Sm._Muscle-Rectal_Smooth_Muscle,15_Quies-ENCODE2012-HeLa-S3_Cervical_Carcinoma,15_Quies-HSC_&_B-cell-CD14_Primary_Cells,5_TxWk-Other-Spleen,15_Quies-iPSC-iPS-20b_Cell_Line,15_Quies-HSC_&_B-cell-CD15_Primary_Cells,8_ZNF/Rpts-HS…	ZNF518A
chr10	107065240	107109854	pat_010	Loss	chr10	107100364	107100665	107100364	107100665	301	intergenic	SORCS3,SORCS1	Prabhakar_HAR59,Toh_HAR530	HAR_Merge50-00248	15_Quies-ES-deriv-hESC_Derived_CD56+_Mesoderm_Cultured_Cells,15_Quies-Other-Pancreas,15_Quies-Digestive-Rectal_Mucosa.Donor_29,15_Quies-Sm._Muscle-Duodenum_Smooth_Muscle,15_Quies-Other-Spleen,15_Quies-Brain-Brain_Mid_Frontal_Lobe,15_Quies-Sm._Muscle-Rectal_Smooth_Muscle,15_Quies-ENCODE2012-HeLa-S3_Cervical_Carcinoma,15_Quies-HSC_&_B-cell-CD14_Primary_Cells,15_Quies-iPSC-iPS-20b_Cell_Line,15_Quies…
chr10	108521632	108528826	pat_138	Loss	chr10	108527757	108528056	108527757	108528056	299	intronic	SORCS1	Prabhakar_HAR849	HAR_Merge50-00249	15_Quies-ES-deriv-hESC_Derived_CD56+_Mesoderm_Cultured_Cells,15_Quies-Other-Pancreas,15_Quies-Digestive-Rectal_Mucosa.Donor_29,5_TxWk-ES-deriv-hESC_Derived_CD56+_Ectoderm_Cultured_Cells,15_Quies-Sm._Muscle-Duodenum_Smooth_Muscle,15_Quies-Other-Spleen,15_Quies-Brain-Brain_Mid_Frontal_Lobe,15_Quies-Sm._Muscle-Rectal_Smooth_Muscle,15_Quies-ENCODE2012-HeLa-S3_Cervical_Carcinoma,15_Quies-HSC_&_B-cell-…
chr10	108782943	108809827	pat_010	Gain	chr10	108809368	108809595	108809368	108809595	227	intronic	SORCS1	Prabhakar_HAR5,Bird_HAR133,Toh_HAR55	HAR_Merge50-00250	15_Quies-ES-deriv-hESC_Derived_CD56+_Mesoderm_Cultured_Cells,15_Quies-Other-Pancreas,15_Quies-Digestive-Rectal_Mucosa.Donor_29,15_Quies-Sm._Muscle-Duodenum_Smooth_Muscle,15_Quies-Other-Spleen,15_Quies-Brain-Brain_Mid_Frontal_Lobe,15_Quies-Sm._Muscle-Rectal_Smooth_Muscle,15_Quies-ENCODE2012-HeLa-S3_Cervical_Carcinoma,15_Quies-HSC_&_B-cell-CD14_Primary_Cells,15_Quies-iPSC-iPS-20b_Cell_Line,15_Quies…
chr10	110303298	135372601	pat_139	Gain	chr10	113172816	113172829	113172816	113172829	13	intergenic	ADRA2A,GPAM	Toh_HAR134	HAR_Merge50-00251	15_Quies-ES-deriv-hESC_Derived_CD56+_Mesoderm_Cultured_Cells,15_Quies-Other-Pancreas,15_Quies-Digestive-Rectal_Mucosa.Donor_29,15_Quies-Sm._Muscle-Duodenum_Smooth_Muscle,15_Quies-Other-Spleen,15_Quies-Brain-Brain_Mid_Frontal_Lobe,15_Quies-Sm._Muscle-Rectal_Smooth_Muscle,15_Quies-ENCODE2012-HeLa-S3_Cervical_Carcinoma,15_Quies-HSC_&_B-cell-CD14_Primary_Cells,15_Quies-iPSC-iPS-20b_Cell_Line,15_Quies…
chr10	110303298	135372601	pat_139	Gain	chr10	114345694	114346003	114345694	114346003	309	intronic	VTI1A	Bird_HAR171	HAR_Merge50-00252	5_TxWk-HSC_&_B-cell-CD19_Primary_Cells_Peripheral_UW,15_Quies-Other-Pancreas,15_Quies-Digestive-Rectal_Mucosa.Donor_29,5_TxWk-ES-deriv-hESC_Derived_CD56+_Ectoderm_Cultured_Cells,5_TxWk-Blood_&_T-cell-CD3_Primary_Cells_Cord_BI,15_Quies-Sm._Muscle-Duodenum_Smooth_Muscle,5_TxWk-ENCODE2012-NH-A_Astrocytes,15_Quies-Brain-Brain_Mid_Frontal_Lobe,5_TxWk-HSC_&_B-cell-CD14_Primary_Cells,15_Quies-ENCODE2012…
chr10	110303298	135372601	pat_139	Gain	chr10	115059144	115059319	115059144	115059319	175	intergenic	TCF7L2,HABP2	Bird_HAR502	HAR_Merge50-00253	15_Quies-Other-Pancreas,15_Quies-Digestive-Rectal_Mucosa.Donor_29,5_TxWk-ES-deriv-hESC_Derived_CD56+_Ectoderm_Cultured_Cells,15_Quies-Sm._Muscle-Duodenum_Smooth_Muscle,15_Quies-Other-Spleen,5_TxWk-ENCODE2012-NH-A_Astrocytes,15_Quies-Brain-Brain_Mid_Frontal_Lobe,15_Quies-Sm._Muscle-Rectal_Smooth_Muscle,15_Quies-ENCODE2012-HeLa-S3_Cervical_Carcinoma,15_Quies-HSC_&_B-cell-CD14_Primary_Cells,14_ReprP…
chr10	110303298	135372601	pat_139	Gain	chr10	115312248	115312312	115312248	115312312	64	intronic	HABP2	Prabhakar_HAR31	HAR_Merge50-00254	14_ReprPCWk-Neurosph-Neurosphere_Cultured_Cells_Ganglionic_Eminence_Derived,13_ReprPC-iPSC-iPS_DF_6.9_Cell_Line,14_ReprPCWk-ENCODE2012-Dnd41_TCell_Leukemia,15_Quies-Sm._Muscle-Duodenum_Smooth_Muscle,15_Quies-Other-Spleen,15_Quies-Brain-Brain_Mid_Frontal_Lobe,14_ReprPCWk-Mesench-Bone_Marrow_Derived_Mesenchymal_Stem_Cell_Cultured_Cells,15_Quies-Sm._Muscle-Rectal_Smooth_Muscle,7_Enh-Digestive-Stomac…
chr10	110303298	135372601	pat_139	Gain	chr10	116466652	116466669	116466652	116466669	17	intergenic	ABLIM1,FAM160B1	Toh_HAR206	HAR_Merge50-00255	15_Quies-ES-deriv-hESC_Derived_CD56+_Mesoderm_Cultured_Cells,5_TxWk-Heart-Left_Ventricle,14_ReprPCWk-HSC_&_B-cell-CD19_Primary_Cells_Peripheral_UW,14_ReprPCWk-ENCODE2012-Dnd41_TCell_Leukemia,15_Quies-Other-Pancreas,15_Quies-Digestive-Rectal_Mucosa.Donor_29,15_Quies-Sm._Muscle-Duodenum_Smooth_Muscle,15_Quies-Other-Spleen,5_TxWk-Brain-Brain_Hippocampus_Middle,15_Quies-Sm._Muscle-Rectal_Smooth_Muscl…
chr10	110303298	135372601	pat_139	Gain	chr10	117636353	117636594	117636353	117636594	241	intronic	ATRNL1	Bird_HAR503	HAR_Merge50-00256	15_Quies-ES-deriv-hESC_Derived_CD56+_Mesoderm_Cultured_Cells,15_Quies-Digestive-Rectal_Mucosa.Donor_29,15_Quies-Sm._Muscle-Duodenum_Smooth_Muscle,15_Quies-Other-Spleen,15_Quies-Brain-Brain_Mid_Frontal_Lobe,15_Quies-Sm._Muscle-Rectal_Smooth_Muscle,15_Quies-ENCODE2012-HeLa-S3_Cervical_Carcinoma,15_Quies-HSC_&_B-cell-CD14_Primary_Cells,15_Quies-iPSC-iPS-20b_Cell_Line,15_Quies-HSC_&_B-cell-CD15_Prima…
chr10	110303298	135372601	pat_139	Gain	chr10	117775221	117775327	117775221	117775327	106	intergenic	ATRNL1,GFRA1	Prabhakar_HAR558	HAR_Merge50-00257	15_Quies-ES-deriv-hESC_Derived_CD56+_Mesoderm_Cultured_Cells,15_Quies-Other-Pancreas,15_Quies-Digestive-Rectal_Mucosa.Donor_29,15_Quies-Sm._Muscle-Duodenum_Smooth_Muscle,15_Quies-Other-Spleen,9_Het-Digestive-Sigmoid_Colon,15_Quies-Brain-Brain_Mid_Frontal_Lobe,15_Quies-Sm._Muscle-Rectal_Smooth_Muscle,15_Quies-ENCODE2012-HeLa-S3_Cervical_Carcinoma,15_Quies-HSC_&_B-cell-CD14_Primary_Cells,14_ReprPCW…
chr10	110303298	135372601	pat_139	Gain	chr10	119507602	119507821	119507602	119507821	219	intergenic	EMX2,RAB11FIP2	Bird_HAR172,Prabhakar_HAR278	HAR_Merge50-00258	14_ReprPCWk-Neurosph-Neurosphere_Cultured_Cells_Ganglionic_Eminence_Derived,15_Quies-ES-deriv-hESC_Derived_CD56+_Mesoderm_Cultured_Cells,14_ReprPCWk-Muscle-Fetal_Muscle_Trunk,14_ReprPCWk-Digestive-Colonic_Mucosa,14_ReprPCWk-ENCODE2012-Dnd41_TCell_Leukemia,15_Quies-Other-Pancreas,15_Quies-Sm._Muscle-Duodenum_Smooth_Muscle,15_Quies-Other-Spleen,14_ReprPCWk-ENCODE2012-A549_EtOH_0.02pct_Lung_Carcinom…
chr10	110303298	135372601	pat_139	Gain	chr10	119803249	119803548	119803249	119803548	299	intronic	RAB11FIP2	Bird_HAR504	HAR_Merge50-00259	5_TxWk-HSC_&_B-cell-CD19_Primary_Cells_Peripheral_UW,5_TxWk-Heart-Left_Ventricle,7_Enh-HSC_&_B-cell-CD15_Primary_Cells,5_TxWk-ES-deriv-hESC_Derived_CD56+_Ectoderm_Cultured_Cells,5_TxWk-Epithelial-Penis_Foreskin_Fibroblast_Primary_Cells_skin02,5_TxWk-ENCODE2012-HepG2_Hepatocellular_Carcinoma,15_Quies-Other-Spleen,5_TxWk-ENCODE2012-NH-A_Astrocytes,5_TxWk-HSC_&_B-cell-CD14_Primary_Cells,5_TxWk-Epith…	RAB11FIP2
chr10	110303298	135372601	pat_139	Gain	chr10	120137707	120138104	120137707	120138104	397	intergenic	FAM204A,PRLHR	Prabhakar_HAR337,BUSH_HAR47	HAR_Merge50-00260	14_ReprPCWk-Neurosph-Neurosphere_Cultured_Cells_Ganglionic_Eminence_Derived,15_Quies-ES-deriv-hESC_Derived_CD56+_Mesoderm_Cultured_Cells,14_ReprPCWk-HSC_&_B-cell-CD19_Primary_Cells_Peripheral_UW,14_ReprPCWk-ENCODE2012-Dnd41_TCell_Leukemia,15_Quies-Other-Pancreas,14_ReprPCWk-ENCODE2012-A549_EtOH_0.02pct_Lung_Carcinoma,15_Quies-Other-Spleen,15_Quies-Brain-Brain_Mid_Frontal_Lobe,14_ReprPCWk-Mesench-…
chr10	110303298	135372601	pat_139	Gain	chr10	120175321	120175525	120175321	120175525	204	intergenic	FAM204A,PRLHR	Bird_HAR505	HAR_Merge50-00261	14_ReprPCWk-Neurosph-Neurosphere_Cultured_Cells_Ganglionic_Eminence_Derived,14_ReprPCWk-HSC_&_B-cell-CD19_Primary_Cells_Peripheral_UW,15_Quies-Other-Pancreas,15_Quies-Other-Spleen,15_Quies-Brain-Brain_Mid_Frontal_Lobe,15_Quies-Sm._Muscle-Rectal_Smooth_Muscle,14_ReprPCWk-Heart-Left_Ventricle,15_Quies-iPSC-iPS-20b_Cell_Line,14_ReprPCWk-HSC_&_B-cell-CD14_Primary_Cells,14_ReprPCWk-Digestive-Sigmoid_C…
chr10	110303298	135372601	pat_139	Gain	chr10	122169782	122170099	122169782	122170099	317	intergenic	MIR4682,PPAPDC1A	Prabhakar_HAR289	HAR_Merge50-00262	9_Het-Epithelial-Penis_Foreskin_Fibroblast_Primary_Cells_skin02,15_Quies-ES-deriv-hESC_Derived_CD56+_Mesoderm_Cultured_Cells,15_Quies-Other-Pancreas,14_ReprPCWk-ENCODE2012-Dnd41_TCell_Leukemia,15_Quies-Digestive-Rectal_Mucosa.Donor_29,15_Quies-Sm._Muscle-Duodenum_Smooth_Muscle,15_Quies-Other-Spleen,15_Quies-Sm._Muscle-Rectal_Smooth_Muscle,15_Quies-ENCODE2012-HeLa-S3_Cervical_Carcinoma,15_Quies-HS…
chr10	110303298	135372601	pat_139	Gain	chr10	122945673	122946002	122945673	122946002	329	intergenic	MIR5694,FGFR2	Bird_HAR78,Toh_HAR228	HAR_Merge50-00263	9_Het-Epithelial-Penis_Foreskin_Fibroblast_Primary_Cells_skin02,15_Quies-ES-deriv-hESC_Derived_CD56+_Mesoderm_Cultured_Cells,14_ReprPCWk-Muscle-Fetal_Muscle_Trunk,15_Quies-Other-Pancreas,15_Quies-Digestive-Rectal_Mucosa.Donor_29,15_Quies-Sm._Muscle-Duodenum_Smooth_Muscle,14_ReprPCWk-ENCODE2012-A549_EtOH_0.02pct_Lung_Carcinoma,15_Quies-Other-Spleen,15_Quies-Sm._Muscle-Rectal_Smooth_Muscle,15_Quies…
chr10	110303298	135372601	pat_139	Gain	chr10	122948084	122948306	122948084	122948306	222	intergenic	MIR5694,FGFR2	Prabhakar_HAR212	HAR_Merge50-00264	9_Het-Epithelial-Penis_Foreskin_Fibroblast_Primary_Cells_skin02,15_Quies-ES-deriv-hESC_Derived_CD56+_Mesoderm_Cultured_Cells,14_ReprPCWk-Muscle-Fetal_Muscle_Trunk,14_ReprPCWk-ENCODE2012-Dnd41_TCell_Leukemia,15_Quies-Other-Pancreas,15_Quies-Digestive-Rectal_Mucosa.Donor_29,15_Quies-Sm._Muscle-Duodenum_Smooth_Muscle,14_ReprPCWk-ENCODE2012-A549_EtOH_0.02pct_Lung_Carcinoma,15_Quies-Other-Spleen,15_Qu…
chr10	110303298	135372601	pat_139	Gain	chr10	125156057	125156397	125156057	125156397	340	intergenic	BUB3,GPR26	Bird_HAR506	HAR_Merge50-00265	9_Het-Epithelial-Penis_Foreskin_Fibroblast_Primary_Cells_skin02,15_Quies-ES-deriv-hESC_Derived_CD56+_Mesoderm_Cultured_Cells,5_TxWk-Digestive-Colonic_Mucosa,14_ReprPCWk-Muscle-Fetal_Muscle_Trunk,15_Quies-Other-Pancreas,15_Quies-Digestive-Rectal_Mucosa.Donor_29,9_Het-ENCODE2012-NHLF_Lung_Fibroblasts,15_Quies-Sm._Muscle-Duodenum_Smooth_Muscle,15_Quies-Other-Spleen,15_Quies-Brain-Brain_Mid_Frontal_L…
chr10	110303298	135372601	pat_139	Gain	chr10	125273687	125273865	125273687	125273865	178	intergenic	BUB3,GPR26	Toh_HAR419,Bird_HAR507	HAR_Merge50-00266	9_Het-Epithelial-Penis_Foreskin_Fibroblast_Primary_Cells_skin02,9_Het-Other-Ovary,15_Quies-Other-Pancreas,14_ReprPCWk-ENCODE2012-Dnd41_TCell_Leukemia,15_Quies-Digestive-Rectal_Mucosa.Donor_29,15_Quies-Sm._Muscle-Duodenum_Smooth_Muscle,15_Quies-Other-Spleen,14_ReprPCWk-ENCODE2012-A549_EtOH_0.02pct_Lung_Carcinoma,15_Quies-Sm._Muscle-Rectal_Smooth_Muscle,15_Quies-iPSC-iPS-20b_Cell_Line,14_ReprPCWk-H…
chr10	110303298	135372601	pat_139	Gain	chr10	126812857	126812879	126812857	126812879	22	intronic	CTBP2	Toh_HAR332	HAR_Merge50-00267	7_Enh-Heart-Aorta,5_TxWk-ES-deriv-hESC_Derived_CD56+_Ectoderm_Cultured_Cells,2_TssAFlnk-Sm._Muscle-Rectal_Smooth_Muscle,7_Enh-Digestive-Esophagus,2_TssAFlnk-Epithelial-Penis_Foreskin_Fibroblast_Primary_Cells_skin01,6_EnhG-Digestive-Fetal_Stomach,2_TssAFlnk-Sm._Muscle-Stomach_Smooth_Muscle,6_EnhG-ES-deriv-H9_Derived_Neuron_Cultured_Cells,7_Enh-Digestive-Stomach_Mucosa,5_TxWk-Other-Spleen,7_Enh-ENC…
chr10	110303298	135372601	pat_139	Gain	chr10	127190086	127190424	127190086	127190424	338	intergenic	CTBP2,LOC100169752	BUSH_HAR20	HAR_Merge50-00268	15_Quies-ES-deriv-hESC_Derived_CD56+_Mesoderm_Cultured_Cells,14_ReprPCWk-Muscle-Fetal_Muscle_Trunk,14_ReprPCWk-ENCODE2012-Dnd41_TCell_Leukemia,15_Quies-Other-Pancreas,15_Quies-Digestive-Rectal_Mucosa.Donor_29,15_Quies-Sm._Muscle-Duodenum_Smooth_Muscle,15_Quies-Other-Spleen,15_Quies-Brain-Brain_Mid_Frontal_Lobe,15_Quies-Sm._Muscle-Rectal_Smooth_Muscle,14_ReprPCWk-Mesench-Bone_Marrow_Derived_Mesenc…
chr10	110303298	135372601	pat_139	Gain	chr10	130774152	130774364	130774152	130774364	212	intergenic	MKI67,MGMT	Prabhakar_HAR850	HAR_Merge50-00269	9_Het-Epithelial-Penis_Foreskin_Fibroblast_Primary_Cells_skin02,14_ReprPCWk-Neurosph-Neurosphere_Cultured_Cells_Ganglionic_Eminence_Derived,15_Quies-ES-deriv-hESC_Derived_CD56+_Mesoderm_Cultured_Cells,14_ReprPCWk-Muscle-Fetal_Muscle_Trunk,15_Quies-Other-Pancreas,15_Quies-Digestive-Rectal_Mucosa.Donor_29,15_Quies-Sm._Muscle-Duodenum_Smooth_Muscle,15_Quies-Other-Spleen,15_Quies-Sm._Muscle-Rectal_Sm…
chr10	110303298	135372601	pat_139	Gain	chr10	130844170	130844395	130844170	130844395	225	intergenic	MKI67,MGMT	Toh_HAR532,Bird_HAR173,Pollard_HAR56	HAR_Merge50-00270	9_Het-Epithelial-Penis_Foreskin_Fibroblast_Primary_Cells_skin02,14_ReprPCWk-Neurosph-Neurosphere_Cultured_Cells_Ganglionic_Eminence_Derived,15_Quies-ES-deriv-hESC_Derived_CD56+_Mesoderm_Cultured_Cells,1_TssA-ENCODE2012-Osteoblasts,14_ReprPCWk-Digestive-Colonic_Mucosa,15_Quies-Other-Pancreas,2_TssAFlnk-Adipose-Adipose_Nuclei,11_BivFlnk-Muscle-Skeletal_Muscle_Female,14_ReprPCWk-ENCODE2012-A549_EtOH…	AK124226,MGMT
chr10	110303298	135372601	pat_139	Gain	chr10	130970067	130970425	130970067	130970425	358	intergenic	MKI67,MGMT	Bird_HAR57,Prabhakar_HAR8	HAR_Merge50-00271	15_Quies-ES-deriv-hESC_Derived_CD56+_Mesoderm_Cultured_Cells,15_Quies-Other-Pancreas,15_Quies-Sm._Muscle-Duodenum_Smooth_Muscle,15_Quies-Other-Spleen,14_ReprPCWk-Mesench-Bone_Marrow_Derived_Mesenchymal_Stem_Cell_Cultured_Cells,15_Quies-Sm._Muscle-Rectal_Smooth_Muscle,15_Quies-HSC_&_B-cell-CD14_Primary_Cells,15_Quies-iPSC-iPS-20b_Cell_Line,15_Quies-HSC_&_B-cell-CD15_Primary_Cells,15_Quies-ESC-ES-W…
chr10	110303298	135372601	pat_139	Gain	chr10	130982058	130982281	130982058	130982281	223	intergenic	MKI67,MGMT	Bird_HAR508	HAR_Merge50-00272	9_Het-Epithelial-Penis_Foreskin_Fibroblast_Primary_Cells_skin02,15_Quies-ES-deriv-hESC_Derived_CD56+_Mesoderm_Cultured_Cells,15_Quies-Other-Pancreas,15_Quies-Sm._Muscle-Duodenum_Smooth_Muscle,15_Quies-Other-Spleen,14_ReprPCWk-Mesench-Bone_Marrow_Derived_Mesenchymal_Stem_Cell_Cultured_Cells,15_Quies-Sm._Muscle-Rectal_Smooth_Muscle,15_Quies-HSC_&_B-cell-CD14_Primary_Cells,15_Quies-iPSC-iPS-20b_Cell…
chr10	110303298	135372601	pat_139	Gain	chr10	131129432	131129500	131129432	131129500	68	intergenic	MKI67,MGMT	Toh_HAR400	HAR_Merge50-00273	9_Het-Epithelial-Penis_Foreskin_Fibroblast_Primary_Cells_skin02,14_ReprPCWk-Neurosph-Neurosphere_Cultured_Cells_Ganglionic_Eminence_Derived,15_Quies-ES-deriv-hESC_Derived_CD56+_Mesoderm_Cultured_Cells,14_ReprPCWk-Muscle-Fetal_Muscle_Trunk,15_Quies-Other-Pancreas,15_Quies-Digestive-Rectal_Mucosa.Donor_29,15_Quies-Other-Spleen,15_Quies-Sm._Muscle-Rectal_Smooth_Muscle,14_ReprPCWk-Heart-Left_Ventricl…
chr10	110303298	135372601	pat_139	Gain	chr10	131232877	131233072	131232877	131233072	195	intergenic	MKI67,MGMT	Prabhakar_HAR271,Bird_HAR509	HAR_Merge50-00274	9_Het-Epithelial-Penis_Foreskin_Fibroblast_Primary_Cells_skin02,14_ReprPCWk-Neurosph-Neurosphere_Cultured_Cells_Ganglionic_Eminence_Derived,14_ReprPCWk-Muscle-Fetal_Muscle_Trunk,15_Quies-Other-Pancreas,15_Quies-Digestive-Rectal_Mucosa.Donor_29,15_Quies-Sm._Muscle-Duodenum_Smooth_Muscle,15_Quies-Other-Spleen,15_Quies-Brain-Brain_Mid_Frontal_Lobe,15_Quies-Sm._Muscle-Rectal_Smooth_Muscle,15_Quies-HS…
chr10	110303298	135372601	pat_139	Gain	chr10	131560944	131561518	131560944	131561518	574	intronic	MGMT	Bird_HAR510	HAR_Merge50-00275	5_TxWk-HSC_&_B-cell-CD19_Primary_Cells_Peripheral_UW,15_Quies-ES-deriv-hESC_Derived_CD56+_Mesoderm_Cultured_Cells,5_TxWk-Digestive-Colonic_Mucosa,14_ReprPCWk-Muscle-Fetal_Muscle_Trunk,5_TxWk-Heart-Left_Ventricle,5_TxWk-Blood_&_T-cell-CD4+_CD25-_CD45RA+_Naive_Primary_Cells,9_Het-ENCODE2012-NHLF_Lung_Fibroblasts,5_TxWk-Epithelial-Penis_Foreskin_Fibroblast_Primary_Cells_skin02,5_TxWk-Blood_&_T-cell-…
chr10	110303298	135372601	pat_139	Gain	chr10	131754168	131754688	131754168	131754688	520	intronic	EBF3	Bird_HAR511	HAR_Merge50-00276	12_EnhBiv-ES-deriv-hESC_Derived_CD56+_Ectoderm_Cultured_Cells,12_EnhBiv-ESC-4star,13_ReprPC-iPSC-iPS_DF_6.9_Cell_Line,10_TssBiv-Muscle-Skeletal_Muscle_Female,14_ReprPCWk-Digestive-Colonic_Mucosa,14_ReprPCWk-HSC_&_B-cell-CD19_Primary_Cells_Peripheral_UW,15_Quies-Other-Pancreas,12_EnhBiv-ESC-HUES48_Cell_Line,13_ReprPC-Digestive-Rectal_Mucosa.Donor_29,13_ReprPC-HSC_&_B-cell-CD14_Primary_Cells,2_TssA…
chr10	110303298	135372601	pat_139	Gain	chr10	133355893	133355955	133355893	133355955	62	intergenic	TCERG1L,FLJ46300	Toh_HAR340	HAR_Merge50-00277	9_Het-Epithelial-Penis_Foreskin_Fibroblast_Primary_Cells_skin02,15_Quies-ES-deriv-hESC_Derived_CD56+_Mesoderm_Cultured_Cells,14_ReprPCWk-Muscle-Fetal_Muscle_Trunk,14_ReprPCWk-ENCODE2012-Dnd41_TCell_Leukemia,15_Quies-Other-Pancreas,15_Quies-Digestive-Rectal_Mucosa.Donor_29,14_ReprPCWk-ENCODE2012-A549_EtOH_0.02pct_Lung_Carcinoma,15_Quies-Other-Spleen,15_Quies-Sm._Muscle-Rectal_Smooth_Muscle,15_Quie…
chr10	110303298	135372601	pat_139	Gain	chr10	134471350	134472057	134471350	134472057	707	intronic	INPP5A	Prabhakar_HAR475	HAR_Merge50-00278	5_TxWk-HSC_&_B-cell-CD19_Primary_Cells_Peripheral_UW,4_Tx-Muscle-Fetal_Muscle_Leg,5_TxWk-Digestive-Colonic_Mucosa,5_TxWk-Heart-Left_Ventricle,5_TxWk-Blood_&_T-cell-CD4+_CD25-_CD45RA+_Naive_Primary_Cells,7_Enh-Other-Adult_Liver,5_TxWk-ENCODE2012-NH-A_Astrocytes,5_TxWk-Brain-Brain_Hippocampus_Middle,5_TxWk-HSC_&_B-cell-CD14_Primary_Cells,15_Quies-ENCODE2012-HeLa-S3_Cervical_Carcinoma,15_Quies-iPSC-…
chr10	113170079	113181217	pat_010	Gain	chr10	113172816	113172829	113172816	113172829	13	intergenic	ADRA2A,GPAM	Toh_HAR134	HAR_Merge50-00251	15_Quies-ES-deriv-hESC_Derived_CD56+_Mesoderm_Cultured_Cells,15_Quies-Other-Pancreas,15_Quies-Digestive-Rectal_Mucosa.Donor_29,15_Quies-Sm._Muscle-Duodenum_Smooth_Muscle,15_Quies-Other-Spleen,15_Quies-Brain-Brain_Mid_Frontal_Lobe,15_Quies-Sm._Muscle-Rectal_Smooth_Muscle,15_Quies-ENCODE2012-HeLa-S3_Cervical_Carcinoma,15_Quies-HSC_&_B-cell-CD14_Primary_Cells,15_Quies-iPSC-iPS-20b_Cell_Line,15_Quies…
chr10	115295585	115342365	pat_010	Gain	chr10	115312248	115312312	115312248	115312312	64	intronic	HABP2	Prabhakar_HAR31	HAR_Merge50-00254	14_ReprPCWk-Neurosph-Neurosphere_Cultured_Cells_Ganglionic_Eminence_Derived,13_ReprPC-iPSC-iPS_DF_6.9_Cell_Line,14_ReprPCWk-ENCODE2012-Dnd41_TCell_Leukemia,15_Quies-Sm._Muscle-Duodenum_Smooth_Muscle,15_Quies-Other-Spleen,15_Quies-Brain-Brain_Mid_Frontal_Lobe,14_ReprPCWk-Mesench-Bone_Marrow_Derived_Mesenchymal_Stem_Cell_Cultured_Cells,15_Quies-Sm._Muscle-Rectal_Smooth_Muscle,7_Enh-Digestive-Stomac…
chr10	116411927	116519134	pat_010	Gain	chr10	116466652	116466669	116466652	116466669	17	intergenic	ABLIM1,FAM160B1	Toh_HAR206	HAR_Merge50-00255	15_Quies-ES-deriv-hESC_Derived_CD56+_Mesoderm_Cultured_Cells,5_TxWk-Heart-Left_Ventricle,14_ReprPCWk-HSC_&_B-cell-CD19_Primary_Cells_Peripheral_UW,14_ReprPCWk-ENCODE2012-Dnd41_TCell_Leukemia,15_Quies-Other-Pancreas,15_Quies-Digestive-Rectal_Mucosa.Donor_29,15_Quies-Sm._Muscle-Duodenum_Smooth_Muscle,15_Quies-Other-Spleen,5_TxWk-Brain-Brain_Hippocampus_Middle,15_Quies-Sm._Muscle-Rectal_Smooth_Muscl…
chr10	116458995	116468550	pat_140	Loss	chr10	116466652	116466669	116466652	116466669	17	intergenic	ABLIM1,FAM160B1	Toh_HAR206	HAR_Merge50-00255	15_Quies-ES-deriv-hESC_Derived_CD56+_Mesoderm_Cultured_Cells,5_TxWk-Heart-Left_Ventricle,14_ReprPCWk-HSC_&_B-cell-CD19_Primary_Cells_Peripheral_UW,14_ReprPCWk-ENCODE2012-Dnd41_TCell_Leukemia,15_Quies-Other-Pancreas,15_Quies-Digestive-Rectal_Mucosa.Donor_29,15_Quies-Sm._Muscle-Duodenum_Smooth_Muscle,15_Quies-Other-Spleen,5_TxWk-Brain-Brain_Hippocampus_Middle,15_Quies-Sm._Muscle-Rectal_Smooth_Muscl…
chr10	116463981	116469552	pat_141	Loss	chr10	116466652	116466669	116466652	116466669	17	intergenic	ABLIM1,FAM160B1	Toh_HAR206	HAR_Merge50-00255	15_Quies-ES-deriv-hESC_Derived_CD56+_Mesoderm_Cultured_Cells,5_TxWk-Heart-Left_Ventricle,14_ReprPCWk-HSC_&_B-cell-CD19_Primary_Cells_Peripheral_UW,14_ReprPCWk-ENCODE2012-Dnd41_TCell_Leukemia,15_Quies-Other-Pancreas,15_Quies-Digestive-Rectal_Mucosa.Donor_29,15_Quies-Sm._Muscle-Duodenum_Smooth_Muscle,15_Quies-Other-Spleen,5_TxWk-Brain-Brain_Hippocampus_Middle,15_Quies-Sm._Muscle-Rectal_Smooth_Muscl…
chr10	116463981	116469552	pat_142	Loss	chr10	116466652	116466669	116466652	116466669	17	intergenic	ABLIM1,FAM160B1	Toh_HAR206	HAR_Merge50-00255	15_Quies-ES-deriv-hESC_Derived_CD56+_Mesoderm_Cultured_Cells,5_TxWk-Heart-Left_Ventricle,14_ReprPCWk-HSC_&_B-cell-CD19_Primary_Cells_Peripheral_UW,14_ReprPCWk-ENCODE2012-Dnd41_TCell_Leukemia,15_Quies-Other-Pancreas,15_Quies-Digestive-Rectal_Mucosa.Donor_29,15_Quies-Sm._Muscle-Duodenum_Smooth_Muscle,15_Quies-Other-Spleen,5_TxWk-Brain-Brain_Hippocampus_Middle,15_Quies-Sm._Muscle-Rectal_Smooth_Muscl…
chr10	117619806	117641864	pat_010	Loss	chr10	117636353	117636594	117636353	117636594	241	intronic	ATRNL1	Bird_HAR503	HAR_Merge50-00256	15_Quies-ES-deriv-hESC_Derived_CD56+_Mesoderm_Cultured_Cells,15_Quies-Digestive-Rectal_Mucosa.Donor_29,15_Quies-Sm._Muscle-Duodenum_Smooth_Muscle,15_Quies-Other-Spleen,15_Quies-Brain-Brain_Mid_Frontal_Lobe,15_Quies-Sm._Muscle-Rectal_Smooth_Muscle,15_Quies-ENCODE2012-HeLa-S3_Cervical_Carcinoma,15_Quies-HSC_&_B-cell-CD14_Primary_Cells,15_Quies-iPSC-iPS-20b_Cell_Line,15_Quies-HSC_&_B-cell-CD15_Prima…
chr10	117628047	117638513	pat_143	Loss	chr10	117636353	117636594	117636353	117636594	241	intronic	ATRNL1	Bird_HAR503	HAR_Merge50-00256	15_Quies-ES-deriv-hESC_Derived_CD56+_Mesoderm_Cultured_Cells,15_Quies-Digestive-Rectal_Mucosa.Donor_29,15_Quies-Sm._Muscle-Duodenum_Smooth_Muscle,15_Quies-Other-Spleen,15_Quies-Brain-Brain_Mid_Frontal_Lobe,15_Quies-Sm._Muscle-Rectal_Smooth_Muscle,15_Quies-ENCODE2012-HeLa-S3_Cervical_Carcinoma,15_Quies-HSC_&_B-cell-CD14_Primary_Cells,15_Quies-iPSC-iPS-20b_Cell_Line,15_Quies-HSC_&_B-cell-CD15_Prima…
chr10	117628047	117638513	pat_026	Loss	chr10	117636353	117636594	117636353	117636594	241	intronic	ATRNL1	Bird_HAR503	HAR_Merge50-00256	15_Quies-ES-deriv-hESC_Derived_CD56+_Mesoderm_Cultured_Cells,15_Quies-Digestive-Rectal_Mucosa.Donor_29,15_Quies-Sm._Muscle-Duodenum_Smooth_Muscle,15_Quies-Other-Spleen,15_Quies-Brain-Brain_Mid_Frontal_Lobe,15_Quies-Sm._Muscle-Rectal_Smooth_Muscle,15_Quies-ENCODE2012-HeLa-S3_Cervical_Carcinoma,15_Quies-HSC_&_B-cell-CD14_Primary_Cells,15_Quies-iPSC-iPS-20b_Cell_Line,15_Quies-HSC_&_B-cell-CD15_Prima…
chr10	117644409	117880489	pat_144	Gain	chr10	117775221	117775327	117775221	117775327	106	intergenic	ATRNL1,GFRA1	Prabhakar_HAR558	HAR_Merge50-00257	15_Quies-ES-deriv-hESC_Derived_CD56+_Mesoderm_Cultured_Cells,15_Quies-Other-Pancreas,15_Quies-Digestive-Rectal_Mucosa.Donor_29,15_Quies-Sm._Muscle-Duodenum_Smooth_Muscle,15_Quies-Other-Spleen,9_Het-Digestive-Sigmoid_Colon,15_Quies-Brain-Brain_Mid_Frontal_Lobe,15_Quies-Sm._Muscle-Rectal_Smooth_Muscle,15_Quies-ENCODE2012-HeLa-S3_Cervical_Carcinoma,15_Quies-HSC_&_B-cell-CD14_Primary_Cells,14_ReprPCW…
chr10	117758348	117794254	pat_010	Gain	chr10	117775221	117775327	117775221	117775327	106	intergenic	ATRNL1,GFRA1	Prabhakar_HAR558	HAR_Merge50-00257	15_Quies-ES-deriv-hESC_Derived_CD56+_Mesoderm_Cultured_Cells,15_Quies-Other-Pancreas,15_Quies-Digestive-Rectal_Mucosa.Donor_29,15_Quies-Sm._Muscle-Duodenum_Smooth_Muscle,15_Quies-Other-Spleen,9_Het-Digestive-Sigmoid_Colon,15_Quies-Brain-Brain_Mid_Frontal_Lobe,15_Quies-Sm._Muscle-Rectal_Smooth_Muscle,15_Quies-ENCODE2012-HeLa-S3_Cervical_Carcinoma,15_Quies-HSC_&_B-cell-CD14_Primary_Cells,14_ReprPCW…
chr10	119783143	119813494	pat_010	Gain	chr10	119803249	119803548	119803249	119803548	299	intronic	RAB11FIP2	Bird_HAR504	HAR_Merge50-00259	5_TxWk-HSC_&_B-cell-CD19_Primary_Cells_Peripheral_UW,5_TxWk-Heart-Left_Ventricle,7_Enh-HSC_&_B-cell-CD15_Primary_Cells,5_TxWk-ES-deriv-hESC_Derived_CD56+_Ectoderm_Cultured_Cells,5_TxWk-Epithelial-Penis_Foreskin_Fibroblast_Primary_Cells_skin02,5_TxWk-ENCODE2012-HepG2_Hepatocellular_Carcinoma,15_Quies-Other-Spleen,5_TxWk-ENCODE2012-NH-A_Astrocytes,5_TxWk-HSC_&_B-cell-CD14_Primary_Cells,5_TxWk-Epith…	RAB11FIP2
chr10	120077199	120143903	pat_010	Loss	chr10	120137707	120138104	120137707	120138104	397	intergenic	FAM204A,PRLHR	Prabhakar_HAR337,BUSH_HAR47	HAR_Merge50-00260	14_ReprPCWk-Neurosph-Neurosphere_Cultured_Cells_Ganglionic_Eminence_Derived,15_Quies-ES-deriv-hESC_Derived_CD56+_Mesoderm_Cultured_Cells,14_ReprPCWk-HSC_&_B-cell-CD19_Primary_Cells_Peripheral_UW,14_ReprPCWk-ENCODE2012-Dnd41_TCell_Leukemia,15_Quies-Other-Pancreas,14_ReprPCWk-ENCODE2012-A549_EtOH_0.02pct_Lung_Carcinoma,15_Quies-Other-Spleen,15_Quies-Brain-Brain_Mid_Frontal_Lobe,14_ReprPCWk-Mesench-…
chr10	120159880	120179626	pat_004	Loss	chr10	120175321	120175525	120175321	120175525	204	intergenic	FAM204A,PRLHR	Bird_HAR505	HAR_Merge50-00261	14_ReprPCWk-Neurosph-Neurosphere_Cultured_Cells_Ganglionic_Eminence_Derived,14_ReprPCWk-HSC_&_B-cell-CD19_Primary_Cells_Peripheral_UW,15_Quies-Other-Pancreas,15_Quies-Other-Spleen,15_Quies-Brain-Brain_Mid_Frontal_Lobe,15_Quies-Sm._Muscle-Rectal_Smooth_Muscle,14_ReprPCWk-Heart-Left_Ventricle,15_Quies-iPSC-iPS-20b_Cell_Line,14_ReprPCWk-HSC_&_B-cell-CD14_Primary_Cells,14_ReprPCWk-Digestive-Sigmoid_C…
chr10	122156470	122243761	pat_010	Loss	chr10	122169782	122170099	122169782	122170099	317	intergenic	MIR4682,PPAPDC1A	Prabhakar_HAR289	HAR_Merge50-00262	9_Het-Epithelial-Penis_Foreskin_Fibroblast_Primary_Cells_skin02,15_Quies-ES-deriv-hESC_Derived_CD56+_Mesoderm_Cultured_Cells,15_Quies-Other-Pancreas,14_ReprPCWk-ENCODE2012-Dnd41_TCell_Leukemia,15_Quies-Digestive-Rectal_Mucosa.Donor_29,15_Quies-Sm._Muscle-Duodenum_Smooth_Muscle,15_Quies-Other-Spleen,15_Quies-Sm._Muscle-Rectal_Smooth_Muscle,15_Quies-ENCODE2012-HeLa-S3_Cervical_Carcinoma,15_Quies-HS…
chr10	125137895	135427143	pat_145	Gain	chr10	125156057	125156397	125156057	125156397	340	intergenic	BUB3,GPR26	Bird_HAR506	HAR_Merge50-00265	9_Het-Epithelial-Penis_Foreskin_Fibroblast_Primary_Cells_skin02,15_Quies-ES-deriv-hESC_Derived_CD56+_Mesoderm_Cultured_Cells,5_TxWk-Digestive-Colonic_Mucosa,14_ReprPCWk-Muscle-Fetal_Muscle_Trunk,15_Quies-Other-Pancreas,15_Quies-Digestive-Rectal_Mucosa.Donor_29,9_Het-ENCODE2012-NHLF_Lung_Fibroblasts,15_Quies-Sm._Muscle-Duodenum_Smooth_Muscle,15_Quies-Other-Spleen,15_Quies-Brain-Brain_Mid_Frontal_L…
chr10	125137895	135427143	pat_145	Gain	chr10	125273687	125273865	125273687	125273865	178	intergenic	BUB3,GPR26	Toh_HAR419,Bird_HAR507	HAR_Merge50-00266	9_Het-Epithelial-Penis_Foreskin_Fibroblast_Primary_Cells_skin02,9_Het-Other-Ovary,15_Quies-Other-Pancreas,14_ReprPCWk-ENCODE2012-Dnd41_TCell_Leukemia,15_Quies-Digestive-Rectal_Mucosa.Donor_29,15_Quies-Sm._Muscle-Duodenum_Smooth_Muscle,15_Quies-Other-Spleen,14_ReprPCWk-ENCODE2012-A549_EtOH_0.02pct_Lung_Carcinoma,15_Quies-Sm._Muscle-Rectal_Smooth_Muscle,15_Quies-iPSC-iPS-20b_Cell_Line,14_ReprPCWk-H…
chr10	125137895	135427143	pat_145	Gain	chr10	126812857	126812879	126812857	126812879	22	intronic	CTBP2	Toh_HAR332	HAR_Merge50-00267	7_Enh-Heart-Aorta,5_TxWk-ES-deriv-hESC_Derived_CD56+_Ectoderm_Cultured_Cells,2_TssAFlnk-Sm._Muscle-Rectal_Smooth_Muscle,7_Enh-Digestive-Esophagus,2_TssAFlnk-Epithelial-Penis_Foreskin_Fibroblast_Primary_Cells_skin01,6_EnhG-Digestive-Fetal_Stomach,2_TssAFlnk-Sm._Muscle-Stomach_Smooth_Muscle,6_EnhG-ES-deriv-H9_Derived_Neuron_Cultured_Cells,7_Enh-Digestive-Stomach_Mucosa,5_TxWk-Other-Spleen,7_Enh-ENC…
chr10	125137895	135427143	pat_145	Gain	chr10	127190086	127190424	127190086	127190424	338	intergenic	CTBP2,LOC100169752	BUSH_HAR20	HAR_Merge50-00268	15_Quies-ES-deriv-hESC_Derived_CD56+_Mesoderm_Cultured_Cells,14_ReprPCWk-Muscle-Fetal_Muscle_Trunk,14_ReprPCWk-ENCODE2012-Dnd41_TCell_Leukemia,15_Quies-Other-Pancreas,15_Quies-Digestive-Rectal_Mucosa.Donor_29,15_Quies-Sm._Muscle-Duodenum_Smooth_Muscle,15_Quies-Other-Spleen,15_Quies-Brain-Brain_Mid_Frontal_Lobe,15_Quies-Sm._Muscle-Rectal_Smooth_Muscle,14_ReprPCWk-Mesench-Bone_Marrow_Derived_Mesenc…
chr10	125137895	135427143	pat_145	Gain	chr10	130774152	130774364	130774152	130774364	212	intergenic	MKI67,MGMT	Prabhakar_HAR850	HAR_Merge50-00269	9_Het-Epithelial-Penis_Foreskin_Fibroblast_Primary_Cells_skin02,14_ReprPCWk-Neurosph-Neurosphere_Cultured_Cells_Ganglionic_Eminence_Derived,15_Quies-ES-deriv-hESC_Derived_CD56+_Mesoderm_Cultured_Cells,14_ReprPCWk-Muscle-Fetal_Muscle_Trunk,15_Quies-Other-Pancreas,15_Quies-Digestive-Rectal_Mucosa.Donor_29,15_Quies-Sm._Muscle-Duodenum_Smooth_Muscle,15_Quies-Other-Spleen,15_Quies-Sm._Muscle-Rectal_Sm…
chr10	125137895	135427143	pat_145	Gain	chr10	130844170	130844395	130844170	130844395	225	intergenic	MKI67,MGMT	Toh_HAR532,Bird_HAR173,Pollard_HAR56	HAR_Merge50-00270	9_Het-Epithelial-Penis_Foreskin_Fibroblast_Primary_Cells_skin02,14_ReprPCWk-Neurosph-Neurosphere_Cultured_Cells_Ganglionic_Eminence_Derived,15_Quies-ES-deriv-hESC_Derived_CD56+_Mesoderm_Cultured_Cells,1_TssA-ENCODE2012-Osteoblasts,14_ReprPCWk-Digestive-Colonic_Mucosa,15_Quies-Other-Pancreas,2_TssAFlnk-Adipose-Adipose_Nuclei,11_BivFlnk-Muscle-Skeletal_Muscle_Female,14_ReprPCWk-ENCODE2012-A549_EtOH…	AK124226,MGMT
chr10	125137895	135427143	pat_145	Gain	chr10	130970067	130970425	130970067	130970425	358	intergenic	MKI67,MGMT	Bird_HAR57,Prabhakar_HAR8	HAR_Merge50-00271	15_Quies-ES-deriv-hESC_Derived_CD56+_Mesoderm_Cultured_Cells,15_Quies-Other-Pancreas,15_Quies-Sm._Muscle-Duodenum_Smooth_Muscle,15_Quies-Other-Spleen,14_ReprPCWk-Mesench-Bone_Marrow_Derived_Mesenchymal_Stem_Cell_Cultured_Cells,15_Quies-Sm._Muscle-Rectal_Smooth_Muscle,15_Quies-HSC_&_B-cell-CD14_Primary_Cells,15_Quies-iPSC-iPS-20b_Cell_Line,15_Quies-HSC_&_B-cell-CD15_Primary_Cells,15_Quies-ESC-ES-W…
chr10	125137895	135427143	pat_145	Gain	chr10	130982058	130982281	130982058	130982281	223	intergenic	MKI67,MGMT	Bird_HAR508	HAR_Merge50-00272	9_Het-Epithelial-Penis_Foreskin_Fibroblast_Primary_Cells_skin02,15_Quies-ES-deriv-hESC_Derived_CD56+_Mesoderm_Cultured_Cells,15_Quies-Other-Pancreas,15_Quies-Sm._Muscle-Duodenum_Smooth_Muscle,15_Quies-Other-Spleen,14_ReprPCWk-Mesench-Bone_Marrow_Derived_Mesenchymal_Stem_Cell_Cultured_Cells,15_Quies-Sm._Muscle-Rectal_Smooth_Muscle,15_Quies-HSC_&_B-cell-CD14_Primary_Cells,15_Quies-iPSC-iPS-20b_Cell…
chr10	125137895	135427143	pat_145	Gain	chr10	131129432	131129500	131129432	131129500	68	intergenic	MKI67,MGMT	Toh_HAR400	HAR_Merge50-00273	9_Het-Epithelial-Penis_Foreskin_Fibroblast_Primary_Cells_skin02,14_ReprPCWk-Neurosph-Neurosphere_Cultured_Cells_Ganglionic_Eminence_Derived,15_Quies-ES-deriv-hESC_Derived_CD56+_Mesoderm_Cultured_Cells,14_ReprPCWk-Muscle-Fetal_Muscle_Trunk,15_Quies-Other-Pancreas,15_Quies-Digestive-Rectal_Mucosa.Donor_29,15_Quies-Other-Spleen,15_Quies-Sm._Muscle-Rectal_Smooth_Muscle,14_ReprPCWk-Heart-Left_Ventricl…
chr10	125137895	135427143	pat_145	Gain	chr10	131232877	131233072	131232877	131233072	195	intergenic	MKI67,MGMT	Prabhakar_HAR271,Bird_HAR509	HAR_Merge50-00274	9_Het-Epithelial-Penis_Foreskin_Fibroblast_Primary_Cells_skin02,14_ReprPCWk-Neurosph-Neurosphere_Cultured_Cells_Ganglionic_Eminence_Derived,14_ReprPCWk-Muscle-Fetal_Muscle_Trunk,15_Quies-Other-Pancreas,15_Quies-Digestive-Rectal_Mucosa.Donor_29,15_Quies-Sm._Muscle-Duodenum_Smooth_Muscle,15_Quies-Other-Spleen,15_Quies-Brain-Brain_Mid_Frontal_Lobe,15_Quies-Sm._Muscle-Rectal_Smooth_Muscle,15_Quies-HS…
chr10	125137895	135427143	pat_145	Gain	chr10	131560944	131561518	131560944	131561518	574	intronic	MGMT	Bird_HAR510	HAR_Merge50-00275	5_TxWk-HSC_&_B-cell-CD19_Primary_Cells_Peripheral_UW,15_Quies-ES-deriv-hESC_Derived_CD56+_Mesoderm_Cultured_Cells,5_TxWk-Digestive-Colonic_Mucosa,14_ReprPCWk-Muscle-Fetal_Muscle_Trunk,5_TxWk-Heart-Left_Ventricle,5_TxWk-Blood_&_T-cell-CD4+_CD25-_CD45RA+_Naive_Primary_Cells,9_Het-ENCODE2012-NHLF_Lung_Fibroblasts,5_TxWk-Epithelial-Penis_Foreskin_Fibroblast_Primary_Cells_skin02,5_TxWk-Blood_&_T-cell-…
chr10	125137895	135427143	pat_145	Gain	chr10	131754168	131754688	131754168	131754688	520	intronic	EBF3	Bird_HAR511	HAR_Merge50-00276	12_EnhBiv-ES-deriv-hESC_Derived_CD56+_Ectoderm_Cultured_Cells,12_EnhBiv-ESC-4star,13_ReprPC-iPSC-iPS_DF_6.9_Cell_Line,10_TssBiv-Muscle-Skeletal_Muscle_Female,14_ReprPCWk-Digestive-Colonic_Mucosa,14_ReprPCWk-HSC_&_B-cell-CD19_Primary_Cells_Peripheral_UW,15_Quies-Other-Pancreas,12_EnhBiv-ESC-HUES48_Cell_Line,13_ReprPC-Digestive-Rectal_Mucosa.Donor_29,13_ReprPC-HSC_&_B-cell-CD14_Primary_Cells,2_TssA…
chr10	125137895	135427143	pat_145	Gain	chr10	133355893	133355955	133355893	133355955	62	intergenic	TCERG1L,FLJ46300	Toh_HAR340	HAR_Merge50-00277	9_Het-Epithelial-Penis_Foreskin_Fibroblast_Primary_Cells_skin02,15_Quies-ES-deriv-hESC_Derived_CD56+_Mesoderm_Cultured_Cells,14_ReprPCWk-Muscle-Fetal_Muscle_Trunk,14_ReprPCWk-ENCODE2012-Dnd41_TCell_Leukemia,15_Quies-Other-Pancreas,15_Quies-Digestive-Rectal_Mucosa.Donor_29,14_ReprPCWk-ENCODE2012-A549_EtOH_0.02pct_Lung_Carcinoma,15_Quies-Other-Spleen,15_Quies-Sm._Muscle-Rectal_Smooth_Muscle,15_Quie…
chr10	125137895	135427143	pat_145	Gain	chr10	134471350	134472057	134471350	134472057	707	intronic	INPP5A	Prabhakar_HAR475	HAR_Merge50-00278	5_TxWk-HSC_&_B-cell-CD19_Primary_Cells_Peripheral_UW,4_Tx-Muscle-Fetal_Muscle_Leg,5_TxWk-Digestive-Colonic_Mucosa,5_TxWk-Heart-Left_Ventricle,5_TxWk-Blood_&_T-cell-CD4+_CD25-_CD45RA+_Naive_Primary_Cells,7_Enh-Other-Adult_Liver,5_TxWk-ENCODE2012-NH-A_Astrocytes,5_TxWk-Brain-Brain_Hippocampus_Middle,5_TxWk-HSC_&_B-cell-CD14_Primary_Cells,15_Quies-ENCODE2012-HeLa-S3_Cervical_Carcinoma,15_Quies-iPSC-…
chr10	125138598	125239009	pat_010	Gain	chr10	125156057	125156397	125156057	125156397	340	intergenic	BUB3,GPR26	Bird_HAR506	HAR_Merge50-00265	9_Het-Epithelial-Penis_Foreskin_Fibroblast_Primary_Cells_skin02,15_Quies-ES-deriv-hESC_Derived_CD56+_Mesoderm_Cultured_Cells,5_TxWk-Digestive-Colonic_Mucosa,14_ReprPCWk-Muscle-Fetal_Muscle_Trunk,15_Quies-Other-Pancreas,15_Quies-Digestive-Rectal_Mucosa.Donor_29,9_Het-ENCODE2012-NHLF_Lung_Fibroblasts,15_Quies-Sm._Muscle-Duodenum_Smooth_Muscle,15_Quies-Other-Spleen,15_Quies-Brain-Brain_Mid_Frontal_L…
chr10	126803938	126814156	pat_010	Loss	chr10	126812857	126812879	126812857	126812879	22	intronic	CTBP2	Toh_HAR332	HAR_Merge50-00267	7_Enh-Heart-Aorta,5_TxWk-ES-deriv-hESC_Derived_CD56+_Ectoderm_Cultured_Cells,2_TssAFlnk-Sm._Muscle-Rectal_Smooth_Muscle,7_Enh-Digestive-Esophagus,2_TssAFlnk-Epithelial-Penis_Foreskin_Fibroblast_Primary_Cells_skin01,6_EnhG-Digestive-Fetal_Stomach,2_TssAFlnk-Sm._Muscle-Stomach_Smooth_Muscle,6_EnhG-ES-deriv-H9_Derived_Neuron_Cultured_Cells,7_Enh-Digestive-Stomach_Mucosa,5_TxWk-Other-Spleen,7_Enh-ENC…
chr10	127183385	127194779	pat_010	Gain	chr10	127190086	127190424	127190086	127190424	338	intergenic	CTBP2,LOC100169752	BUSH_HAR20	HAR_Merge50-00268	15_Quies-ES-deriv-hESC_Derived_CD56+_Mesoderm_Cultured_Cells,14_ReprPCWk-Muscle-Fetal_Muscle_Trunk,14_ReprPCWk-ENCODE2012-Dnd41_TCell_Leukemia,15_Quies-Other-Pancreas,15_Quies-Digestive-Rectal_Mucosa.Donor_29,15_Quies-Sm._Muscle-Duodenum_Smooth_Muscle,15_Quies-Other-Spleen,15_Quies-Brain-Brain_Mid_Frontal_Lobe,15_Quies-Sm._Muscle-Rectal_Smooth_Muscle,14_ReprPCWk-Mesench-Bone_Marrow_Derived_Mesenc…
chr10	130769969	130777727	pat_010	Loss	chr10	130774152	130774364	130774152	130774364	212	intergenic	MKI67,MGMT	Prabhakar_HAR850	HAR_Merge50-00269	9_Het-Epithelial-Penis_Foreskin_Fibroblast_Primary_Cells_skin02,14_ReprPCWk-Neurosph-Neurosphere_Cultured_Cells_Ganglionic_Eminence_Derived,15_Quies-ES-deriv-hESC_Derived_CD56+_Mesoderm_Cultured_Cells,14_ReprPCWk-Muscle-Fetal_Muscle_Trunk,15_Quies-Other-Pancreas,15_Quies-Digestive-Rectal_Mucosa.Donor_29,15_Quies-Sm._Muscle-Duodenum_Smooth_Muscle,15_Quies-Other-Spleen,15_Quies-Sm._Muscle-Rectal_Sm…
chr10	130832880	130866042	pat_010	Gain	chr10	130844170	130844395	130844170	130844395	225	intergenic	MKI67,MGMT	Toh_HAR532,Bird_HAR173,Pollard_HAR56	HAR_Merge50-00270	9_Het-Epithelial-Penis_Foreskin_Fibroblast_Primary_Cells_skin02,14_ReprPCWk-Neurosph-Neurosphere_Cultured_Cells_Ganglionic_Eminence_Derived,15_Quies-ES-deriv-hESC_Derived_CD56+_Mesoderm_Cultured_Cells,1_TssA-ENCODE2012-Osteoblasts,14_ReprPCWk-Digestive-Colonic_Mucosa,15_Quies-Other-Pancreas,2_TssAFlnk-Adipose-Adipose_Nuclei,11_BivFlnk-Muscle-Skeletal_Muscle_Female,14_ReprPCWk-ENCODE2012-A549_EtOH…	AK124226,MGMT
chr10	131126501	131156989	pat_010	Loss	chr10	131129432	131129500	131129432	131129500	68	intergenic	MKI67,MGMT	Toh_HAR400	HAR_Merge50-00273	9_Het-Epithelial-Penis_Foreskin_Fibroblast_Primary_Cells_skin02,14_ReprPCWk-Neurosph-Neurosphere_Cultured_Cells_Ganglionic_Eminence_Derived,15_Quies-ES-deriv-hESC_Derived_CD56+_Mesoderm_Cultured_Cells,14_ReprPCWk-Muscle-Fetal_Muscle_Trunk,15_Quies-Other-Pancreas,15_Quies-Digestive-Rectal_Mucosa.Donor_29,15_Quies-Other-Spleen,15_Quies-Sm._Muscle-Rectal_Smooth_Muscle,14_ReprPCWk-Heart-Left_Ventricl…
chr10	131223784	131243492	pat_010	Gain	chr10	131232877	131233072	131232877	131233072	195	intergenic	MKI67,MGMT	Prabhakar_HAR271,Bird_HAR509	HAR_Merge50-00274	9_Het-Epithelial-Penis_Foreskin_Fibroblast_Primary_Cells_skin02,14_ReprPCWk-Neurosph-Neurosphere_Cultured_Cells_Ganglionic_Eminence_Derived,14_ReprPCWk-Muscle-Fetal_Muscle_Trunk,15_Quies-Other-Pancreas,15_Quies-Digestive-Rectal_Mucosa.Donor_29,15_Quies-Sm._Muscle-Duodenum_Smooth_Muscle,15_Quies-Other-Spleen,15_Quies-Brain-Brain_Mid_Frontal_Lobe,15_Quies-Sm._Muscle-Rectal_Smooth_Muscle,15_Quies-HS…
chr10	131224798	131241341	pat_146	Gain	chr10	131232877	131233072	131232877	131233072	195	intergenic	MKI67,MGMT	Prabhakar_HAR271,Bird_HAR509	HAR_Merge50-00274	9_Het-Epithelial-Penis_Foreskin_Fibroblast_Primary_Cells_skin02,14_ReprPCWk-Neurosph-Neurosphere_Cultured_Cells_Ganglionic_Eminence_Derived,14_ReprPCWk-Muscle-Fetal_Muscle_Trunk,15_Quies-Other-Pancreas,15_Quies-Digestive-Rectal_Mucosa.Donor_29,15_Quies-Sm._Muscle-Duodenum_Smooth_Muscle,15_Quies-Other-Spleen,15_Quies-Brain-Brain_Mid_Frontal_Lobe,15_Quies-Sm._Muscle-Rectal_Smooth_Muscle,15_Quies-HS…
chr10	131552225	131645725	pat_010	Gain	chr10	131560944	131561518	131560944	131561518	574	intronic	MGMT	Bird_HAR510	HAR_Merge50-00275	5_TxWk-HSC_&_B-cell-CD19_Primary_Cells_Peripheral_UW,15_Quies-ES-deriv-hESC_Derived_CD56+_Mesoderm_Cultured_Cells,5_TxWk-Digestive-Colonic_Mucosa,14_ReprPCWk-Muscle-Fetal_Muscle_Trunk,5_TxWk-Heart-Left_Ventricle,5_TxWk-Blood_&_T-cell-CD4+_CD25-_CD45RA+_Naive_Primary_Cells,9_Het-ENCODE2012-NHLF_Lung_Fibroblasts,5_TxWk-Epithelial-Penis_Foreskin_Fibroblast_Primary_Cells_skin02,5_TxWk-Blood_&_T-cell-…
chr10	131730865	131777238	pat_010	Loss	chr10	131754168	131754688	131754168	131754688	520	intronic	EBF3	Bird_HAR511	HAR_Merge50-00276	12_EnhBiv-ES-deriv-hESC_Derived_CD56+_Ectoderm_Cultured_Cells,12_EnhBiv-ESC-4star,13_ReprPC-iPSC-iPS_DF_6.9_Cell_Line,10_TssBiv-Muscle-Skeletal_Muscle_Female,14_ReprPCWk-Digestive-Colonic_Mucosa,14_ReprPCWk-HSC_&_B-cell-CD19_Primary_Cells_Peripheral_UW,15_Quies-Other-Pancreas,12_EnhBiv-ESC-HUES48_Cell_Line,13_ReprPC-Digestive-Rectal_Mucosa.Donor_29,13_ReprPC-HSC_&_B-cell-CD14_Primary_Cells,2_TssA…
chr10	133136701	133514942	pat_009	Gain	chr10	133355893	133355955	133355893	133355955	62	intergenic	TCERG1L,FLJ46300	Toh_HAR340	HAR_Merge50-00277	9_Het-Epithelial-Penis_Foreskin_Fibroblast_Primary_Cells_skin02,15_Quies-ES-deriv-hESC_Derived_CD56+_Mesoderm_Cultured_Cells,14_ReprPCWk-Muscle-Fetal_Muscle_Trunk,14_ReprPCWk-ENCODE2012-Dnd41_TCell_Leukemia,15_Quies-Other-Pancreas,15_Quies-Digestive-Rectal_Mucosa.Donor_29,14_ReprPCWk-ENCODE2012-A549_EtOH_0.02pct_Lung_Carcinoma,15_Quies-Other-Spleen,15_Quies-Sm._Muscle-Rectal_Smooth_Muscle,15_Quie…
chr10	133153936	133466054	pat_013	Gain	chr10	133355893	133355955	133355893	133355955	62	intergenic	TCERG1L,FLJ46300	Toh_HAR340	HAR_Merge50-00277	9_Het-Epithelial-Penis_Foreskin_Fibroblast_Primary_Cells_skin02,15_Quies-ES-deriv-hESC_Derived_CD56+_Mesoderm_Cultured_Cells,14_ReprPCWk-Muscle-Fetal_Muscle_Trunk,14_ReprPCWk-ENCODE2012-Dnd41_TCell_Leukemia,15_Quies-Other-Pancreas,15_Quies-Digestive-Rectal_Mucosa.Donor_29,14_ReprPCWk-ENCODE2012-A549_EtOH_0.02pct_Lung_Carcinoma,15_Quies-Other-Spleen,15_Quies-Sm._Muscle-Rectal_Smooth_Muscle,15_Quie…
chr10	133284222	133469716	pat_010	Gain	chr10	133355893	133355955	133355893	133355955	62	intergenic	TCERG1L,FLJ46300	Toh_HAR340	HAR_Merge50-00277	9_Het-Epithelial-Penis_Foreskin_Fibroblast_Primary_Cells_skin02,15_Quies-ES-deriv-hESC_Derived_CD56+_Mesoderm_Cultured_Cells,14_ReprPCWk-Muscle-Fetal_Muscle_Trunk,14_ReprPCWk-ENCODE2012-Dnd41_TCell_Leukemia,15_Quies-Other-Pancreas,15_Quies-Digestive-Rectal_Mucosa.Donor_29,14_ReprPCWk-ENCODE2012-A549_EtOH_0.02pct_Lung_Carcinoma,15_Quies-Other-Spleen,15_Quies-Sm._Muscle-Rectal_Smooth_Muscle,15_Quie…
chr11	486084	515331	pat_136	Loss	chr11	508178	508761	508178	508761	583	upstream	RNH1	Bird_HAR563	HAR_Merge50-00279	5_TxWk-HSC_&_B-cell-CD19_Primary_Cells_Peripheral_UW,5_TxWk-Digestive-Colonic_Mucosa,5_TxWk-Heart-Left_Ventricle,2_TssAFlnk-Brain-Brain_Mid_Frontal_Lobe,5_TxWk-Blood_&_T-cell-CD4+_CD25-_CD45RA+_Naive_Primary_Cells,7_Enh-HSC_&_B-cell-CD15_Primary_Cells,6_EnhG-Digestive-Duodenum_Mucosa,2_TssAFlnk-ENCODE2012-K562_Leukemia,1_TssA-ES-deriv-hESC_Derived_CD56+_Mesoderm_Cultured_Cells,2_TssAFlnk-Adipose-…
chr11	486084	516116	pat_147	Loss	chr11	508178	508761	508178	508761	583	upstream	RNH1	Bird_HAR563	HAR_Merge50-00279	5_TxWk-HSC_&_B-cell-CD19_Primary_Cells_Peripheral_UW,5_TxWk-Digestive-Colonic_Mucosa,5_TxWk-Heart-Left_Ventricle,2_TssAFlnk-Brain-Brain_Mid_Frontal_Lobe,5_TxWk-Blood_&_T-cell-CD4+_CD25-_CD45RA+_Naive_Primary_Cells,7_Enh-HSC_&_B-cell-CD15_Primary_Cells,6_EnhG-Digestive-Duodenum_Mucosa,2_TssAFlnk-ENCODE2012-K562_Leukemia,1_TssA-ES-deriv-hESC_Derived_CD56+_Mesoderm_Cultured_Cells,2_TssAFlnk-Adipose-…
chr11	486084	516507	pat_100	Loss	chr11	508178	508761	508178	508761	583	upstream	RNH1	Bird_HAR563	HAR_Merge50-00279	5_TxWk-HSC_&_B-cell-CD19_Primary_Cells_Peripheral_UW,5_TxWk-Digestive-Colonic_Mucosa,5_TxWk-Heart-Left_Ventricle,2_TssAFlnk-Brain-Brain_Mid_Frontal_Lobe,5_TxWk-Blood_&_T-cell-CD4+_CD25-_CD45RA+_Naive_Primary_Cells,7_Enh-HSC_&_B-cell-CD15_Primary_Cells,6_EnhG-Digestive-Duodenum_Mucosa,2_TssAFlnk-ENCODE2012-K562_Leukemia,1_TssA-ES-deriv-hESC_Derived_CD56+_Mesoderm_Cultured_Cells,2_TssAFlnk-Adipose-…
chr11	491333	648557	pat_010	Gain	chr11	508178	508761	508178	508761	583	upstream	RNH1	Bird_HAR563	HAR_Merge50-00279	5_TxWk-HSC_&_B-cell-CD19_Primary_Cells_Peripheral_UW,5_TxWk-Digestive-Colonic_Mucosa,5_TxWk-Heart-Left_Ventricle,2_TssAFlnk-Brain-Brain_Mid_Frontal_Lobe,5_TxWk-Blood_&_T-cell-CD4+_CD25-_CD45RA+_Naive_Primary_Cells,7_Enh-HSC_&_B-cell-CD15_Primary_Cells,6_EnhG-Digestive-Duodenum_Mucosa,2_TssAFlnk-ENCODE2012-K562_Leukemia,1_TssA-ES-deriv-hESC_Derived_CD56+_Mesoderm_Cultured_Cells,2_TssAFlnk-Adipose-…
chr11	2624688	2677757	pat_148	Gain	chr11	2646010	2646863	2646010	2646863	853	ncRNA_exonic	KCNQ1OT1	Bird_HAR136	HAR_Merge50-00280	14_ReprPCWk-Neurosph-Neurosphere_Cultured_Cells_Ganglionic_Eminence_Derived,5_TxWk-HSC_&_B-cell-CD19_Primary_Cells_Peripheral_UW,13_ReprPC-iPSC-iPS_DF_6.9_Cell_Line,5_TxWk-Heart-Left_Ventricle,5_TxWk-Blood_&_T-cell-CD4+_CD25-_CD45RA+_Naive_Primary_Cells,15_Quies-Digestive-Rectal_Mucosa.Donor_29,5_TxWk-Blood_&_T-cell-CD3_Primary_Cells_Cord_BI,15_Quies-Sm._Muscle-Duodenum_Smooth_Muscle,15_Quies-Oth…
chr11	2641128	2656128	pat_076	Gain	chr11	2646010	2646863	2646010	2646863	853	ncRNA_exonic	KCNQ1OT1	Bird_HAR136	HAR_Merge50-00280	14_ReprPCWk-Neurosph-Neurosphere_Cultured_Cells_Ganglionic_Eminence_Derived,5_TxWk-HSC_&_B-cell-CD19_Primary_Cells_Peripheral_UW,13_ReprPC-iPSC-iPS_DF_6.9_Cell_Line,5_TxWk-Heart-Left_Ventricle,5_TxWk-Blood_&_T-cell-CD4+_CD25-_CD45RA+_Naive_Primary_Cells,15_Quies-Digestive-Rectal_Mucosa.Donor_29,5_TxWk-Blood_&_T-cell-CD3_Primary_Cells_Cord_BI,15_Quies-Sm._Muscle-Duodenum_Smooth_Muscle,15_Quies-Oth…
chr11	2643292	2731850	pat_012	Gain	chr11	2646010	2646863	2646010	2646863	853	ncRNA_exonic	KCNQ1OT1	Bird_HAR136	HAR_Merge50-00280	14_ReprPCWk-Neurosph-Neurosphere_Cultured_Cells_Ganglionic_Eminence_Derived,5_TxWk-HSC_&_B-cell-CD19_Primary_Cells_Peripheral_UW,13_ReprPC-iPSC-iPS_DF_6.9_Cell_Line,5_TxWk-Heart-Left_Ventricle,5_TxWk-Blood_&_T-cell-CD4+_CD25-_CD45RA+_Naive_Primary_Cells,15_Quies-Digestive-Rectal_Mucosa.Donor_29,5_TxWk-Blood_&_T-cell-CD3_Primary_Cells_Cord_BI,15_Quies-Sm._Muscle-Duodenum_Smooth_Muscle,15_Quies-Oth…
chr11	2644001	2677757	pat_149	Gain	chr11	2646010	2646863	2646010	2646863	853	ncRNA_exonic	KCNQ1OT1	Bird_HAR136	HAR_Merge50-00280	14_ReprPCWk-Neurosph-Neurosphere_Cultured_Cells_Ganglionic_Eminence_Derived,5_TxWk-HSC_&_B-cell-CD19_Primary_Cells_Peripheral_UW,13_ReprPC-iPSC-iPS_DF_6.9_Cell_Line,5_TxWk-Heart-Left_Ventricle,5_TxWk-Blood_&_T-cell-CD4+_CD25-_CD45RA+_Naive_Primary_Cells,15_Quies-Digestive-Rectal_Mucosa.Donor_29,5_TxWk-Blood_&_T-cell-CD3_Primary_Cells_Cord_BI,15_Quies-Sm._Muscle-Duodenum_Smooth_Muscle,15_Quies-Oth…
chr11	2644438	2654673	pat_010	Loss	chr11	2646010	2646863	2646010	2646863	853	ncRNA_exonic	KCNQ1OT1	Bird_HAR136	HAR_Merge50-00280	14_ReprPCWk-Neurosph-Neurosphere_Cultured_Cells_Ganglionic_Eminence_Derived,5_TxWk-HSC_&_B-cell-CD19_Primary_Cells_Peripheral_UW,13_ReprPC-iPSC-iPS_DF_6.9_Cell_Line,5_TxWk-Heart-Left_Ventricle,5_TxWk-Blood_&_T-cell-CD4+_CD25-_CD45RA+_Naive_Primary_Cells,15_Quies-Digestive-Rectal_Mucosa.Donor_29,5_TxWk-Blood_&_T-cell-CD3_Primary_Cells_Cord_BI,15_Quies-Sm._Muscle-Duodenum_Smooth_Muscle,15_Quies-Oth…
chr11	8333825	8404566	pat_010	Gain	chr11	8337517	8337800	8337517	8337800	283	intergenic	LMO1,STK33	Prabhakar_HAR364,Toh_HAR286	HAR_Merge50-00283	15_Quies-ES-deriv-hESC_Derived_CD56+_Mesoderm_Cultured_Cells,14_ReprPCWk-Muscle-Fetal_Muscle_Trunk,14_ReprPCWk-ENCODE2012-Dnd41_TCell_Leukemia,15_Quies-Other-Pancreas,15_Quies-Digestive-Rectal_Mucosa.Donor_29,13_ReprPC-IMR90-IMR90_Cell_Line,2_TssAFlnk-Sm._Muscle-Stomach_Smooth_Muscle,15_Quies-Sm._Muscle-Duodenum_Smooth_Muscle,15_Quies-Other-Spleen,15_Quies-Brain-Brain_Mid_Frontal_Lobe,14_ReprPCWk…
chr11	8333825	8404566	pat_010	Gain	chr11	8378650	8378871	8378650	8378871	221	intergenic	LMO1,STK33	Toh_HAR135,Pollard_HAR77,Bird_HAR565	HAR_Merge50-00284	15_Quies-ES-deriv-hESC_Derived_CD56+_Mesoderm_Cultured_Cells,14_ReprPCWk-Digestive-Colonic_Mucosa,14_ReprPCWk-HSC_&_B-cell-CD19_Primary_Cells_Peripheral_UW,14_ReprPCWk-ENCODE2012-Dnd41_TCell_Leukemia,15_Quies-Digestive-Rectal_Mucosa.Donor_29,7_Enh-Digestive-Esophagus,2_TssAFlnk-Sm._Muscle-Stomach_Smooth_Muscle,15_Quies-Sm._Muscle-Duodenum_Smooth_Muscle,15_Quies-Other-Spleen,15_Quies-Brain-Brain_M…
chr11	8333825	8404566	pat_010	Gain	chr11	8383717	8384193	8383717	8384193	476	intergenic	LMO1,STK33	Toh_HAR346,Prabhakar_HAR147	HAR_Merge50-00285	15_Quies-ES-deriv-hESC_Derived_CD56+_Mesoderm_Cultured_Cells,14_ReprPCWk-Muscle-Fetal_Muscle_Trunk,14_ReprPCWk-Digestive-Colonic_Mucosa,15_Quies-Other-Pancreas,14_ReprPCWk-ENCODE2012-Dnd41_TCell_Leukemia,15_Quies-Digestive-Rectal_Mucosa.Donor_29,13_ReprPC-IMR90-IMR90_Cell_Line,15_Quies-Sm._Muscle-Duodenum_Smooth_Muscle,15_Quies-Other-Spleen,15_Quies-Brain-Brain_Mid_Frontal_Lobe,14_ReprPCWk-Mesenc…
chr11	10322570	10348782	pat_010	Loss	chr11	10342686	10343041	10342686	10343041	355	ncRNA_intronic	CAND1.11	Bird_HAR532	HAR_Merge50-00286	5_TxWk-HSC_&_B-cell-CD19_Primary_Cells_Peripheral_UW,15_Quies-ES-deriv-hESC_Derived_CD56+_Mesoderm_Cultured_Cells,5_TxWk-Heart-Left_Ventricle,5_TxWk-Epithelial-Penis_Foreskin_Fibroblast_Primary_Cells_skin02,5_TxWk-ENCODE2012-HepG2_Hepatocellular_Carcinoma,15_Quies-Other-Spleen,5_TxWk-Brain-Brain_Hippocampus_Middle,15_Quies-ENCODE2012-HeLa-S3_Cervical_Carcinoma,15_Quies-HSC_&_B-cell-CD14_Primary_C…	ADM,ADM,MRVI1,AMPD3,LOC440028
chr11	14101735	14158534	pat_010	Gain	chr11	14128627	14129007	14128627	14129007	380	intronic	SPON1	Bird_HAR544	HAR_Merge50-00287	15_Quies-ES-deriv-hESC_Derived_CD56+_Mesoderm_Cultured_Cells,14_ReprPCWk-ENCODE2012-Dnd41_TCell_Leukemia,15_Quies-Other-Pancreas,15_Quies-Digestive-Rectal_Mucosa.Donor_29,5_TxWk-Blood_&_T-cell-CD3_Primary_Cells_Cord_BI,15_Quies-Other-Spleen,14_ReprPCWk-ENCODE2012-A549_EtOH_0.02pct_Lung_Carcinoma,15_Quies-Brain-Brain_Mid_Frontal_Lobe,14_ReprPCWk-Mesench-Bone_Marrow_Derived_Mesenchymal_Stem_Cell_Cu…
chr11	16125838	16143103	pat_010	Loss	chr11	16133871	16134319	16133871	16134319	448	intronic	SOX6	Bird_HAR546	HAR_Merge50-00289	5_TxWk-Heart-Left_Ventricle,14_ReprPCWk-ENCODE2012-Dnd41_TCell_Leukemia,15_Quies-Digestive-Rectal_Mucosa.Donor_29,5_TxWk-ES-deriv-hESC_Derived_CD56+_Ectoderm_Cultured_Cells,5_TxWk-ENCODE2012-HepG2_Hepatocellular_Carcinoma,7_Enh-Other-Adult_Liver,15_Quies-Sm._Muscle-Duodenum_Smooth_Muscle,15_Quies-Other-Spleen,15_Quies-Brain-Brain_Mid_Frontal_Lobe,15_Quies-Sm._Muscle-Rectal_Smooth_Muscle,15_Quies-…
chr11	16402987	16437515	pat_010	Gain	chr11	16423720	16424159	16423720	16424159	439	intronic	SOX6	Bird_HAR547	HAR_Merge50-00290	12_EnhBiv-ES-deriv-hESC_Derived_CD56+_Ectoderm_Cultured_Cells,15_Quies-ES-deriv-hESC_Derived_CD56+_Mesoderm_Cultured_Cells,14_ReprPCWk-ENCODE2012-Dnd41_TCell_Leukemia,15_Quies-Other-Pancreas,15_Quies-Digestive-Rectal_Mucosa.Donor_29,12_EnhBiv-ESC-HUES48_Cell_Line,15_Quies-Sm._Muscle-Duodenum_Smooth_Muscle,14_ReprPCWk-ENCODE2012-A549_EtOH_0.02pct_Lung_Carcinoma,15_Quies-Other-Spleen,15_Quies-Brain…	SOX6
chr11	18960115	20217259	pat_013	Gain	chr11	19806909	19807205	19806909	19807205	296	intronic	NAV2	Bird_HAR183,Prabhakar_HAR684	HAR_Merge50-00291	14_ReprPCWk-Neurosph-Neurosphere_Cultured_Cells_Ganglionic_Eminence_Derived,15_Quies-ES-deriv-hESC_Derived_CD56+_Mesoderm_Cultured_Cells,14_ReprPCWk-Muscle-Fetal_Muscle_Trunk,5_TxWk-Heart-Left_Ventricle,15_Quies-Other-Pancreas,14_ReprPCWk-ENCODE2012-Dnd41_TCell_Leukemia,15_Quies-Digestive-Rectal_Mucosa.Donor_29,5_TxWk-Epithelial-Penis_Foreskin_Fibroblast_Primary_Cells_skin02,15_Quies-Sm._Muscle-D…
chr11	18962120	20217655	pat_009	Gain	chr11	19806909	19807205	19806909	19807205	296	intronic	NAV2	Bird_HAR183,Prabhakar_HAR684	HAR_Merge50-00291	14_ReprPCWk-Neurosph-Neurosphere_Cultured_Cells_Ganglionic_Eminence_Derived,15_Quies-ES-deriv-hESC_Derived_CD56+_Mesoderm_Cultured_Cells,14_ReprPCWk-Muscle-Fetal_Muscle_Trunk,5_TxWk-Heart-Left_Ventricle,15_Quies-Other-Pancreas,14_ReprPCWk-ENCODE2012-Dnd41_TCell_Leukemia,15_Quies-Digestive-Rectal_Mucosa.Donor_29,5_TxWk-Epithelial-Penis_Foreskin_Fibroblast_Primary_Cells_skin02,15_Quies-Sm._Muscle-D…
chr11	19796489	19808951	pat_010	Loss	chr11	19806909	19807205	19806909	19807205	296	intronic	NAV2	Bird_HAR183,Prabhakar_HAR684	HAR_Merge50-00291	14_ReprPCWk-Neurosph-Neurosphere_Cultured_Cells_Ganglionic_Eminence_Derived,15_Quies-ES-deriv-hESC_Derived_CD56+_Mesoderm_Cultured_Cells,14_ReprPCWk-Muscle-Fetal_Muscle_Trunk,5_TxWk-Heart-Left_Ventricle,15_Quies-Other-Pancreas,14_ReprPCWk-ENCODE2012-Dnd41_TCell_Leukemia,15_Quies-Digestive-Rectal_Mucosa.Donor_29,5_TxWk-Epithelial-Penis_Foreskin_Fibroblast_Primary_Cells_skin02,15_Quies-Sm._Muscle-D…
chr11	22510130	22628794	pat_010	Loss	chr11	22513317	22513656	22513317	22513656	339	intergenic	SLC17A6,FANCF	Bird_HAR549,Toh_HAR235	HAR_Merge50-00293	15_Quies-ES-deriv-hESC_Derived_CD56+_Mesoderm_Cultured_Cells,15_Quies-Other-Pancreas,15_Quies-Digestive-Rectal_Mucosa.Donor_29,15_Quies-Sm._Muscle-Duodenum_Smooth_Muscle,14_ReprPCWk-ENCODE2012-A549_EtOH_0.02pct_Lung_Carcinoma,15_Quies-Other-Spleen,14_ReprPCWk-Mesench-Bone_Marrow_Derived_Mesenchymal_Stem_Cell_Cultured_Cells,15_Quies-Sm._Muscle-Rectal_Smooth_Muscle,15_Quies-ENCODE2012-HeLa-S3_Cervi…
chr11	30625371	30727628	pat_010	Loss	chr11	30718513	30718672	30718513	30718672	159	intergenic	MPPED2,DCDC5	Bird_HAR551,Prabhakar_HAR144	HAR_Merge50-00297	15_Quies-ES-deriv-hESC_Derived_CD56+_Mesoderm_Cultured_Cells,15_Quies-Other-Pancreas,15_Quies-Digestive-Rectal_Mucosa.Donor_29,15_Quies-Sm._Muscle-Duodenum_Smooth_Muscle,15_Quies-Other-Spleen,15_Quies-Brain-Brain_Mid_Frontal_Lobe,15_Quies-Sm._Muscle-Rectal_Smooth_Muscle,15_Quies-ENCODE2012-HeLa-S3_Cervical_Carcinoma,15_Quies-HSC_&_B-cell-CD14_Primary_Cells,15_Quies-iPSC-iPS-20b_Cell_Line,15_Quies…
chr11	30730321	30768620	pat_010	Gain	chr11	30741300	30741499	30741300	30741499	199	intergenic	MPPED2,DCDC5	Prabhakar_HAR938	HAR_Merge50-00298	15_Quies-ES-deriv-hESC_Derived_CD56+_Mesoderm_Cultured_Cells,15_Quies-Other-Pancreas,15_Quies-Digestive-Rectal_Mucosa.Donor_29,15_Quies-Sm._Muscle-Duodenum_Smooth_Muscle,15_Quies-Other-Spleen,15_Quies-Brain-Brain_Mid_Frontal_Lobe,15_Quies-Sm._Muscle-Rectal_Smooth_Muscle,15_Quies-ENCODE2012-HeLa-S3_Cervical_Carcinoma,15_Quies-HSC_&_B-cell-CD14_Primary_Cells,15_Quies-iPSC-iPS-20b_Cell_Line,15_Quies…
chr11	31601381	32208950	pat_068	Gain	chr11	31830764	31830791	31830764	31830791	27	intronic	PAX6	Toh_HAR441	HAR_Merge50-00302	1_TssA-ES-deriv-H9_Derived_Neuronal_Progenitor_Cultured_Cells,13_ReprPC-iPSC-iPS_DF_6.9_Cell_Line,12_EnhBiv-ESC-4star,14_ReprPCWk-ENCODE2012-Dnd41_TCell_Leukemia,12_EnhBiv-ESC-HUES48_Cell_Line,13_ReprPC-Digestive-Rectal_Mucosa.Donor_29,13_ReprPC-IMR90-IMR90_Cell_Line,13_ReprPC-Digestive-Rectal_Mucosa.Donor_31,12_EnhBiv-Blood_&_T-cell-CD4_Naive_Primary_Cells,12_EnhBiv-ES-deriv-H1_BMP4_Derived_Mese…	DKFZp686K1684,IMMP1L,ELP4
chr11	31601381	32208950	pat_068	Gain	chr11	32037199	32037333	32037199	32037333	134	intergenic	DKFZp686K1684,RCN1	BUSH_HAR7,Toh_HAR456,Bird_HAR184	HAR_Merge50-00303	14_ReprPCWk-Neurosph-Neurosphere_Cultured_Cells_Ganglionic_Eminence_Derived,15_Quies-ES-deriv-hESC_Derived_CD56+_Mesoderm_Cultured_Cells,14_ReprPCWk-ENCODE2012-Dnd41_TCell_Leukemia,15_Quies-Other-Pancreas,15_Quies-Digestive-Rectal_Mucosa.Donor_29,13_ReprPC-IMR90-IMR90_Cell_Line,15_Quies-Other-Spleen,14_ReprPCWk-Mesench-Bone_Marrow_Derived_Mesenchymal_Stem_Cell_Cultured_Cells,14_ReprPCWk-Heart-Lef…
chr11	31601381	32208950	pat_068	Gain	chr11	31686452	31686846	31686452	31686846	394	intronic	ELP4	Toh_HAR514,Bird_HAR553	HAR_Merge50-00301	15_Quies-ES-deriv-hESC_Derived_CD56+_Mesoderm_Cultured_Cells,15_Quies-Other-Pancreas,15_Quies-Digestive-Rectal_Mucosa.Donor_29,5_TxWk-Blood_&_T-cell-CD3_Primary_Cells_Cord_BI,15_Quies-Sm._Muscle-Duodenum_Smooth_Muscle,15_Quies-Other-Spleen,5_TxWk-ENCODE2012-NH-A_Astrocytes,15_Quies-Brain-Brain_Mid_Frontal_Lobe,15_Quies-Sm._Muscle-Rectal_Smooth_Muscle,15_Quies-ENCODE2012-HeLa-S3_Cervical_Carcinoma…
chr11	31601381	32208950	pat_068	Gain	chr11	32128760	32129195	32128760	32129195	435	intergenic	RCN1,WT1	Bird_HAR390	HAR_Merge50-00304	5_TxWk-Heart-Left_Ventricle,5_TxWk-ES-deriv-hESC_Derived_CD56+_Ectoderm_Cultured_Cells,5_TxWk-Epithelial-Penis_Foreskin_Fibroblast_Primary_Cells_skin02,5_TxWk-Blood_&_T-cell-CD3_Primary_Cells_Cord_BI,5_TxWk-ENCODE2012-NH-A_Astrocytes,15_Quies-Brain-Brain_Mid_Frontal_Lobe,5_TxWk-Brain-Brain_Hippocampus_Middle,5_TxWk-HSC_&_B-cell-CD14_Primary_Cells,15_Quies-Sm._Muscle-Rectal_Smooth_Muscle,5_TxWk-Ot…
chr11	31671438	31686633	pat_010	Loss	chr11	31686452	31686846	31686452	31686633	181	intronic	ELP4	Toh_HAR514,Bird_HAR553	HAR_Merge50-00301	15_Quies-ES-deriv-hESC_Derived_CD56+_Mesoderm_Cultured_Cells,15_Quies-Other-Pancreas,15_Quies-Digestive-Rectal_Mucosa.Donor_29,5_TxWk-Blood_&_T-cell-CD3_Primary_Cells_Cord_BI,15_Quies-Sm._Muscle-Duodenum_Smooth_Muscle,15_Quies-Other-Spleen,5_TxWk-ENCODE2012-NH-A_Astrocytes,15_Quies-Brain-Brain_Mid_Frontal_Lobe,15_Quies-Sm._Muscle-Rectal_Smooth_Muscle,15_Quies-ENCODE2012-HeLa-S3_Cervical_Carcinoma…
chr11	31686752	31700721	pat_010	Gain	chr11	31686452	31686846	31686752	31686846	94	intronic	ELP4	Toh_HAR514,Bird_HAR553	HAR_Merge50-00301	15_Quies-ES-deriv-hESC_Derived_CD56+_Mesoderm_Cultured_Cells,15_Quies-Other-Pancreas,15_Quies-Digestive-Rectal_Mucosa.Donor_29,5_TxWk-Blood_&_T-cell-CD3_Primary_Cells_Cord_BI,15_Quies-Sm._Muscle-Duodenum_Smooth_Muscle,15_Quies-Other-Spleen,5_TxWk-ENCODE2012-NH-A_Astrocytes,15_Quies-Brain-Brain_Mid_Frontal_Lobe,15_Quies-Sm._Muscle-Rectal_Smooth_Muscle,15_Quies-ENCODE2012-HeLa-S3_Cervical_Carcinoma…
chr11	31813871	31850859	pat_010	Loss	chr11	31830764	31830791	31830764	31830791	27	intronic	PAX6	Toh_HAR441	HAR_Merge50-00302	1_TssA-ES-deriv-H9_Derived_Neuronal_Progenitor_Cultured_Cells,13_ReprPC-iPSC-iPS_DF_6.9_Cell_Line,12_EnhBiv-ESC-4star,14_ReprPCWk-ENCODE2012-Dnd41_TCell_Leukemia,12_EnhBiv-ESC-HUES48_Cell_Line,13_ReprPC-Digestive-Rectal_Mucosa.Donor_29,13_ReprPC-IMR90-IMR90_Cell_Line,13_ReprPC-Digestive-Rectal_Mucosa.Donor_31,12_EnhBiv-Blood_&_T-cell-CD4_Naive_Primary_Cells,12_EnhBiv-ES-deriv-H1_BMP4_Derived_Mese…	DKFZp686K1684,IMMP1L,ELP4
chr11	32091060	32133096	pat_010	Loss	chr11	32128760	32129195	32128760	32129195	435	intergenic	RCN1,WT1	Bird_HAR390	HAR_Merge50-00304	5_TxWk-Heart-Left_Ventricle,5_TxWk-ES-deriv-hESC_Derived_CD56+_Ectoderm_Cultured_Cells,5_TxWk-Epithelial-Penis_Foreskin_Fibroblast_Primary_Cells_skin02,5_TxWk-Blood_&_T-cell-CD3_Primary_Cells_Cord_BI,5_TxWk-ENCODE2012-NH-A_Astrocytes,15_Quies-Brain-Brain_Mid_Frontal_Lobe,5_TxWk-Brain-Brain_Hippocampus_Middle,5_TxWk-HSC_&_B-cell-CD14_Primary_Cells,15_Quies-Sm._Muscle-Rectal_Smooth_Muscle,5_TxWk-Ot…
chr11	33926620	33954238	pat_010	Loss	chr11	33928249	33928741	33928249	33928741	492	intergenic	LMO2,CAPRIN1	Prabhakar_HAR860	HAR_Merge50-00306	5_TxWk-HSC_&_B-cell-CD19_Primary_Cells_Peripheral_UW,14_ReprPCWk-Muscle-Fetal_Muscle_Trunk,7_Enh-HSC_&_B-cell-CD15_Primary_Cells,14_ReprPCWk-ENCODE2012-Dnd41_TCell_Leukemia,15_Quies-Other-Pancreas,15_Quies-Digestive-Rectal_Mucosa.Donor_29,13_ReprPC-IMR90-IMR90_Cell_Line,15_Quies-Sm._Muscle-Duodenum_Smooth_Muscle,14_ReprPCWk-ENCODE2012-A549_EtOH_0.02pct_Lung_Carcinoma,14_ReprPCWk-Mesench-Bone_Marr…
chr11	34652965	34801895	pat_150	Gain	chr11	34732262	34732675	34732262	34732675	413	intergenic	EHF,APIP	Bird_HAR31	HAR_Merge50-00307	14_ReprPCWk-Neurosph-Neurosphere_Cultured_Cells_Ganglionic_Eminence_Derived,15_Quies-ES-deriv-hESC_Derived_CD56+_Mesoderm_Cultured_Cells,8_ZNF/Rpts-ES-deriv-hESC_Derived_CD184+_Endoderm_Cultured_Cells,15_Quies-Other-Pancreas,15_Quies-Digestive-Rectal_Mucosa.Donor_29,9_Het-Blood_&_T-cell-Peripheral_Blood_Mononuclear_Primary_Cells,5_TxWk-ES-deriv-hESC_Derived_CD56+_Ectoderm_Cultured_Cells,9_Het-Dig…
chr11	34652965	34801895	pat_150	Gain	chr11	34764291	34764409	34764291	34764409	118	intergenic	EHF,APIP	Bird_HAR554,Toh_HAR226	HAR_Merge50-00308	14_ReprPCWk-Neurosph-Neurosphere_Cultured_Cells_Ganglionic_Eminence_Derived,15_Quies-ES-deriv-hESC_Derived_CD56+_Mesoderm_Cultured_Cells,14_ReprPCWk-Muscle-Fetal_Muscle_Trunk,15_Quies-Other-Pancreas,14_ReprPCWk-ENCODE2012-Dnd41_TCell_Leukemia,15_Quies-Digestive-Rectal_Mucosa.Donor_29,5_TxWk-ES-deriv-hESC_Derived_CD56+_Ectoderm_Cultured_Cells,13_ReprPC-IMR90-IMR90_Cell_Line,15_Quies-Sm._Muscle-Duo…
chr11	35409630	35456131	pat_010	Gain	chr11	35446122	35446136	35446122	35446136	14	intergenic	SLC1A2,PAMR1	Toh_HAR109	HAR_Merge50-00309	14_ReprPCWk-Muscle-Fetal_Muscle_Trunk,14_ReprPCWk-Digestive-Colonic_Mucosa,14_ReprPCWk-HSC_&_B-cell-CD19_Primary_Cells_Peripheral_UW,15_Quies-Other-Pancreas,14_ReprPCWk-ENCODE2012-Dnd41_TCell_Leukemia,13_ReprPC-HSC_&_B-cell-CD14_Primary_Cells,5_TxWk-ES-deriv-hESC_Derived_CD56+_Ectoderm_Cultured_Cells,5_TxWk-Epithelial-Penis_Foreskin_Fibroblast_Primary_Cells_skin02,14_ReprPCWk-Heart-Left_Ventricle…	COMMD9
chr11	35636184	35754464	pat_010	Loss	chr11	35644714	35644994	35644714	35644994	280	intergenic	FJX1,TRIM44	Toh_HAR506,Prabhakar_HAR503	HAR_Merge50-00310	14_ReprPCWk-Digestive-Colonic_Mucosa,14_ReprPCWk-HSC_&_B-cell-CD19_Primary_Cells_Peripheral_UW,15_Quies-Other-Pancreas,14_ReprPCWk-ENCODE2012-Dnd41_TCell_Leukemia,13_ReprPC-Digestive-Rectal_Mucosa.Donor_29,13_ReprPC-HSC_&_B-cell-CD14_Primary_Cells,5_TxWk-ES-deriv-hESC_Derived_CD56+_Ectoderm_Cultured_Cells,13_ReprPC-Digestive-Rectal_Mucosa.Donor_31,15_Quies-Brain-Brain_Mid_Frontal_Lobe,13_ReprPC-H…	LDLRAD3
chr11	36090008	36111668	pat_010	Gain	chr11	36101849	36101983	36101849	36101983	134	intronic	LDLRAD3	Bird_HAR556	HAR_Merge50-00312	4_Tx-Muscle-Fetal_Muscle_Leg,14_ReprPCWk-ENCODE2012-Dnd41_TCell_Leukemia,15_Quies-Digestive-Rectal_Mucosa.Donor_29,5_TxWk-ES-deriv-hESC_Derived_CD56+_Ectoderm_Cultured_Cells,5_TxWk-Epithelial-Penis_Foreskin_Fibroblast_Primary_Cells_skin02,15_Quies-Brain-Brain_Mid_Frontal_Lobe,5_TxWk-Brain-Brain_Hippocampus_Middle,5_TxWk-HSC_&_B-cell-CD14_Primary_Cells,15_Quies-Sm._Muscle-Rectal_Smooth_Muscle,5_Tx…	LDLRAD3,PAMR1,TRIM44,FJX1
chr11	37016885	37023861	pat_151	Loss	chr11	37018052	37018362	37018052	37018362	310	intergenic	C11orf74,NONE	Prabhakar_HAR688	HAR_Merge50-00313	9_Het-Epithelial-Penis_Foreskin_Fibroblast_Primary_Cells_skin02,15_Quies-ES-deriv-hESC_Derived_CD56+_Mesoderm_Cultured_Cells,15_Quies-Other-Pancreas,15_Quies-Digestive-Rectal_Mucosa.Donor_29,15_Quies-Sm._Muscle-Duodenum_Smooth_Muscle,15_Quies-Other-Spleen,15_Quies-Brain-Brain_Mid_Frontal_Lobe,15_Quies-Sm._Muscle-Rectal_Smooth_Muscle,15_Quies-ENCODE2012-HeLa-S3_Cervical_Carcinoma,15_Quies-HSC_&_B-…
chr11	37016885	37023861	pat_152	Loss	chr11	37018052	37018362	37018052	37018362	310	intergenic	C11orf74,NONE	Prabhakar_HAR688	HAR_Merge50-00313	9_Het-Epithelial-Penis_Foreskin_Fibroblast_Primary_Cells_skin02,15_Quies-ES-deriv-hESC_Derived_CD56+_Mesoderm_Cultured_Cells,15_Quies-Other-Pancreas,15_Quies-Digestive-Rectal_Mucosa.Donor_29,15_Quies-Sm._Muscle-Duodenum_Smooth_Muscle,15_Quies-Other-Spleen,15_Quies-Brain-Brain_Mid_Frontal_Lobe,15_Quies-Sm._Muscle-Rectal_Smooth_Muscle,15_Quies-ENCODE2012-HeLa-S3_Cervical_Carcinoma,15_Quies-HSC_&_B-…
chr11	37018098	37023861	pat_153	Loss	chr11	37018052	37018362	37018098	37018362	264	intergenic	C11orf74,NONE	Prabhakar_HAR688	HAR_Merge50-00313	9_Het-Epithelial-Penis_Foreskin_Fibroblast_Primary_Cells_skin02,15_Quies-ES-deriv-hESC_Derived_CD56+_Mesoderm_Cultured_Cells,15_Quies-Other-Pancreas,15_Quies-Digestive-Rectal_Mucosa.Donor_29,15_Quies-Sm._Muscle-Duodenum_Smooth_Muscle,15_Quies-Other-Spleen,15_Quies-Brain-Brain_Mid_Frontal_Lobe,15_Quies-Sm._Muscle-Rectal_Smooth_Muscle,15_Quies-ENCODE2012-HeLa-S3_Cervical_Carcinoma,15_Quies-HSC_&_B-…
chr11	37018098	37023861	pat_154	Loss	chr11	37018052	37018362	37018098	37018362	264	intergenic	C11orf74,NONE	Prabhakar_HAR688	HAR_Merge50-00313	9_Het-Epithelial-Penis_Foreskin_Fibroblast_Primary_Cells_skin02,15_Quies-ES-deriv-hESC_Derived_CD56+_Mesoderm_Cultured_Cells,15_Quies-Other-Pancreas,15_Quies-Digestive-Rectal_Mucosa.Donor_29,15_Quies-Sm._Muscle-Duodenum_Smooth_Muscle,15_Quies-Other-Spleen,15_Quies-Brain-Brain_Mid_Frontal_Lobe,15_Quies-Sm._Muscle-Rectal_Smooth_Muscle,15_Quies-ENCODE2012-HeLa-S3_Cervical_Carcinoma,15_Quies-HSC_&_B-…
chr11	37018098	37023861	pat_155	Loss	chr11	37018052	37018362	37018098	37018362	264	intergenic	C11orf74,NONE	Prabhakar_HAR688	HAR_Merge50-00313	9_Het-Epithelial-Penis_Foreskin_Fibroblast_Primary_Cells_skin02,15_Quies-ES-deriv-hESC_Derived_CD56+_Mesoderm_Cultured_Cells,15_Quies-Other-Pancreas,15_Quies-Digestive-Rectal_Mucosa.Donor_29,15_Quies-Sm._Muscle-Duodenum_Smooth_Muscle,15_Quies-Other-Spleen,15_Quies-Brain-Brain_Mid_Frontal_Lobe,15_Quies-Sm._Muscle-Rectal_Smooth_Muscle,15_Quies-ENCODE2012-HeLa-S3_Cervical_Carcinoma,15_Quies-HSC_&_B-…
chr11	37018098	37030717	pat_010	Gain	chr11	37018052	37018362	37018098	37018362	264	intergenic	C11orf74,NONE	Prabhakar_HAR688	HAR_Merge50-00313	9_Het-Epithelial-Penis_Foreskin_Fibroblast_Primary_Cells_skin02,15_Quies-ES-deriv-hESC_Derived_CD56+_Mesoderm_Cultured_Cells,15_Quies-Other-Pancreas,15_Quies-Digestive-Rectal_Mucosa.Donor_29,15_Quies-Sm._Muscle-Duodenum_Smooth_Muscle,15_Quies-Other-Spleen,15_Quies-Brain-Brain_Mid_Frontal_Lobe,15_Quies-Sm._Muscle-Rectal_Smooth_Muscle,15_Quies-ENCODE2012-HeLa-S3_Cervical_Carcinoma,15_Quies-HSC_&_B-…
chr11	38477447	38567254	pat_010	Gain	chr11	38536109	38536301	38536109	38536301	192	intergenic	C11orf74,LRRC4C	Bird_HAR557	HAR_Merge50-00314	15_Quies-ES-deriv-hESC_Derived_CD56+_Mesoderm_Cultured_Cells,15_Quies-Other-Pancreas,15_Quies-Digestive-Rectal_Mucosa.Donor_29,15_Quies-Sm._Muscle-Duodenum_Smooth_Muscle,15_Quies-Other-Spleen,15_Quies-Brain-Brain_Mid_Frontal_Lobe,15_Quies-Sm._Muscle-Rectal_Smooth_Muscle,15_Quies-ENCODE2012-HeLa-S3_Cervical_Carcinoma,15_Quies-HSC_&_B-cell-CD14_Primary_Cells,15_Quies-iPSC-iPS-20b_Cell_Line,15_Quies…
chr11	39440831	39606428	pat_010	Loss	chr11	39575869	39576030	39575869	39576030	161	intergenic	NONE,LRRC4C	Bird_HAR558,Prabhakar_HAR331	HAR_Merge50-00315	15_Quies-ES-deriv-hESC_Derived_CD56+_Mesoderm_Cultured_Cells,15_Quies-Other-Pancreas,9_Het-Digestive-Rectal_Mucosa.Donor_29,15_Quies-Sm._Muscle-Duodenum_Smooth_Muscle,15_Quies-Other-Spleen,15_Quies-Brain-Brain_Mid_Frontal_Lobe,15_Quies-Sm._Muscle-Rectal_Smooth_Muscle,15_Quies-ENCODE2012-HeLa-S3_Cervical_Carcinoma,15_Quies-HSC_&_B-cell-CD14_Primary_Cells,15_Quies-iPSC-iPS-20b_Cell_Line,15_Quies-HS…
chr11	42032484	42079837	pat_010	Loss	chr11	42071022	42071245	42071022	42071245	223	intergenic	LRRC4C,LOC100507205	Prabhakar_HAR606	HAR_Merge50-00317	15_Quies-ES-deriv-hESC_Derived_CD56+_Mesoderm_Cultured_Cells,15_Quies-Other-Pancreas,15_Quies-Digestive-Rectal_Mucosa.Donor_29,15_Quies-Sm._Muscle-Duodenum_Smooth_Muscle,15_Quies-Other-Spleen,15_Quies-Brain-Brain_Mid_Frontal_Lobe,15_Quies-Sm._Muscle-Rectal_Smooth_Muscle,15_Quies-ENCODE2012-HeLa-S3_Cervical_Carcinoma,15_Quies-HSC_&_B-cell-CD14_Primary_Cells,15_Quies-iPSC-iPS-20b_Cell_Line,15_Quies…
chr11	42345325	42458632	pat_010	Gain	chr11	42377295	42377522	42377295	42377522	227	intergenic	LOC100507205,HNRNPKP3	Toh_HAR466	HAR_Merge50-00318	15_Quies-ES-deriv-hESC_Derived_CD56+_Mesoderm_Cultured_Cells,15_Quies-Other-Pancreas,15_Quies-Digestive-Rectal_Mucosa.Donor_29,15_Quies-Sm._Muscle-Duodenum_Smooth_Muscle,15_Quies-Other-Spleen,15_Quies-Brain-Brain_Mid_Frontal_Lobe,15_Quies-Sm._Muscle-Rectal_Smooth_Muscle,15_Quies-ENCODE2012-HeLa-S3_Cervical_Carcinoma,15_Quies-HSC_&_B-cell-CD14_Primary_Cells,15_Quies-iPSC-iPS-20b_Cell_Line,15_Quies…
chr11	42375307	42394796	pat_156	Loss	chr11	42377295	42377522	42377295	42377522	227	intergenic	LOC100507205,HNRNPKP3	Toh_HAR466	HAR_Merge50-00318	15_Quies-ES-deriv-hESC_Derived_CD56+_Mesoderm_Cultured_Cells,15_Quies-Other-Pancreas,15_Quies-Digestive-Rectal_Mucosa.Donor_29,15_Quies-Sm._Muscle-Duodenum_Smooth_Muscle,15_Quies-Other-Spleen,15_Quies-Brain-Brain_Mid_Frontal_Lobe,15_Quies-Sm._Muscle-Rectal_Smooth_Muscle,15_Quies-ENCODE2012-HeLa-S3_Cervical_Carcinoma,15_Quies-HSC_&_B-cell-CD14_Primary_Cells,15_Quies-iPSC-iPS-20b_Cell_Line,15_Quies…
chr11	42589656	42640863	pat_010	Gain	chr11	42618379	42618711	42618379	42618711	332	intergenic	LOC100507205,HNRNPKP3	Bird_HAR560	HAR_Merge50-00320	9_Het-Epithelial-Penis_Foreskin_Fibroblast_Primary_Cells_skin02,15_Quies-ES-deriv-hESC_Derived_CD56+_Mesoderm_Cultured_Cells,15_Quies-Other-Pancreas,15_Quies-Digestive-Rectal_Mucosa.Donor_29,15_Quies-Sm._Muscle-Duodenum_Smooth_Muscle,15_Quies-Other-Spleen,15_Quies-Brain-Brain_Mid_Frontal_Lobe,15_Quies-Sm._Muscle-Rectal_Smooth_Muscle,15_Quies-ENCODE2012-HeLa-S3_Cervical_Carcinoma,15_Quies-HSC_&_B-…
chr11	43870005	44532322	pat_013	Gain	chr11	44436409	44436909	44436409	44436909	500	intergenic	ALX4,CD82	Bird_HAR561	HAR_Merge50-00321	14_ReprPCWk-Neurosph-Neurosphere_Cultured_Cells_Ganglionic_Eminence_Derived,15_Quies-ES-deriv-hESC_Derived_CD56+_Mesoderm_Cultured_Cells,14_ReprPCWk-HSC_&_B-cell-CD19_Primary_Cells_Peripheral_UW,15_Quies-Other-Pancreas,14_ReprPCWk-ENCODE2012-Dnd41_TCell_Leukemia,15_Quies-Other-Spleen,14_ReprPCWk-ENCODE2012-A549_EtOH_0.02pct_Lung_Carcinoma,15_Quies-Brain-Brain_Mid_Frontal_Lobe,14_ReprPCWk-Mesench-…
chr11	46837879	46966009	pat_010	Loss	chr11	46942192	46942212	46942192	46942212	20	intergenic	LRP4,C11orf49	Toh_HAR210	HAR_Merge50-00322	5_TxWk-Heart-Left_Ventricle,14_ReprPCWk-HSC_&_B-cell-CD19_Primary_Cells_Peripheral_UW,15_Quies-Other-Pancreas,5_TxWk-ES-deriv-hESC_Derived_CD56+_Ectoderm_Cultured_Cells,15_Quies-Other-Spleen,14_ReprPCWk-HSC_&_B-cell-CD14_Primary_Cells,7_Enh-Epithelial-Penis_Foreskin_Fibroblast_Primary_Cells_skin01,7_Enh-ENCODE2012-Osteoblasts,7_Enh-Muscle-Fetal_Muscle_Trunk,7_Enh-ENCODE2012-NH-A_Astrocytes,7_Enh-…	LRP4
chr11	47064769	47105163	pat_012	Gain	chr11	47091837	47091966	47091837	47091966	129	intronic	C11orf49	Prabhakar_HAR758	HAR_Merge50-00324	15_Quies-Sm._Muscle-Duodenum_Smooth_Muscle,15_Quies-Other-Spleen,5_TxWk-ENCODE2012-NH-A_Astrocytes,15_Quies-Brain-Brain_Mid_Frontal_Lobe,5_TxWk-Brain-Brain_Hippocampus_Middle,15_Quies-Sm._Muscle-Rectal_Smooth_Muscle,15_Quies-HSC_&_B-cell-CD14_Primary_Cells,15_Quies-HSC_&_B-cell-CD15_Primary_Cells,5_TxWk-Mesench-Adipose_Derived_Mesenchymal_Stem_Cell_Cultured_Cells,5_TxWk-Epithelial-Penis_Foreskin_…	LRP4,C11orf49
chr11	47088976	47105163	pat_010	Loss	chr11	47091837	47091966	47091837	47091966	129	intronic	C11orf49	Prabhakar_HAR758	HAR_Merge50-00324	15_Quies-Sm._Muscle-Duodenum_Smooth_Muscle,15_Quies-Other-Spleen,5_TxWk-ENCODE2012-NH-A_Astrocytes,15_Quies-Brain-Brain_Mid_Frontal_Lobe,5_TxWk-Brain-Brain_Hippocampus_Middle,15_Quies-Sm._Muscle-Rectal_Smooth_Muscle,15_Quies-HSC_&_B-cell-CD14_Primary_Cells,15_Quies-HSC_&_B-cell-CD15_Primary_Cells,5_TxWk-Mesench-Adipose_Derived_Mesenchymal_Stem_Cell_Cultured_Cells,5_TxWk-Epithelial-Penis_Foreskin_…	LRP4,C11orf49
chr11	49277973	49373470	pat_010	Loss	chr11	49339511	49339657	49339511	49339657	146	intergenic	FOLH1,LOC440040	Bird_HAR562	HAR_Merge50-00325	15_Quies-ES-deriv-hESC_Derived_CD56+_Mesoderm_Cultured_Cells,15_Quies-Other-Pancreas,15_Quies-Digestive-Rectal_Mucosa.Donor_29,15_Quies-Sm._Muscle-Duodenum_Smooth_Muscle,15_Quies-Other-Spleen,15_Quies-Brain-Brain_Mid_Frontal_Lobe,15_Quies-Sm._Muscle-Rectal_Smooth_Muscle,15_Quies-ENCODE2012-HeLa-S3_Cervical_Carcinoma,15_Quies-HSC_&_B-cell-CD14_Primary_Cells,15_Quies-iPSC-iPS-20b_Cell_Line,15_Quies…
chr11	49554916	49629624	pat_010	Gain	chr11	49598205	49598463	49598205	49598463	258	ncRNA_exonic	LOC440040	Bird_HAR80	HAR_Merge50-00326	15_Quies-Other-Pancreas,15_Quies-Digestive-Rectal_Mucosa.Donor_29,15_Quies-Sm._Muscle-Duodenum_Smooth_Muscle,15_Quies-Other-Spleen,15_Quies-Brain-Brain_Mid_Frontal_Lobe,15_Quies-Sm._Muscle-Rectal_Smooth_Muscle,9_Het-ESC-H9_Cell_Line,15_Quies-ENCODE2012-HeLa-S3_Cervical_Carcinoma,15_Quies-HSC_&_B-cell-CD15_Primary_Cells,9_Het-ESC-HUES64_Cell_Line,15_Quies-ESC-ES-WA7_Cell_Line,9_Het-iPSC-iPS-15b_Ce…
chr11	50013744	50596467	pat_092	Gain	chr11	50114819	50114945	50114819	50114945	126	intergenic	OR4C12,LOC441601	Bird_HAR424	HAR_Merge50-00327	9_Het-Epithelial-Penis_Foreskin_Fibroblast_Primary_Cells_skin02,15_Quies-Other-Pancreas,15_Quies-Digestive-Rectal_Mucosa.Donor_29,15_Quies-Sm._Muscle-Duodenum_Smooth_Muscle,15_Quies-Other-Spleen,15_Quies-Brain-Brain_Mid_Frontal_Lobe,15_Quies-Sm._Muscle-Rectal_Smooth_Muscle,9_Het-ESC-H9_Cell_Line,15_Quies-ENCODE2012-HeLa-S3_Cervical_Carcinoma,15_Quies-HSC_&_B-cell-CD14_Primary_Cells,15_Quies-HSC_&…
chr11	50036272	50213109	pat_010	Gain	chr11	50114819	50114945	50114819	50114945	126	intergenic	OR4C12,LOC441601	Bird_HAR424	HAR_Merge50-00327	9_Het-Epithelial-Penis_Foreskin_Fibroblast_Primary_Cells_skin02,15_Quies-Other-Pancreas,15_Quies-Digestive-Rectal_Mucosa.Donor_29,15_Quies-Sm._Muscle-Duodenum_Smooth_Muscle,15_Quies-Other-Spleen,15_Quies-Brain-Brain_Mid_Frontal_Lobe,15_Quies-Sm._Muscle-Rectal_Smooth_Muscle,9_Het-ESC-H9_Cell_Line,15_Quies-ENCODE2012-HeLa-S3_Cervical_Carcinoma,15_Quies-HSC_&_B-cell-CD14_Primary_Cells,15_Quies-HSC_&…
chr11	50063586	50573143	pat_119	Gain	chr11	50114819	50114945	50114819	50114945	126	intergenic	OR4C12,LOC441601	Bird_HAR424	HAR_Merge50-00327	9_Het-Epithelial-Penis_Foreskin_Fibroblast_Primary_Cells_skin02,15_Quies-Other-Pancreas,15_Quies-Digestive-Rectal_Mucosa.Donor_29,15_Quies-Sm._Muscle-Duodenum_Smooth_Muscle,15_Quies-Other-Spleen,15_Quies-Brain-Brain_Mid_Frontal_Lobe,15_Quies-Sm._Muscle-Rectal_Smooth_Muscle,9_Het-ESC-H9_Cell_Line,15_Quies-ENCODE2012-HeLa-S3_Cervical_Carcinoma,15_Quies-HSC_&_B-cell-CD14_Primary_Cells,15_Quies-HSC_&…
chr11	50063586	50596467	pat_157	Gain	chr11	50114819	50114945	50114819	50114945	126	intergenic	OR4C12,LOC441601	Bird_HAR424	HAR_Merge50-00327	9_Het-Epithelial-Penis_Foreskin_Fibroblast_Primary_Cells_skin02,15_Quies-Other-Pancreas,15_Quies-Digestive-Rectal_Mucosa.Donor_29,15_Quies-Sm._Muscle-Duodenum_Smooth_Muscle,15_Quies-Other-Spleen,15_Quies-Brain-Brain_Mid_Frontal_Lobe,15_Quies-Sm._Muscle-Rectal_Smooth_Muscle,9_Het-ESC-H9_Cell_Line,15_Quies-ENCODE2012-HeLa-S3_Cervical_Carcinoma,15_Quies-HSC_&_B-cell-CD14_Primary_Cells,15_Quies-HSC_&…
chr11	50063586	50596467	pat_158	Gain	chr11	50114819	50114945	50114819	50114945	126	intergenic	OR4C12,LOC441601	Bird_HAR424	HAR_Merge50-00327	9_Het-Epithelial-Penis_Foreskin_Fibroblast_Primary_Cells_skin02,15_Quies-Other-Pancreas,15_Quies-Digestive-Rectal_Mucosa.Donor_29,15_Quies-Sm._Muscle-Duodenum_Smooth_Muscle,15_Quies-Other-Spleen,15_Quies-Brain-Brain_Mid_Frontal_Lobe,15_Quies-Sm._Muscle-Rectal_Smooth_Muscle,9_Het-ESC-H9_Cell_Line,15_Quies-ENCODE2012-HeLa-S3_Cervical_Carcinoma,15_Quies-HSC_&_B-cell-CD14_Primary_Cells,15_Quies-HSC_&…
chr11	56118236	56139454	pat_010	Loss	chr11	56118895	56119339	56118895	56119339	444	intergenic	OR8K1,OR8J1	Bird_HAR185	HAR_Merge50-00328	15_Quies-ES-deriv-hESC_Derived_CD56+_Mesoderm_Cultured_Cells,15_Quies-Other-Pancreas,15_Quies-Digestive-Rectal_Mucosa.Donor_29,15_Quies-Sm._Muscle-Duodenum_Smooth_Muscle,15_Quies-Other-Spleen,15_Quies-Brain-Brain_Mid_Frontal_Lobe,15_Quies-Sm._Muscle-Rectal_Smooth_Muscle,15_Quies-ENCODE2012-HeLa-S3_Cervical_Carcinoma,15_Quies-HSC_&_B-cell-CD14_Primary_Cells,15_Quies-iPSC-iPS-20b_Cell_Line,15_Quies…
chr11	63643710	63964054	pat_159	Gain	chr11	63924912	63925246	63924912	63925246	334	intronic	MACROD1	Prabhakar_HAR283	HAR_Merge50-00329	15_Quies-ES-deriv-hESC_Derived_CD56+_Mesoderm_Cultured_Cells,5_TxWk-Digestive-Colonic_Mucosa,5_TxWk-Heart-Left_Ventricle,5_TxWk-Epithelial-Penis_Foreskin_Fibroblast_Primary_Cells_skin02,5_TxWk-Blood_&_T-cell-CD3_Primary_Cells_Cord_BI,15_Quies-HSC_&_B-cell-CD14_Primary_Cells,5_TxWk-Other-Spleen,15_Quies-HSC_&_B-cell-CD15_Primary_Cells,5_TxWk-Mesench-Adipose_Derived_Mesenchymal_Stem_Cell_Cultured_C…
chr11	63924393	63927939	pat_010	Gain	chr11	63924912	63925246	63924912	63925246	334	intronic	MACROD1	Prabhakar_HAR283	HAR_Merge50-00329	15_Quies-ES-deriv-hESC_Derived_CD56+_Mesoderm_Cultured_Cells,5_TxWk-Digestive-Colonic_Mucosa,5_TxWk-Heart-Left_Ventricle,5_TxWk-Epithelial-Penis_Foreskin_Fibroblast_Primary_Cells_skin02,5_TxWk-Blood_&_T-cell-CD3_Primary_Cells_Cord_BI,15_Quies-HSC_&_B-cell-CD14_Primary_Cells,5_TxWk-Other-Spleen,15_Quies-HSC_&_B-cell-CD15_Primary_Cells,5_TxWk-Mesench-Adipose_Derived_Mesenchymal_Stem_Cell_Cultured_C…
chr11	79245830	79376747	pat_009	Gain	chr11	79338429	79338665	79338429	79338665	236	intergenic	TENM4,NONE	BUSH_HAR11,Bird_HAR186	HAR_Merge50-00332	15_Quies-ES-deriv-hESC_Derived_CD56+_Mesoderm_Cultured_Cells,14_ReprPCWk-ENCODE2012-Dnd41_TCell_Leukemia,15_Quies-Other-Pancreas,15_Quies-Digestive-Rectal_Mucosa.Donor_29,15_Quies-Sm._Muscle-Duodenum_Smooth_Muscle,15_Quies-Other-Spleen,15_Quies-Brain-Brain_Mid_Frontal_Lobe,15_Quies-Sm._Muscle-Rectal_Smooth_Muscle,15_Quies-ENCODE2012-HeLa-S3_Cervical_Carcinoma,15_Quies-HSC_&_B-cell-CD14_Primary_Ce…
chr11	79726873	79812352	pat_010	Loss	chr11	79786055	79786290	79786055	79786290	235	intergenic	TENM4,MIR4300	Prabhakar_HAR233	HAR_Merge50-00334	15_Quies-ES-deriv-hESC_Derived_CD56+_Mesoderm_Cultured_Cells,15_Quies-Other-Pancreas,15_Quies-Digestive-Rectal_Mucosa.Donor_29,15_Quies-Sm._Muscle-Duodenum_Smooth_Muscle,15_Quies-Other-Spleen,15_Quies-Brain-Brain_Mid_Frontal_Lobe,15_Quies-Sm._Muscle-Rectal_Smooth_Muscle,15_Quies-ENCODE2012-HeLa-S3_Cervical_Carcinoma,7_Enh-Digestive-Stomach_Mucosa,15_Quies-HSC_&_B-cell-CD14_Primary_Cells,15_Quies-…
chr11	80982356	81037858	pat_010	Gain	chr11	81018201	81018406	81018201	81018406	205	intergenic	TENM4,MIR4300	Bird_HAR187	HAR_Merge50-00336	9_Het-Epithelial-Penis_Foreskin_Fibroblast_Primary_Cells_skin02,15_Quies-ES-deriv-hESC_Derived_CD56+_Mesoderm_Cultured_Cells,15_Quies-Other-Pancreas,15_Quies-Digestive-Rectal_Mucosa.Donor_29,15_Quies-Sm._Muscle-Duodenum_Smooth_Muscle,15_Quies-Other-Spleen,15_Quies-Brain-Brain_Mid_Frontal_Lobe,15_Quies-Sm._Muscle-Rectal_Smooth_Muscle,15_Quies-ENCODE2012-HeLa-S3_Cervical_Carcinoma,15_Quies-HSC_&_B-…
chr11	88413015	114971995	pat_160	Loss	chr11	89231856	89232323	89231856	89232323	467	intronic	NOX4	Bird_HAR567	HAR_Merge50-00339	15_Quies-ES-deriv-hESC_Derived_CD56+_Mesoderm_Cultured_Cells,15_Quies-Other-Pancreas,15_Quies-Digestive-Rectal_Mucosa.Donor_29,5_TxWk-ES-deriv-hESC_Derived_CD56+_Ectoderm_Cultured_Cells,15_Quies-Sm._Muscle-Duodenum_Smooth_Muscle,15_Quies-Other-Spleen,15_Quies-Brain-Brain_Mid_Frontal_Lobe,15_Quies-Sm._Muscle-Rectal_Smooth_Muscle,15_Quies-ENCODE2012-HeLa-S3_Cervical_Carcinoma,15_Quies-HSC_&_B-cell-…
chr11	88413015	114971995	pat_160	Loss	chr11	91579774	91580037	91579774	91580037	263	intergenic	DISC1FP1,FAT3	Prabhakar_HAR774	HAR_Merge50-00340	9_Het-Epithelial-Penis_Foreskin_Fibroblast_Primary_Cells_skin02,15_Quies-ES-deriv-hESC_Derived_CD56+_Mesoderm_Cultured_Cells,15_Quies-Other-Pancreas,15_Quies-Digestive-Rectal_Mucosa.Donor_29,15_Quies-Sm._Muscle-Duodenum_Smooth_Muscle,15_Quies-Other-Spleen,15_Quies-Brain-Brain_Mid_Frontal_Lobe,14_ReprPCWk-Mesench-Bone_Marrow_Derived_Mesenchymal_Stem_Cell_Cultured_Cells,15_Quies-Sm._Muscle-Rectal_S…
chr11	88413015	114971995	pat_160	Loss	chr11	91820828	91820865	91820828	91820865	37	intergenic	DISC1FP1,FAT3	Toh_HAR184	HAR_Merge50-00341	15_Quies-ES-deriv-hESC_Derived_CD56+_Mesoderm_Cultured_Cells,15_Quies-Other-Pancreas,15_Quies-Digestive-Rectal_Mucosa.Donor_29,15_Quies-Sm._Muscle-Duodenum_Smooth_Muscle,15_Quies-Other-Spleen,15_Quies-Brain-Brain_Mid_Frontal_Lobe,15_Quies-Sm._Muscle-Rectal_Smooth_Muscle,15_Quies-ENCODE2012-HeLa-S3_Cervical_Carcinoma,15_Quies-iPSC-iPS-20b_Cell_Line,15_Quies-HSC_&_B-cell-CD15_Primary_Cells,15_Quies…
chr11	88413015	114971995	pat_160	Loss	chr11	92340691	92340857	92340691	92340857	166	intronic	FAT3	Bird_HAR568	HAR_Merge50-00342	15_Quies-ES-deriv-hESC_Derived_CD56+_Mesoderm_Cultured_Cells,15_Quies-Other-Pancreas,15_Quies-Digestive-Rectal_Mucosa.Donor_29,15_Quies-Sm._Muscle-Duodenum_Smooth_Muscle,15_Quies-Other-Spleen,15_Quies-Brain-Brain_Mid_Frontal_Lobe,15_Quies-Sm._Muscle-Rectal_Smooth_Muscle,15_Quies-ENCODE2012-HeLa-S3_Cervical_Carcinoma,15_Quies-HSC_&_B-cell-CD14_Primary_Cells,15_Quies-iPSC-iPS-20b_Cell_Line,15_Quies…	SLC36A4
chr11	88413015	114971995	pat_160	Loss	chr11	95015617	95015966	95015617	95015966	349	intergenic	SESN3,FAM76B	Bird_HAR569	HAR_Merge50-00343	7_Enh-HSC_&_B-cell-CD15_Primary_Cells,15_Quies-Other-Pancreas,14_ReprPCWk-ENCODE2012-Dnd41_TCell_Leukemia,15_Quies-Digestive-Rectal_Mucosa.Donor_29,7_Enh-Other-Adult_Liver,2_TssAFlnk-Sm._Muscle-Stomach_Smooth_Muscle,15_Quies-Sm._Muscle-Duodenum_Smooth_Muscle,15_Quies-Other-Spleen,15_Quies-Brain-Brain_Mid_Frontal_Lobe,15_Quies-Sm._Muscle-Rectal_Smooth_Muscle,5_TxWk-Epithelial-Penis_Foreskin_Kerati…
chr11	88413015	114971995	pat_160	Loss	chr11	96028302	96028500	96028302	96028500	198	intronic	MAML2	Bird_HAR570	HAR_Merge50-00344	5_TxWk-HSC_&_B-cell-CD19_Primary_Cells_Peripheral_UW,5_TxWk-Digestive-Colonic_Mucosa,5_TxWk-Heart-Left_Ventricle,15_Quies-Other-Pancreas,5_TxWk-Epithelial-Penis_Foreskin_Fibroblast_Primary_Cells_skin02,15_Quies-Other-Spleen,5_TxWk-HSC_&_B-cell-CD14_Primary_Cells,15_Quies-Sm._Muscle-Rectal_Smooth_Muscle,15_Quies-ENCODE2012-HeLa-S3_Cervical_Carcinoma,15_Quies-HSC_&_B-cell-CD15_Primary_Cells,7_Enh-E…
chr11	88413015	114971995	pat_160	Loss	chr11	96831551	96831919	96831551	96831919	368	intergenic	JRKL-AS1,CNTN5	Bird_HAR571,Prabhakar_HAR721	HAR_Merge50-00345	15_Quies-ES-deriv-hESC_Derived_CD56+_Mesoderm_Cultured_Cells,15_Quies-Other-Pancreas,15_Quies-Digestive-Rectal_Mucosa.Donor_29,15_Quies-Sm._Muscle-Duodenum_Smooth_Muscle,15_Quies-Other-Spleen,15_Quies-Brain-Brain_Mid_Frontal_Lobe,15_Quies-Sm._Muscle-Rectal_Smooth_Muscle,15_Quies-ENCODE2012-HeLa-S3_Cervical_Carcinoma,15_Quies-HSC_&_B-cell-CD14_Primary_Cells,15_Quies-iPSC-iPS-20b_Cell_Line,15_Quies…
chr11	88413015	114971995	pat_160	Loss	chr11	97457165	97457523	97457165	97457523	358	intergenic	JRKL-AS1,CNTN5	Bird_HAR81	HAR_Merge50-00346	9_Het-Brain-Fetal_Brain_Male,15_Quies-ES-deriv-hESC_Derived_CD56+_Mesoderm_Cultured_Cells,8_ZNF/Rpts-ES-deriv-hESC_Derived_CD184+_Endoderm_Cultured_Cells,15_Quies-Other-Pancreas,15_Quies-Digestive-Rectal_Mucosa.Donor_29,15_Quies-Other-Spleen,15_Quies-Brain-Brain_Mid_Frontal_Lobe,15_Quies-Sm._Muscle-Rectal_Smooth_Muscle,15_Quies-ENCODE2012-HeLa-S3_Cervical_Carcinoma,9_Het-ESC-ES-I3_Cell_Line,15_Qu…
chr11	88413015	114971995	pat_160	Loss	chr11	98524353	98524656	98524353	98524656	303	intergenic	NONE,CNTN5	Bird_HAR82	HAR_Merge50-00347	15_Quies-ES-deriv-hESC_Derived_CD56+_Mesoderm_Cultured_Cells,15_Quies-Other-Pancreas,15_Quies-Digestive-Rectal_Mucosa.Donor_29,15_Quies-Sm._Muscle-Duodenum_Smooth_Muscle,15_Quies-Other-Spleen,15_Quies-Brain-Brain_Mid_Frontal_Lobe,15_Quies-Sm._Muscle-Rectal_Smooth_Muscle,15_Quies-ENCODE2012-HeLa-S3_Cervical_Carcinoma,15_Quies-HSC_&_B-cell-CD14_Primary_Cells,15_Quies-iPSC-iPS-20b_Cell_Line,15_Quies…
chr11	88413015	114971995	pat_160	Loss	chr11	100447375	100447660	100447375	100447660	285	intergenic	CNTN5,ARHGAP42	Prabhakar_HAR775	HAR_Merge50-00348	15_Quies-ES-deriv-hESC_Derived_CD56+_Mesoderm_Cultured_Cells,14_ReprPCWk-HSC_&_B-cell-CD19_Primary_Cells_Peripheral_UW,14_ReprPCWk-ENCODE2012-Dnd41_TCell_Leukemia,15_Quies-Other-Pancreas,15_Quies-Digestive-Rectal_Mucosa.Donor_29,7_Enh-Other-Adult_Liver,15_Quies-Sm._Muscle-Duodenum_Smooth_Muscle,14_ReprPCWk-ENCODE2012-A549_EtOH_0.02pct_Lung_Carcinoma,15_Quies-Other-Spleen,15_Quies-Brain-Brain_Mid_…
chr11	88413015	114971995	pat_160	Loss	chr11	109297851	109298156	109297851	109298156	305	UTR3	C11orf87	Bird_HAR39	HAR_Merge50-00349	15_Quies-ES-deriv-hESC_Derived_CD56+_Mesoderm_Cultured_Cells,15_Quies-Other-Pancreas,15_Quies-Digestive-Rectal_Mucosa.Donor_29,14_ReprPCWk-ENCODE2012-A549_EtOH_0.02pct_Lung_Carcinoma,15_Quies-Other-Spleen,15_Quies-Sm._Muscle-Rectal_Smooth_Muscle,15_Quies-ENCODE2012-HeLa-S3_Cervical_Carcinoma,14_ReprPCWk-Heart-Left_Ventricle,14_ReprPCWk-HSC_&_B-cell-CD14_Primary_Cells,14_ReprPCWk-Digestive-Sigmoid…
chr11	88413015	114971995	pat_160	Loss	chr11	109403875	109404155	109403875	109404155	280	intergenic	C11orf87,ZC3H12C	Bird_HAR533,Prabhakar_HAR759	HAR_Merge50-00350	15_Quies-ES-deriv-hESC_Derived_CD56+_Mesoderm_Cultured_Cells,15_Quies-Other-Pancreas,15_Quies-Digestive-Rectal_Mucosa.Donor_29,15_Quies-Sm._Muscle-Duodenum_Smooth_Muscle,15_Quies-Other-Spleen,15_Quies-Brain-Brain_Mid_Frontal_Lobe,15_Quies-Sm._Muscle-Rectal_Smooth_Muscle,15_Quies-ENCODE2012-HeLa-S3_Cervical_Carcinoma,15_Quies-HSC_&_B-cell-CD14_Primary_Cells,15_Quies-iPSC-iPS-20b_Cell_Line,15_Quies…
chr11	88413015	114971995	pat_160	Loss	chr11	110951765	110952083	110951765	110952083	318	intergenic	ARHGAP20,C11orf53	Prabhakar_HAR790	HAR_Merge50-00351	15_Quies-ES-deriv-hESC_Derived_CD56+_Mesoderm_Cultured_Cells,14_ReprPCWk-ENCODE2012-Dnd41_TCell_Leukemia,15_Quies-Other-Pancreas,15_Quies-Digestive-Rectal_Mucosa.Donor_29,15_Quies-Other-Spleen,15_Quies-Brain-Brain_Mid_Frontal_Lobe,14_ReprPCWk-Mesench-Bone_Marrow_Derived_Mesenchymal_Stem_Cell_Cultured_Cells,15_Quies-ENCODE2012-HeLa-S3_Cervical_Carcinoma,15_Quies-HSC_&_B-cell-CD14_Primary_Cells,15_…	PPP2R1B
chr11	88413015	114971995	pat_160	Loss	chr11	111309790	111309991	111309790	111309991	201	intergenic	LOC100132078,BTG4	Prabhakar_HAR491	HAR_Merge50-00352	14_ReprPCWk-Neurosph-Neurosphere_Cultured_Cells_Ganglionic_Eminence_Derived,15_Quies-ES-deriv-hESC_Derived_CD56+_Mesoderm_Cultured_Cells,14_ReprPCWk-Muscle-Fetal_Muscle_Trunk,5_TxWk-ES-deriv-hESC_Derived_CD56+_Ectoderm_Cultured_Cells,15_Quies-Brain-Brain_Mid_Frontal_Lobe,14_ReprPCWk-Mesench-Bone_Marrow_Derived_Mesenchymal_Stem_Cell_Cultured_Cells,15_Quies-HSC_&_B-cell-CD14_Primary_Cells,5_TxWk-Ot…	ALG9,C11orf1,FDXACB1
chr11	88413015	114971995	pat_160	Loss	chr11	112781754	112782166	112781754	112782166	412	intergenic	LOC387810,NCAM1	Bird_HAR534	HAR_Merge50-00353	14_ReprPCWk-Neurosph-Neurosphere_Cultured_Cells_Ganglionic_Eminence_Derived,14_ReprPCWk-ENCODE2012-Dnd41_TCell_Leukemia,15_Quies-Other-Pancreas,15_Quies-Sm._Muscle-Duodenum_Smooth_Muscle,15_Quies-Other-Spleen,14_ReprPCWk-ENCODE2012-A549_EtOH_0.02pct_Lung_Carcinoma,15_Quies-Brain-Brain_Mid_Frontal_Lobe,15_Quies-Sm._Muscle-Rectal_Smooth_Muscle,15_Quies-HSC_&_B-cell-CD14_Primary_Cells,15_Quies-iPSC-…
chr11	88413015	114971995	pat_160	Loss	chr11	112944247	112944430	112944247	112944430	183	intronic	NCAM1	Prabhakar_HAR872	HAR_Merge50-00354	15_Quies-ES-deriv-hESC_Derived_CD56+_Mesoderm_Cultured_Cells,5_TxWk-Heart-Left_Ventricle,15_Quies-Other-Pancreas,14_ReprPCWk-ENCODE2012-Dnd41_TCell_Leukemia,15_Quies-Digestive-Rectal_Mucosa.Donor_29,15_Quies-Sm._Muscle-Duodenum_Smooth_Muscle,14_ReprPCWk-ENCODE2012-A549_EtOH_0.02pct_Lung_Carcinoma,15_Quies-Other-Spleen,5_TxWk-Brain-Brain_Hippocampus_Middle,15_Quies-ENCODE2012-HeLa-S3_Cervical_Carc…
chr11	88413015	114971995	pat_160	Loss	chr11	114014953	114015219	114014953	114015219	266	intronic	ZBTB16	Bird_HAR535	HAR_Merge50-00355	7_Enh-Heart-Aorta,7_Enh-Digestive-Esophagus,2_TssAFlnk-Epithelial-Penis_Foreskin_Fibroblast_Primary_Cells_skin01,7_Enh-Other-Adult_Liver,13_ReprPC-IMR90-IMR90_Cell_Line,2_TssAFlnk-Sm._Muscle-Stomach_Smooth_Muscle,14_ReprPCWk-ENCODE2012-A549_EtOH_0.02pct_Lung_Carcinoma,5_TxWk-HSC_&_B-cell-CD14_Primary_Cells,7_Enh-Digestive-Stomach_Mucosa,14_ReprPCWk-Epithelial-Penis_Foreskin_Keratinocyte_Primary_C…
chr11	88413015	114971995	pat_160	Loss	chr11	114099764	114100193	114099764	114100193	429	intronic	ZBTB16	BUSH_HAR46,Pollard_HAR40,Bird_HAR180,Toh_HAR230	HAR_Merge50-00356	15_Quies-ES-deriv-hESC_Derived_CD56+_Mesoderm_Cultured_Cells,14_ReprPCWk-Muscle-Fetal_Muscle_Trunk,5_TxWk-Heart-Left_Ventricle,14_ReprPCWk-ENCODE2012-Dnd41_TCell_Leukemia,13_ReprPC-IMR90-IMR90_Cell_Line,2_TssAFlnk-Sm._Muscle-Stomach_Smooth_Muscle,14_ReprPCWk-ENCODE2012-A549_EtOH_0.02pct_Lung_Carcinoma,14_ReprPCWk-Mesench-Bone_Marrow_Derived_Mesenchymal_Stem_Cell_Cultured_Cells,15_Quies-HSC_&_B-ce…	USP28
chr11	88413015	114971995	pat_160	Loss	chr11	114799193	114799383	114799193	114799383	190	intergenic	NXPE2,CADM1	Pollard_HAR181	HAR_Merge50-00357	9_Het-Epithelial-Penis_Foreskin_Fibroblast_Primary_Cells_skin02,14_ReprPCWk-Neurosph-Neurosphere_Cultured_Cells_Ganglionic_Eminence_Derived,15_Quies-ES-deriv-hESC_Derived_CD56+_Mesoderm_Cultured_Cells,14_ReprPCWk-Digestive-Colonic_Mucosa,14_ReprPCWk-Muscle-Fetal_Muscle_Trunk,15_Quies-Other-Pancreas,15_Quies-Sm._Muscle-Duodenum_Smooth_Muscle,14_ReprPCWk-ENCODE2012-A549_EtOH_0.02pct_Lung_Carcinoma,…
chr11	89216182	89264048	pat_010	Loss	chr11	89231856	89232323	89231856	89232323	467	intronic	NOX4	Bird_HAR567	HAR_Merge50-00339	15_Quies-ES-deriv-hESC_Derived_CD56+_Mesoderm_Cultured_Cells,15_Quies-Other-Pancreas,15_Quies-Digestive-Rectal_Mucosa.Donor_29,5_TxWk-ES-deriv-hESC_Derived_CD56+_Ectoderm_Cultured_Cells,15_Quies-Sm._Muscle-Duodenum_Smooth_Muscle,15_Quies-Other-Spleen,15_Quies-Brain-Brain_Mid_Frontal_Lobe,15_Quies-Sm._Muscle-Rectal_Smooth_Muscle,15_Quies-ENCODE2012-HeLa-S3_Cervical_Carcinoma,15_Quies-HSC_&_B-cell-…
chr11	89228583	89232161	pat_161	Loss	chr11	89231856	89232323	89231856	89232161	305	intronic	NOX4	Bird_HAR567	HAR_Merge50-00339	15_Quies-ES-deriv-hESC_Derived_CD56+_Mesoderm_Cultured_Cells,15_Quies-Other-Pancreas,15_Quies-Digestive-Rectal_Mucosa.Donor_29,5_TxWk-ES-deriv-hESC_Derived_CD56+_Ectoderm_Cultured_Cells,15_Quies-Sm._Muscle-Duodenum_Smooth_Muscle,15_Quies-Other-Spleen,15_Quies-Brain-Brain_Mid_Frontal_Lobe,15_Quies-Sm._Muscle-Rectal_Smooth_Muscle,15_Quies-ENCODE2012-HeLa-S3_Cervical_Carcinoma,15_Quies-HSC_&_B-cell-…
chr11	91814469	91834246	pat_010	Gain	chr11	91820828	91820865	91820828	91820865	37	intergenic	DISC1FP1,FAT3	Toh_HAR184	HAR_Merge50-00341	15_Quies-ES-deriv-hESC_Derived_CD56+_Mesoderm_Cultured_Cells,15_Quies-Other-Pancreas,15_Quies-Digestive-Rectal_Mucosa.Donor_29,15_Quies-Sm._Muscle-Duodenum_Smooth_Muscle,15_Quies-Other-Spleen,15_Quies-Brain-Brain_Mid_Frontal_Lobe,15_Quies-Sm._Muscle-Rectal_Smooth_Muscle,15_Quies-ENCODE2012-HeLa-S3_Cervical_Carcinoma,15_Quies-iPSC-iPS-20b_Cell_Line,15_Quies-HSC_&_B-cell-CD15_Primary_Cells,15_Quies…
chr11	92333361	92342384	pat_010	Loss	chr11	92340691	92340857	92340691	92340857	166	intronic	FAT3	Bird_HAR568	HAR_Merge50-00342	15_Quies-ES-deriv-hESC_Derived_CD56+_Mesoderm_Cultured_Cells,15_Quies-Other-Pancreas,15_Quies-Digestive-Rectal_Mucosa.Donor_29,15_Quies-Sm._Muscle-Duodenum_Smooth_Muscle,15_Quies-Other-Spleen,15_Quies-Brain-Brain_Mid_Frontal_Lobe,15_Quies-Sm._Muscle-Rectal_Smooth_Muscle,15_Quies-ENCODE2012-HeLa-S3_Cervical_Carcinoma,15_Quies-HSC_&_B-cell-CD14_Primary_Cells,15_Quies-iPSC-iPS-20b_Cell_Line,15_Quies…	SLC36A4
chr11	92338667	92346838	pat_143	Loss	chr11	92340691	92340857	92340691	92340857	166	intronic	FAT3	Bird_HAR568	HAR_Merge50-00342	15_Quies-ES-deriv-hESC_Derived_CD56+_Mesoderm_Cultured_Cells,15_Quies-Other-Pancreas,15_Quies-Digestive-Rectal_Mucosa.Donor_29,15_Quies-Sm._Muscle-Duodenum_Smooth_Muscle,15_Quies-Other-Spleen,15_Quies-Brain-Brain_Mid_Frontal_Lobe,15_Quies-Sm._Muscle-Rectal_Smooth_Muscle,15_Quies-ENCODE2012-HeLa-S3_Cervical_Carcinoma,15_Quies-HSC_&_B-cell-CD14_Primary_Cells,15_Quies-iPSC-iPS-20b_Cell_Line,15_Quies…	SLC36A4
chr11	93219941	120976413	pat_162	Gain	chr11	95015617	95015966	95015617	95015966	349	intergenic	SESN3,FAM76B	Bird_HAR569	HAR_Merge50-00343	7_Enh-HSC_&_B-cell-CD15_Primary_Cells,15_Quies-Other-Pancreas,14_ReprPCWk-ENCODE2012-Dnd41_TCell_Leukemia,15_Quies-Digestive-Rectal_Mucosa.Donor_29,7_Enh-Other-Adult_Liver,2_TssAFlnk-Sm._Muscle-Stomach_Smooth_Muscle,15_Quies-Sm._Muscle-Duodenum_Smooth_Muscle,15_Quies-Other-Spleen,15_Quies-Brain-Brain_Mid_Frontal_Lobe,15_Quies-Sm._Muscle-Rectal_Smooth_Muscle,5_TxWk-Epithelial-Penis_Foreskin_Kerati…
chr11	93219941	120976413	pat_162	Gain	chr11	96028302	96028500	96028302	96028500	198	intronic	MAML2	Bird_HAR570	HAR_Merge50-00344	5_TxWk-HSC_&_B-cell-CD19_Primary_Cells_Peripheral_UW,5_TxWk-Digestive-Colonic_Mucosa,5_TxWk-Heart-Left_Ventricle,15_Quies-Other-Pancreas,5_TxWk-Epithelial-Penis_Foreskin_Fibroblast_Primary_Cells_skin02,15_Quies-Other-Spleen,5_TxWk-HSC_&_B-cell-CD14_Primary_Cells,15_Quies-Sm._Muscle-Rectal_Smooth_Muscle,15_Quies-ENCODE2012-HeLa-S3_Cervical_Carcinoma,15_Quies-HSC_&_B-cell-CD15_Primary_Cells,7_Enh-E…
chr11	93219941	120976413	pat_162	Gain	chr11	96831551	96831919	96831551	96831919	368	intergenic	JRKL-AS1,CNTN5	Bird_HAR571,Prabhakar_HAR721	HAR_Merge50-00345	15_Quies-ES-deriv-hESC_Derived_CD56+_Mesoderm_Cultured_Cells,15_Quies-Other-Pancreas,15_Quies-Digestive-Rectal_Mucosa.Donor_29,15_Quies-Sm._Muscle-Duodenum_Smooth_Muscle,15_Quies-Other-Spleen,15_Quies-Brain-Brain_Mid_Frontal_Lobe,15_Quies-Sm._Muscle-Rectal_Smooth_Muscle,15_Quies-ENCODE2012-HeLa-S3_Cervical_Carcinoma,15_Quies-HSC_&_B-cell-CD14_Primary_Cells,15_Quies-iPSC-iPS-20b_Cell_Line,15_Quies…
chr11	93219941	120976413	pat_162	Gain	chr11	97457165	97457523	97457165	97457523	358	intergenic	JRKL-AS1,CNTN5	Bird_HAR81	HAR_Merge50-00346	9_Het-Brain-Fetal_Brain_Male,15_Quies-ES-deriv-hESC_Derived_CD56+_Mesoderm_Cultured_Cells,8_ZNF/Rpts-ES-deriv-hESC_Derived_CD184+_Endoderm_Cultured_Cells,15_Quies-Other-Pancreas,15_Quies-Digestive-Rectal_Mucosa.Donor_29,15_Quies-Other-Spleen,15_Quies-Brain-Brain_Mid_Frontal_Lobe,15_Quies-Sm._Muscle-Rectal_Smooth_Muscle,15_Quies-ENCODE2012-HeLa-S3_Cervical_Carcinoma,9_Het-ESC-ES-I3_Cell_Line,15_Qu…
chr11	93219941	120976413	pat_162	Gain	chr11	98524353	98524656	98524353	98524656	303	intergenic	NONE,CNTN5	Bird_HAR82	HAR_Merge50-00347	15_Quies-ES-deriv-hESC_Derived_CD56+_Mesoderm_Cultured_Cells,15_Quies-Other-Pancreas,15_Quies-Digestive-Rectal_Mucosa.Donor_29,15_Quies-Sm._Muscle-Duodenum_Smooth_Muscle,15_Quies-Other-Spleen,15_Quies-Brain-Brain_Mid_Frontal_Lobe,15_Quies-Sm._Muscle-Rectal_Smooth_Muscle,15_Quies-ENCODE2012-HeLa-S3_Cervical_Carcinoma,15_Quies-HSC_&_B-cell-CD14_Primary_Cells,15_Quies-iPSC-iPS-20b_Cell_Line,15_Quies…
chr11	93219941	120976413	pat_162	Gain	chr11	100447375	100447660	100447375	100447660	285	intergenic	CNTN5,ARHGAP42	Prabhakar_HAR775	HAR_Merge50-00348	15_Quies-ES-deriv-hESC_Derived_CD56+_Mesoderm_Cultured_Cells,14_ReprPCWk-HSC_&_B-cell-CD19_Primary_Cells_Peripheral_UW,14_ReprPCWk-ENCODE2012-Dnd41_TCell_Leukemia,15_Quies-Other-Pancreas,15_Quies-Digestive-Rectal_Mucosa.Donor_29,7_Enh-Other-Adult_Liver,15_Quies-Sm._Muscle-Duodenum_Smooth_Muscle,14_ReprPCWk-ENCODE2012-A549_EtOH_0.02pct_Lung_Carcinoma,15_Quies-Other-Spleen,15_Quies-Brain-Brain_Mid_…
chr11	93219941	120976413	pat_162	Gain	chr11	109297851	109298156	109297851	109298156	305	UTR3	C11orf87	Bird_HAR39	HAR_Merge50-00349	15_Quies-ES-deriv-hESC_Derived_CD56+_Mesoderm_Cultured_Cells,15_Quies-Other-Pancreas,15_Quies-Digestive-Rectal_Mucosa.Donor_29,14_ReprPCWk-ENCODE2012-A549_EtOH_0.02pct_Lung_Carcinoma,15_Quies-Other-Spleen,15_Quies-Sm._Muscle-Rectal_Smooth_Muscle,15_Quies-ENCODE2012-HeLa-S3_Cervical_Carcinoma,14_ReprPCWk-Heart-Left_Ventricle,14_ReprPCWk-HSC_&_B-cell-CD14_Primary_Cells,14_ReprPCWk-Digestive-Sigmoid…
chr11	93219941	120976413	pat_162	Gain	chr11	109403875	109404155	109403875	109404155	280	intergenic	C11orf87,ZC3H12C	Bird_HAR533,Prabhakar_HAR759	HAR_Merge50-00350	15_Quies-ES-deriv-hESC_Derived_CD56+_Mesoderm_Cultured_Cells,15_Quies-Other-Pancreas,15_Quies-Digestive-Rectal_Mucosa.Donor_29,15_Quies-Sm._Muscle-Duodenum_Smooth_Muscle,15_Quies-Other-Spleen,15_Quies-Brain-Brain_Mid_Frontal_Lobe,15_Quies-Sm._Muscle-Rectal_Smooth_Muscle,15_Quies-ENCODE2012-HeLa-S3_Cervical_Carcinoma,15_Quies-HSC_&_B-cell-CD14_Primary_Cells,15_Quies-iPSC-iPS-20b_Cell_Line,15_Quies…
chr11	93219941	120976413	pat_162	Gain	chr11	110951765	110952083	110951765	110952083	318	intergenic	ARHGAP20,C11orf53	Prabhakar_HAR790	HAR_Merge50-00351	15_Quies-ES-deriv-hESC_Derived_CD56+_Mesoderm_Cultured_Cells,14_ReprPCWk-ENCODE2012-Dnd41_TCell_Leukemia,15_Quies-Other-Pancreas,15_Quies-Digestive-Rectal_Mucosa.Donor_29,15_Quies-Other-Spleen,15_Quies-Brain-Brain_Mid_Frontal_Lobe,14_ReprPCWk-Mesench-Bone_Marrow_Derived_Mesenchymal_Stem_Cell_Cultured_Cells,15_Quies-ENCODE2012-HeLa-S3_Cervical_Carcinoma,15_Quies-HSC_&_B-cell-CD14_Primary_Cells,15_…	PPP2R1B
chr11	93219941	120976413	pat_162	Gain	chr11	111309790	111309991	111309790	111309991	201	intergenic	LOC100132078,BTG4	Prabhakar_HAR491	HAR_Merge50-00352	14_ReprPCWk-Neurosph-Neurosphere_Cultured_Cells_Ganglionic_Eminence_Derived,15_Quies-ES-deriv-hESC_Derived_CD56+_Mesoderm_Cultured_Cells,14_ReprPCWk-Muscle-Fetal_Muscle_Trunk,5_TxWk-ES-deriv-hESC_Derived_CD56+_Ectoderm_Cultured_Cells,15_Quies-Brain-Brain_Mid_Frontal_Lobe,14_ReprPCWk-Mesench-Bone_Marrow_Derived_Mesenchymal_Stem_Cell_Cultured_Cells,15_Quies-HSC_&_B-cell-CD14_Primary_Cells,5_TxWk-Ot…	ALG9,C11orf1,FDXACB1
chr11	93219941	120976413	pat_162	Gain	chr11	112781754	112782166	112781754	112782166	412	intergenic	LOC387810,NCAM1	Bird_HAR534	HAR_Merge50-00353	14_ReprPCWk-Neurosph-Neurosphere_Cultured_Cells_Ganglionic_Eminence_Derived,14_ReprPCWk-ENCODE2012-Dnd41_TCell_Leukemia,15_Quies-Other-Pancreas,15_Quies-Sm._Muscle-Duodenum_Smooth_Muscle,15_Quies-Other-Spleen,14_ReprPCWk-ENCODE2012-A549_EtOH_0.02pct_Lung_Carcinoma,15_Quies-Brain-Brain_Mid_Frontal_Lobe,15_Quies-Sm._Muscle-Rectal_Smooth_Muscle,15_Quies-HSC_&_B-cell-CD14_Primary_Cells,15_Quies-iPSC-…
chr11	93219941	120976413	pat_162	Gain	chr11	112944247	112944430	112944247	112944430	183	intronic	NCAM1	Prabhakar_HAR872	HAR_Merge50-00354	15_Quies-ES-deriv-hESC_Derived_CD56+_Mesoderm_Cultured_Cells,5_TxWk-Heart-Left_Ventricle,15_Quies-Other-Pancreas,14_ReprPCWk-ENCODE2012-Dnd41_TCell_Leukemia,15_Quies-Digestive-Rectal_Mucosa.Donor_29,15_Quies-Sm._Muscle-Duodenum_Smooth_Muscle,14_ReprPCWk-ENCODE2012-A549_EtOH_0.02pct_Lung_Carcinoma,15_Quies-Other-Spleen,5_TxWk-Brain-Brain_Hippocampus_Middle,15_Quies-ENCODE2012-HeLa-S3_Cervical_Carc…
chr11	93219941	120976413	pat_162	Gain	chr11	114014953	114015219	114014953	114015219	266	intronic	ZBTB16	Bird_HAR535	HAR_Merge50-00355	7_Enh-Heart-Aorta,7_Enh-Digestive-Esophagus,2_TssAFlnk-Epithelial-Penis_Foreskin_Fibroblast_Primary_Cells_skin01,7_Enh-Other-Adult_Liver,13_ReprPC-IMR90-IMR90_Cell_Line,2_TssAFlnk-Sm._Muscle-Stomach_Smooth_Muscle,14_ReprPCWk-ENCODE2012-A549_EtOH_0.02pct_Lung_Carcinoma,5_TxWk-HSC_&_B-cell-CD14_Primary_Cells,7_Enh-Digestive-Stomach_Mucosa,14_ReprPCWk-Epithelial-Penis_Foreskin_Keratinocyte_Primary_C…
chr11	93219941	120976413	pat_162	Gain	chr11	114099764	114100193	114099764	114100193	429	intronic	ZBTB16	BUSH_HAR46,Pollard_HAR40,Bird_HAR180,Toh_HAR230	HAR_Merge50-00356	15_Quies-ES-deriv-hESC_Derived_CD56+_Mesoderm_Cultured_Cells,14_ReprPCWk-Muscle-Fetal_Muscle_Trunk,5_TxWk-Heart-Left_Ventricle,14_ReprPCWk-ENCODE2012-Dnd41_TCell_Leukemia,13_ReprPC-IMR90-IMR90_Cell_Line,2_TssAFlnk-Sm._Muscle-Stomach_Smooth_Muscle,14_ReprPCWk-ENCODE2012-A549_EtOH_0.02pct_Lung_Carcinoma,14_ReprPCWk-Mesench-Bone_Marrow_Derived_Mesenchymal_Stem_Cell_Cultured_Cells,15_Quies-HSC_&_B-ce…	USP28
chr11	93219941	120976413	pat_162	Gain	chr11	114799193	114799383	114799193	114799383	190	intergenic	NXPE2,CADM1	Pollard_HAR181	HAR_Merge50-00357	9_Het-Epithelial-Penis_Foreskin_Fibroblast_Primary_Cells_skin02,14_ReprPCWk-Neurosph-Neurosphere_Cultured_Cells_Ganglionic_Eminence_Derived,15_Quies-ES-deriv-hESC_Derived_CD56+_Mesoderm_Cultured_Cells,14_ReprPCWk-Digestive-Colonic_Mucosa,14_ReprPCWk-Muscle-Fetal_Muscle_Trunk,15_Quies-Other-Pancreas,15_Quies-Sm._Muscle-Duodenum_Smooth_Muscle,14_ReprPCWk-ENCODE2012-A549_EtOH_0.02pct_Lung_Carcinoma,…
chr11	93219941	120976413	pat_162	Gain	chr11	115086734	115086933	115086734	115086933	199	intronic	CADM1	Prabhakar_HAR249	HAR_Merge50-00358	5_TxWk-Heart-Left_Ventricle,14_ReprPCWk-ENCODE2012-Dnd41_TCell_Leukemia,15_Quies-Digestive-Rectal_Mucosa.Donor_29,5_TxWk-ES-deriv-hESC_Derived_CD56+_Ectoderm_Cultured_Cells,6_EnhG-Neurosph-Neurosphere_Cultured_Cells_Cortex_Derived,15_Quies-Sm._Muscle-Duodenum_Smooth_Muscle,15_Quies-Other-Spleen,15_Quies-Sm._Muscle-Rectal_Smooth_Muscle,15_Quies-ENCODE2012-HeLa-S3_Cervical_Carcinoma,15_Quies-HSC_&_…
chr11	93219941	120976413	pat_162	Gain	chr11	115155689	115155898	115155689	115155898	209	intronic	CADM1	Prabhakar_HAR698	HAR_Merge50-00359	5_TxWk-Heart-Left_Ventricle,15_Quies-Other-Pancreas,14_ReprPCWk-ENCODE2012-Dnd41_TCell_Leukemia,15_Quies-Digestive-Rectal_Mucosa.Donor_29,5_TxWk-ES-deriv-hESC_Derived_CD56+_Ectoderm_Cultured_Cells,5_TxWk-ENCODE2012-HepG2_Hepatocellular_Carcinoma,15_Quies-Sm._Muscle-Duodenum_Smooth_Muscle,15_Quies-Other-Spleen,15_Quies-Sm._Muscle-Rectal_Smooth_Muscle,15_Quies-ENCODE2012-HeLa-S3_Cervical_Carcinoma,…
chr11	93219941	120976413	pat_162	Gain	chr11	115214219	115214401	115214219	115214401	182	intronic	CADM1	Bird_HAR536	HAR_Merge50-00360	15_Quies-Other-Pancreas,14_ReprPCWk-ENCODE2012-Dnd41_TCell_Leukemia,15_Quies-Digestive-Rectal_Mucosa.Donor_29,5_TxWk-ENCODE2012-HepG2_Hepatocellular_Carcinoma,15_Quies-Sm._Muscle-Duodenum_Smooth_Muscle,15_Quies-Other-Spleen,15_Quies-Brain-Brain_Mid_Frontal_Lobe,14_ReprPCWk-Mesench-Bone_Marrow_Derived_Mesenchymal_Stem_Cell_Cultured_Cells,15_Quies-Sm._Muscle-Rectal_Smooth_Muscle,15_Quies-ENCODE2012…
chr11	93219941	120976413	pat_162	Gain	chr11	115350216	115350506	115350216	115350506	290	intronic	CADM1	Bird_HAR537	HAR_Merge50-00361	5_TxWk-Heart-Left_Ventricle,14_ReprPCWk-ENCODE2012-Dnd41_TCell_Leukemia,15_Quies-Other-Pancreas,5_TxWk-ENCODE2012-HepG2_Hepatocellular_Carcinoma,15_Quies-Sm._Muscle-Duodenum_Smooth_Muscle,15_Quies-Other-Spleen,15_Quies-Brain-Brain_Mid_Frontal_Lobe,5_TxWk-Brain-Brain_Hippocampus_Middle,15_Quies-Sm._Muscle-Rectal_Smooth_Muscle,15_Quies-ENCODE2012-HeLa-S3_Cervical_Carcinoma,15_Quies-iPSC-iPS-20b_Cel…
chr11	93219941	120976413	pat_162	Gain	chr11	115563356	115563482	115563356	115563482	126	intergenic	CADM1,LINC00900	Pollard_HAR188	HAR_Merge50-00362	15_Quies-ES-deriv-hESC_Derived_CD56+_Mesoderm_Cultured_Cells,14_ReprPCWk-Digestive-Colonic_Mucosa,14_ReprPCWk-ENCODE2012-Dnd41_TCell_Leukemia,15_Quies-Other-Pancreas,15_Quies-Digestive-Rectal_Mucosa.Donor_29,13_ReprPC-HSC_&_B-cell-CD14_Primary_Cells,13_ReprPC-IMR90-IMR90_Cell_Line,15_Quies-Sm._Muscle-Duodenum_Smooth_Muscle,14_ReprPCWk-ENCODE2012-A549_EtOH_0.02pct_Lung_Carcinoma,15_Quies-Other-Spl…
chr11	93219941	120976413	pat_162	Gain	chr11	115648182	115648526	115648182	115648526	344	intergenic	LINC00900,BUD13	Prabhakar_HAR548,Toh_HAR87	HAR_Merge50-00363	9_Het-Epithelial-Penis_Foreskin_Fibroblast_Primary_Cells_skin02,14_ReprPCWk-Muscle-Fetal_Muscle_Trunk,5_TxWk-Heart-Left_Ventricle,15_Quies-Other-Pancreas,15_Quies-Digestive-Rectal_Mucosa.Donor_29,15_Quies-Sm._Muscle-Duodenum_Smooth_Muscle,15_Quies-Other-Spleen,14_ReprPCWk-ENCODE2012-A549_EtOH_0.02pct_Lung_Carcinoma,15_Quies-Sm._Muscle-Rectal_Smooth_Muscle,15_Quies-ENCODE2012-HeLa-S3_Cervical_Carc…
chr11	93219941	120976413	pat_162	Gain	chr11	115924312	115924542	115924312	115924542	230	intergenic	LINC00900,BUD13	Pollard_HAR172	HAR_Merge50-00364	9_Het-Epithelial-Penis_Foreskin_Fibroblast_Primary_Cells_skin02,15_Quies-ES-deriv-hESC_Derived_CD56+_Mesoderm_Cultured_Cells,14_ReprPCWk-Muscle-Fetal_Muscle_Trunk,15_Quies-Other-Pancreas,14_ReprPCWk-ENCODE2012-Dnd41_TCell_Leukemia,14_ReprPCWk-ENCODE2012-A549_EtOH_0.02pct_Lung_Carcinoma,15_Quies-Other-Spleen,15_Quies-Brain-Brain_Mid_Frontal_Lobe,15_Quies-Sm._Muscle-Rectal_Smooth_Muscle,12_EnhBiv-E…
chr11	93219941	120976413	pat_162	Gain	chr11	116045070	116045261	116045070	116045261	191	intergenic	LINC00900,BUD13	Toh_HAR116,Bird_HAR181	HAR_Merge50-00365	9_Het-Epithelial-Penis_Foreskin_Fibroblast_Primary_Cells_skin02,15_Quies-ES-deriv-hESC_Derived_CD56+_Mesoderm_Cultured_Cells,14_ReprPCWk-Muscle-Fetal_Muscle_Trunk,15_Quies-Other-Pancreas,14_ReprPCWk-ENCODE2012-Dnd41_TCell_Leukemia,15_Quies-Sm._Muscle-Duodenum_Smooth_Muscle,14_ReprPCWk-ENCODE2012-A549_EtOH_0.02pct_Lung_Carcinoma,15_Quies-Sm._Muscle-Rectal_Smooth_Muscle,14_ReprPCWk-Mesench-Bone_Mar…
chr11	93219941	120976413	pat_162	Gain	chr11	116240407	116240609	116240407	116240609	202	intergenic	LINC00900,BUD13	Toh_HAR298	HAR_Merge50-00366	9_Het-Epithelial-Penis_Foreskin_Fibroblast_Primary_Cells_skin02,15_Quies-ES-deriv-hESC_Derived_CD56+_Mesoderm_Cultured_Cells,14_ReprPCWk-Muscle-Fetal_Muscle_Trunk,15_Quies-Other-Pancreas,14_ReprPCWk-ENCODE2012-Dnd41_TCell_Leukemia,15_Quies-Other-Spleen,14_ReprPCWk-ENCODE2012-A549_EtOH_0.02pct_Lung_Carcinoma,15_Quies-Brain-Brain_Mid_Frontal_Lobe,15_Quies-iPSC-iPS-20b_Cell_Line,14_ReprPCWk-Heart-Le…	SIK3,PAFAH1B2,ZNF259,BUD13
chr11	93219941	120976413	pat_162	Gain	chr11	116431419	116431595	116431419	116431595	176	intergenic	LINC00900,BUD13	Pollard_HAR185	HAR_Merge50-00367	15_Quies-ES-deriv-hESC_Derived_CD56+_Mesoderm_Cultured_Cells,14_ReprPCWk-Muscle-Fetal_Muscle_Trunk,14_ReprPCWk-ENCODE2012-Dnd41_TCell_Leukemia,15_Quies-Other-Pancreas,15_Quies-Digestive-Rectal_Mucosa.Donor_29,5_TxWk-ES-deriv-hESC_Derived_CD56+_Ectoderm_Cultured_Cells,15_Quies-Sm._Muscle-Duodenum_Smooth_Muscle,15_Quies-Other-Spleen,5_TxWk-ENCODE2012-NH-A_Astrocytes,15_Quies-HSC_&_B-cell-CD14_Prima…	PAFAH1B2,ZNF259,SIK3
chr11	93219941	120976413	pat_162	Gain	chr11	117333214	117333583	117333214	117333583	369	intronic	DSCAML1	Prabhakar_HAR459,Pollard_HAR94	HAR_Merge50-00368	15_Quies-ES-deriv-hESC_Derived_CD56+_Mesoderm_Cultured_Cells,14_ReprPCWk-Muscle-Fetal_Muscle_Trunk,5_TxWk-Heart-Left_Ventricle,15_Quies-Digestive-Rectal_Mucosa.Donor_29,13_ReprPC-IMR90-IMR90_Cell_Line,15_Quies-Sm._Muscle-Duodenum_Smooth_Muscle,14_ReprPCWk-Mesench-Bone_Marrow_Derived_Mesenchymal_Stem_Cell_Cultured_Cells,15_Quies-Sm._Muscle-Rectal_Smooth_Muscle,15_Quies-HSC_&_B-cell-CD14_Primary_Ce…
chr11	93219941	120976413	pat_162	Gain	chr11	118796334	118796366	118796334	118796366	32	intergenic	BCL9L,UPK2	Toh_HAR62	HAR_Merge50-00369	1_TssA-ES-deriv-H9_Derived_Neuronal_Progenitor_Cultured_Cells,1_TssA-ENCODE2012-Osteoblasts,1_TssA-ES-deriv-hESC_Derived_CD56+_Mesoderm_Cultured_Cells,1_TssA-ES-deriv-H1_Derived_Mesenchymal_Stem_Cells,1_TssA-ES-deriv-H1_BMP4_Derived_Trophoblast_Cultured_Cells,3_TxFlnk-iPSC-iPS_DF_19.11_Cell_Line,1_TssA-iPSC-iPS-15b_Cell_Line,1_TssA-Other-Placenta_Amnion,1_TssA-Blood_&_T-cell-CD3_Primary_Cells_Per…
chr11	93219941	120976413	pat_162	Gain	chr11	119547415	119547563	119547415	119547563	148	intronic	PVRL1	Prabhakar_HAR467	HAR_Merge50-00370	4_Tx-Muscle-Fetal_Muscle_Leg,4_Tx-iPSC-iPS-20b_Cell_Line,5_TxWk-ENCODE2012-HepG2_Hepatocellular_Carcinoma,15_Quies-ENCODE2012-HeLa-S3_Cervical_Carcinoma,4_Tx-Digestive-Duodenum_Mucosa,4_Tx-Digestive-Colonic_Mucosa,7_Enh-ENCODE2012-Osteoblasts,7_Enh-Epithelial-Penis_Foreskin_Fibroblast_Primary_Cells_skin01,4_Tx-Digestive-Fetal_Stomach,4_Tx-Digestive-Gastric,7_Enh-ENCODE2012-NH-A_Astrocytes,7_Enh-E…	TMEM136
chr11	93219941	120976413	pat_162	Gain	chr11	119851124	119851295	119851124	119851295	171	intergenic	PVRL1,TRIM29	Prabhakar_HAR858	HAR_Merge50-00371	14_ReprPCWk-Neurosph-Neurosphere_Cultured_Cells_Ganglionic_Eminence_Derived,14_ReprPCWk-Muscle-Fetal_Muscle_Trunk,14_ReprPCWk-Digestive-Colonic_Mucosa,14_ReprPCWk-ENCODE2012-Dnd41_TCell_Leukemia,15_Quies-Other-Pancreas,13_ReprPC-IMR90-IMR90_Cell_Line,15_Quies-Other-Spleen,14_ReprPCWk-ENCODE2012-A549_EtOH_0.02pct_Lung_Carcinoma,15_Quies-Brain-Brain_Mid_Frontal_Lobe,5_TxWk-Brain-Brain_Hippocampus_M…	ARHGEF12
chr11	93219941	120976413	pat_162	Gain	chr11	120640761	120641144	120640761	120641144	383	intronic	GRIK4	Prabhakar_HAR74	HAR_Merge50-00372	15_Quies-ES-deriv-hESC_Derived_CD56+_Mesoderm_Cultured_Cells,14_ReprPCWk-Digestive-Colonic_Mucosa,14_ReprPCWk-HSC_&_B-cell-CD19_Primary_Cells_Peripheral_UW,15_Quies-Other-Pancreas,15_Quies-Sm._Muscle-Duodenum_Smooth_Muscle,15_Quies-Other-Spleen,14_ReprPCWk-ENCODE2012-A549_EtOH_0.02pct_Lung_Carcinoma,15_Quies-Brain-Brain_Mid_Frontal_Lobe,15_Quies-Sm._Muscle-Rectal_Smooth_Muscle,14_ReprPCWk-Mesench…
chr11	95997478	96039316	pat_010	Loss	chr11	96028302	96028500	96028302	96028500	198	intronic	MAML2	Bird_HAR570	HAR_Merge50-00344	5_TxWk-HSC_&_B-cell-CD19_Primary_Cells_Peripheral_UW,5_TxWk-Digestive-Colonic_Mucosa,5_TxWk-Heart-Left_Ventricle,15_Quies-Other-Pancreas,5_TxWk-Epithelial-Penis_Foreskin_Fibroblast_Primary_Cells_skin02,15_Quies-Other-Spleen,5_TxWk-HSC_&_B-cell-CD14_Primary_Cells,15_Quies-Sm._Muscle-Rectal_Smooth_Muscle,15_Quies-ENCODE2012-HeLa-S3_Cervical_Carcinoma,15_Quies-HSC_&_B-cell-CD15_Primary_Cells,7_Enh-E…
chr11	98468240	98556707	pat_010	Loss	chr11	98524353	98524656	98524353	98524656	303	intergenic	NONE,CNTN5	Bird_HAR82	HAR_Merge50-00347	15_Quies-ES-deriv-hESC_Derived_CD56+_Mesoderm_Cultured_Cells,15_Quies-Other-Pancreas,15_Quies-Digestive-Rectal_Mucosa.Donor_29,15_Quies-Sm._Muscle-Duodenum_Smooth_Muscle,15_Quies-Other-Spleen,15_Quies-Brain-Brain_Mid_Frontal_Lobe,15_Quies-Sm._Muscle-Rectal_Smooth_Muscle,15_Quies-ENCODE2012-HeLa-S3_Cervical_Carcinoma,15_Quies-HSC_&_B-cell-CD14_Primary_Cells,15_Quies-iPSC-iPS-20b_Cell_Line,15_Quies…
chr11	100407861	100510448	pat_010	Loss	chr11	100447375	100447660	100447375	100447660	285	intergenic	CNTN5,ARHGAP42	Prabhakar_HAR775	HAR_Merge50-00348	15_Quies-ES-deriv-hESC_Derived_CD56+_Mesoderm_Cultured_Cells,14_ReprPCWk-HSC_&_B-cell-CD19_Primary_Cells_Peripheral_UW,14_ReprPCWk-ENCODE2012-Dnd41_TCell_Leukemia,15_Quies-Other-Pancreas,15_Quies-Digestive-Rectal_Mucosa.Donor_29,7_Enh-Other-Adult_Liver,15_Quies-Sm._Muscle-Duodenum_Smooth_Muscle,14_ReprPCWk-ENCODE2012-A549_EtOH_0.02pct_Lung_Carcinoma,15_Quies-Other-Spleen,15_Quies-Brain-Brain_Mid_…
chr11	109297050	109300723	pat_010	Loss	chr11	109297851	109298156	109297851	109298156	305	UTR3	C11orf87	Bird_HAR39	HAR_Merge50-00349	15_Quies-ES-deriv-hESC_Derived_CD56+_Mesoderm_Cultured_Cells,15_Quies-Other-Pancreas,15_Quies-Digestive-Rectal_Mucosa.Donor_29,14_ReprPCWk-ENCODE2012-A549_EtOH_0.02pct_Lung_Carcinoma,15_Quies-Other-Spleen,15_Quies-Sm._Muscle-Rectal_Smooth_Muscle,15_Quies-ENCODE2012-HeLa-S3_Cervical_Carcinoma,14_ReprPCWk-Heart-Left_Ventricle,14_ReprPCWk-HSC_&_B-cell-CD14_Primary_Cells,14_ReprPCWk-Digestive-Sigmoid…
chr11	109395944	109513047	pat_010	Gain	chr11	109403875	109404155	109403875	109404155	280	intergenic	C11orf87,ZC3H12C	Bird_HAR533,Prabhakar_HAR759	HAR_Merge50-00350	15_Quies-ES-deriv-hESC_Derived_CD56+_Mesoderm_Cultured_Cells,15_Quies-Other-Pancreas,15_Quies-Digestive-Rectal_Mucosa.Donor_29,15_Quies-Sm._Muscle-Duodenum_Smooth_Muscle,15_Quies-Other-Spleen,15_Quies-Brain-Brain_Mid_Frontal_Lobe,15_Quies-Sm._Muscle-Rectal_Smooth_Muscle,15_Quies-ENCODE2012-HeLa-S3_Cervical_Carcinoma,15_Quies-HSC_&_B-cell-CD14_Primary_Cells,15_Quies-iPSC-iPS-20b_Cell_Line,15_Quies…
chr11	110945179	110963461	pat_010	Gain	chr11	110951765	110952083	110951765	110952083	318	intergenic	ARHGAP20,C11orf53	Prabhakar_HAR790	HAR_Merge50-00351	15_Quies-ES-deriv-hESC_Derived_CD56+_Mesoderm_Cultured_Cells,14_ReprPCWk-ENCODE2012-Dnd41_TCell_Leukemia,15_Quies-Other-Pancreas,15_Quies-Digestive-Rectal_Mucosa.Donor_29,15_Quies-Other-Spleen,15_Quies-Brain-Brain_Mid_Frontal_Lobe,14_ReprPCWk-Mesench-Bone_Marrow_Derived_Mesenchymal_Stem_Cell_Cultured_Cells,15_Quies-ENCODE2012-HeLa-S3_Cervical_Carcinoma,15_Quies-HSC_&_B-cell-CD14_Primary_Cells,15_…	PPP2R1B
chr11	112695214	112787696	pat_010	Gain	chr11	112781754	112782166	112781754	112782166	412	intergenic	LOC387810,NCAM1	Bird_HAR534	HAR_Merge50-00353	14_ReprPCWk-Neurosph-Neurosphere_Cultured_Cells_Ganglionic_Eminence_Derived,14_ReprPCWk-ENCODE2012-Dnd41_TCell_Leukemia,15_Quies-Other-Pancreas,15_Quies-Sm._Muscle-Duodenum_Smooth_Muscle,15_Quies-Other-Spleen,14_ReprPCWk-ENCODE2012-A549_EtOH_0.02pct_Lung_Carcinoma,15_Quies-Brain-Brain_Mid_Frontal_Lobe,15_Quies-Sm._Muscle-Rectal_Smooth_Muscle,15_Quies-HSC_&_B-cell-CD14_Primary_Cells,15_Quies-iPSC-…
chr11	113998247	114026005	pat_007	Gain	chr11	114014953	114015219	114014953	114015219	266	intronic	ZBTB16	Bird_HAR535	HAR_Merge50-00355	7_Enh-Heart-Aorta,7_Enh-Digestive-Esophagus,2_TssAFlnk-Epithelial-Penis_Foreskin_Fibroblast_Primary_Cells_skin01,7_Enh-Other-Adult_Liver,13_ReprPC-IMR90-IMR90_Cell_Line,2_TssAFlnk-Sm._Muscle-Stomach_Smooth_Muscle,14_ReprPCWk-ENCODE2012-A549_EtOH_0.02pct_Lung_Carcinoma,5_TxWk-HSC_&_B-cell-CD14_Primary_Cells,7_Enh-Digestive-Stomach_Mucosa,14_ReprPCWk-Epithelial-Penis_Foreskin_Keratinocyte_Primary_C…
chr11	114000633	114015999	pat_010	Gain	chr11	114014953	114015219	114014953	114015219	266	intronic	ZBTB16	Bird_HAR535	HAR_Merge50-00355	7_Enh-Heart-Aorta,7_Enh-Digestive-Esophagus,2_TssAFlnk-Epithelial-Penis_Foreskin_Fibroblast_Primary_Cells_skin01,7_Enh-Other-Adult_Liver,13_ReprPC-IMR90-IMR90_Cell_Line,2_TssAFlnk-Sm._Muscle-Stomach_Smooth_Muscle,14_ReprPCWk-ENCODE2012-A549_EtOH_0.02pct_Lung_Carcinoma,5_TxWk-HSC_&_B-cell-CD14_Primary_Cells,7_Enh-Digestive-Stomach_Mucosa,14_ReprPCWk-Epithelial-Penis_Foreskin_Keratinocyte_Primary_C…
chr11	114093896	114104133	pat_012	Gain	chr11	114099764	114100193	114099764	114100193	429	intronic	ZBTB16	BUSH_HAR46,Pollard_HAR40,Bird_HAR180,Toh_HAR230	HAR_Merge50-00356	15_Quies-ES-deriv-hESC_Derived_CD56+_Mesoderm_Cultured_Cells,14_ReprPCWk-Muscle-Fetal_Muscle_Trunk,5_TxWk-Heart-Left_Ventricle,14_ReprPCWk-ENCODE2012-Dnd41_TCell_Leukemia,13_ReprPC-IMR90-IMR90_Cell_Line,2_TssAFlnk-Sm._Muscle-Stomach_Smooth_Muscle,14_ReprPCWk-ENCODE2012-A549_EtOH_0.02pct_Lung_Carcinoma,14_ReprPCWk-Mesench-Bone_Marrow_Derived_Mesenchymal_Stem_Cell_Cultured_Cells,15_Quies-HSC_&_B-ce…	USP28
chr11	115022714	115147980	pat_009	Gain	chr11	115086734	115086933	115086734	115086933	199	intronic	CADM1	Prabhakar_HAR249	HAR_Merge50-00358	5_TxWk-Heart-Left_Ventricle,14_ReprPCWk-ENCODE2012-Dnd41_TCell_Leukemia,15_Quies-Digestive-Rectal_Mucosa.Donor_29,5_TxWk-ES-deriv-hESC_Derived_CD56+_Ectoderm_Cultured_Cells,6_EnhG-Neurosph-Neurosphere_Cultured_Cells_Cortex_Derived,15_Quies-Sm._Muscle-Duodenum_Smooth_Muscle,15_Quies-Other-Spleen,15_Quies-Sm._Muscle-Rectal_Smooth_Muscle,15_Quies-ENCODE2012-HeLa-S3_Cervical_Carcinoma,15_Quies-HSC_&_…
chr11	115347067	115377736	pat_010	Loss	chr11	115350216	115350506	115350216	115350506	290	intronic	CADM1	Bird_HAR537	HAR_Merge50-00361	5_TxWk-Heart-Left_Ventricle,14_ReprPCWk-ENCODE2012-Dnd41_TCell_Leukemia,15_Quies-Other-Pancreas,5_TxWk-ENCODE2012-HepG2_Hepatocellular_Carcinoma,15_Quies-Sm._Muscle-Duodenum_Smooth_Muscle,15_Quies-Other-Spleen,15_Quies-Brain-Brain_Mid_Frontal_Lobe,5_TxWk-Brain-Brain_Hippocampus_Middle,15_Quies-Sm._Muscle-Rectal_Smooth_Muscle,15_Quies-ENCODE2012-HeLa-S3_Cervical_Carcinoma,15_Quies-iPSC-iPS-20b_Cel…
chr11	117214000	117546482	pat_013	Gain	chr11	117333214	117333583	117333214	117333583	369	intronic	DSCAML1	Prabhakar_HAR459,Pollard_HAR94	HAR_Merge50-00368	15_Quies-ES-deriv-hESC_Derived_CD56+_Mesoderm_Cultured_Cells,14_ReprPCWk-Muscle-Fetal_Muscle_Trunk,5_TxWk-Heart-Left_Ventricle,15_Quies-Digestive-Rectal_Mucosa.Donor_29,13_ReprPC-IMR90-IMR90_Cell_Line,15_Quies-Sm._Muscle-Duodenum_Smooth_Muscle,14_ReprPCWk-Mesench-Bone_Marrow_Derived_Mesenchymal_Stem_Cell_Cultured_Cells,15_Quies-Sm._Muscle-Rectal_Smooth_Muscle,15_Quies-HSC_&_B-cell-CD14_Primary_Ce…
chr11	117257647	117557609	pat_009	Gain	chr11	117333214	117333583	117333214	117333583	369	intronic	DSCAML1	Prabhakar_HAR459,Pollard_HAR94	HAR_Merge50-00368	15_Quies-ES-deriv-hESC_Derived_CD56+_Mesoderm_Cultured_Cells,14_ReprPCWk-Muscle-Fetal_Muscle_Trunk,5_TxWk-Heart-Left_Ventricle,15_Quies-Digestive-Rectal_Mucosa.Donor_29,13_ReprPC-IMR90-IMR90_Cell_Line,15_Quies-Sm._Muscle-Duodenum_Smooth_Muscle,14_ReprPCWk-Mesench-Bone_Marrow_Derived_Mesenchymal_Stem_Cell_Cultured_Cells,15_Quies-Sm._Muscle-Rectal_Smooth_Muscle,15_Quies-HSC_&_B-cell-CD14_Primary_Ce…
chr11	117326228	117339926	pat_010	Loss	chr11	117333214	117333583	117333214	117333583	369	intronic	DSCAML1	Prabhakar_HAR459,Pollard_HAR94	HAR_Merge50-00368	15_Quies-ES-deriv-hESC_Derived_CD56+_Mesoderm_Cultured_Cells,14_ReprPCWk-Muscle-Fetal_Muscle_Trunk,5_TxWk-Heart-Left_Ventricle,15_Quies-Digestive-Rectal_Mucosa.Donor_29,13_ReprPC-IMR90-IMR90_Cell_Line,15_Quies-Sm._Muscle-Duodenum_Smooth_Muscle,14_ReprPCWk-Mesench-Bone_Marrow_Derived_Mesenchymal_Stem_Cell_Cultured_Cells,15_Quies-Sm._Muscle-Rectal_Smooth_Muscle,15_Quies-HSC_&_B-cell-CD14_Primary_Ce…
chr11	118735928	118803871	pat_010	Loss	chr11	118796334	118796366	118796334	118796366	32	intergenic	BCL9L,UPK2	Toh_HAR62	HAR_Merge50-00369	1_TssA-ES-deriv-H9_Derived_Neuronal_Progenitor_Cultured_Cells,1_TssA-ENCODE2012-Osteoblasts,1_TssA-ES-deriv-hESC_Derived_CD56+_Mesoderm_Cultured_Cells,1_TssA-ES-deriv-H1_Derived_Mesenchymal_Stem_Cells,1_TssA-ES-deriv-H1_BMP4_Derived_Trophoblast_Cultured_Cells,3_TxFlnk-iPSC-iPS_DF_19.11_Cell_Line,1_TssA-iPSC-iPS-15b_Cell_Line,1_TssA-Other-Placenta_Amnion,1_TssA-Blood_&_T-cell-CD3_Primary_Cells_Per…
chr11	119475308	119650105	pat_013	Gain	chr11	119547415	119547563	119547415	119547563	148	intronic	PVRL1	Prabhakar_HAR467	HAR_Merge50-00370	4_Tx-Muscle-Fetal_Muscle_Leg,4_Tx-iPSC-iPS-20b_Cell_Line,5_TxWk-ENCODE2012-HepG2_Hepatocellular_Carcinoma,15_Quies-ENCODE2012-HeLa-S3_Cervical_Carcinoma,4_Tx-Digestive-Duodenum_Mucosa,4_Tx-Digestive-Colonic_Mucosa,7_Enh-ENCODE2012-Osteoblasts,7_Enh-Epithelial-Penis_Foreskin_Fibroblast_Primary_Cells_skin01,4_Tx-Digestive-Fetal_Stomach,4_Tx-Digestive-Gastric,7_Enh-ENCODE2012-NH-A_Astrocytes,7_Enh-E…	TMEM136
chr11	119536298	119563058	pat_010	Gain	chr11	119547415	119547563	119547415	119547563	148	intronic	PVRL1	Prabhakar_HAR467	HAR_Merge50-00370	4_Tx-Muscle-Fetal_Muscle_Leg,4_Tx-iPSC-iPS-20b_Cell_Line,5_TxWk-ENCODE2012-HepG2_Hepatocellular_Carcinoma,15_Quies-ENCODE2012-HeLa-S3_Cervical_Carcinoma,4_Tx-Digestive-Duodenum_Mucosa,4_Tx-Digestive-Colonic_Mucosa,7_Enh-ENCODE2012-Osteoblasts,7_Enh-Epithelial-Penis_Foreskin_Fibroblast_Primary_Cells_skin01,4_Tx-Digestive-Fetal_Stomach,4_Tx-Digestive-Gastric,7_Enh-ENCODE2012-NH-A_Astrocytes,7_Enh-E…	TMEM136
chr11	119782056	119861279	pat_013	Gain	chr11	119851124	119851295	119851124	119851295	171	intergenic	PVRL1,TRIM29	Prabhakar_HAR858	HAR_Merge50-00371	14_ReprPCWk-Neurosph-Neurosphere_Cultured_Cells_Ganglionic_Eminence_Derived,14_ReprPCWk-Muscle-Fetal_Muscle_Trunk,14_ReprPCWk-Digestive-Colonic_Mucosa,14_ReprPCWk-ENCODE2012-Dnd41_TCell_Leukemia,15_Quies-Other-Pancreas,13_ReprPC-IMR90-IMR90_Cell_Line,15_Quies-Other-Spleen,14_ReprPCWk-ENCODE2012-A549_EtOH_0.02pct_Lung_Carcinoma,15_Quies-Brain-Brain_Mid_Frontal_Lobe,5_TxWk-Brain-Brain_Hippocampus_M…	ARHGEF12
chr11	119838717	119857986	pat_010	Gain	chr11	119851124	119851295	119851124	119851295	171	intergenic	PVRL1,TRIM29	Prabhakar_HAR858	HAR_Merge50-00371	14_ReprPCWk-Neurosph-Neurosphere_Cultured_Cells_Ganglionic_Eminence_Derived,14_ReprPCWk-Muscle-Fetal_Muscle_Trunk,14_ReprPCWk-Digestive-Colonic_Mucosa,14_ReprPCWk-ENCODE2012-Dnd41_TCell_Leukemia,15_Quies-Other-Pancreas,13_ReprPC-IMR90-IMR90_Cell_Line,15_Quies-Other-Spleen,14_ReprPCWk-ENCODE2012-A549_EtOH_0.02pct_Lung_Carcinoma,15_Quies-Brain-Brain_Mid_Frontal_Lobe,5_TxWk-Brain-Brain_Hippocampus_M…	ARHGEF12
chr11	120372336	120742429	pat_009	Gain	chr11	120640761	120641144	120640761	120641144	383	intronic	GRIK4	Prabhakar_HAR74	HAR_Merge50-00372	15_Quies-ES-deriv-hESC_Derived_CD56+_Mesoderm_Cultured_Cells,14_ReprPCWk-Digestive-Colonic_Mucosa,14_ReprPCWk-HSC_&_B-cell-CD19_Primary_Cells_Peripheral_UW,15_Quies-Other-Pancreas,15_Quies-Sm._Muscle-Duodenum_Smooth_Muscle,15_Quies-Other-Spleen,14_ReprPCWk-ENCODE2012-A549_EtOH_0.02pct_Lung_Carcinoma,15_Quies-Brain-Brain_Mid_Frontal_Lobe,15_Quies-Sm._Muscle-Rectal_Smooth_Muscle,14_ReprPCWk-Mesench…
chr11	120980266	134938470	pat_162	Gain	chr11	121801206	121801409	121801206	121801409	203	intergenic	SORL1,MIR100HG	Bird_HAR538	HAR_Merge50-00373	15_Quies-ES-deriv-hESC_Derived_CD56+_Mesoderm_Cultured_Cells,1_TssA-ENCODE2012-Osteoblasts,2_TssAFlnk-Brain-Brain_Mid_Frontal_Lobe,15_Quies-Other-Pancreas,14_ReprPCWk-ENCODE2012-Dnd41_TCell_Leukemia,15_Quies-Digestive-Rectal_Mucosa.Donor_29,2_TssAFlnk-Adipose-Adipose_Nuclei,12_EnhBiv-HSC_&_B-cell-CD19_Primary_Cells_Peripheral_UW,5_TxWk-Epithelial-Penis_Foreskin_Fibroblast_Primary_Cells_skin02,2_T…
chr11	120980266	134938470	pat_162	Gain	chr11	125220634	125220648	125220634	125220648	14	intronic	PKNOX2	Toh_HAR32	HAR_Merge50-00374	15_Quies-ES-deriv-hESC_Derived_CD56+_Mesoderm_Cultured_Cells,14_ReprPCWk-Digestive-Colonic_Mucosa,5_TxWk-Heart-Left_Ventricle,14_ReprPCWk-HSC_&_B-cell-CD19_Primary_Cells_Peripheral_UW,14_ReprPCWk-ENCODE2012-Dnd41_TCell_Leukemia,1_TssA-iPSC-iPS-15b_Cell_Line,15_Quies-Sm._Muscle-Duodenum_Smooth_Muscle,15_Quies-Other-Spleen,14_ReprPCWk-ENCODE2012-A549_EtOH_0.02pct_Lung_Carcinoma,5_TxWk-ENCODE2012-NH…
chr11	120980266	134938470	pat_162	Gain	chr11	126784915	126785177	126784915	126785177	262	intronic	KIRREL3	Bird_HAR539	HAR_Merge50-00375	15_Quies-ES-deriv-hESC_Derived_CD56+_Mesoderm_Cultured_Cells,14_ReprPCWk-Muscle-Fetal_Muscle_Trunk,14_ReprPCWk-ENCODE2012-Dnd41_TCell_Leukemia,15_Quies-Digestive-Rectal_Mucosa.Donor_29,15_Quies-Sm._Muscle-Duodenum_Smooth_Muscle,5_TxWk-Brain-Brain_Hippocampus_Middle,15_Quies-Sm._Muscle-Rectal_Smooth_Muscle,15_Quies-ENCODE2012-HeLa-S3_Cervical_Carcinoma,15_Quies-HSC_&_B-cell-CD14_Primary_Cells,15_Q…
chr11	120980266	134938470	pat_162	Gain	chr11	127013462	127013655	127013462	127013655	193	intergenic	KIRREL3-AS3,ETS1	Prabhakar_HAR15	HAR_Merge50-00376	15_Quies-ES-deriv-hESC_Derived_CD56+_Mesoderm_Cultured_Cells,14_ReprPCWk-Muscle-Fetal_Muscle_Trunk,15_Quies-Other-Pancreas,14_ReprPCWk-ENCODE2012-Dnd41_TCell_Leukemia,15_Quies-Digestive-Rectal_Mucosa.Donor_29,15_Quies-Sm._Muscle-Duodenum_Smooth_Muscle,14_ReprPCWk-ENCODE2012-A549_EtOH_0.02pct_Lung_Carcinoma,15_Quies-Other-Spleen,15_Quies-Brain-Brain_Mid_Frontal_Lobe,14_ReprPCWk-Mesench-Bone_Marrow…
chr11	120980266	134938470	pat_162	Gain	chr11	127064075	127064309	127064075	127064309	234	intergenic	KIRREL3-AS3,ETS1	Prabhakar_HAR123	HAR_Merge50-00377	15_Quies-ES-deriv-hESC_Derived_CD56+_Mesoderm_Cultured_Cells,14_ReprPCWk-ENCODE2012-Dnd41_TCell_Leukemia,15_Quies-Other-Pancreas,15_Quies-Digestive-Rectal_Mucosa.Donor_29,15_Quies-Sm._Muscle-Duodenum_Smooth_Muscle,14_ReprPCWk-ENCODE2012-A549_EtOH_0.02pct_Lung_Carcinoma,15_Quies-Other-Spleen,14_ReprPCWk-Mesench-Bone_Marrow_Derived_Mesenchymal_Stem_Cell_Cultured_Cells,15_Quies-Sm._Muscle-Rectal_Smo…
chr11	120980266	134938470	pat_162	Gain	chr11	128346624	128346957	128346624	128346957	333	intronic	ETS1	Prabhakar_HAR335,Toh_HAR384	HAR_Merge50-00378	4_Tx-Muscle-Fetal_Muscle_Leg,5_TxWk-Digestive-Colonic_Mucosa,6_EnhG-HSC_&_B-cell-CD56_Primary_Cells,6_EnhG-Blood_&_T-cell-CD3_Primary_Cells_Peripheral_UW,5_TxWk-ES-deriv-hESC_Derived_CD56+_Ectoderm_Cultured_Cells,6_EnhG-Adipose-Adipose_Nuclei,5_TxWk-Brain-Brain_Hippocampus_Middle,5_TxWk-HSC_&_B-cell-CD14_Primary_Cells,7_Enh-Digestive-Stomach_Mucosa,4_Tx-ENCODE2012-Osteoblasts,2_TssAFlnk-Blood_&_T…	C11orf45
chr11	120980266	134938470	pat_162	Gain	chr11	128553832	128553912	128553832	128553912	80	intergenic	ETS1,FLI1	Toh_HAR415	HAR_Merge50-00379	12_EnhBiv-ESC-4star,13_ReprPC-iPSC-iPS_DF_6.9_Cell_Line,14_ReprPCWk-Digestive-Colonic_Mucosa,7_Enh-HSC_&_B-cell-CD15_Primary_Cells,5_TxWk-Blood_&_T-cell-CD4+_CD25-_CD45RA+_Naive_Primary_Cells,15_Quies-Other-Pancreas,13_ReprPC-Digestive-Rectal_Mucosa.Donor_29,13_ReprPC-IMR90-IMR90_Cell_Line,5_TxWk-Blood_&_T-cell-CD3_Primary_Cells_Cord_BI,13_ReprPC-Digestive-Rectal_Mucosa.Donor_31,14_ReprPCWk-Mesen…
chr11	120980266	134938470	pat_162	Gain	chr11	129274665	129274906	129274665	129274906	241	intronic	BARX2	Bird_HAR182	HAR_Merge50-00380	15_Quies-ES-deriv-hESC_Derived_CD56+_Mesoderm_Cultured_Cells,14_ReprPCWk-Muscle-Fetal_Muscle_Trunk,14_ReprPCWk-ENCODE2012-Dnd41_TCell_Leukemia,15_Quies-Digestive-Rectal_Mucosa.Donor_29,15_Quies-Sm._Muscle-Duodenum_Smooth_Muscle,14_ReprPCWk-ENCODE2012-A549_EtOH_0.02pct_Lung_Carcinoma,15_Quies-Other-Spleen,15_Quies-Sm._Muscle-Rectal_Smooth_Muscle,14_ReprPCWk-Heart-Left_Ventricle,15_Quies-iPSC-iPS-2…
chr11	120980266	134938470	pat_162	Gain	chr11	130965377	130965778	130965377	130965778	401	intergenic	SNX19,NTM	Prabhakar_HAR28,Pollard_HAR14,Bird_HAR40	HAR_Merge50-00381	15_Quies-ES-deriv-hESC_Derived_CD56+_Mesoderm_Cultured_Cells,14_ReprPCWk-Muscle-Fetal_Muscle_Trunk,15_Quies-Other-Pancreas,15_Quies-Digestive-Rectal_Mucosa.Donor_29,15_Quies-Sm._Muscle-Duodenum_Smooth_Muscle,15_Quies-Other-Spleen,15_Quies-Sm._Muscle-Rectal_Smooth_Muscle,15_Quies-ENCODE2012-HeLa-S3_Cervical_Carcinoma,15_Quies-HSC_&_B-cell-CD14_Primary_Cells,14_ReprPCWk-Heart-Left_Ventricle,15_Quie…
chr11	120980266	134938470	pat_162	Gain	chr11	131265490	131265637	131265490	131265637	147	intronic	NTM	Pollard_HAR120	HAR_Merge50-00382	15_Quies-ES-deriv-hESC_Derived_CD56+_Mesoderm_Cultured_Cells,14_ReprPCWk-Muscle-Fetal_Muscle_Trunk,14_ReprPCWk-ENCODE2012-Dnd41_TCell_Leukemia,15_Quies-Other-Pancreas,15_Quies-Digestive-Rectal_Mucosa.Donor_29,15_Quies-Sm._Muscle-Duodenum_Smooth_Muscle,15_Quies-Other-Spleen,5_TxWk-Brain-Brain_Hippocampus_Middle,15_Quies-Sm._Muscle-Rectal_Smooth_Muscle,15_Quies-iPSC-iPS-20b_Cell_Line,14_ReprPCWk-He…	NTM
chr11	120980266	134938470	pat_162	Gain	chr11	131462808	131462909	131462808	131462909	101	intronic	NTM	Toh_HAR504	HAR_Merge50-00383	14_ReprPCWk-Muscle-Fetal_Muscle_Trunk,15_Quies-Other-Pancreas,15_Quies-Digestive-Rectal_Mucosa.Donor_29,15_Quies-Sm._Muscle-Duodenum_Smooth_Muscle,15_Quies-Other-Spleen,14_ReprPCWk-ENCODE2012-A549_EtOH_0.02pct_Lung_Carcinoma,14_ReprPCWk-Mesench-Bone_Marrow_Derived_Mesenchymal_Stem_Cell_Cultured_Cells,15_Quies-Sm._Muscle-Rectal_Smooth_Muscle,15_Quies-ENCODE2012-HeLa-S3_Cervical_Carcinoma,15_Quies-…	NTM
chr11	120980266	134938470	pat_162	Gain	chr11	131522845	131522870	131522845	131522870	25	intronic	NTM	Toh_HAR446	HAR_Merge50-00384	15_Quies-ES-deriv-hESC_Derived_CD56+_Mesoderm_Cultured_Cells,15_Quies-Other-Pancreas,15_Quies-Digestive-Rectal_Mucosa.Donor_29,13_ReprPC-IMR90-IMR90_Cell_Line,15_Quies-Sm._Muscle-Duodenum_Smooth_Muscle,15_Quies-Other-Spleen,14_ReprPCWk-ENCODE2012-A549_EtOH_0.02pct_Lung_Carcinoma,15_Quies-Sm._Muscle-Rectal_Smooth_Muscle,15_Quies-HSC_&_B-cell-CD14_Primary_Cells,14_ReprPCWk-Heart-Left_Ventricle,15_Q…
chr11	120980266	134938470	pat_162	Gain	chr11	131667531	131668061	131667531	131668061	530	intronic	NTM	Bird_HAR540,Prabhakar_HAR839,Bird_HAR541	HAR_Merge50-00385	15_Quies-ES-deriv-hESC_Derived_CD56+_Mesoderm_Cultured_Cells,14_ReprPCWk-Muscle-Fetal_Muscle_Trunk,15_Quies-Other-Pancreas,14_ReprPCWk-ENCODE2012-Dnd41_TCell_Leukemia,15_Quies-Digestive-Rectal_Mucosa.Donor_29,13_ReprPC-IMR90-IMR90_Cell_Line,15_Quies-Other-Spleen,15_Quies-Brain-Brain_Mid_Frontal_Lobe,15_Quies-Sm._Muscle-Rectal_Smooth_Muscle,15_Quies-ENCODE2012-HeLa-S3_Cervical_Carcinoma,15_Quies-H…
chr11	120980266	134938470	pat_162	Gain	chr11	131681355	131681825	131681355	131681825	470	intronic	NTM	Bird_HAR542	HAR_Merge50-00386	14_ReprPCWk-Neurosph-Neurosphere_Cultured_Cells_Ganglionic_Eminence_Derived,14_ReprPCWk-Muscle-Fetal_Muscle_Trunk,15_Quies-Other-Pancreas,14_ReprPCWk-ENCODE2012-Dnd41_TCell_Leukemia,15_Quies-Digestive-Rectal_Mucosa.Donor_29,13_ReprPC-IMR90-IMR90_Cell_Line,15_Quies-Other-Spleen,5_TxWk-Brain-Brain_Hippocampus_Middle,15_Quies-Sm._Muscle-Rectal_Smooth_Muscle,15_Quies-ENCODE2012-HeLa-S3_Cervical_Carci…
chr11	120980266	134938470	pat_162	Gain	chr11	131683867	131684292	131683867	131684292	425	intronic	NTM	Prabhakar_HAR927	HAR_Merge50-00387	14_ReprPCWk-Muscle-Fetal_Muscle_Trunk,15_Quies-Other-Pancreas,14_ReprPCWk-ENCODE2012-Dnd41_TCell_Leukemia,15_Quies-Digestive-Rectal_Mucosa.Donor_29,13_ReprPC-IMR90-IMR90_Cell_Line,15_Quies-Other-Spleen,5_TxWk-Brain-Brain_Hippocampus_Middle,15_Quies-Sm._Muscle-Rectal_Smooth_Muscle,15_Quies-ENCODE2012-HeLa-S3_Cervical_Carcinoma,14_ReprPCWk-Heart-Left_Ventricle,15_Quies-HSC_&_B-cell-CD15_Primary_Cel…
chr11	120980266	134938470	pat_162	Gain	chr11	131852583	131852705	131852583	131852705	122	intronic	NTM	Prabhakar_HAR58	HAR_Merge50-00388	15_Quies-ES-deriv-hESC_Derived_CD56+_Mesoderm_Cultured_Cells,15_Quies-Other-Pancreas,15_Quies-Digestive-Rectal_Mucosa.Donor_29,5_TxWk-Epithelial-Penis_Foreskin_Fibroblast_Primary_Cells_skin02,1_TssA-iPSC-iPS-15b_Cell_Line,2_TssAFlnk-iPSC-iPS-18_Cell_Line,15_Quies-Sm._Muscle-Duodenum_Smooth_Muscle,15_Quies-Other-Spleen,2_TssAFlnk-ESC-HUES6_Cell_Line,15_Quies-Brain-Brain_Mid_Frontal_Lobe,5_TxWk-Bra…
chr11	120980266	134938470	pat_162	Gain	chr11	131948475	131948847	131948475	131948847	372	intronic	NTM	Prabhakar_HAR69	HAR_Merge50-00389	15_Quies-ES-deriv-hESC_Derived_CD56+_Mesoderm_Cultured_Cells,15_Quies-Other-Pancreas,15_Quies-Digestive-Rectal_Mucosa.Donor_29,15_Quies-Sm._Muscle-Duodenum_Smooth_Muscle,15_Quies-Other-Spleen,5_TxWk-ENCODE2012-NH-A_Astrocytes,5_TxWk-Brain-Brain_Hippocampus_Middle,15_Quies-Sm._Muscle-Rectal_Smooth_Muscle,15_Quies-ENCODE2012-HeLa-S3_Cervical_Carcinoma,15_Quies-HSC_&_B-cell-CD14_Primary_Cells,15_Qui…
chr11	120980266	134938470	pat_162	Gain	chr11	132809661	132809996	132809661	132809996	335	intronic	OPCML	Bird_HAR389,Prabhakar_HAR63	HAR_Merge50-00390	15_Quies-ES-deriv-hESC_Derived_CD56+_Mesoderm_Cultured_Cells,14_ReprPCWk-Digestive-Colonic_Mucosa,14_ReprPCWk-Muscle-Fetal_Muscle_Trunk,15_Quies-Other-Pancreas,15_Quies-Sm._Muscle-Duodenum_Smooth_Muscle,15_Quies-Other-Spleen,15_Quies-Brain-Brain_Mid_Frontal_Lobe,15_Quies-Sm._Muscle-Rectal_Smooth_Muscle,15_Quies-ENCODE2012-HeLa-S3_Cervical_Carcinoma,15_Quies-HSC_&_B-cell-CD14_Primary_Cells,14_Repr…
chr11	120980266	134938470	pat_162	Gain	chr11	133142808	133142933	133142808	133142933	125	intronic	OPCML	Prabhakar_HAR304	HAR_Merge50-00391	9_Het-Epithelial-Penis_Foreskin_Fibroblast_Primary_Cells_skin02,15_Quies-ES-deriv-hESC_Derived_CD56+_Mesoderm_Cultured_Cells,14_ReprPCWk-Muscle-Fetal_Muscle_Trunk,15_Quies-Other-Pancreas,14_ReprPCWk-ENCODE2012-Dnd41_TCell_Leukemia,15_Quies-Digestive-Rectal_Mucosa.Donor_29,15_Quies-Sm._Muscle-Duodenum_Smooth_Muscle,15_Quies-Other-Spleen,15_Quies-Brain-Brain_Mid_Frontal_Lobe,15_Quies-Sm._Muscle-Rec…
chr11	120980266	134938470	pat_162	Gain	chr11	133260751	133260924	133260751	133260924	173	intronic	OPCML	BUSH_HAR35	HAR_Merge50-00392	9_Het-Epithelial-Penis_Foreskin_Fibroblast_Primary_Cells_skin02,15_Quies-ES-deriv-hESC_Derived_CD56+_Mesoderm_Cultured_Cells,14_ReprPCWk-Muscle-Fetal_Muscle_Trunk,14_ReprPCWk-ENCODE2012-Dnd41_TCell_Leukemia,15_Quies-Other-Pancreas,15_Quies-Digestive-Rectal_Mucosa.Donor_29,9_Het-Blood_&_T-cell-Peripheral_Blood_Mononuclear_Primary_Cells,15_Quies-Sm._Muscle-Duodenum_Smooth_Muscle,15_Quies-Brain-Brai…
chr11	120980266	134938470	pat_162	Gain	chr11	133533771	133533927	133533771	133533927	156	intergenic	OPCML,SPATA19	Prabhakar_HAR497	HAR_Merge50-00393	9_Het-Epithelial-Penis_Foreskin_Fibroblast_Primary_Cells_skin02,14_ReprPCWk-Muscle-Fetal_Muscle_Trunk,15_Quies-Other-Pancreas,14_ReprPCWk-ENCODE2012-Dnd41_TCell_Leukemia,15_Quies-Digestive-Rectal_Mucosa.Donor_29,9_Het-ENCODE2012-NHLF_Lung_Fibroblasts,15_Quies-Other-Spleen,14_ReprPCWk-ENCODE2012-A549_EtOH_0.02pct_Lung_Carcinoma,15_Quies-Brain-Brain_Mid_Frontal_Lobe,15_Quies-Sm._Muscle-Rectal_Smoot…
chr11	120980266	134938470	pat_162	Gain	chr11	133810891	133811164	133810891	133811164	273	intronic	IGSF9B	Bird_HAR543	HAR_Merge50-00394	9_Het-Epithelial-Penis_Foreskin_Fibroblast_Primary_Cells_skin02,15_Quies-ES-deriv-hESC_Derived_CD56+_Mesoderm_Cultured_Cells,5_TxWk-Digestive-Colonic_Mucosa,5_TxWk-Heart-Left_Ventricle,5_TxWk-Blood_&_T-cell-CD4+_CD25-_CD45RA+_Naive_Primary_Cells,5_TxWk-ES-deriv-hESC_Derived_CD56+_Ectoderm_Cultured_Cells,14_ReprPCWk-Mesench-Bone_Marrow_Derived_Mesenchymal_Stem_Cell_Cultured_Cells,15_Quies-HSC_&_B-…
chr11	121416261	134938470	pat_163	Loss	chr11	121801206	121801409	121801206	121801409	203	intergenic	SORL1,MIR100HG	Bird_HAR538	HAR_Merge50-00373	15_Quies-ES-deriv-hESC_Derived_CD56+_Mesoderm_Cultured_Cells,1_TssA-ENCODE2012-Osteoblasts,2_TssAFlnk-Brain-Brain_Mid_Frontal_Lobe,15_Quies-Other-Pancreas,14_ReprPCWk-ENCODE2012-Dnd41_TCell_Leukemia,15_Quies-Digestive-Rectal_Mucosa.Donor_29,2_TssAFlnk-Adipose-Adipose_Nuclei,12_EnhBiv-HSC_&_B-cell-CD19_Primary_Cells_Peripheral_UW,5_TxWk-Epithelial-Penis_Foreskin_Fibroblast_Primary_Cells_skin02,2_T…
chr11	121416261	134938470	pat_163	Loss	chr11	125220634	125220648	125220634	125220648	14	intronic	PKNOX2	Toh_HAR32	HAR_Merge50-00374	15_Quies-ES-deriv-hESC_Derived_CD56+_Mesoderm_Cultured_Cells,14_ReprPCWk-Digestive-Colonic_Mucosa,5_TxWk-Heart-Left_Ventricle,14_ReprPCWk-HSC_&_B-cell-CD19_Primary_Cells_Peripheral_UW,14_ReprPCWk-ENCODE2012-Dnd41_TCell_Leukemia,1_TssA-iPSC-iPS-15b_Cell_Line,15_Quies-Sm._Muscle-Duodenum_Smooth_Muscle,15_Quies-Other-Spleen,14_ReprPCWk-ENCODE2012-A549_EtOH_0.02pct_Lung_Carcinoma,5_TxWk-ENCODE2012-NH…
chr11	121416261	134938470	pat_163	Loss	chr11	126784915	126785177	126784915	126785177	262	intronic	KIRREL3	Bird_HAR539	HAR_Merge50-00375	15_Quies-ES-deriv-hESC_Derived_CD56+_Mesoderm_Cultured_Cells,14_ReprPCWk-Muscle-Fetal_Muscle_Trunk,14_ReprPCWk-ENCODE2012-Dnd41_TCell_Leukemia,15_Quies-Digestive-Rectal_Mucosa.Donor_29,15_Quies-Sm._Muscle-Duodenum_Smooth_Muscle,5_TxWk-Brain-Brain_Hippocampus_Middle,15_Quies-Sm._Muscle-Rectal_Smooth_Muscle,15_Quies-ENCODE2012-HeLa-S3_Cervical_Carcinoma,15_Quies-HSC_&_B-cell-CD14_Primary_Cells,15_Q…
chr11	121416261	134938470	pat_163	Loss	chr11	127013462	127013655	127013462	127013655	193	intergenic	KIRREL3-AS3,ETS1	Prabhakar_HAR15	HAR_Merge50-00376	15_Quies-ES-deriv-hESC_Derived_CD56+_Mesoderm_Cultured_Cells,14_ReprPCWk-Muscle-Fetal_Muscle_Trunk,15_Quies-Other-Pancreas,14_ReprPCWk-ENCODE2012-Dnd41_TCell_Leukemia,15_Quies-Digestive-Rectal_Mucosa.Donor_29,15_Quies-Sm._Muscle-Duodenum_Smooth_Muscle,14_ReprPCWk-ENCODE2012-A549_EtOH_0.02pct_Lung_Carcinoma,15_Quies-Other-Spleen,15_Quies-Brain-Brain_Mid_Frontal_Lobe,14_ReprPCWk-Mesench-Bone_Marrow…
chr11	121416261	134938470	pat_163	Loss	chr11	127064075	127064309	127064075	127064309	234	intergenic	KIRREL3-AS3,ETS1	Prabhakar_HAR123	HAR_Merge50-00377	15_Quies-ES-deriv-hESC_Derived_CD56+_Mesoderm_Cultured_Cells,14_ReprPCWk-ENCODE2012-Dnd41_TCell_Leukemia,15_Quies-Other-Pancreas,15_Quies-Digestive-Rectal_Mucosa.Donor_29,15_Quies-Sm._Muscle-Duodenum_Smooth_Muscle,14_ReprPCWk-ENCODE2012-A549_EtOH_0.02pct_Lung_Carcinoma,15_Quies-Other-Spleen,14_ReprPCWk-Mesench-Bone_Marrow_Derived_Mesenchymal_Stem_Cell_Cultured_Cells,15_Quies-Sm._Muscle-Rectal_Smo…
chr11	121416261	134938470	pat_163	Loss	chr11	128346624	128346957	128346624	128346957	333	intronic	ETS1	Prabhakar_HAR335,Toh_HAR384	HAR_Merge50-00378	4_Tx-Muscle-Fetal_Muscle_Leg,5_TxWk-Digestive-Colonic_Mucosa,6_EnhG-HSC_&_B-cell-CD56_Primary_Cells,6_EnhG-Blood_&_T-cell-CD3_Primary_Cells_Peripheral_UW,5_TxWk-ES-deriv-hESC_Derived_CD56+_Ectoderm_Cultured_Cells,6_EnhG-Adipose-Adipose_Nuclei,5_TxWk-Brain-Brain_Hippocampus_Middle,5_TxWk-HSC_&_B-cell-CD14_Primary_Cells,7_Enh-Digestive-Stomach_Mucosa,4_Tx-ENCODE2012-Osteoblasts,2_TssAFlnk-Blood_&_T…	C11orf45
chr11	121416261	134938470	pat_163	Loss	chr11	128553832	128553912	128553832	128553912	80	intergenic	ETS1,FLI1	Toh_HAR415	HAR_Merge50-00379	12_EnhBiv-ESC-4star,13_ReprPC-iPSC-iPS_DF_6.9_Cell_Line,14_ReprPCWk-Digestive-Colonic_Mucosa,7_Enh-HSC_&_B-cell-CD15_Primary_Cells,5_TxWk-Blood_&_T-cell-CD4+_CD25-_CD45RA+_Naive_Primary_Cells,15_Quies-Other-Pancreas,13_ReprPC-Digestive-Rectal_Mucosa.Donor_29,13_ReprPC-IMR90-IMR90_Cell_Line,5_TxWk-Blood_&_T-cell-CD3_Primary_Cells_Cord_BI,13_ReprPC-Digestive-Rectal_Mucosa.Donor_31,14_ReprPCWk-Mesen…
chr11	121416261	134938470	pat_163	Loss	chr11	129274665	129274906	129274665	129274906	241	intronic	BARX2	Bird_HAR182	HAR_Merge50-00380	15_Quies-ES-deriv-hESC_Derived_CD56+_Mesoderm_Cultured_Cells,14_ReprPCWk-Muscle-Fetal_Muscle_Trunk,14_ReprPCWk-ENCODE2012-Dnd41_TCell_Leukemia,15_Quies-Digestive-Rectal_Mucosa.Donor_29,15_Quies-Sm._Muscle-Duodenum_Smooth_Muscle,14_ReprPCWk-ENCODE2012-A549_EtOH_0.02pct_Lung_Carcinoma,15_Quies-Other-Spleen,15_Quies-Sm._Muscle-Rectal_Smooth_Muscle,14_ReprPCWk-Heart-Left_Ventricle,15_Quies-iPSC-iPS-2…
chr11	121416261	134938470	pat_163	Loss	chr11	130965377	130965778	130965377	130965778	401	intergenic	SNX19,NTM	Prabhakar_HAR28,Pollard_HAR14,Bird_HAR40	HAR_Merge50-00381	15_Quies-ES-deriv-hESC_Derived_CD56+_Mesoderm_Cultured_Cells,14_ReprPCWk-Muscle-Fetal_Muscle_Trunk,15_Quies-Other-Pancreas,15_Quies-Digestive-Rectal_Mucosa.Donor_29,15_Quies-Sm._Muscle-Duodenum_Smooth_Muscle,15_Quies-Other-Spleen,15_Quies-Sm._Muscle-Rectal_Smooth_Muscle,15_Quies-ENCODE2012-HeLa-S3_Cervical_Carcinoma,15_Quies-HSC_&_B-cell-CD14_Primary_Cells,14_ReprPCWk-Heart-Left_Ventricle,15_Quie…
chr11	121416261	134938470	pat_163	Loss	chr11	131265490	131265637	131265490	131265637	147	intronic	NTM	Pollard_HAR120	HAR_Merge50-00382	15_Quies-ES-deriv-hESC_Derived_CD56+_Mesoderm_Cultured_Cells,14_ReprPCWk-Muscle-Fetal_Muscle_Trunk,14_ReprPCWk-ENCODE2012-Dnd41_TCell_Leukemia,15_Quies-Other-Pancreas,15_Quies-Digestive-Rectal_Mucosa.Donor_29,15_Quies-Sm._Muscle-Duodenum_Smooth_Muscle,15_Quies-Other-Spleen,5_TxWk-Brain-Brain_Hippocampus_Middle,15_Quies-Sm._Muscle-Rectal_Smooth_Muscle,15_Quies-iPSC-iPS-20b_Cell_Line,14_ReprPCWk-He…	NTM
chr11	121416261	134938470	pat_163	Loss	chr11	131462808	131462909	131462808	131462909	101	intronic	NTM	Toh_HAR504	HAR_Merge50-00383	14_ReprPCWk-Muscle-Fetal_Muscle_Trunk,15_Quies-Other-Pancreas,15_Quies-Digestive-Rectal_Mucosa.Donor_29,15_Quies-Sm._Muscle-Duodenum_Smooth_Muscle,15_Quies-Other-Spleen,14_ReprPCWk-ENCODE2012-A549_EtOH_0.02pct_Lung_Carcinoma,14_ReprPCWk-Mesench-Bone_Marrow_Derived_Mesenchymal_Stem_Cell_Cultured_Cells,15_Quies-Sm._Muscle-Rectal_Smooth_Muscle,15_Quies-ENCODE2012-HeLa-S3_Cervical_Carcinoma,15_Quies-…	NTM
chr11	121416261	134938470	pat_163	Loss	chr11	131522845	131522870	131522845	131522870	25	intronic	NTM	Toh_HAR446	HAR_Merge50-00384	15_Quies-ES-deriv-hESC_Derived_CD56+_Mesoderm_Cultured_Cells,15_Quies-Other-Pancreas,15_Quies-Digestive-Rectal_Mucosa.Donor_29,13_ReprPC-IMR90-IMR90_Cell_Line,15_Quies-Sm._Muscle-Duodenum_Smooth_Muscle,15_Quies-Other-Spleen,14_ReprPCWk-ENCODE2012-A549_EtOH_0.02pct_Lung_Carcinoma,15_Quies-Sm._Muscle-Rectal_Smooth_Muscle,15_Quies-HSC_&_B-cell-CD14_Primary_Cells,14_ReprPCWk-Heart-Left_Ventricle,15_Q…
chr11	121416261	134938470	pat_163	Loss	chr11	131667531	131668061	131667531	131668061	530	intronic	NTM	Bird_HAR540,Prabhakar_HAR839,Bird_HAR541	HAR_Merge50-00385	15_Quies-ES-deriv-hESC_Derived_CD56+_Mesoderm_Cultured_Cells,14_ReprPCWk-Muscle-Fetal_Muscle_Trunk,15_Quies-Other-Pancreas,14_ReprPCWk-ENCODE2012-Dnd41_TCell_Leukemia,15_Quies-Digestive-Rectal_Mucosa.Donor_29,13_ReprPC-IMR90-IMR90_Cell_Line,15_Quies-Other-Spleen,15_Quies-Brain-Brain_Mid_Frontal_Lobe,15_Quies-Sm._Muscle-Rectal_Smooth_Muscle,15_Quies-ENCODE2012-HeLa-S3_Cervical_Carcinoma,15_Quies-H…
chr11	121416261	134938470	pat_163	Loss	chr11	131681355	131681825	131681355	131681825	470	intronic	NTM	Bird_HAR542	HAR_Merge50-00386	14_ReprPCWk-Neurosph-Neurosphere_Cultured_Cells_Ganglionic_Eminence_Derived,14_ReprPCWk-Muscle-Fetal_Muscle_Trunk,15_Quies-Other-Pancreas,14_ReprPCWk-ENCODE2012-Dnd41_TCell_Leukemia,15_Quies-Digestive-Rectal_Mucosa.Donor_29,13_ReprPC-IMR90-IMR90_Cell_Line,15_Quies-Other-Spleen,5_TxWk-Brain-Brain_Hippocampus_Middle,15_Quies-Sm._Muscle-Rectal_Smooth_Muscle,15_Quies-ENCODE2012-HeLa-S3_Cervical_Carci…
chr11	121416261	134938470	pat_163	Loss	chr11	131683867	131684292	131683867	131684292	425	intronic	NTM	Prabhakar_HAR927	HAR_Merge50-00387	14_ReprPCWk-Muscle-Fetal_Muscle_Trunk,15_Quies-Other-Pancreas,14_ReprPCWk-ENCODE2012-Dnd41_TCell_Leukemia,15_Quies-Digestive-Rectal_Mucosa.Donor_29,13_ReprPC-IMR90-IMR90_Cell_Line,15_Quies-Other-Spleen,5_TxWk-Brain-Brain_Hippocampus_Middle,15_Quies-Sm._Muscle-Rectal_Smooth_Muscle,15_Quies-ENCODE2012-HeLa-S3_Cervical_Carcinoma,14_ReprPCWk-Heart-Left_Ventricle,15_Quies-HSC_&_B-cell-CD15_Primary_Cel…
chr11	121416261	134938470	pat_163	Loss	chr11	131852583	131852705	131852583	131852705	122	intronic	NTM	Prabhakar_HAR58	HAR_Merge50-00388	15_Quies-ES-deriv-hESC_Derived_CD56+_Mesoderm_Cultured_Cells,15_Quies-Other-Pancreas,15_Quies-Digestive-Rectal_Mucosa.Donor_29,5_TxWk-Epithelial-Penis_Foreskin_Fibroblast_Primary_Cells_skin02,1_TssA-iPSC-iPS-15b_Cell_Line,2_TssAFlnk-iPSC-iPS-18_Cell_Line,15_Quies-Sm._Muscle-Duodenum_Smooth_Muscle,15_Quies-Other-Spleen,2_TssAFlnk-ESC-HUES6_Cell_Line,15_Quies-Brain-Brain_Mid_Frontal_Lobe,5_TxWk-Bra…
chr11	121416261	134938470	pat_163	Loss	chr11	131948475	131948847	131948475	131948847	372	intronic	NTM	Prabhakar_HAR69	HAR_Merge50-00389	15_Quies-ES-deriv-hESC_Derived_CD56+_Mesoderm_Cultured_Cells,15_Quies-Other-Pancreas,15_Quies-Digestive-Rectal_Mucosa.Donor_29,15_Quies-Sm._Muscle-Duodenum_Smooth_Muscle,15_Quies-Other-Spleen,5_TxWk-ENCODE2012-NH-A_Astrocytes,5_TxWk-Brain-Brain_Hippocampus_Middle,15_Quies-Sm._Muscle-Rectal_Smooth_Muscle,15_Quies-ENCODE2012-HeLa-S3_Cervical_Carcinoma,15_Quies-HSC_&_B-cell-CD14_Primary_Cells,15_Qui…
chr11	121416261	134938470	pat_163	Loss	chr11	132809661	132809996	132809661	132809996	335	intronic	OPCML	Bird_HAR389,Prabhakar_HAR63	HAR_Merge50-00390	15_Quies-ES-deriv-hESC_Derived_CD56+_Mesoderm_Cultured_Cells,14_ReprPCWk-Digestive-Colonic_Mucosa,14_ReprPCWk-Muscle-Fetal_Muscle_Trunk,15_Quies-Other-Pancreas,15_Quies-Sm._Muscle-Duodenum_Smooth_Muscle,15_Quies-Other-Spleen,15_Quies-Brain-Brain_Mid_Frontal_Lobe,15_Quies-Sm._Muscle-Rectal_Smooth_Muscle,15_Quies-ENCODE2012-HeLa-S3_Cervical_Carcinoma,15_Quies-HSC_&_B-cell-CD14_Primary_Cells,14_Repr…
chr11	121416261	134938470	pat_163	Loss	chr11	133142808	133142933	133142808	133142933	125	intronic	OPCML	Prabhakar_HAR304	HAR_Merge50-00391	9_Het-Epithelial-Penis_Foreskin_Fibroblast_Primary_Cells_skin02,15_Quies-ES-deriv-hESC_Derived_CD56+_Mesoderm_Cultured_Cells,14_ReprPCWk-Muscle-Fetal_Muscle_Trunk,15_Quies-Other-Pancreas,14_ReprPCWk-ENCODE2012-Dnd41_TCell_Leukemia,15_Quies-Digestive-Rectal_Mucosa.Donor_29,15_Quies-Sm._Muscle-Duodenum_Smooth_Muscle,15_Quies-Other-Spleen,15_Quies-Brain-Brain_Mid_Frontal_Lobe,15_Quies-Sm._Muscle-Rec…
chr11	121416261	134938470	pat_163	Loss	chr11	133260751	133260924	133260751	133260924	173	intronic	OPCML	BUSH_HAR35	HAR_Merge50-00392	9_Het-Epithelial-Penis_Foreskin_Fibroblast_Primary_Cells_skin02,15_Quies-ES-deriv-hESC_Derived_CD56+_Mesoderm_Cultured_Cells,14_ReprPCWk-Muscle-Fetal_Muscle_Trunk,14_ReprPCWk-ENCODE2012-Dnd41_TCell_Leukemia,15_Quies-Other-Pancreas,15_Quies-Digestive-Rectal_Mucosa.Donor_29,9_Het-Blood_&_T-cell-Peripheral_Blood_Mononuclear_Primary_Cells,15_Quies-Sm._Muscle-Duodenum_Smooth_Muscle,15_Quies-Brain-Brai…
chr11	121416261	134938470	pat_163	Loss	chr11	133533771	133533927	133533771	133533927	156	intergenic	OPCML,SPATA19	Prabhakar_HAR497	HAR_Merge50-00393	9_Het-Epithelial-Penis_Foreskin_Fibroblast_Primary_Cells_skin02,14_ReprPCWk-Muscle-Fetal_Muscle_Trunk,15_Quies-Other-Pancreas,14_ReprPCWk-ENCODE2012-Dnd41_TCell_Leukemia,15_Quies-Digestive-Rectal_Mucosa.Donor_29,9_Het-ENCODE2012-NHLF_Lung_Fibroblasts,15_Quies-Other-Spleen,14_ReprPCWk-ENCODE2012-A549_EtOH_0.02pct_Lung_Carcinoma,15_Quies-Brain-Brain_Mid_Frontal_Lobe,15_Quies-Sm._Muscle-Rectal_Smoot…
chr11	121416261	134938470	pat_163	Loss	chr11	133810891	133811164	133810891	133811164	273	intronic	IGSF9B	Bird_HAR543	HAR_Merge50-00394	9_Het-Epithelial-Penis_Foreskin_Fibroblast_Primary_Cells_skin02,15_Quies-ES-deriv-hESC_Derived_CD56+_Mesoderm_Cultured_Cells,5_TxWk-Digestive-Colonic_Mucosa,5_TxWk-Heart-Left_Ventricle,5_TxWk-Blood_&_T-cell-CD4+_CD25-_CD45RA+_Naive_Primary_Cells,5_TxWk-ES-deriv-hESC_Derived_CD56+_Ectoderm_Cultured_Cells,14_ReprPCWk-Mesench-Bone_Marrow_Derived_Mesenchymal_Stem_Cell_Cultured_Cells,15_Quies-HSC_&_B-…
chr11	121750204	121808493	pat_010	Gain	chr11	121801206	121801409	121801206	121801409	203	intergenic	SORL1,MIR100HG	Bird_HAR538	HAR_Merge50-00373	15_Quies-ES-deriv-hESC_Derived_CD56+_Mesoderm_Cultured_Cells,1_TssA-ENCODE2012-Osteoblasts,2_TssAFlnk-Brain-Brain_Mid_Frontal_Lobe,15_Quies-Other-Pancreas,14_ReprPCWk-ENCODE2012-Dnd41_TCell_Leukemia,15_Quies-Digestive-Rectal_Mucosa.Donor_29,2_TssAFlnk-Adipose-Adipose_Nuclei,12_EnhBiv-HSC_&_B-cell-CD19_Primary_Cells_Peripheral_UW,5_TxWk-Epithelial-Penis_Foreskin_Fibroblast_Primary_Cells_skin02,2_T…
chr11	126343542	126961850	pat_013	Gain	chr11	126784915	126785177	126784915	126785177	262	intronic	KIRREL3	Bird_HAR539	HAR_Merge50-00375	15_Quies-ES-deriv-hESC_Derived_CD56+_Mesoderm_Cultured_Cells,14_ReprPCWk-Muscle-Fetal_Muscle_Trunk,14_ReprPCWk-ENCODE2012-Dnd41_TCell_Leukemia,15_Quies-Digestive-Rectal_Mucosa.Donor_29,15_Quies-Sm._Muscle-Duodenum_Smooth_Muscle,5_TxWk-Brain-Brain_Hippocampus_Middle,15_Quies-Sm._Muscle-Rectal_Smooth_Muscle,15_Quies-ENCODE2012-HeLa-S3_Cervical_Carcinoma,15_Quies-HSC_&_B-cell-CD14_Primary_Cells,15_Q…
chr11	127044915	129189000	pat_013	Loss	chr11	127064075	127064309	127064075	127064309	234	intergenic	KIRREL3-AS3,ETS1	Prabhakar_HAR123	HAR_Merge50-00377	15_Quies-ES-deriv-hESC_Derived_CD56+_Mesoderm_Cultured_Cells,14_ReprPCWk-ENCODE2012-Dnd41_TCell_Leukemia,15_Quies-Other-Pancreas,15_Quies-Digestive-Rectal_Mucosa.Donor_29,15_Quies-Sm._Muscle-Duodenum_Smooth_Muscle,14_ReprPCWk-ENCODE2012-A549_EtOH_0.02pct_Lung_Carcinoma,15_Quies-Other-Spleen,14_ReprPCWk-Mesench-Bone_Marrow_Derived_Mesenchymal_Stem_Cell_Cultured_Cells,15_Quies-Sm._Muscle-Rectal_Smo…
chr11	127044915	129189000	pat_013	Loss	chr11	128346624	128346957	128346624	128346957	333	intronic	ETS1	Prabhakar_HAR335,Toh_HAR384	HAR_Merge50-00378	4_Tx-Muscle-Fetal_Muscle_Leg,5_TxWk-Digestive-Colonic_Mucosa,6_EnhG-HSC_&_B-cell-CD56_Primary_Cells,6_EnhG-Blood_&_T-cell-CD3_Primary_Cells_Peripheral_UW,5_TxWk-ES-deriv-hESC_Derived_CD56+_Ectoderm_Cultured_Cells,6_EnhG-Adipose-Adipose_Nuclei,5_TxWk-Brain-Brain_Hippocampus_Middle,5_TxWk-HSC_&_B-cell-CD14_Primary_Cells,7_Enh-Digestive-Stomach_Mucosa,4_Tx-ENCODE2012-Osteoblasts,2_TssAFlnk-Blood_&_T…	C11orf45
chr11	127044915	129189000	pat_013	Loss	chr11	128553832	128553912	128553832	128553912	80	intergenic	ETS1,FLI1	Toh_HAR415	HAR_Merge50-00379	12_EnhBiv-ESC-4star,13_ReprPC-iPSC-iPS_DF_6.9_Cell_Line,14_ReprPCWk-Digestive-Colonic_Mucosa,7_Enh-HSC_&_B-cell-CD15_Primary_Cells,5_TxWk-Blood_&_T-cell-CD4+_CD25-_CD45RA+_Naive_Primary_Cells,15_Quies-Other-Pancreas,13_ReprPC-Digestive-Rectal_Mucosa.Donor_29,13_ReprPC-IMR90-IMR90_Cell_Line,5_TxWk-Blood_&_T-cell-CD3_Primary_Cells_Cord_BI,13_ReprPC-Digestive-Rectal_Mucosa.Donor_31,14_ReprPCWk-Mesen…
chr11	127083003	128807312	pat_009	Loss	chr11	128346624	128346957	128346624	128346957	333	intronic	ETS1	Prabhakar_HAR335,Toh_HAR384	HAR_Merge50-00378	4_Tx-Muscle-Fetal_Muscle_Leg,5_TxWk-Digestive-Colonic_Mucosa,6_EnhG-HSC_&_B-cell-CD56_Primary_Cells,6_EnhG-Blood_&_T-cell-CD3_Primary_Cells_Peripheral_UW,5_TxWk-ES-deriv-hESC_Derived_CD56+_Ectoderm_Cultured_Cells,6_EnhG-Adipose-Adipose_Nuclei,5_TxWk-Brain-Brain_Hippocampus_Middle,5_TxWk-HSC_&_B-cell-CD14_Primary_Cells,7_Enh-Digestive-Stomach_Mucosa,4_Tx-ENCODE2012-Osteoblasts,2_TssAFlnk-Blood_&_T…	C11orf45
chr11	127083003	128807312	pat_009	Loss	chr11	128553832	128553912	128553832	128553912	80	intergenic	ETS1,FLI1	Toh_HAR415	HAR_Merge50-00379	12_EnhBiv-ESC-4star,13_ReprPC-iPSC-iPS_DF_6.9_Cell_Line,14_ReprPCWk-Digestive-Colonic_Mucosa,7_Enh-HSC_&_B-cell-CD15_Primary_Cells,5_TxWk-Blood_&_T-cell-CD4+_CD25-_CD45RA+_Naive_Primary_Cells,15_Quies-Other-Pancreas,13_ReprPC-Digestive-Rectal_Mucosa.Donor_29,13_ReprPC-IMR90-IMR90_Cell_Line,5_TxWk-Blood_&_T-cell-CD3_Primary_Cells_Cord_BI,13_ReprPC-Digestive-Rectal_Mucosa.Donor_31,14_ReprPCWk-Mesen…
chr11	127134890	129992730	pat_004	Loss	chr11	128346624	128346957	128346624	128346957	333	intronic	ETS1	Prabhakar_HAR335,Toh_HAR384	HAR_Merge50-00378	4_Tx-Muscle-Fetal_Muscle_Leg,5_TxWk-Digestive-Colonic_Mucosa,6_EnhG-HSC_&_B-cell-CD56_Primary_Cells,6_EnhG-Blood_&_T-cell-CD3_Primary_Cells_Peripheral_UW,5_TxWk-ES-deriv-hESC_Derived_CD56+_Ectoderm_Cultured_Cells,6_EnhG-Adipose-Adipose_Nuclei,5_TxWk-Brain-Brain_Hippocampus_Middle,5_TxWk-HSC_&_B-cell-CD14_Primary_Cells,7_Enh-Digestive-Stomach_Mucosa,4_Tx-ENCODE2012-Osteoblasts,2_TssAFlnk-Blood_&_T…	C11orf45
chr11	127134890	129992730	pat_004	Loss	chr11	128553832	128553912	128553832	128553912	80	intergenic	ETS1,FLI1	Toh_HAR415	HAR_Merge50-00379	12_EnhBiv-ESC-4star,13_ReprPC-iPSC-iPS_DF_6.9_Cell_Line,14_ReprPCWk-Digestive-Colonic_Mucosa,7_Enh-HSC_&_B-cell-CD15_Primary_Cells,5_TxWk-Blood_&_T-cell-CD4+_CD25-_CD45RA+_Naive_Primary_Cells,15_Quies-Other-Pancreas,13_ReprPC-Digestive-Rectal_Mucosa.Donor_29,13_ReprPC-IMR90-IMR90_Cell_Line,5_TxWk-Blood_&_T-cell-CD3_Primary_Cells_Cord_BI,13_ReprPC-Digestive-Rectal_Mucosa.Donor_31,14_ReprPCWk-Mesen…
chr11	127134890	129992730	pat_004	Loss	chr11	129274665	129274906	129274665	129274906	241	intronic	BARX2	Bird_HAR182	HAR_Merge50-00380	15_Quies-ES-deriv-hESC_Derived_CD56+_Mesoderm_Cultured_Cells,14_ReprPCWk-Muscle-Fetal_Muscle_Trunk,14_ReprPCWk-ENCODE2012-Dnd41_TCell_Leukemia,15_Quies-Digestive-Rectal_Mucosa.Donor_29,15_Quies-Sm._Muscle-Duodenum_Smooth_Muscle,14_ReprPCWk-ENCODE2012-A549_EtOH_0.02pct_Lung_Carcinoma,15_Quies-Other-Spleen,15_Quies-Sm._Muscle-Rectal_Smooth_Muscle,14_ReprPCWk-Heart-Left_Ventricle,15_Quies-iPSC-iPS-2…
chr11	128326183	128354700	pat_010	Gain	chr11	128346624	128346957	128346624	128346957	333	intronic	ETS1	Prabhakar_HAR335,Toh_HAR384	HAR_Merge50-00378	4_Tx-Muscle-Fetal_Muscle_Leg,5_TxWk-Digestive-Colonic_Mucosa,6_EnhG-HSC_&_B-cell-CD56_Primary_Cells,6_EnhG-Blood_&_T-cell-CD3_Primary_Cells_Peripheral_UW,5_TxWk-ES-deriv-hESC_Derived_CD56+_Ectoderm_Cultured_Cells,6_EnhG-Adipose-Adipose_Nuclei,5_TxWk-Brain-Brain_Hippocampus_Middle,5_TxWk-HSC_&_B-cell-CD14_Primary_Cells,7_Enh-Digestive-Stomach_Mucosa,4_Tx-ENCODE2012-Osteoblasts,2_TssAFlnk-Blood_&_T…	C11orf45
chr11	129194150	129276829	pat_010	Gain	chr11	129274665	129274906	129274665	129274906	241	intronic	BARX2	Bird_HAR182	HAR_Merge50-00380	15_Quies-ES-deriv-hESC_Derived_CD56+_Mesoderm_Cultured_Cells,14_ReprPCWk-Muscle-Fetal_Muscle_Trunk,14_ReprPCWk-ENCODE2012-Dnd41_TCell_Leukemia,15_Quies-Digestive-Rectal_Mucosa.Donor_29,15_Quies-Sm._Muscle-Duodenum_Smooth_Muscle,14_ReprPCWk-ENCODE2012-A549_EtOH_0.02pct_Lung_Carcinoma,15_Quies-Other-Spleen,15_Quies-Sm._Muscle-Rectal_Smooth_Muscle,14_ReprPCWk-Heart-Left_Ventricle,15_Quies-iPSC-iPS-2…
chr11	130009581	132355029	pat_009	Gain	chr11	130965377	130965778	130965377	130965778	401	intergenic	SNX19,NTM	Prabhakar_HAR28,Pollard_HAR14,Bird_HAR40	HAR_Merge50-00381	15_Quies-ES-deriv-hESC_Derived_CD56+_Mesoderm_Cultured_Cells,14_ReprPCWk-Muscle-Fetal_Muscle_Trunk,15_Quies-Other-Pancreas,15_Quies-Digestive-Rectal_Mucosa.Donor_29,15_Quies-Sm._Muscle-Duodenum_Smooth_Muscle,15_Quies-Other-Spleen,15_Quies-Sm._Muscle-Rectal_Smooth_Muscle,15_Quies-ENCODE2012-HeLa-S3_Cervical_Carcinoma,15_Quies-HSC_&_B-cell-CD14_Primary_Cells,14_ReprPCWk-Heart-Left_Ventricle,15_Quie…
chr11	130009581	132355029	pat_009	Gain	chr11	131265490	131265637	131265490	131265637	147	intronic	NTM	Pollard_HAR120	HAR_Merge50-00382	15_Quies-ES-deriv-hESC_Derived_CD56+_Mesoderm_Cultured_Cells,14_ReprPCWk-Muscle-Fetal_Muscle_Trunk,14_ReprPCWk-ENCODE2012-Dnd41_TCell_Leukemia,15_Quies-Other-Pancreas,15_Quies-Digestive-Rectal_Mucosa.Donor_29,15_Quies-Sm._Muscle-Duodenum_Smooth_Muscle,15_Quies-Other-Spleen,5_TxWk-Brain-Brain_Hippocampus_Middle,15_Quies-Sm._Muscle-Rectal_Smooth_Muscle,15_Quies-iPSC-iPS-20b_Cell_Line,14_ReprPCWk-He…	NTM
chr11	130009581	132355029	pat_009	Gain	chr11	131462808	131462909	131462808	131462909	101	intronic	NTM	Toh_HAR504	HAR_Merge50-00383	14_ReprPCWk-Muscle-Fetal_Muscle_Trunk,15_Quies-Other-Pancreas,15_Quies-Digestive-Rectal_Mucosa.Donor_29,15_Quies-Sm._Muscle-Duodenum_Smooth_Muscle,15_Quies-Other-Spleen,14_ReprPCWk-ENCODE2012-A549_EtOH_0.02pct_Lung_Carcinoma,14_ReprPCWk-Mesench-Bone_Marrow_Derived_Mesenchymal_Stem_Cell_Cultured_Cells,15_Quies-Sm._Muscle-Rectal_Smooth_Muscle,15_Quies-ENCODE2012-HeLa-S3_Cervical_Carcinoma,15_Quies-…	NTM
chr11	130009581	132355029	pat_009	Gain	chr11	131522845	131522870	131522845	131522870	25	intronic	NTM	Toh_HAR446	HAR_Merge50-00384	15_Quies-ES-deriv-hESC_Derived_CD56+_Mesoderm_Cultured_Cells,15_Quies-Other-Pancreas,15_Quies-Digestive-Rectal_Mucosa.Donor_29,13_ReprPC-IMR90-IMR90_Cell_Line,15_Quies-Sm._Muscle-Duodenum_Smooth_Muscle,15_Quies-Other-Spleen,14_ReprPCWk-ENCODE2012-A549_EtOH_0.02pct_Lung_Carcinoma,15_Quies-Sm._Muscle-Rectal_Smooth_Muscle,15_Quies-HSC_&_B-cell-CD14_Primary_Cells,14_ReprPCWk-Heart-Left_Ventricle,15_Q…
chr11	130009581	132355029	pat_009	Gain	chr11	131667531	131668061	131667531	131668061	530	intronic	NTM	Bird_HAR540,Prabhakar_HAR839,Bird_HAR541	HAR_Merge50-00385	15_Quies-ES-deriv-hESC_Derived_CD56+_Mesoderm_Cultured_Cells,14_ReprPCWk-Muscle-Fetal_Muscle_Trunk,15_Quies-Other-Pancreas,14_ReprPCWk-ENCODE2012-Dnd41_TCell_Leukemia,15_Quies-Digestive-Rectal_Mucosa.Donor_29,13_ReprPC-IMR90-IMR90_Cell_Line,15_Quies-Other-Spleen,15_Quies-Brain-Brain_Mid_Frontal_Lobe,15_Quies-Sm._Muscle-Rectal_Smooth_Muscle,15_Quies-ENCODE2012-HeLa-S3_Cervical_Carcinoma,15_Quies-H…
chr11	130009581	132355029	pat_009	Gain	chr11	131681355	131681825	131681355	131681825	470	intronic	NTM	Bird_HAR542	HAR_Merge50-00386	14_ReprPCWk-Neurosph-Neurosphere_Cultured_Cells_Ganglionic_Eminence_Derived,14_ReprPCWk-Muscle-Fetal_Muscle_Trunk,15_Quies-Other-Pancreas,14_ReprPCWk-ENCODE2012-Dnd41_TCell_Leukemia,15_Quies-Digestive-Rectal_Mucosa.Donor_29,13_ReprPC-IMR90-IMR90_Cell_Line,15_Quies-Other-Spleen,5_TxWk-Brain-Brain_Hippocampus_Middle,15_Quies-Sm._Muscle-Rectal_Smooth_Muscle,15_Quies-ENCODE2012-HeLa-S3_Cervical_Carci…
chr11	130009581	132355029	pat_009	Gain	chr11	131683867	131684292	131683867	131684292	425	intronic	NTM	Prabhakar_HAR927	HAR_Merge50-00387	14_ReprPCWk-Muscle-Fetal_Muscle_Trunk,15_Quies-Other-Pancreas,14_ReprPCWk-ENCODE2012-Dnd41_TCell_Leukemia,15_Quies-Digestive-Rectal_Mucosa.Donor_29,13_ReprPC-IMR90-IMR90_Cell_Line,15_Quies-Other-Spleen,5_TxWk-Brain-Brain_Hippocampus_Middle,15_Quies-Sm._Muscle-Rectal_Smooth_Muscle,15_Quies-ENCODE2012-HeLa-S3_Cervical_Carcinoma,14_ReprPCWk-Heart-Left_Ventricle,15_Quies-HSC_&_B-cell-CD15_Primary_Cel…
chr11	130009581	132355029	pat_009	Gain	chr11	131852583	131852705	131852583	131852705	122	intronic	NTM	Prabhakar_HAR58	HAR_Merge50-00388	15_Quies-ES-deriv-hESC_Derived_CD56+_Mesoderm_Cultured_Cells,15_Quies-Other-Pancreas,15_Quies-Digestive-Rectal_Mucosa.Donor_29,5_TxWk-Epithelial-Penis_Foreskin_Fibroblast_Primary_Cells_skin02,1_TssA-iPSC-iPS-15b_Cell_Line,2_TssAFlnk-iPSC-iPS-18_Cell_Line,15_Quies-Sm._Muscle-Duodenum_Smooth_Muscle,15_Quies-Other-Spleen,2_TssAFlnk-ESC-HUES6_Cell_Line,15_Quies-Brain-Brain_Mid_Frontal_Lobe,5_TxWk-Bra…
chr11	130009581	132355029	pat_009	Gain	chr11	131948475	131948847	131948475	131948847	372	intronic	NTM	Prabhakar_HAR69	HAR_Merge50-00389	15_Quies-ES-deriv-hESC_Derived_CD56+_Mesoderm_Cultured_Cells,15_Quies-Other-Pancreas,15_Quies-Digestive-Rectal_Mucosa.Donor_29,15_Quies-Sm._Muscle-Duodenum_Smooth_Muscle,15_Quies-Other-Spleen,5_TxWk-ENCODE2012-NH-A_Astrocytes,5_TxWk-Brain-Brain_Hippocampus_Middle,15_Quies-Sm._Muscle-Rectal_Smooth_Muscle,15_Quies-ENCODE2012-HeLa-S3_Cervical_Carcinoma,15_Quies-HSC_&_B-cell-CD14_Primary_Cells,15_Qui…
chr11	131244667	131293577	pat_010	Gain	chr11	131265490	131265637	131265490	131265637	147	intronic	NTM	Pollard_HAR120	HAR_Merge50-00382	15_Quies-ES-deriv-hESC_Derived_CD56+_Mesoderm_Cultured_Cells,14_ReprPCWk-Muscle-Fetal_Muscle_Trunk,14_ReprPCWk-ENCODE2012-Dnd41_TCell_Leukemia,15_Quies-Other-Pancreas,15_Quies-Digestive-Rectal_Mucosa.Donor_29,15_Quies-Sm._Muscle-Duodenum_Smooth_Muscle,15_Quies-Other-Spleen,5_TxWk-Brain-Brain_Hippocampus_Middle,15_Quies-Sm._Muscle-Rectal_Smooth_Muscle,15_Quies-iPSC-iPS-20b_Cell_Line,14_ReprPCWk-He…	NTM
chr11	131336174	134938470	pat_148	Gain	chr11	131462808	131462909	131462808	131462909	101	intronic	NTM	Toh_HAR504	HAR_Merge50-00383	14_ReprPCWk-Muscle-Fetal_Muscle_Trunk,15_Quies-Other-Pancreas,15_Quies-Digestive-Rectal_Mucosa.Donor_29,15_Quies-Sm._Muscle-Duodenum_Smooth_Muscle,15_Quies-Other-Spleen,14_ReprPCWk-ENCODE2012-A549_EtOH_0.02pct_Lung_Carcinoma,14_ReprPCWk-Mesench-Bone_Marrow_Derived_Mesenchymal_Stem_Cell_Cultured_Cells,15_Quies-Sm._Muscle-Rectal_Smooth_Muscle,15_Quies-ENCODE2012-HeLa-S3_Cervical_Carcinoma,15_Quies-…	NTM
chr11	131336174	134938470	pat_148	Gain	chr11	131522845	131522870	131522845	131522870	25	intronic	NTM	Toh_HAR446	HAR_Merge50-00384	15_Quies-ES-deriv-hESC_Derived_CD56+_Mesoderm_Cultured_Cells,15_Quies-Other-Pancreas,15_Quies-Digestive-Rectal_Mucosa.Donor_29,13_ReprPC-IMR90-IMR90_Cell_Line,15_Quies-Sm._Muscle-Duodenum_Smooth_Muscle,15_Quies-Other-Spleen,14_ReprPCWk-ENCODE2012-A549_EtOH_0.02pct_Lung_Carcinoma,15_Quies-Sm._Muscle-Rectal_Smooth_Muscle,15_Quies-HSC_&_B-cell-CD14_Primary_Cells,14_ReprPCWk-Heart-Left_Ventricle,15_Q…
chr11	131336174	134938470	pat_148	Gain	chr11	131667531	131668061	131667531	131668061	530	intronic	NTM	Bird_HAR540,Prabhakar_HAR839,Bird_HAR541	HAR_Merge50-00385	15_Quies-ES-deriv-hESC_Derived_CD56+_Mesoderm_Cultured_Cells,14_ReprPCWk-Muscle-Fetal_Muscle_Trunk,15_Quies-Other-Pancreas,14_ReprPCWk-ENCODE2012-Dnd41_TCell_Leukemia,15_Quies-Digestive-Rectal_Mucosa.Donor_29,13_ReprPC-IMR90-IMR90_Cell_Line,15_Quies-Other-Spleen,15_Quies-Brain-Brain_Mid_Frontal_Lobe,15_Quies-Sm._Muscle-Rectal_Smooth_Muscle,15_Quies-ENCODE2012-HeLa-S3_Cervical_Carcinoma,15_Quies-H…
chr11	131336174	134938470	pat_148	Gain	chr11	131681355	131681825	131681355	131681825	470	intronic	NTM	Bird_HAR542	HAR_Merge50-00386	14_ReprPCWk-Neurosph-Neurosphere_Cultured_Cells_Ganglionic_Eminence_Derived,14_ReprPCWk-Muscle-Fetal_Muscle_Trunk,15_Quies-Other-Pancreas,14_ReprPCWk-ENCODE2012-Dnd41_TCell_Leukemia,15_Quies-Digestive-Rectal_Mucosa.Donor_29,13_ReprPC-IMR90-IMR90_Cell_Line,15_Quies-Other-Spleen,5_TxWk-Brain-Brain_Hippocampus_Middle,15_Quies-Sm._Muscle-Rectal_Smooth_Muscle,15_Quies-ENCODE2012-HeLa-S3_Cervical_Carci…
chr11	131336174	134938470	pat_148	Gain	chr11	131683867	131684292	131683867	131684292	425	intronic	NTM	Prabhakar_HAR927	HAR_Merge50-00387	14_ReprPCWk-Muscle-Fetal_Muscle_Trunk,15_Quies-Other-Pancreas,14_ReprPCWk-ENCODE2012-Dnd41_TCell_Leukemia,15_Quies-Digestive-Rectal_Mucosa.Donor_29,13_ReprPC-IMR90-IMR90_Cell_Line,15_Quies-Other-Spleen,5_TxWk-Brain-Brain_Hippocampus_Middle,15_Quies-Sm._Muscle-Rectal_Smooth_Muscle,15_Quies-ENCODE2012-HeLa-S3_Cervical_Carcinoma,14_ReprPCWk-Heart-Left_Ventricle,15_Quies-HSC_&_B-cell-CD15_Primary_Cel…
chr11	131336174	134938470	pat_148	Gain	chr11	131852583	131852705	131852583	131852705	122	intronic	NTM	Prabhakar_HAR58	HAR_Merge50-00388	15_Quies-ES-deriv-hESC_Derived_CD56+_Mesoderm_Cultured_Cells,15_Quies-Other-Pancreas,15_Quies-Digestive-Rectal_Mucosa.Donor_29,5_TxWk-Epithelial-Penis_Foreskin_Fibroblast_Primary_Cells_skin02,1_TssA-iPSC-iPS-15b_Cell_Line,2_TssAFlnk-iPSC-iPS-18_Cell_Line,15_Quies-Sm._Muscle-Duodenum_Smooth_Muscle,15_Quies-Other-Spleen,2_TssAFlnk-ESC-HUES6_Cell_Line,15_Quies-Brain-Brain_Mid_Frontal_Lobe,5_TxWk-Bra…
chr11	131336174	134938470	pat_148	Gain	chr11	131948475	131948847	131948475	131948847	372	intronic	NTM	Prabhakar_HAR69	HAR_Merge50-00389	15_Quies-ES-deriv-hESC_Derived_CD56+_Mesoderm_Cultured_Cells,15_Quies-Other-Pancreas,15_Quies-Digestive-Rectal_Mucosa.Donor_29,15_Quies-Sm._Muscle-Duodenum_Smooth_Muscle,15_Quies-Other-Spleen,5_TxWk-ENCODE2012-NH-A_Astrocytes,5_TxWk-Brain-Brain_Hippocampus_Middle,15_Quies-Sm._Muscle-Rectal_Smooth_Muscle,15_Quies-ENCODE2012-HeLa-S3_Cervical_Carcinoma,15_Quies-HSC_&_B-cell-CD14_Primary_Cells,15_Qui…
chr11	131336174	134938470	pat_148	Gain	chr11	132809661	132809996	132809661	132809996	335	intronic	OPCML	Bird_HAR389,Prabhakar_HAR63	HAR_Merge50-00390	15_Quies-ES-deriv-hESC_Derived_CD56+_Mesoderm_Cultured_Cells,14_ReprPCWk-Digestive-Colonic_Mucosa,14_ReprPCWk-Muscle-Fetal_Muscle_Trunk,15_Quies-Other-Pancreas,15_Quies-Sm._Muscle-Duodenum_Smooth_Muscle,15_Quies-Other-Spleen,15_Quies-Brain-Brain_Mid_Frontal_Lobe,15_Quies-Sm._Muscle-Rectal_Smooth_Muscle,15_Quies-ENCODE2012-HeLa-S3_Cervical_Carcinoma,15_Quies-HSC_&_B-cell-CD14_Primary_Cells,14_Repr…
chr11	131336174	134938470	pat_148	Gain	chr11	133142808	133142933	133142808	133142933	125	intronic	OPCML	Prabhakar_HAR304	HAR_Merge50-00391	9_Het-Epithelial-Penis_Foreskin_Fibroblast_Primary_Cells_skin02,15_Quies-ES-deriv-hESC_Derived_CD56+_Mesoderm_Cultured_Cells,14_ReprPCWk-Muscle-Fetal_Muscle_Trunk,15_Quies-Other-Pancreas,14_ReprPCWk-ENCODE2012-Dnd41_TCell_Leukemia,15_Quies-Digestive-Rectal_Mucosa.Donor_29,15_Quies-Sm._Muscle-Duodenum_Smooth_Muscle,15_Quies-Other-Spleen,15_Quies-Brain-Brain_Mid_Frontal_Lobe,15_Quies-Sm._Muscle-Rec…
chr11	131336174	134938470	pat_148	Gain	chr11	133260751	133260924	133260751	133260924	173	intronic	OPCML	BUSH_HAR35	HAR_Merge50-00392	9_Het-Epithelial-Penis_Foreskin_Fibroblast_Primary_Cells_skin02,15_Quies-ES-deriv-hESC_Derived_CD56+_Mesoderm_Cultured_Cells,14_ReprPCWk-Muscle-Fetal_Muscle_Trunk,14_ReprPCWk-ENCODE2012-Dnd41_TCell_Leukemia,15_Quies-Other-Pancreas,15_Quies-Digestive-Rectal_Mucosa.Donor_29,9_Het-Blood_&_T-cell-Peripheral_Blood_Mononuclear_Primary_Cells,15_Quies-Sm._Muscle-Duodenum_Smooth_Muscle,15_Quies-Brain-Brai…
chr11	131336174	134938470	pat_148	Gain	chr11	133533771	133533927	133533771	133533927	156	intergenic	OPCML,SPATA19	Prabhakar_HAR497	HAR_Merge50-00393	9_Het-Epithelial-Penis_Foreskin_Fibroblast_Primary_Cells_skin02,14_ReprPCWk-Muscle-Fetal_Muscle_Trunk,15_Quies-Other-Pancreas,14_ReprPCWk-ENCODE2012-Dnd41_TCell_Leukemia,15_Quies-Digestive-Rectal_Mucosa.Donor_29,9_Het-ENCODE2012-NHLF_Lung_Fibroblasts,15_Quies-Other-Spleen,14_ReprPCWk-ENCODE2012-A549_EtOH_0.02pct_Lung_Carcinoma,15_Quies-Brain-Brain_Mid_Frontal_Lobe,15_Quies-Sm._Muscle-Rectal_Smoot…
chr11	131336174	134938470	pat_148	Gain	chr11	133810891	133811164	133810891	133811164	273	intronic	IGSF9B	Bird_HAR543	HAR_Merge50-00394	9_Het-Epithelial-Penis_Foreskin_Fibroblast_Primary_Cells_skin02,15_Quies-ES-deriv-hESC_Derived_CD56+_Mesoderm_Cultured_Cells,5_TxWk-Digestive-Colonic_Mucosa,5_TxWk-Heart-Left_Ventricle,5_TxWk-Blood_&_T-cell-CD4+_CD25-_CD45RA+_Naive_Primary_Cells,5_TxWk-ES-deriv-hESC_Derived_CD56+_Ectoderm_Cultured_Cells,14_ReprPCWk-Mesench-Bone_Marrow_Derived_Mesenchymal_Stem_Cell_Cultured_Cells,15_Quies-HSC_&_B-…
chr11	131356184	131519083	pat_009	Gain	chr11	131462808	131462909	131462808	131462909	101	intronic	NTM	Toh_HAR504	HAR_Merge50-00383	14_ReprPCWk-Muscle-Fetal_Muscle_Trunk,15_Quies-Other-Pancreas,15_Quies-Digestive-Rectal_Mucosa.Donor_29,15_Quies-Sm._Muscle-Duodenum_Smooth_Muscle,15_Quies-Other-Spleen,14_ReprPCWk-ENCODE2012-A549_EtOH_0.02pct_Lung_Carcinoma,14_ReprPCWk-Mesench-Bone_Marrow_Derived_Mesenchymal_Stem_Cell_Cultured_Cells,15_Quies-Sm._Muscle-Rectal_Smooth_Muscle,15_Quies-ENCODE2012-HeLa-S3_Cervical_Carcinoma,15_Quies-…	NTM
chr11	131372231	131519083	pat_013	Gain	chr11	131462808	131462909	131462808	131462909	101	intronic	NTM	Toh_HAR504	HAR_Merge50-00383	14_ReprPCWk-Muscle-Fetal_Muscle_Trunk,15_Quies-Other-Pancreas,15_Quies-Digestive-Rectal_Mucosa.Donor_29,15_Quies-Sm._Muscle-Duodenum_Smooth_Muscle,15_Quies-Other-Spleen,14_ReprPCWk-ENCODE2012-A549_EtOH_0.02pct_Lung_Carcinoma,14_ReprPCWk-Mesench-Bone_Marrow_Derived_Mesenchymal_Stem_Cell_Cultured_Cells,15_Quies-Sm._Muscle-Rectal_Smooth_Muscle,15_Quies-ENCODE2012-HeLa-S3_Cervical_Carcinoma,15_Quies-…	NTM
chr11	131665049	131672201	pat_164	Loss	chr11	131667531	131668061	131667531	131668061	530	intronic	NTM	Bird_HAR540,Prabhakar_HAR839,Bird_HAR541	HAR_Merge50-00385	15_Quies-ES-deriv-hESC_Derived_CD56+_Mesoderm_Cultured_Cells,14_ReprPCWk-Muscle-Fetal_Muscle_Trunk,15_Quies-Other-Pancreas,14_ReprPCWk-ENCODE2012-Dnd41_TCell_Leukemia,15_Quies-Digestive-Rectal_Mucosa.Donor_29,13_ReprPC-IMR90-IMR90_Cell_Line,15_Quies-Other-Spleen,15_Quies-Brain-Brain_Mid_Frontal_Lobe,15_Quies-Sm._Muscle-Rectal_Smooth_Muscle,15_Quies-ENCODE2012-HeLa-S3_Cervical_Carcinoma,15_Quies-H…
chr11	131907669	132348742	pat_013	Gain	chr11	131948475	131948847	131948475	131948847	372	intronic	NTM	Prabhakar_HAR69	HAR_Merge50-00389	15_Quies-ES-deriv-hESC_Derived_CD56+_Mesoderm_Cultured_Cells,15_Quies-Other-Pancreas,15_Quies-Digestive-Rectal_Mucosa.Donor_29,15_Quies-Sm._Muscle-Duodenum_Smooth_Muscle,15_Quies-Other-Spleen,5_TxWk-ENCODE2012-NH-A_Astrocytes,5_TxWk-Brain-Brain_Hippocampus_Middle,15_Quies-Sm._Muscle-Rectal_Smooth_Muscle,15_Quies-ENCODE2012-HeLa-S3_Cervical_Carcinoma,15_Quies-HSC_&_B-cell-CD14_Primary_Cells,15_Qui…
chr11	131939421	131954641	pat_010	Loss	chr11	131948475	131948847	131948475	131948847	372	intronic	NTM	Prabhakar_HAR69	HAR_Merge50-00389	15_Quies-ES-deriv-hESC_Derived_CD56+_Mesoderm_Cultured_Cells,15_Quies-Other-Pancreas,15_Quies-Digestive-Rectal_Mucosa.Donor_29,15_Quies-Sm._Muscle-Duodenum_Smooth_Muscle,15_Quies-Other-Spleen,5_TxWk-ENCODE2012-NH-A_Astrocytes,5_TxWk-Brain-Brain_Hippocampus_Middle,15_Quies-Sm._Muscle-Rectal_Smooth_Muscle,15_Quies-ENCODE2012-HeLa-S3_Cervical_Carcinoma,15_Quies-HSC_&_B-cell-CD14_Primary_Cells,15_Qui…
chr11	132700765	132935388	pat_009	Gain	chr11	132809661	132809996	132809661	132809996	335	intronic	OPCML	Bird_HAR389,Prabhakar_HAR63	HAR_Merge50-00390	15_Quies-ES-deriv-hESC_Derived_CD56+_Mesoderm_Cultured_Cells,14_ReprPCWk-Digestive-Colonic_Mucosa,14_ReprPCWk-Muscle-Fetal_Muscle_Trunk,15_Quies-Other-Pancreas,15_Quies-Sm._Muscle-Duodenum_Smooth_Muscle,15_Quies-Other-Spleen,15_Quies-Brain-Brain_Mid_Frontal_Lobe,15_Quies-Sm._Muscle-Rectal_Smooth_Muscle,15_Quies-ENCODE2012-HeLa-S3_Cervical_Carcinoma,15_Quies-HSC_&_B-cell-CD14_Primary_Cells,14_Repr…
chr11	132790827	132816091	pat_012	Gain	chr11	132809661	132809996	132809661	132809996	335	intronic	OPCML	Bird_HAR389,Prabhakar_HAR63	HAR_Merge50-00390	15_Quies-ES-deriv-hESC_Derived_CD56+_Mesoderm_Cultured_Cells,14_ReprPCWk-Digestive-Colonic_Mucosa,14_ReprPCWk-Muscle-Fetal_Muscle_Trunk,15_Quies-Other-Pancreas,15_Quies-Sm._Muscle-Duodenum_Smooth_Muscle,15_Quies-Other-Spleen,15_Quies-Brain-Brain_Mid_Frontal_Lobe,15_Quies-Sm._Muscle-Rectal_Smooth_Muscle,15_Quies-ENCODE2012-HeLa-S3_Cervical_Carcinoma,15_Quies-HSC_&_B-cell-CD14_Primary_Cells,14_Repr…
chr11	132801054	132824872	pat_010	Gain	chr11	132809661	132809996	132809661	132809996	335	intronic	OPCML	Bird_HAR389,Prabhakar_HAR63	HAR_Merge50-00390	15_Quies-ES-deriv-hESC_Derived_CD56+_Mesoderm_Cultured_Cells,14_ReprPCWk-Digestive-Colonic_Mucosa,14_ReprPCWk-Muscle-Fetal_Muscle_Trunk,15_Quies-Other-Pancreas,15_Quies-Sm._Muscle-Duodenum_Smooth_Muscle,15_Quies-Other-Spleen,15_Quies-Brain-Brain_Mid_Frontal_Lobe,15_Quies-Sm._Muscle-Rectal_Smooth_Muscle,15_Quies-ENCODE2012-HeLa-S3_Cervical_Carcinoma,15_Quies-HSC_&_B-cell-CD14_Primary_Cells,14_Repr…
chr11	133069419	134938470	pat_165	Gain	chr11	133142808	133142933	133142808	133142933	125	intronic	OPCML	Prabhakar_HAR304	HAR_Merge50-00391	9_Het-Epithelial-Penis_Foreskin_Fibroblast_Primary_Cells_skin02,15_Quies-ES-deriv-hESC_Derived_CD56+_Mesoderm_Cultured_Cells,14_ReprPCWk-Muscle-Fetal_Muscle_Trunk,15_Quies-Other-Pancreas,14_ReprPCWk-ENCODE2012-Dnd41_TCell_Leukemia,15_Quies-Digestive-Rectal_Mucosa.Donor_29,15_Quies-Sm._Muscle-Duodenum_Smooth_Muscle,15_Quies-Other-Spleen,15_Quies-Brain-Brain_Mid_Frontal_Lobe,15_Quies-Sm._Muscle-Rec…
chr11	133069419	134938470	pat_165	Gain	chr11	133260751	133260924	133260751	133260924	173	intronic	OPCML	BUSH_HAR35	HAR_Merge50-00392	9_Het-Epithelial-Penis_Foreskin_Fibroblast_Primary_Cells_skin02,15_Quies-ES-deriv-hESC_Derived_CD56+_Mesoderm_Cultured_Cells,14_ReprPCWk-Muscle-Fetal_Muscle_Trunk,14_ReprPCWk-ENCODE2012-Dnd41_TCell_Leukemia,15_Quies-Other-Pancreas,15_Quies-Digestive-Rectal_Mucosa.Donor_29,9_Het-Blood_&_T-cell-Peripheral_Blood_Mononuclear_Primary_Cells,15_Quies-Sm._Muscle-Duodenum_Smooth_Muscle,15_Quies-Brain-Brai…
chr11	133069419	134938470	pat_165	Gain	chr11	133533771	133533927	133533771	133533927	156	intergenic	OPCML,SPATA19	Prabhakar_HAR497	HAR_Merge50-00393	9_Het-Epithelial-Penis_Foreskin_Fibroblast_Primary_Cells_skin02,14_ReprPCWk-Muscle-Fetal_Muscle_Trunk,15_Quies-Other-Pancreas,14_ReprPCWk-ENCODE2012-Dnd41_TCell_Leukemia,15_Quies-Digestive-Rectal_Mucosa.Donor_29,9_Het-ENCODE2012-NHLF_Lung_Fibroblasts,15_Quies-Other-Spleen,14_ReprPCWk-ENCODE2012-A549_EtOH_0.02pct_Lung_Carcinoma,15_Quies-Brain-Brain_Mid_Frontal_Lobe,15_Quies-Sm._Muscle-Rectal_Smoot…
[truncated: 5,362 more rows]

## Sheet: Tab.2
HAR_ID	HAR_patient_count	Chr	Start	End	Func.refGene	Gene.refGene
HAR_Merge50-02702	425	chrX	115140187	115140417	intergenic	PLS3
HAR_Merge50-02702	425	chrX	115140187	115140417	intergenic	AGTR2
HAR_Merge50-02080	243	chr5	180409675	180410052	intergenic	BTNL8
[truncated: 78 more rows]

## Sheet: Tab.3
HAR_A	HAR_B	Co_occurrence	Jaccard	Cluster
[truncated: 293 more rows]

[truncated: 2 more sheets: Tab.4, Tab.5]
